# Supplementary material for: Gene Expression Analysis of Zebrafish Melanocytes, Iridophores, and Retinal Pigmented Epithelium Reveals Indicators of Biological Function and Developmental Origin
Source: PubMed Central journal article supplement (PMC3706446; doi:10.1371/journal.pone.0067801), 2013-07-09

# Pearson Correlation of RNAseq Data

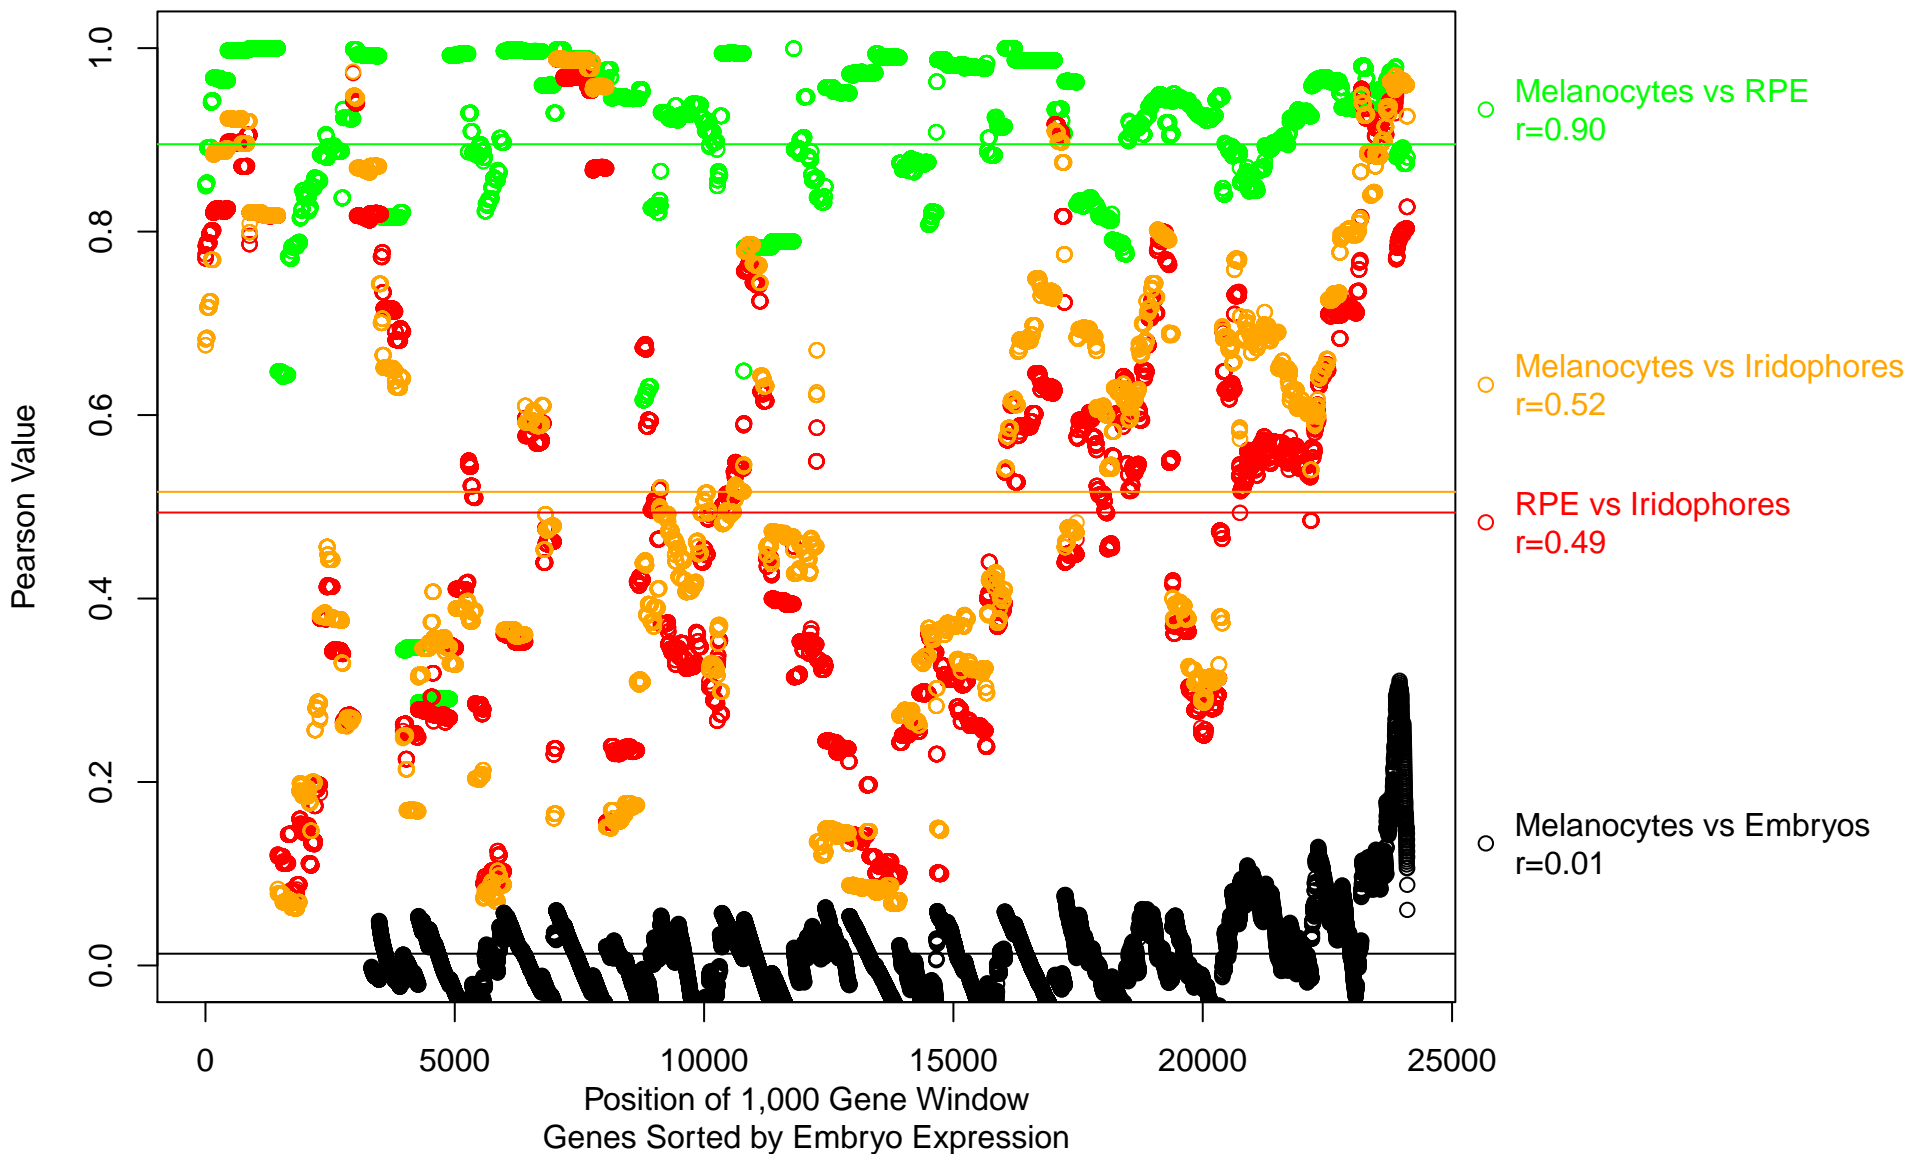

Supplement: pone.0067801.s006.pdf [file pone.0067801.s006.pdf]
