# Supplementary material for: Gene Expression Analysis of Zebrafish Melanocytes, Iridophores, and Retinal Pigmented Epithelium Reveals Indicators of Biological Function and Developmental Origin
Source: PLoS One. 2013 Jul 9;8(7):e67801. doi: 10.1371/journal.pone.0067801 (PMC3706446; doi:10.1371/journal.pone.0067801)
Supplement: Table S2 — All Libraries RPKM. Normalized expression values (RPKM) for each of the libraries used in this analysis. (XLS) [file pone.0067801.s009.xls]

## Sheet: Sheet1
Gene Identifier	Mel_1_58hpf	Mel_2_58hpf	Mel_3_77hpf	Mel_4_77hpf	Mel_5_77hpf	Mel_6_77hpf	Mel_7_77hpf	Mel_8_77hpf	Mel_9_77hpf	Mel_10_97hpf	Mel_11_116hpf	Irid_1_58hpf	Irid_2_77hpf	Irid_3_77hpf	Irid_4_77hpf	Irid_5_97hpf	RPE_1_77hpf_25C	RPE_2_77hpf_25C	RPE_3_86hpf_32C	RPE_4_86hpf_32C	RPE_5_143hpf_32C	3dpf_Embryos
gi|100818613|ref|NM_001040685.1| Danio rerio disabled homolog 1a (Drosophila) (dab1a), mRNA	0	0.154	0.008	0	0.1	0.01825	0.127	0	0	0.157	0	0	0	0	0	0	0	0.41	0.226	0.709	0.085	0.341667
gi|100818633|ref|NM_001018145.1| Danio rerio nephrosis 2, idiopathic, steroid-resistant (podocin) (nphs2), mRNA	0	0	0.0375	0.131	0.277	0.102	0	0	0.137	0	0.304	0	0	0	0	0	0	0	0	0	0.0665	0.0386667
gi|100818643|ref|NM_001040687.1| Danio rerio nephrosis 1, congenital, Finnish type (nephrin)-like (nphs1l), mRNA	0.09	0.219	0	0.421	1.2175	0.214	0.03	1.589	0.196	0.167	0.437	0	0	0	0	0	0.146	0.679	0	0	0	0
gi|103471980|ref|NM_200132.2| Danio rerio sodium channel, voltage-gated, type I, alpha (scn1a), mRNA	0	0.105	0.01825	0	0	0	0	0	0	0.072	0	0	0	0	0	0	0.031	0	0	0	0.039	0.208333
gi|103472124|ref|NM_001031841.2| Danio rerio G-protein-coupled receptor kinase 7a (grk7a), mRNA	0	0.458	0.07825	0.196	0.0345	0.1425	0.108	0	0.176	0.067	0.131	0	0.108	0.125	0.896	0	0.176	0.407	0	0	0	0.318333
gi|108796071|ref|NM_130984.2| Danio rerio twist1a (twist1a), mRNA	29.178	1.613	0.107	0	1.825	0	0.884	0	0.644	1.097	0	0	2.076	0	0	0	0.16	0	25.4415	16.4715	0	0
gi|109254762|ref|NM_130935.2| Danio rerio nuclear oncoprotein skia (skia), mRNA	1.814	1.671	1.45375	0.99	1.6505	1.5005	1.759	0.972	1.591	1.705	1.536	0.086	0.885	0.809	0.343	0.662	0.896	2.462	3.47	0.1795	2.77	1.53967
gi|109254764|ref|NM_153654.2| Danio rerio pbx/knotted 1 homeobox 2 (pknox2), mRNA	1.968	0.478	0.082	0.1375	0.4355	0.019	0.35	0	0.143	0.081	0.159	0.409	0.528	0.813	0.545	0.287	1.711	1.486	0.0355	0.8385	0	1.06067
gi|109254765|ref|NM_131015.2| Danio rerio v-maf musculoaponeurotic fibrosarcoma oncogene family, protein B (avian) (mafba), mRNA	1.159	0.576	0.437	0.192	0.583	0.13225	1.229	0.124	0.058	0.327	0.064	0.575	0.636	1.47	1.205	0.115	0.114	1.137	0.1475	0.264	0.324	2.414
gi|109254766|ref|NM_001024627.2| Danio rerio parathyroid hormone-like hormone (pthlh), mRNA	0	0.163	0	0	0	0	0	0	0	0	0	0	0.539	0.727	0	0.88	0	0	0.0365	0	0.213	0.274667
gi|109254768|ref|NM_001030110.2| Danio rerio si:dkeyp-89c11.2 (si:dkeyp-89c11.2), mRNA	0	1.669	1.45525	3.6255	1.9915	1.36425	2.099	2.665	0.882	1.002	4.219	1.008	0.325	0.063	1.008	0.354	0.79	1.046	1.5455	0	1.859	3.604
gi|109254770|ref|NM_001024653.2| Danio rerio kinase insert domain receptor (a type III receptor tyrosine kinase) (kdr), mRNA	0	0.154	0.068	0.148	0	0.009	0.042	0	0.035	0.275	0.192	0.049	0	0	0.066	0	0.034	0.239	0.026	0	0	0.415
gi|109254775|ref|NM_001007120.2| Danio rerio homeodomain leucine zipper gene (homez), mRNA	2.5	12.574	3.49375	5.336	8.182	6.44175	12.042	5.492	3.536	9.515	6.074	0.443	3.659	3.038	0.473	3.483	10.93	2.269	17.5095	5.9505	15.062	15.5667
gi|109639156|ref|NM_182864.2| Danio rerio kelch-like ECH-associated protein 1a (keap1a), mRNA	4.464	13.924	12.386	6.379	14.0005	13.829	40.354	58.561	18.917	42.178	50.226	3.573	4.255	5.644	3.419	13.756	7.787	27.947	18.0365	13.106	27.3605	0.962333
gi|109639158|ref|NM_001030181.2| Danio rerio si:ch211-237l4.5 (si:ch211-237l4.5), mRNA	1.715	0.313	0.24925	0.312	0.7305	0.05975	0.686	0	0.094	0.957	0.104	4.147	8.11	17.012	16.402	27.593	0.839	1.943	7.436	0.7005	0.346	7.339
gi|110005800|ref|NM_001017903.2| Danio rerio epiphycan (epyc), mRNA	3.96	0.926	0.50875	0	0	0	0.761	0	0.083	0.378	0	0	0	0.118	1.9	0.167	0.414	1.397	3.2165	1.335	0.0405	0.0303333
gi|110350665|ref|NM_001002533.2| Danio rerio RAB11 family interacting protein 4 (class II) a (rab11fip4a), mRNA	0.759	0	0	0.5145	0.216	0.166	0.708	0	0.083	0	0	0	0	0	0	0	0.165	1.473	0.798	1.6895	0.1635	0.667667
gi|110626116|ref|NM_001030152.2| Danio rerio si:ch211-240l19.5 (si:ch211-240l19.5), mRNA	0	0.374	0.07775	0	0.098	0.04425	0.102	0.362	0	1.906	1.306	2.157	2.473	3.572	6.069	4.036	0.334	0.332	0.5965	0	0.788	14.4227
gi|110626132|ref|NM_001030280.1| Danio rerio solute carrier family 24, member 5 (slc24a5), mRNA	35.735	46.228	99.3975	22.3225	262.31	143.695	47.123	119.367	47.34	54.092	44.335	0.132	3.749	0.984	0.88	2.039	42.239	16.356	63.864	18.394	32.544	0
gi|110626134|ref|NM_001024073.1| Danio rerio calponin 3, acidic b (cnn3b), mRNA	1.544	0.626	0.3725	0.4915	2.1885	0.292	0.4	2.021	0.187	1.383	0.833	0.936	1.726	1.794	2.318	4.693	3.262	0.925	0.2165	0.1415	0.185	14.9963
gi|110626136|ref|NM_001018125.1| Danio rerio crystallin, beta A4 (cryba4), mRNA	659.35	24.645	1.254	0	1.2585	0.14625	8.229	0	0	0	0	6.179	0	0.361	0.484	0	38.739	5.279	5.01	0.338	0	16.5837
gi|110626144|ref|NM_001005777.1| Danio rerio apolipoprotein O, b (apoob), mRNA	0	0.286	0.05575	0	0	0.06775	0.235	0	0.257	0.291	0.571	1.283	0	0.273	0	0	0	0.127	0.424	0	0.22	0.297333
gi|110626148|ref|NM_131220.1| Danio rerio myc-associated factor X (max), mRNA	20.947	40.682	24.1973	33.3725	24.9185	34.082	30.206	40.2	40.177	22.188	20.604	39.617	65.841	60.836	25.243	37.128	29.512	25.003	29.572	14.3975	23.6505	20.6247
gi|110626150|ref|NM_131237.1| Danio rerio max interacting protein (mxi1), mRNA	12.472	6.445	8.61925	2.449	19.019	2.652	10.182	11.024	2.383	11.795	10.984	4.378	8.784	4.712	7.779	8.531	3.897	6.729	19.225	16.593	15.789	1.191
gi|110626152|ref|NM_131399.1| Danio rerio retinoic acid receptor, alpha b (rarab), mRNA	0.243	1.328	0.964	0.8235	0.804	1.052	1.092	2.575	0.994	1.581	1.474	1.325	0.611	0.658	0	1.063	1.319	3.078	0.7255	0.456	1.772	6.60667
gi|110626154|ref|NM_131412.1| Danio rerio myelocytomatosis oncogene a (myca), mRNA	5.808	3.09	2.1255	0.665	2.6665	1.1775	6.23	4.92	1.189	6.416	6.945	0	2.009	3.868	4.151	2.582	1.578	5.582	8.732	4.8385	3.972	0.914667
gi|110626156|ref|NM_131667.1| Danio rerio GTP cyclohydrolase 2 (gch2), mRNA	8.318	40.673	6.3035	40.7335	72.3145	29.9862	54.712	163.252	34.058	80.631	65.788	2.116	1.638	1.822	1.128	1.187	9.334	25.365	4.478	2.449	7.4445	2.32367
gi|110626158|ref|NM_131431.1| Danio rerio fatty acid binding protein 2, intestinal (fabp2), mRNA	11.045	1.279	0.51975	0	9.2075	4.90975	0.701	3.099	5.455	0.652	1.917	0	0	2.853	1.093	0.576	376.654	8.796	3.3685	16.6375	8.57	252.859
gi|110626160|ref|NM_131702.1| Danio rerio SRY-box containing gene 19b (sox19b), mRNA	0.133	0.081	0	0	0	0	0.088	0	0.145	0	0	0	0	0.103	0	0.145	0	0	0	0	0	9.627
gi|110626180|ref|NM_001024098.1| Danio rerio zgc:101724 (zgc:101724), mRNA	8.582	25.802	2.173	3.3385	4.705	5.40025	29.378	34.207	4.259	21.096	26.063	8.52	8.949	20.073	20.762	18.103	5.342	17.258	10.133	7.26	4.824	27.5267
gi|110626182|ref|NM_001007175.1| Danio rerio scribbled homolog (Drosophila) (scrib), mRNA	1.901	1.315	1.055	0.701	2.5385	1.11825	0.852	1.545	0.537	1.626	2.15	0.92	1.649	1.727	1.295	1.865	1.532	1.344	0.935	0.9655	0.913	4.23667
gi|110836625|ref|NM_153672.2| Danio rerio twisted gastrulation homolog 1b (Drosophila) (twsg1b), mRNA	10.338	1.754	1.52275	4.832	2.8105	2.59925	1.843	0.567	1.969	0.745	0.876	3.375	2.419	2.422	1.999	1.316	16.068	3.243	10.0735	29.93	6.2855	2.33767
gi|111548670|ref|NM_001042686.1| Danio rerio heat shock protein 12B (hspa12b), mRNA	1.294	1.502	0.925	0.8595	1.503	1.4275	3.724	0.97	1.413	3.137	1.286	1.193	0	0.091	0	0.129	1.278	4.188	6.207	2.6045	3.26	0.0676667
gi|111548673|ref|NM_001042684.1| Danio rerio cholinergic receptor, nicotinic, alpha 6 (chrna6), mRNA	0	0.106	0.02625	0.0915	0	0.071	0.175	0	0.095	0.434	0.956	0	0	0	0.182	0.191	0	0.755	0.146	0.4555	0.1885	0
gi|111548681|ref|NM_001042691.1| Danio rerio LIM domain kinase 1 (limk1), mRNA	0.503	0.509	0.3305	0.305	0.5565	0.9205	0.614	0.592	0.64	0.623	0.61	0	0	0	0	0.183	0.455	0.723	0	0	1.2825	0.314
gi|111607485|ref|NM_001042695.1| Danio rerio caspase 2, apoptosis-related cysteine protease (casp2), mRNA	0	0.158	0.05525	0.136	0.0825	0.2815	0.346	0.306	0.142	0.804	0.158	0	0	0.301	0	0	0	0	0.901	0	0	4.051
gi|111607487|ref|NM_001042713.1| Danio rerio tumor necrosis factor (ligand) superfamily, member 10 like 3 (tnfsf10l3), mRNA	0	0.237	0.73275	0.204	0	0	0.39	0	0	0	0	0	0	0	0	0	0	0	4.1845	0	1.413	0.236667
gi|111955340|ref|NM_001042720.1| Danio rerio ATPase, Cu++ transporting, alpha polypeptide (atp7a), mRNA	1.83	0.695	1.896	1.0325	2.203	3.66025	0.838	2.516	1.124	0.757	0.834	1.071	2.532	0.502	1.665	0.501	0.207	0.535	1.838	0.3565	0.702	1.12933
gi|111955345|ref|NM_001042722.1| Danio rerio potassium voltage-gated channel, subfamily H (eag-related), member 2 like (kcnh2l), mRNA	0.18	0	0	0	0	0	0	0	0	0.224	0	0	0	0	0.094	0	0	0	0.0125	0	0	0.018
gi|111955350|ref|NM_001042718.1| Danio rerio PDZ and LIM domain 3b (pdlim3b), mRNA	0	0	0	0	0	0.0495	0.114	0.405	0	0	0	0	0	0	0	0	0	0	0.9995	4.4695	0	0.353333
gi|111955356|ref|NM_001042721.1| Danio rerio solute carrier family 2 (facilitated glucose transporter), member 2 (slc2a2), mRNA	0	0.076	0.0295	0	0	0.039	0.125	0	0	0.155	0	0	0.251	0	0	0	0.135	0.202	0	0.0905	0.033	3.944
gi|112293296|ref|NM_001042730.1| Danio rerio transient receptor potential cation channel, subfamily V, member 4 (trpv4), mRNA	0.129	0	0	0	0	0	0.043	0	0	0	0	0.906	0.13	0.05	1.208	0	0	0	0.253	0	0.0865	1.189
gi|112293300|ref|NM_001042735.1| Danio rerio c11orf2 homolog (H. sapiens) (c11orf2), mRNA	1.229	2.574	3.556	2.2815	5.543	3.73825	4.687	9.818	2.386	4.828	5.723	3.728	2.611	4.657	0.852	5.082	2.078	5.968	4.2885	1.1655	4.152	2.989
gi|112293304|ref|NM_001042731.1| Danio rerio histamine receptor H1 (hrh1), mRNA	0	0	0	0	0	0.1165	0	0	0	0	0	0	0	0	0	0	0	0	0	0	0	0
gi|112363125|ref|NM_001042745.1| Danio rerio dynein, cytoplasmic 1, heavy chain 1 (dync1h1), mRNA	30.008	23.447	39.815	20.913	95.1515	97.0815	25.385	36.608	33.366	38.882	39.765	23.612	22.375	30.889	17.573	25.752	21.126	12.333	50.3425	28.0485	19.299	3.681
gi|112363127|ref|NM_001042753.1| Danio rerio leucine-rich repeat, immunoglobulin-like and transmembrane domains 1b (lrit1b), mRNA	1.447	1.759	2.88375	0.7545	1.829	1.267	0.92	0.93	0.862	1.958	0.399	0	0.397	0.153	0	0.432	5.217	13.838	5.494	3.355	2.5225	1.42667
gi|112363129|ref|NM_001042754.1| Danio rerio zgc:136338 (zgc:136338), mRNA	0	0	0	0	0	0	0	0	0	0	0.268	0	0	0	0	0	0	0	0	0	0.1795	1.22233
gi|112363131|ref|NM_001042748.1| Danio rerio retinoblastoma binding protein 9 (rbbp9), mRNA	4.149	3.561	1.5825	11.2095	2.7295	12.0095	2.521	8.342	6.795	2.724	2.223	0	2.456	3.026	1.015	3.205	2.785	0.263	7.739	4.5355	3.4125	10.9387
gi|112421210|ref|NM_001042775.1| Danio rerio ATP-binding cassette, sub-family G (WHITE), member 2a (abcg2a), mRNA	12.115	2.348	1.35425	0.092	3.8485	0.81875	5.968	1.242	0.383	7.078	1.386	18.078	2.297	0.272	0	1.153	19.463	2.463	11.6365	19.024	3.442	5.56133
gi|112421212|ref|NM_001042772.1| Danio rerio ATP-binding cassette, sub-family G (WHITE), member 2d (abcg2d), mRNA	30.387	21.608	60.517	23.5575	49.6475	17.5478	61.92	21.272	16.187	46.713	32.551	0	1.853	1.213	0.191	4.636	28.219	34.974	106.331	21.8715	52.6535	0
gi|112421217|ref|NM_001042769.1| Danio rerio polymerase (DNA-directed), delta 3, accessory subunit (pold3), mRNA	0	1.12	0.4075	0.5395	1.305	0.58975	2.379	0.814	0.377	3.285	0.839	2.515	1.622	1.963	5.506	4.537	0.25	3.727	1.529	0.7285	0.3095	16.6167
gi|112807173|ref|NM_131843.2| Danio rerio tumor necrosis factor (ligand) superfamily, member 10 like (tnfsf10l), mRNA	0.503	1.836	1.8545	0.066	0.973	0.31575	1.09	0.445	0.893	1.014	1.528	0.098	0	0.098	0.131	0.275	7.316	0.543	2.442	0.307	4.0455	0.315
gi|112807177|ref|NM_200463.2| Danio rerio transmembrane protein 57b (tmem57b), mRNA	2.05	0.914	2.19275	1.5675	0.3465	1.1495	1.184	1.772	1.268	0.932	0.996	0.746	1.375	2.118	0.284	0.598	1.411	6.489	0.817	0.59	1.628	2.81033
gi|112807231|ref|NM_001043319.1| Danio rerio six-cysteine containing astacin protease 1 (c6ast1), mRNA	0	0	0	0	0	0	0	0.511	0	0	0	0	1.744	0	0	0	0	0	0	0	0	1.21633
gi|112807235|ref|NM_001043321.1| Danio rerio macrophage migration inhibitory factor (mif), mRNA	1.634	9.931	3.5205	0.8555	4.976	3.36625	11.249	7.059	2.081	38.159	12.898	14.016	2.739	13.925	23.773	20.859	6.805	11.457	4.9775	3.8575	2.329	10.189
gi|112807239|ref|NM_001043324.1| Danio rerio parathyroid hormone-related peptide 2 (pthrp2), mRNA	0	0	0	0	0	0	0	0	0	0	0	0	0	0	0	0	0	0	0	0	0	0
gi|112807243|ref|NM_001043323.1| Danio rerio H2A histone family, member V, like (h2afvl), mRNA	860.779	489.185	284.139	193.566	584.519	193.522	526.055	677.729	317.758	347.915	216.157	361.001	252.248	348.47	273.361	301.249	200.996	117.284	575.11	138.732	165.71	34.349
gi|112807245|ref|NM_001043333.1| Danio rerio naked cuticle homolog 1 (Drosophila) (nkd1), mRNA	1.16	0.423	0.33925	0.544	0.222	0	0.696	1.094	0.253	0.432	0.564	0	0	0	0	0	0	0	0.932	0	0.529	0.938667
gi|112807247|ref|NM_001043325.1| Danio rerio lysyl oxidase-like 1 (loxl1), mRNA	2.539	0.475	0.9885	0.716	2.008	1.4325	2.733	1.151	0.853	3.755	1.068	0	0.197	0	0	0.214	1.061	1.897	4.6615	5.348	1.6705	0.0916667
gi|112807249|ref|NM_001043334.1| Danio rerio erythropoietin receptor (epor), mRNA	1.552	1.348	0.6865	0.807	0.699	0.032	1.108	0.523	0.242	1.513	1.347	0	0	0	0	0	1.325	3.589	2.005	4.734	0.2705	0.0146667
gi|112817608|ref|NM_001030117.2| Danio rerio si:ch211-171o19.1 (si:ch211-171o19.1), mRNA	0	0	0.034	0	0	0.0195	0	0	0.147	0	0	0.105	0	0	0	0	0.073	0	0	0	0	0.118
gi|112817610|ref|NR_003147.1| Danio rerio granulin antisense (grnas), antisense RNA	5.287	11.198	6.085	6.6725	6.247	3.02825	17.277	21.509	13.408	22.106	26.83	11.973	16.474	19.429	23.225	20.72	11.955	22.728	11.2205	6.03	15.677	4.28967
gi|112821693|ref|NM_001043350.1| Danio rerio receptor (TNFRSF)-interacting serine-threonine kinase 1, like (ripk1l), mRNA	0.476	0	0.0275	0	0	0.16	0	0	0	0	0.193	0.248	0	0.307	0	0	0	0.086	0	0	0	0.354667
gi|112982793|ref|NM_131262.2| Danio rerio myogenic differentiation 1 (myod1), mRNA	0	0	0	0	0.0905	0	0.257	0	0	0.478	0.585	0	0	0.298	0	0	0.314	0.208	0.3175	0	0.2825	1.62933
gi|113195543|ref|NM_001044315.1| Danio rerio DEAD (Asp-Glu-Ala-Asp) box polypeptide 52 (ddx52), mRNA	11.401	6.398	1.17325	1.373	3.6005	3.14575	6.897	7.649	2.969	6.309	3.196	8.072	0.882	2.99	1.094	2.88	1.144	1.514	6.519	2.925	1.1005	16.26
gi|113195545|ref|NM_001044316.1| Danio rerio si:dkey-220f10.6 (si:dkey-220f10.6), mRNA	0	0.099	0	0.0425	0.104	0.0255	0.136	0.096	0	0.051	0.446	0	0	0.032	0.593	0	0	0.044	0	0	0.076	3.601
gi|113195549|ref|NM_001044318.1| Danio rerio guanine nucleotide binding protein (G protein), gamma 2 (gng2), mRNA	5.682	2.073	0.84375	0.666	0.5385	0.3205	1.704	0.335	1.241	2.819	1.726	0.443	1.429	2.972	2.067	2.488	2.161	0.92	4.185	2.6215	2.9785	0.825
gi|113195551|ref|NM_001044311.1| Danio rerio taxilin gamma (txlng), mRNA	0	0.223	0.02325	0	0.344	0.13675	0.488	0	0.1	0.114	0.334	0.571	0	0.497	0.19	0.401	0.1	0.099	0	0	0.097	3.31533
gi|113195555|ref|NM_001044317.1| Danio rerio transmembrane protein 161A (tmem161a), mRNA	0	0.529	0.36425	0.114	0.2405	0.413	0.725	0.513	0.237	0.944	0.264	0.339	0	0.337	0	0.952	0.236	1.173	0.941	0.6165	0.465	2.19967
gi|113195557|ref|NM_001044321.1| Danio rerio peptidoglycan recognition protein 5 (pglyrp5), mRNA	0	0	0	0	0	0	0	0	0	0.345	0.507	15.411	0	0	0	0	0	0	0	1.4675	0.074	0
gi|113195559|ref|NM_001044348.1| Danio rerio junctophilin 1b (jph1b), mRNA	0	0	0.00775	0.2215	0.057	0	0.081	0	0	0	0	0	0	0	0	0	0.066	0.919	0.17	0	0	3.732
gi|113195561|ref|NM_001044344.1| Danio rerio wingless-type MMTV integration site family, member 2Bb (wnt2bb), mRNA	0	0	0.03025	0	0	0	0.16	0.283	0	0.596	0	0	0	0	0	0	0	0	0.0325	0	0.1275	0
gi|113195563|ref|NM_001044326.1| Danio rerio zinc finger, MYND domain containing 11 (zmynd11), transcript variant 1, mRNA	0.278	0.169	0.25725	0	0.0445	0.06375	0.325	0.164	0	0.518	1.015	0	0.56	0.162	1.302	0.762	0.454	2.779	0.2535	0.2475	0.95	1.96833
gi|113195567|ref|NM_001044343.1| Danio rerio procollagen-lysine, 2-oxoglutarate 5-dioxygenase 3 (plod3), mRNA	6.197	17.072	4.0235	32.267	5.5935	16.9322	26.008	15.539	6.334	13.655	6.566	18.716	3.316	4.7	3.7	3.175	2.436	3.841	9.9	6.0435	3.081	1.70067
gi|113195569|ref|NM_001044325.1| Danio rerio zgc:136652 (zgc:136652), mRNA	0.126	0.038	0.0345	0.066	0.0295	0.038	0.336	0	0.138	0.039	0.077	0	0.254	0.317	0.131	0.345	0.205	0.442	0.1225	0.0415	0.321	2.697
gi|113195571|ref|NM_001044353.1| Danio rerio lipin 1 (lpin1), mRNA	0.253	6.836	2.2125	1.5185	2.873	2.615	10.188	1.936	2.345	10.813	15.117	0.099	1.144	0.392	3.677	5.946	3.501	5.385	4.3325	3.4055	8.9035	0.275
gi|113195573|ref|NM_001044333.1| Danio rerio si:ch211-67n3.1 (si:ch211-67n3.1), mRNA	0.226	0.137	0.1375	0.1185	0.159	0.2365	0.264	0.266	0.617	0.42	0.686	0.088	0.682	0.306	0.705	0.247	0.798	0.427	0.092	0.037	0.1955	1.03233
gi|113195575|ref|NM_001044319.1| Danio rerio zinc finger protein 296 (znf296), mRNA	3.221	0.058	0.0855	0	0	0	0.095	0	0	0.059	0	0	0	0	0	0	0.103	0.051	1.3785	0	0	1.77767
gi|113195579|ref|NM_001044312.1| Danio rerio si:ch211-173p18.1 (si:ch211-173p18.1), mRNA	2.374	0.316	1.414	0.4255	0.3985	0.69925	0.445	0.525	0.365	1.012	0.586	3.183	13.289	3.364	3.471	1.299	0.363	1.401	1.352	1.973	1.3655	5.743
gi|113195583|ref|NM_001044328.1| Danio rerio N-ethylmaleimide-sensitive factor a (nsfa), mRNA	49.404	3.819	3.58675	1.808	0.3875	0.98675	11.176	0.753	1.104	9.707	1.358	0.083	1.5	2.352	9.076	5.128	19.729	80.48	20.0155	9.259	3.506	0.87
gi|113195587|ref|NM_001044329.1| Danio rerio CLK4-associating serine/arginine rich protein (clasrp), mRNA	3.567	3.739	1.5405	0.963	3.9005	1.772	5.328	5.219	1.343	6.102	4.557	0.863	1.485	1.906	4.347	4.173	2.74	1.924	5.242	6.027	3.431	3.42033
gi|113195591|ref|NM_001044332.1| Danio rerio si:dkeyp-114g9.1 (si:dkeyp-114g9.1), mRNA	0	0	0	0	0	0	0	0	0	0	0	0	0.979	0.566	0	0.355	0	0	0	0	0	8.63533
gi|113195593|ref|NM_001044327.1| Danio rerio zgc:101130 (zgc:101130), mRNA	0	2.524	0.06575	0.1085	0.857	0.40825	2.145	2.202	0.113	2.318	1.765	0	1.462	1.931	1.295	0.909	1.918	1.456	0.141	0.034	1.0015	0.765667
gi|113195597|ref|NM_001044330.1| Danio rerio si:dkeyp-59c12.1 (si:dkeyp-59c12.1), mRNA	0	0.326	0.127	0	0	0.168	0.357	0.632	0.293	1.994	0.651	0	0	0	0	0	0.582	2.024	0.2285	0	0.218	0
gi|113195599|ref|NM_001044337.1| Danio rerio si:dkey-264p5.1 (si:dkey-264p5.1), mRNA	0	0	0	0	0.18	0.13325	0	0.452	0	0.238	0	0	0	0	0	0	0	0	0	0	0	0
gi|113195605|ref|NM_001044335.1| Danio rerio si:ch211-198o12.4 (si:ch211-198o12.4), mRNA	0	0	0.06125	0	0	0	0	0	0	0	0	0	0	0	0	0	0	0	0	0	0	0
gi|113195619|ref|NM_001044347.1| Danio rerio si:ch211-238n5.4 (si:ch211-238n5.4), mRNA	1.151	0.28	0.98625	0.4825	0.475	0.51	0.691	1.9	0.126	0.714	0.839	0.18	0	0.357	1.197	0.756	0.125	0	0	0.205	0.8345	0.397
gi|113195625|ref|NM_001044346.1| Danio rerio thyrotropin releasing hormone receptor 2 (trhr2), mRNA	0	0	0	0	0	0	0	0	0	0	0	0	0	0	0	0	0	0	0.031	0	0	0.005
gi|113195627|ref|NM_001044352.1| Danio rerio WD repeat domain 69 (wdr69), mRNA	0.391	0	0.01225	0	0	0	0.196	0	0	0	0	0	0	0	0	0	0	0	0.4365	0	0	0.054
gi|113195629|ref|NM_001044323.1| Danio rerio zgc:152753 (zgc:152753), mRNA	0	0	0	0	0	0	0	0	0	0	0	0	0	0	0	0	0	0	0	0	0	0
gi|113195697|ref|NM_001044307.1| Danio rerio dual specificity phosphatase 3 (vaccinia virus phosphatase VH1-related) (dusp3), mRNA	0	0	0	0	0	0	0	0	0	0	0	0	0	0	0	0	0	0	0	0	0	0
gi|113205046|ref|NM_001044395.1| Danio rerio TAF9 RNA polymerase II, TATA box binding protein (TBP)-associated factor (taf9), mRNA	53.497	27.447	24.3547	8.1505	27.6425	30.2767	33.901	27.699	6.753	27.041	24.041	38.11	22.714	29.715	46.611	30.461	17.139	9.676	47.645	22.3055	29.7565	18.2817
gi|113205489|ref|NM_131033.1| Danio rerio nipsnap1 (nipsnap1), mRNA	0	0	0	0	0.073	0	0	0	0	0	0	0	0	0	0	0	0.373	0	0	0	0	2.04867
gi|113205491|ref|NM_131535.1| Danio rerio homeo box A4a (hoxa4a), mRNA	0	1.359	0.1115	0.26	4.464	3.9315	0.745	3.22	1.491	0.77	1.207	1.162	5.247	6.639	0.516	8.154	0.945	0.134	0.2745	0	0	0.00533333
gi|113205949|ref|NM_130979.2| Danio rerio dharma (dharma), mRNA	0	0.247	0.17975	0	0	0	1.083	0	0	0	0	0.317	0	3.148	4.223	0	0.221	2.192	0	0	0	0
gi|113205952|ref|NM_001002315.2| Danio rerio cerebral cavernous malformation 2 (ccm2), mRNA	1.326	0.672	0.40975	0.518	0.593	1.115	0.368	0.26	0.362	1.233	3.087	0.517	1.334	0.599	0.919	0.242	0.24	0	1.964	0	5.031	0.227333
gi|113205956|ref|NM_001039826.2| Danio rerio canopy 2 (cnpy2), mRNA	0	0.597	0.29475	1.1105	0.258	0.9245	1.2	0	0.715	0	0	0	0.329	0.381	0	0	0.178	0.177	0.674	0	0.22	7.22467
gi|113205960|ref|NM_001039497.2| Danio rerio canopy1 (cnpy1), mRNA	7.44	17.088	2.73325	4.0955	3.8315	4.14325	8.081	8.445	18.354	4.785	4.184	5.374	2.218	3.951	0	4.223	4.193	1.338	4.022	2.5335	2.8785	8.34233
gi|113374120|ref|NM_001044712.1| Danio rerio fatty acid binding protein 1a, liver (fabp1a), mRNA	0	0.504	0	0	0	0.13	0	0.488	0	1.284	8.05	0	0	0	0	0	0	0.223	0	0	24.1225	1.01667
gi|113374128|ref|NM_001044707.1| Danio rerio solute carrier family 19, member 3 (slc19a3), mRNA	0.238	0	0	0	0	0	0	0	0	0	0	0	0	0	0	0	0	0	0	0	0	0.313
gi|113374130|ref|NM_001044710.1| Danio rerio si:dkeyp-87e7.4 (si:dkeyp-87e7.4), mRNA	14.899	13.392	11.8488	3.7535	13.9065	1.218	17.312	33.018	3.545	15.399	19.413	8.939	18.706	25.41	20.12	33.17	8.787	7.695	11.388	6.0925	11.853	4.352
gi|113374132|ref|NM_001044708.1| Danio rerio si:dkey-103i16.6 (si:dkey-103i16.6), nuclear gene encoding mitochondrial protein, mRNA	0	0	0	0	0.167	0	0.174	0	0	0	0	0	0	0.101	0	0	0	0	0	0	0.2775	3.02433
gi|113374134|ref|NM_001044711.1| Danio rerio zgc:136778 (zgc:136778), mRNA	0	0	0	0	0	0	0	0	0	0	0	0	0	0	0	0	0	0	0	0	0.049	0.0123333
gi|113462012|ref|NM_001025488.1| Danio rerio si:dkey-185l3.3 (si:dkey-185l3.3), mRNA	0	0	0	0	0	0	0	0	0	0	0	0	0	0	0	0	0	0	0	0	0	1.61233
gi|113462024|ref|NM_001030176.1| Danio rerio ectonucleotide pyrophosphatase/phosphodiesterase 5 (enpp5), mRNA	0	0	0	0	0	0	0	0	0	0	0.145	0	0	0	0	0	0	0	0	0	0.063	0.0976667
gi|113671063|ref|NM_001045302.1| Danio rerio microsomal glutathione S-transferase 2 (mgst2), mRNA	2.186	4.43	2.018	0.8545	2.6325	1.1615	3.157	3.865	3.978	6.101	2.434	3.979	1.833	1.694	0	1.196	4.356	5.111	2.39	0.8765	4.2125	9.06833
gi|113671157|ref|NM_001044849.1| Danio rerio olfactomedin-like 2Ba (olfml2ba), mRNA	0	0.078	0.12725	0	0	0.052	0.085	0	0	0	0	0	0	0	0	0	0	0	0.2685	0	0	0.0903333
gi|113671247|ref|NM_001045305.1| Danio rerio tubulin tyrosine ligase-like family, member 3 (ttll3), mRNA	0	0	0	0	0	0	0	0	0	0	0	0	0	0	0	0	0	0.072	0	0	0	0.162333
gi|113671292|ref|NM_001045303.1| Danio rerio zgc:136894 (zgc:136894), mRNA	0.379	0.346	0.0495	0	0	0	0.19	0.447	0	0.235	0	0.148	0	0.441	0.394	0	0.309	0.512	0	0	0	0.00433333
gi|113671295|ref|NM_001045306.1| Danio rerio DnaJ (Hsp40) homolog, subfamily C, member 8 (dnajc8), mRNA	228.671	65.104	49.8092	62.762	131.507	115.695	73.26	65.337	99.392	59.969	30.61	78.863	52.927	41.129	42.565	51.366	64.694	39.935	200.226	84.434	40.4695	7.61767
gi|113671353|ref|NM_001045310.1| Danio rerio zgc:136572 (zgc:136572), mRNA	1.496	1.251	1.9485	1.753	0.7995	1.59025	2.368	1.763	1.123	2.088	1.136	2.917	0.941	1.377	0.389	0.819	0.915	2.22	2.2865	0.0615	1.025	4.21467
gi|113671416|ref|NM_001045307.1| Danio rerio zgc:136367 (zgc:136367), mRNA	0.285	1.387	0.73175	0.743	1.014	1.336	1.711	0.84	0.311	1.238	0.606	0.779	0.43	2.044	0.889	0.468	1.395	0.308	1.115	2.307	0.761	4.544
gi|113671419|ref|NM_001045309.1| Danio rerio zgc:136406 (zgc:136406), mRNA	1.74	0.212	0.426	0	0.1635	0.3275	0.58	0	2.469	0.647	1.268	0.543	3.501	0	0.723	1.142	3.403	0.939	0.79	0.4245	8.392	3.997
gi|113671511|ref|NM_001045308.1| Danio rerio zgc:136474 (zgc:136474), mRNA	407.434	282.976	328.337	294.187	113.321	282.128	443.878	287.752	388.524	236.712	80.524	329.954	304.287	267.694	316.481	267.957	190.83	218.6	114.04	130.389	231.674	23.3
gi|113671513|ref|NM_001045312.1| Danio rerio stimulated by retinoic acid gene 6 homolog (mouse) (stra6), mRNA	181.667	827.52	703.601	910.179	433.368	923.008	947.696	465.014	803.801	869.036	669.051	14.079	76.632	31.405	4.479	37.473	475.147	575.194	326.059	207.185	1112.16	3.00067
gi|113671558|ref|NM_001045311.1| Danio rerio mannoside acetylglucosaminyltransferase 5 (mgat5), mRNA	0.561	0.758	0.74375	0.0655	0.7675	1.04725	0.623	1.764	0.477	1.392	1.591	0.292	0.126	0.193	0.13	0.751	0.237	0.269	0.442	0.0865	0.9635	7.27767
gi|113671560|ref|NM_001045315.1| Danio rerio zgc:136759 (zgc:136759), mRNA	0.303	0.061	0.07875	0.342	0.1285	0.0495	0.235	0.119	0	0.313	0	0.472	0.507	0.508	1.363	1.214	0.11	0.87	0	0.6615	0.809	0.713667
gi|113671598|ref|NM_001045316.1| Danio rerio family with sequence similarity 102, member B, a (fam102ba), mRNA	0	0	0	0.0845	0.103	0	0.054	0.191	0.088	0.201	0.098	0	0	0	0	0	0	0	0	0	0	0.782333
gi|113671628|ref|NM_001045314.1| Danio rerio solute carrier family 25, member 47a (slc25a47a), mRNA	0.564	3.317	0.65425	0.0495	0.475	0.1945	2.633	2.994	0.565	4.726	4	0.734	0.189	0.875	1.565	1.339	1.329	2.233	1.156	0.2325	1.6625	3.12167
gi|113671671|ref|NM_001045319.1| Danio rerio zgc:136380 (zgc:136380), transcript variant 2, mRNA	3.981	3.577	2.80425	4.294	2.848	1.59225	2.999	3.876	7.843	1.395	0.631	1.89	5.921	5.499	3.598	3.031	3.009	2.708	1.9585	0	1.664	0.436
gi|113671673|ref|NM_001045318.1| Danio rerio zgc:136839 (zgc:136839), mRNA	4.795	0.972	0.0675	0.3235	1.4865	0.62475	0.592	1.256	0.679	0.661	1.187	0	0.715	0.963	0	1.166	0.579	0.479	2.0125	0.1875	0.7845	0.276
gi|113671700|ref|NM_001045322.1| Danio rerio crumbs homolog 3a (crb3a), mRNA	0.137	0.665	0.1295	0	0.367	0.059	2.778	1.128	0.149	1.95	1.162	0	0.413	0.371	0	0.598	0.446	1.254	0.2835	0.045	1.3115	3.18667
gi|113671749|ref|NM_001045317.1| Danio rerio zgc:136844 (zgc:136844), mRNA	0.7	0.532	0.26525	0	0.6075	0.1155	0.845	0.618	0.143	0.868	0.903	0.341	0.352	0.915	0.364	0.287	0.238	0.708	0.5145	0.4955	0.0695	1.50367
gi|113671751|ref|NM_001045457.1| Danio rerio stanniocalcin 1 (stc1), mRNA	0.693	0.211	0.082	0	0	0	0.462	0.817	0.189	0	0.421	0	0	0	0	0	0	0	1.1025	0	0	0
gi|113671789|ref|NM_001045456.1| Danio rerio mitochondrial ribosomal protein S6 (mrps6), nuclear gene encoding mitochondrial protein, mRNA	7.623	14.772	3.27375	5.845	15.949	13.4905	9.367	8.985	9.104	8.273	2.604	5.574	11.026	7.938	2.972	4.172	24.853	16.965	15.757	7.5515	7.226	13.0973
gi|113671791|ref|NM_001045324.1| Danio rerio fibroblast growth factor 21 (fgf21), mRNA	0	0	0.07325	0	0	0	0	0	0	0	0	0	0	0	0	0	0	0	0	0	0	0
gi|113672963|ref|NM_001045443.1| Danio rerio dephospho-CoA kinase domain containing (dcakd), mRNA	0	0.362	0.09725	0.3115	0.19	0.3905	0.132	0.701	0.433	0.492	1.325	0	0.2	0.461	0	0.217	0.216	0.321	0.081	0	0.238	3.44167
gi|113672990|ref|NM_001045321.1| Danio rerio neuronal PAS domain protein 4 (npas4), mRNA	0.071	0.087	0	0.1295	0	0	0.119	0	0.078	0.132	0	0	0	0.083	0.074	0	0.077	0.499	0	0	0.1625	0.132667
gi|113673057|ref|NM_001045442.1| Danio rerio zgc:153247 (zgc:153247), mRNA	23.809	28.436	23.6238	10.881	30.2615	28.7165	25.697	9.437	19.325	22.998	9.47	11.176	12.296	17.879	6.571	13.606	14.311	9.663	36.316	5.4085	27.6155	0.289
gi|113673091|ref|NM_001045327.1| Danio rerio zgc:136330 (zgc:136330), mRNA	0	1.971	0	0	0	0	2.701	1.911	0	1.005	1.477	0.632	0	2.041	1.264	0.444	0.22	2.405	0.055	0.067	0.3295	9.90133
gi|113673223|ref|NM_001045330.1| Danio rerio premelanosome protein a (pmela), mRNA	2458.77	5177.03	6525.75	56062.8	22768.1	29871	5018.88	9869.38	17300.5	6533.35	5364.15	53.349	313.725	104.502	50.525	222.387	3046.35	2286.32	8918.45	2151.4	4818.49	0.574333
gi|113673260|ref|NM_001045331.1| Danio rerio zgc:136911 (zgc:136911), mRNA	0	0	0	0	0	0	0.144	0	0	0	0	0	0	0	0	0	0	0	0	0	0	0.00333333
gi|113673318|ref|NM_001045332.1| Danio rerio UDP-Gal:betaGlcNAc beta 1,4- galactosyltransferase, polypeptide 5 (b4galt5), mRNA	0.485	0.738	0.5175	0.4415	0.1915	0.14	1.213	1.716	0.132	0.15	1.032	0	0.244	0.376	0.504	1.062	0.132	0	0.6075	0	0.9095	0.0426667
gi|113673321|ref|NM_001045337.1| Danio rerio zgc:123181 (zgc:123181), mRNA	0	0	0	0	0	0	0	0	0	0	0	0	0	0	0	0	0	0	0	0	0	0
gi|113673369|ref|NM_001045333.1| Danio rerio potassium channel tetramerisation domain containing 7 (kctd7), mRNA	0.287	0.437	0.6105	0	0.159	0	0.192	0	0	0.624	0.262	0	0.289	0.223	0.149	0	0.312	1.473	0	0	0.038	0.432
gi|113673423|ref|NM_001045441.1| Danio rerio zgc:153650 (zgc:153650), mRNA	0	0	0	0	0	0	0	0	0	0	0	0	0	0	0	0	0	0	0	0	0	5.798
gi|113673470|ref|NM_001045338.1| Danio rerio histamine receptor H2 (hrh2), mRNA	0	0	0	0	0	0	0	0	0	0	0	0	0	0	0	0	0	0	0	0	0	0.328667
gi|113673504|ref|NM_001044762.1| Danio rerio si:dkey-204a24.2 (si:dkey-204a24.2), mRNA	1.518	0.088	0.36475	0.245	0.171	0.43725	1.084	0.085	0.079	0.897	0.922	0	0.364	0.224	0.075	0.237	0.471	2.652	0.484	1.072	1.412	2.26967
gi|113673507|ref|NM_001045439.1| Danio rerio heterogeneous nuclear ribonucleoprotein A3 (hnrnpa3), mRNA	1.716	0	0.32925	0.1285	0	0.135	0.082	0	0.134	0.304	0.149	0	0.247	0.095	0	0	0	0	0.0335	0.582	0.065	0
gi|113673892|ref|NM_001045440.1| Danio rerio zgc:153328 (zgc:153328), mRNA	129.487	153.546	36.7323	20.5635	115.769	29.3385	126.164	178.729	21.235	106.564	124.103	178.574	371.052	333.657	260.511	299.614	80.526	54.454	50.4135	31.3445	42.7045	14.7917
gi|113673939|ref|NM_001045437.1| Danio rerio zgc:153222 (zgc:153222), mRNA	0.213	0.519	0.55125	0	0.3365	1.16375	0.356	0.503	0.466	1.589	0	0	0.859	0.165	0	0.234	0.116	0	0.5055	0	1.6	0.0186667
gi|113673985|ref|NM_001044774.1| Danio rerio tRNA isopentenyltransferase 1 (trit1), mRNA	0.608	1.108	0.8795	2.0605	0.527	0.86075	1.164	1.432	0.912	1.413	3.506	1.185	1.529	0.53	2.843	2.162	0.578	0.656	0.908	0	1.732	3.18167
gi|113674038|ref|NM_001044776.1| Danio rerio milk fat globule-EGF factor 8 protein a (mfge8a), transcript variant 2, mRNA	0.816	3.802	28.8115	41.433	4.337	11.6775	21.974	5.929	27.464	26.983	55.825	0	2.462	1.001	0.141	2.53	24.897	40.125	16.5055	5.6765	129.749	9.43433
gi|113674065|ref|NM_001044777.1| Danio rerio membrane protein, palmitoylated 6b (MAGUK p55 subfamily member 6) (mpp6b), mRNA	3.562	2.264	3.06175	0.1695	1.358	0.29375	2.752	0.763	2.033	2.711	0.885	3.536	7.006	4.392	1.01	3.899	2.464	8.299	3.3565	2.588	4.0125	0.906667
gi|113674094|ref|NM_001044752.1| Danio rerio TNF receptor-associated factor 6 (traf6), mRNA	3.719	4.284	7.10025	3.8315	8.918	2.85475	6.784	14.304	2.137	8.741	10.225	4.275	11.424	10.618	6.104	14.354	7.977	1.373	6.827	13.1195	7.3625	0.281333
gi|113674096|ref|NM_001044779.1| Danio rerio zgc:113424 (zgc:113424), mRNA	0	0	0	0	0	0	0	0	0	0	0	0	0	0	0	0	0	0	0.1615	0	0	43.9743
gi|113674130|ref|NM_001044783.1| Danio rerio XPA binding protein 2 (xab2), mRNA	2.103	1.35	0.229	0.335	2.438	2.2485	1.713	0.964	0.383	1.957	1.916	0.273	0.941	1.041	0.121	0.256	0.19	0.63	1.769	2.6225	0.7495	5.89433
gi|113674177|ref|NM_001044780.1| Danio rerio UBX domain protein 6 (ubxn6), mRNA	5.326	3.238	4.61175	5.686	6.197	9.155	4.992	4.708	7.452	5.368	6.571	3.505	3.852	3.676	9.344	6.376	1.447	4.041	11.752	3.494	12.0575	1.45767
gi|113674180|ref|NM_001045301.1| Danio rerio tumor necrosis factor, alpha-induced protein 8, like 2a (tnfaip8l2a), mRNA	0.559	1.02	5.47475	1.603	0.6905	2.2695	1.826	1.845	0.366	1.317	1.698	2.093	0.45	2.729	2.208	1.591	1.64	1.387	0.662	0.5565	1.496	1.206
gi|113674213|ref|NM_001045299.1| Danio rerio crumbs homolog 2a (crb2a), mRNA	0	0.32	0.13225	0.189	0.063	0.3485	0.439	0.155	0.18	0.082	0.2	0	0	0	0	0	0	0.142	0.8585	0	0.194	0.068
gi|113674216|ref|NM_001045298.1| Danio rerio zgc:136808 (zgc:136808), mRNA	0.353	0.429	0.11125	0.0925	0.6945	0.32725	0.353	0	0.385	0.219	0.107	0.275	1.951	1.298	0.916	0.193	0.192	0.285	2.087	0	1.0225	1.81833
gi|113674257|ref|NM_001045300.1| Danio rerio zgc:136758 (zgc:136758), mRNA	1.446	10.669	4.92825	1.837	3.181	0.40425	12.017	12.388	6.422	8.432	17.687	3.911	6.404	9.714	10.625	8.76	5.449	12.746	3.8085	1.595	9.101	3.017
gi|113674280|ref|NM_001045296.1| Danio rerio zgc:136302 (zgc:136302), mRNA	0	0	0	0	0	0	0	0	0	0	0	0	0	0	0	0	0	0	0	0	0	2.23967
gi|113674322|ref|NM_001045297.1| Danio rerio zgc:136560 (zgc:136560), mRNA	2.314	1.948	2.67425	2.321	6.138	1.0205	4.151	3.356	0.972	4.194	2.919	1.666	1.791	1.862	1.48	2.727	0.87	2.497	3.934	4.199	2.051	2.67267
gi|113674345|ref|NM_001045291.1| Danio rerio SET and MYND domain containing 2b (smyd2b), transcript variant 2, mRNA	0.715	4.929	1.203	0.6215	1.002	0.38525	3.536	6.605	0.651	4.585	8.836	1.116	1.08	3.742	2.603	2.741	4.73	8.299	1.7705	1.057	2.7645	2.759
gi|113674445|ref|NM_001045286.1| Danio rerio zgc:136545 (zgc:136545), mRNA	0	0	0	0	0	0	0	0	0	0	0	0	0	0	0	0	0	0	0	0	0	0.663667
gi|113674507|ref|NM_001045289.1| Danio rerio prefoldin subunit 2 (pfdn2), mRNA	0.363	0.221	0.0975	0.2855	0	0.3885	0.121	0.428	0.099	0.113	0.221	1.701	0	0.141	0.756	1.193	0.099	0.392	0.0775	0	0.048	29.546
gi|113674546|ref|NM_001045287.1| Danio rerio zgc:136569 (zgc:136569), mRNA	0.14	0	0.01775	0	0	0	0.047	0	0	0.173	0	0	0	0	0	0	0.228	0.603	1.165	0	0	0.376667
gi|113674576|ref|NM_001045285.1| Danio rerio ataxin 7-like 2a (atxn7l2a), mRNA	1.214	1.291	0.162	0.5145	0.1195	0.30125	1.618	0.358	0.166	1.599	1.567	0.592	1.374	1.47	2.996	2.159	0.742	4.42	1.016	1.35	0.3645	4.29733
gi|113674586|ref|NM_001045280.1| Danio rerio plakophilin 3 (pkp3), mRNA	2.69	0.844	0.16375	0	0	0	1.879	0.102	0.047	0.269	0	0.609	0.873	1.58	1.533	0	0.66	1.217	0.1815	0.0485	0.0585	2.988
gi|113674616|ref|NM_001045284.1| Danio rerio zgc:136597 (zgc:136597), mRNA	6.792	13.69	3.973	2.139	23.966	9.1715	19.296	15.588	10.148	22.612	15.849	6.413	8.632	19.391	18.208	28.56	10.1	23.721	29.214	25.914	34.0735	4.50333
gi|113674670|ref|NM_001045279.1| Danio rerio cytokine receptor family member b9 (crfb9), mRNA	1.531	6.205	1.16425	0.755	4.709	2.9365	3.345	17.645	3.065	2.849	37.509	0.663	7.018	7.91	15.386	19.365	3.328	8.352	2.275	0.7455	5.1825	0.923667
gi|113674673|ref|NM_001045276.1| Danio rerio zgc:136346 (zgc:136346), mRNA	0.274	1.165	0.0695	0.3205	0.4315	0.1345	0.319	0.807	0.149	0.34	0.582	0.32	0.275	0.477	0.285	0.3	0.595	0.96	0.17	0.275	0.148	7.44533
gi|113674736|ref|NM_001045274.1| Danio rerio TATA box binding protein (TBP)-associated factor, RNA polymerase I, A (taf1a), mRNA	6.535	0.722	1.5355	2.795	1.999	2.66825	1.518	3.268	1.946	0.86	1.323	0	1.196	0.153	0.618	3.901	0.538	3.633	2.037	2.5515	2.093	12.7823
gi|113674788|ref|NM_001045275.1| Danio rerio zgc:136353 (zgc:136353), mRNA	0	8.693	0	0	0	0	10.192	3.745	0	4.681	0.724	2.479	0	13.698	7.433	0.87	2.374	10.501	0.054	0	0	3.58367
gi|113674829|ref|NM_001045273.1| Danio rerio cadherin 4, retinal (cdh4), transcript variant 2, mRNA	0	0	0	0	0	0	0.113	0	0	0	0	0	0	0	0	0	0	0	0	0	0	0
gi|113674861|ref|NM_001045269.1| Danio rerio zgc:136359 (zgc:136359), mRNA	3.949	0.686	0.3565	0	0.12	0	0.188	0.665	0	0.466	0	0	0	0	0	0	0.204	0	0	0	0	0.731667
gi|113674909|ref|NM_001045268.1| Danio rerio YY1 associated factor 2 (yaf2), mRNA	5.388	1.242	1.23925	2.131	2.0845	0.42875	1.362	0.876	0.406	1.267	1.016	0.145	0.748	0.504	0.386	0.813	0.808	1.403	0.6955	2.7	0.4465	1.76967
gi|113674955|ref|NM_001045263.1| Danio rerio forkhead box N3 (foxn3), mRNA	0	0.922	2.5855	0.8915	0.199	0.81775	1.095	0.149	1.586	2.037	0.46	1.675	0.508	0.881	0	0	0.687	1.977	0.4925	0.7705	2.0815	0.451667
gi|113674990|ref|NM_001045265.1| Danio rerio copper metabolism (Murr1) domain containing 1 (commd1), mRNA	5.745	6.53	5.15325	6.914	16.87	16.8528	12.736	21.492	8.183	12.394	13.807	8.573	7.54	18.874	10.387	12.577	2.715	5.391	8.7065	11.368	7.1265	0.978
gi|113675036|ref|NM_001045264.1| Danio rerio metal response element binding transcription factor 2 (mtf2), mRNA	0	0	0	0	0.068	0.205	0	0.341	0.158	0.179	0.264	0	0	0	0	0.317	0.157	0.937	0.281	0	0.059	3.265
gi|113675087|ref|NM_001045257.1| Danio rerio cell growth regulator with ring finger domain 1 (cgrrf1), transcript variant 2, mRNA	0.735	1.34	1.37375	1.2155	0.85	0.75175	2.448	3.753	2.407	3.494	4.909	4.203	2.218	1.613	0	0.804	8.518	1.982	1.3925	0	3.9095	0.668333
gi|113675124|ref|NM_001045260.1| Danio rerio zgc:136354 (zgc:136354), mRNA	0.614	0.995	0.623	0.6405	0.599	1.27575	2.251	1.568	1.285	1.587	3.108	0.16	0.824	0	0.213	0.112	0.778	3.423	0.3355	0.29	1.3185	2.02733
gi|113675127|ref|NM_001045253.1| Danio rerio si:ch211-199o1.5 (si:ch211-199o1.5), mRNA	8.658	1.08	2.01425	9.09	7.2605	3.20225	3.033	6.542	4.969	4.268	4.854	1.558	6.925	2.839	0.231	2.187	0.724	0.359	8.087	7.8425	3.5435	4.56067
gi|113675175|ref|NM_001045258.1| Danio rerio paraspeckle component 1 (pspc1), mRNA	0.643	4.007	0.69675	1.892	1.421	1.662	4.018	1.895	2.721	3.39	4.59	0.376	0.162	0.436	2.173	3.167	1.572	6.419	1.4665	0.8745	2.242	2.63
gi|113675231|ref|NM_001045251.1| Danio rerio zgc:136552 (zgc:136552), mRNA	0	0	0	0	0.1915	0.179	0.115	0	0.283	0	0	0	0.174	0.335	0	0	0.094	0.56	0	0.764	0	1.528
gi|113675259|ref|NM_001045249.1| Danio rerio zgc:136493 (zgc:136493), mRNA	1.131	0.412	1.0375	4.004	2.423	2.332	1.583	1.866	1.975	1.543	2.747	1.058	3.413	3.33	0	2.723	0.492	1.708	5.587	1.7815	1.3075	1.632
gi|113675268|ref|NM_001044868.1| Danio rerio si:dkey-14d8.2 (si:dkey-14d8.2), mRNA	0.369	1.346	1.202	1.2005	1.5715	0.45675	3.381	2.609	2.518	3.546	4.258	0	0.186	0.143	0	0.404	0.902	7.066	2.5095	0.243	5.8035	0.126333
gi|113675293|ref|NM_001045252.1| Danio rerio forkhead box L2 (foxl2), mRNA	0	0	0	0	0	0	0	0	0	0	0	0	0	0	0	0	0	0	0	0	0	0
gi|113675332|ref|NM_001045247.1| Danio rerio zgc:136308 (zgc:136308), mRNA	0.884	1.612	0.59	0.4225	1.0695	0.42975	1.08	2.257	1.528	1.37	1.879	0.115	1.186	0.628	0.306	2.096	0	1.272	2.9475	1.2715	3.6715	0.445667
gi|113675335|ref|NM_001045250.1| Danio rerio Rho GTPase activating protein 10 (arhgap10), mRNA	1.022	0.395	0.44675	0.1945	0.237	0.95225	0.495	0.766	0.203	0.691	1.298	0.217	0.935	0.468	1.545	0.712	0.202	0.902	0.9915	0.2385	0.5105	5.63833
gi|113675397|ref|NM_001045246.1| Danio rerio cell adhesion molecule 3 (cadm3), mRNA	139.106	93.563	84.5175	197.775	55.258	138.498	75.713	28.443	60.407	59.161	29.593	5.86	11.683	2.117	0.237	4.485	48.246	93.475	122.935	194.856	121.642	0.118667
gi|113675399|ref|NM_001045248.1| Danio rerio ubiquitin specific peptidase 22 (usp22), mRNA	1.684	2.56	0.741	2.0665	2.3105	1.8395	3.087	2.779	1.655	3.656	2.455	3.284	2.373	2.415	3.502	3.134	0.732	4.271	0.729	0.9435	3.656	4.66267
gi|113675441|ref|NM_001045243.1| Danio rerio apoptotic protease activating factor 1 (apaf1), transcript variant 1, mRNA	1.004	0.407	0.9645	0.7885	2.0905	1.53475	1.616	3.154	0.365	1.141	5.486	0.913	1.851	4.472	1.913	5.126	1.363	3.79	6.064	2.1275	3.031	0.806
gi|113675486|ref|NM_001045241.1| Danio rerio si:ch211-160d20.3 (si:ch211-160d20.3), mRNA	1.166	1.89	0.4065	1.933	1.1305	0.1515	2.849	1.374	1.167	1.928	2.596	1.212	1.368	2.108	0.404	2.552	0.739	1.363	1.512	0.8065	1.274	0.571333
gi|113675497|ref|NM_001045225.1| Danio rerio UDP-Gal:betaGal beta 1,3-galactosyltransferase polypeptide 6 (b3galt6), mRNA	0	0	0	0	0	0	0.109	0	0	0.407	0	0	0	0	0	0	0.357	1.77	0	0	0	0.846
gi|113675508|ref|NM_001045240.1| Danio rerio phosphopantothenoylcysteine synthetase (ppcs), mRNA	0.27	1.314	0.93825	2.6065	1.024	1.69	2.7	2.228	1.18	3.35	0.82	1.264	2.174	1.465	1.404	1.478	0.294	0.291	0.5975	0	0.644	1.62967
gi|113675574|ref|NM_001045237.1| Danio rerio zgc:136538 (zgc:136538), mRNA	0	0.109	0	0	0	0	0.12	0	0	0	0	0.14	0	0	0	0	0	0	0	1.0375	0	0.971667
gi|113675577|ref|NM_001045235.1| Danio rerio polycomb group ring finger 5b (pcgf5b), mRNA	0.088	0	0	0	0.197	0	0.059	0	0	0.055	0.054	0	0.089	0.068	0	0	0.144	0.238	0.279	0.654	0.2605	1.32167
gi|113675608|ref|NM_001045238.1| Danio rerio zgc:136336 (zgc:136336), mRNA	1.605	0.759	0.3045	0.3735	1.2985	2.252	1.545	1.682	0.584	2.876	5.308	0.556	1.436	1.313	4.45	2.733	1.357	5.677	3.0945	0.294	2.0365	1.18833
gi|113675644|ref|NM_001045236.1| Danio rerio dachshund c (dachc), mRNA	3.383	0	0.00925	0.154	0.2785	0.03	0.294	0	0	0.274	0	0.574	1.332	2.28	5.352	2.737	0.08	0.079	1.3045	1.3475	0.1585	0.806333
gi|113675679|ref|NM_001045446.1| Danio rerio UBX domain protein 10 (ubxn10), mRNA	0	0	0	0	0	0.03775	0	0.308	0	0	0	0	0	0.101	0	0	0	0	0	0	0	0.477
gi|113675682|ref|NM_001045183.1| Danio rerio sodium channel, voltage-gated, type VIII, alpha b (scn8ab), mRNA	0	0	0	0	0	0	0	0	0	0	0	0	0	0	0	0	0	0	0	0.285	0	0.071
gi|113675723|ref|NM_001045222.1| Danio rerio peptidoglycan recognition protein 6 (pglyrp6), mRNA	12.596	5.809	19.5068	0.964	0.379	1.23575	3.763	0	0.949	0	0	2.033	0	0.505	0.452	0	1.062	1.055	0.059	0	0.8485	5.845
gi|113675725|ref|NM_001045162.1| Danio rerio crumbs homolog 2b (crb2b), mRNA	0.119	0	0.00375	0	0	0.0085	0.08	0	0.033	0.185	0.145	0.047	0	0.023	0	0	0.032	0.097	0	0	0.0645	0.00466667
gi|113675782|ref|NM_001045166.1| Danio rerio peptidoglycan recognition protein 2 (pglyrp2), mRNA	0.15	0	0	0.274	0.0705	0	0	0	0	0.373	0	0	0	0	0	0	0	0.162	0	0	0.061	0.842667
gi|113675785|ref|NM_001045445.1| Danio rerio zgc:153724 (zgc:153724), mRNA	0	0	0	0	0	0	0	0	0	0	0	0	0	0	0	0	0	0	0	0	0	0
gi|113675821|ref|NM_001045123.1| Danio rerio sodium channel, voltage gated, type XII, alpha b (scn12ab), mRNA	0	0.035	0.1855	0.0305	0	0.035	0	0	0	0.108	0.07	0	0.116	0.045	0	0	0.534	0.031	0.0315	0	0.3865	0.341333
gi|113675853|ref|NM_001045159.1| Danio rerio nuclear factor of activated T-cells, cytoplasmic, calcineurin-dependent 1 (nfatc1), mRNA	0.113	0	0.14975	0	0.036	0.06225	0	0	0	0.211	0	0	0	0	0	0	0	0	0.031	0	0	0.238333
gi|113675889|ref|NM_001045087.1| Danio rerio otolith matrix protein (otomp), mRNA	77.647	3.59	1.44525	3.0845	1.307	0.0925	6.985	0.696	1.773	8.972	1.076	0	0.891	0	0	0	3.048	13.38	35.2215	85.6525	3.57	0.579333
gi|113675931|ref|NM_001045448.1| Danio rerio nuclear transport factor 2-like export factor 2 (nxt2), mRNA	1.093	1.328	1.22175	0	3.372	1.08375	2.366	6.438	4.772	0.678	1.991	0.852	2.748	1.482	2.271	1.794	0	0.884	0.604	0.09	1.3905	19.2607
gi|113675953|ref|NM_001045451.1| Danio rerio zgc:153766 (zgc:153766), mRNA	0	0.31	0.327	2.0685	0.8045	1.3205	0.68	2.407	1.533	0.317	4.496	2.986	7.448	4.154	1.857	3.352	0.555	0.138	0.5005	0.084	3.3065	0.514
gi|113675977|ref|NM_001045030.1| Danio rerio protogenin homolog a (Gallus gallus) (prtga), mRNA	2.6	1.799	0.27675	0	0.17	0.3705	0.149	0	0.049	0.167	0	0.28	0	0.035	0.373	0	0.731	0.048	0.576	0	0	0.0773333
gi|113676016|ref|NM_001044943.1| Danio rerio crumbs homolog 1 (Drosophila) (crb1), mRNA	0.536	0.419	0.543	1.779	0.3395	0.29875	0.613	0.903	0.753	1.521	1.21	0	0.386	0.059	0	0	0.083	0.289	0.031	0	0.8455	0.0323333
gi|113676052|ref|NM_001045065.1| Danio rerio sodium channel, voltage-gated, type IV, alpha, b (scn4ab), mRNA	0.063	0	0.021	0	0	0	0	0	0	0.079	0	0	0	0	0	0	0	0	0	0	0	0.960333
gi|113676068|ref|NM_001045450.1| Danio rerio zgc:153425 (zgc:153425), mRNA	5.317	8.404	4.043	2.6385	17.6295	5.6615	12.225	8.147	4.064	12.86	7.751	4.562	5.885	10.095	14.371	8.147	4.912	5.45	34.908	15.3835	15.961	7.21767
gi|113676094|ref|NM_001045469.1| Danio rerio lethal giant larvae homolog 1 (Drosophila) (llgl1), mRNA	0.305	8.167	0	0	0	0	15.872	1.439	0	2.651	0.556	1.667	0	16.208	22.853	0.334	7.798	27.346	0	0.171	0	4.25133
gi|113676108|ref|NM_001045449.1| Danio rerio zinc finger, GATA-like protein 1 (zglp1), mRNA	0	0	0	0	0	0	0	0	0	0	0	0	0	0	0	0	0	0	0	0	0	19.2177
gi|113676137|ref|NM_001044922.1| Danio rerio sodium channel, voltage gated, type XII, alpha a (scn12aa), mRNA	0	0	0.02325	0.1065	0	0	0	0	0	0.109	0	0	0	0	0	0	0.095	0.631	0	0	0	0.071
gi|113676163|ref|NM_001044931.1| Danio rerio potassium voltage-gated channel, subfamily H (eag-related), member 1 (kcnh1), mRNA	0	0	0	0	0	0	0	0	0	0	0	0	0	0	0	0	0	0	0	0.7145	0	0
gi|113676189|ref|NM_001044911.1| Danio rerio neuregulin 1 (nrg1), mRNA	0.767	0.078	0.14925	0	0	0.0185	0.213	0	0	0.317	0	0.499	0.129	0.495	0.798	1.26	0.069	0.483	0.3575	0.8595	0.156	2.91333
gi|113676241|ref|NM_001044906.1| Danio rerio zgc:136763 (zgc:136763), mRNA	0.625	0.228	1.20675	1.1095	3.0165	2.33925	2.624	1.62	0.887	5.736	2.657	0	0.126	0.048	0.39	1.231	1.902	6.204	11.525	2.508	4.947	0.947333
gi|113676265|ref|NM_001045466.1| Danio rerio RAB9A, member RAS oncogene family (rab9a), mRNA	8.044	20.623	10.9522	33.757	59.2765	32.2983	23.074	89.032	19.093	19.303	25.702	7.911	52.431	26.153	25.812	22.2	6.461	13.585	20.4435	16.6405	7.399	5.08667
gi|113676315|ref|NM_001044912.1| Danio rerio homeo box B13a (hoxb13a), mRNA	0	0	0	0	0	0	0.096	0	0.157	0	0	0	0	0	0	0	0	0	0	0	0	0.035
gi|113676342|ref|NM_001045467.1| Danio rerio transgelin (tagln), mRNA	30.502	9.271	17.874	0.4315	2.088	2.15275	138.723	7.773	3.6	292.436	158.975	2.572	0	9.423	23.566	9.023	100.114	197.029	657.275	179.493	84.1765	2.134
gi|113676356|ref|NM_001044904.1| Danio rerio tumor necrosis factor receptor superfamily, member 19 (tnfrsf19), mRNA	2.532	7.056	1.88125	0.7155	1.6315	0.21825	10.583	6.715	5.415	9.292	8.075	0.576	1.593	1.594	1.755	1.27	1.777	6.774	7.2325	1.137	6.8955	1.07667
gi|113676372|ref|NM_001044895.1| Danio rerio sodium channel, voltage-gated, type I like, alpha b (scn1lab), mRNA	0	0	0	0	0	0	0	0	0.031	0	0	0	0	0	0	0	0	0	0	0	0	0.0383333
gi|113676378|ref|NM_001044848.1| Danio rerio zgc:136551 (zgc:136551), mRNA	1.741	2.434	1.1035	0.729	1.976	1.32225	1.914	2.872	0.665	3.022	1.269	7.06	2.627	5.395	2.895	4.953	1.04	0.939	3.199	0.396	2.378	5.88333
gi|113676436|ref|NM_001045465.1| Danio rerio zgc:154068 (zgc:154068), mRNA	2.272	0.153	0.44875	0	0.0805	0.51175	0.336	1.487	0	0	0	0	1.778	0	0	1.934	0.137	0	2.4885	0	0.2365	7.64733
gi|113676528|ref|NM_001044836.1| Danio rerio si:dkey-14d8.7 (si:dkey-14d8.7), mRNA	0	0	0	0	0	0	0	0	0	0	0	0	0	0	0	0	0	0	1.778	0	10.6175	4.46533
gi|113676532|ref|NM_001045119.1| Danio rerio si:ch211-244p18.3 (si:ch211-244p18.3), mRNA	1.984	1.525	0.698	0.4115	0.4435	0.47225	1.497	1.169	0.414	2.388	1.418	1.866	1.82	2.283	3.033	1.788	1.236	2.928	1.5355	0.271	1.0335	1.29133
gi|113676548|ref|NM_001044758.1| Danio rerio CWF19-like 1, cell cycle control (cwf19l1), mRNA	5.787	7.864	4.4665	4.397	14.104	3.0885	9.982	20.462	6.691	6.228	11.269	1.593	8.392	11.673	0.177	15.835	3.422	7.53	12.381	6.119	12.1	3.76167
gi|113676565|ref|NM_001045453.1| Danio rerio solute carrier family 25, member 42 (slc25a42), mRNA	2.075	2.523	4.44	0.4345	1.1445	0.80425	2.074	4.157	0.453	4.504	4.285	0.809	1.879	3.376	2.157	1.135	1.015	1.679	1.534	0.0685	2.446	1.21267
gi|113676579|ref|NM_001044755.1| Danio rerio si:dkey-11e23.5 (si:dkey-11e23.5), mRNA	0.815	0.396	1.371	1.0205	1.0095	2.75225	1.086	1.537	0.623	3.033	1.584	0.89	2.296	3.032	3.05	2.855	1.417	4.134	1.066	1.3805	1.354	1.181
gi|113676612|ref|NM_001045232.1| Danio rerio SCO cytochrome oxidase deficient homolog 2 (yeast) (sco2), nuclear gene encoding mitochondrial protein, mRNA	0.402	0.245	0.07	0.7325	0.506	0.058	0.134	0.474	0.22	0	0.489	0	0	0.156	0	0	0	0	0	0	0	0.813333
gi|113676615|ref|NM_001044760.1| Danio rerio si:dkey-13a21.3 (si:dkey-13a21.3), mRNA	0	0	0.1625	0	0	0	0	0	0	0	0	0	0	0	0	0	0	0	0	0	0	0
gi|113676646|ref|NM_001044757.1| Danio rerio ATPase, Ca++ transporting, plasma membrane 1a (atp2b1a), mRNA	7.524	10.5	2.6605	1.815	1.1715	0.92725	8.244	6.987	4.201	4.879	5.609	5.158	10.095	12.722	10.962	8.859	11.151	18.914	7.413	4.647	3.5325	4.019
gi|113676657|ref|NM_001044753.1| Danio rerio methyl-CpG binding domain protein 1 (mbd1), mRNA	0.947	0	0.0275	0.0825	0.0505	0.2835	0.315	0.372	0	0	0	0	0.159	0.367	0	0	0.171	0.511	0.3795	0	0.1705	9.81767
gi|113676664|ref|NM_001045207.1| Danio rerio ArfGAP with SH3 domain, ankyrin repeat and PH domain 2a (asap2a), mRNA	1.354	0.387	0.5325	0.167	0.428	0.29525	0.796	0.282	0.261	0.296	0.532	2.548	2.164	0.772	0.331	0.698	0.303	0.602	0.988	0	0.287	0.882667
gi|113676667|ref|NM_001044844.1| Danio rerio family with sequence similarity 102, member B, b (fam102bb), mRNA	0	0.441	0.48075	1.387	0.381	0.445	0.886	2.28	1.188	2.849	2.35	0	0.973	0.094	2.513	0.794	1.314	5.74	1.5675	0	2.329	0.783
gi|113676707|ref|NM_001045198.1| Danio rerio hook homolog 1 (hook1), mRNA	4.965	0.377	0.276	0.13	0.156	0.242	0.579	0.146	0.339	0.539	0.603	0	0	0.048	0.903	0.136	0.472	1.741	0.412	1.088	1.117	1.36933
gi|113676720|ref|NM_001045463.1| Danio rerio nucleobindin 1 (nucb1), mRNA	4.004	3.557	1.2185	1.8085	3.5105	2.242	6.055	2.722	1.934	4.393	2.619	0.24	4.183	1.313	0	3.539	0.335	0.914	7.351	2.0805	4.05	5.89533
gi|113676724|ref|NM_001045192.1| Danio rerio si:ch211-10j20.3 (si:ch211-10j20.3), mRNA	0	0	0	0	0	0	0.165	0	0	0.307	0.301	0	0	0	0.515	0	0	0	0	0	0	0
gi|113676739|ref|NM_001045200.1| Danio rerio si:dkey-183n20.15 (si:dkey-183n20.15), mRNA	0.274	0	0	0	0	0	0.183	0	0	0	0	0.214	0.551	0.849	0	0	0.149	0	0	0	0	9.942
gi|113676743|ref|NM_001045202.1| Danio rerio si:dkey-183n20.16 (si:dkey-183n20.16), mRNA	0.221	0.224	0.199	0.077	0.5835	0.14875	0.614	1.651	0.121	1.417	0.582	35.59	45.243	42.071	20.613	29.448	1.242	1.114	0.226	0.066	0.138	4.53333
gi|113676762|ref|NM_001045187.1| Danio rerio si:ch211-199l3.1 (si:ch211-199l3.1), mRNA	0	1.07	0	0	0.1405	0.52025	0.073	0.519	0.24	1.501	1.203	0.858	2.435	2.387	2.287	3.371	0.239	0.95	0.5505	0	0.0585	0
gi|113676788|ref|NM_001045193.1| Danio rerio si:dkey-12h9.13 (si:dkey-12h9.13), mRNA	0.096	0	0.0665	0	1.2685	0.05275	0.255	2.364	0.365	0.237	1.276	0.819	0	0.037	0	0.418	0.052	0.464	0.997	0	0.743	1.91167
gi|113676894|ref|NM_001045144.1| Danio rerio component of oligomeric golgi complex 5 (cog5), mRNA	0	0.343	0.249	0.88	0.2685	0.5995	0.15	0.266	0	0.28	0.274	0	0.794	0.349	0	0.123	4.717	0.669	0.6695	0	0.484	2.35533
gi|113676906|ref|NM_001045464.1| Danio rerio membrane-spanning 4-domains, subfamily A, member 17A.16 (ms4a17a.16), mRNA	0	0	0	0	0	0	0	0	0	0	0	0	0	0	0	0	0	0	0	0	0	1.732
gi|113676916|ref|NM_001045137.1| Danio rerio si:ch211-194d6.1 (si:ch211-194d6.1), mRNA	0	0	0	0	0.1225	0	0	0	0	0	0	0	0	0	0.203	0	0	0	0	0	0	0.025
gi|113676947|ref|NM_001045454.1| Danio rerio zgc:153121 (zgc:153121), mRNA	1.958	0.34	0.2935	0.1465	2.566	0.7065	1.305	0	0.153	0.52	3.057	0.436	1.126	1.625	0	1.224	0.608	0.604	2.605	0	2.249	0.878333
gi|113676967|ref|NM_001045455.1| Danio rerio zgc:153441 (zgc:153441), mRNA	10.826	27.35	23.9675	20.637	21.7505	18.8193	45.376	15.312	33.099	38.495	11.69	0	2.179	0.559	0.5	0.79	9.151	28.816	38.4505	18.6785	60.125	0
gi|113676969|ref|NM_001045101.1| Danio rerio DNA cross-link repair 1C, PSO2 homolog (S. cerevisiae) (dclre1c), mRNA	2.827	6.101	1.7025	7.2255	3.554	8.28325	5.416	5.831	10.572	4.734	5.494	0.441	2.987	3.396	3.673	4.95	1.92	2.364	2.14	0.8755	3.053	7.597
gi|113676999|ref|NM_001045116.1| Danio rerio tripartite motif-containing 66 (trim66), mRNA	0	0	0	0	0	0	0	0	0	0	0	0	0	0	0	0	0	0	0	0	0	0
gi|113677015|ref|NM_001045462.1| Danio rerio zgc:153290 (zgc:153290), mRNA	8.432	3.943	7.91725	4.62	8.921	5.37125	5.98	6.88	10.623	2.95	1.838	9.275	8.919	6.869	1.798	6.153	1.762	0.35	5.6055	7.1745	2.4035	1.08067
gi|113677022|ref|NM_001045110.1| Danio rerio si:dkey-153k10.9 (si:dkey-153k10.9), mRNA	0.089	0.108	0.0055	0	0	0.036	0.118	0	0	0.11	0	0	0	0	0	0	0.096	0.67	0.16	0.044	0.083	0.496
gi|113677035|ref|NM_001045094.1| Danio rerio si:ch211-89p3.3 (si:ch211-89p3.3), mRNA	0.244	0.371	0.06775	0.032	0.164	0.18675	0.203	0.072	0.067	0.114	0.037	0.333	0.184	0.047	0.19	0.334	0.066	0	0.28	0.2295	0.213	0.753333
gi|113677054|ref|NM_001045461.1| Danio rerio zgc:153383 (zgc:153383), mRNA	1.001	0.304	1.04675	0.524	8.919	1.668	0.5	4.718	2.732	9.309	11.244	1.171	6.545	2.714	0	7.119	0.272	3.509	4.2435	0.165	2.6795	0.893333
gi|113677074|ref|NM_001045076.1| Danio rerio heat shock protein 14 (hspa14), mRNA	17.098	16.189	27.6005	54.672	52.0125	23.475	16.789	50.468	58.649	12.856	25.181	4.013	40.801	13.601	6.763	13.414	30.091	8.326	22.3555	5.749	16.8685	11.0637
gi|113677078|ref|NM_001045091.1| Danio rerio AHA1, activator of heat shock protein ATPase homolog 1 (yeast) (ahsa1), mRNA	0	0	0.0515	0	0	0	0.256	0	0.21	0	0.117	0	0.193	0	2.196	0	0	0	0	0	0	0.259
gi|113677100|ref|NM_001045067.1| Danio rerio si:dkey-207j16.2 (si:dkey-207j16.2), mRNA	1.222	0.908	0.189	0.142	2.2295	0.2075	3.711	2.241	0.519	5.39	4.949	7.097	7.242	14.523	23.575	36.564	0.812	4.249	5.5105	1.1185	3.406	8.71433
gi|113677126|ref|NM_001045064.1| Danio rerio host cell factor C1a (hcfc1a), mRNA	6.49	4.835	2.12925	0.1535	2.26	0.912	2.748	3.278	0.48	2.481	2.667	0.913	0.589	1.172	6.138	2.35	1.67	5.686	7.572	1.4985	1.4825	7.42067
gi|113677154|ref|NM_001045059.1| Danio rerio si:ch211-153j24.4 (si:ch211-153j24.4), mRNA	0	0	0	0	0	0	0.177	0	0	0	0.647	0	0	0	0	0	0	0	0	0	0.499	0.758667
gi|113677166|ref|NM_001045460.1| Danio rerio zgc:153728 (zgc:153728), mRNA	0	0.134	0	0	0	0.03175	0.147	0	0	0	0	0	0	0.085	0	0	0.24	0.119	0	0	0	2.04733
gi|113677178|ref|NM_001045057.1| Danio rerio si:dkey-21h14.1 (si:dkey-21h14.1), mRNA	0	0	0.025	0.4775	0.078	0.5155	0.277	0.196	0.091	1.446	0.405	0	1.341	0.194	0	0.911	0.543	2.875	1.27	0	3.659	0.749333
gi|113677181|ref|NM_001045042.1| Danio rerio protein arginine methyltransferase 8b (prmt8b), mRNA	0.338	0.41	0.2745	0.3535	0	0.40625	3.149	1.193	0.553	1.047	0.41	0	0	0	0	0	0.734	0.546	0.924	0.4115	1.223	0.153
gi|113677203|ref|NM_001045054.1| Danio rerio si:dkey-21h14.2 (si:dkey-21h14.2), mRNA	0	0.25	0.078	0	0.3235	0.6305	0.547	0.968	2.466	0	1.996	0.32	0.413	0	0.854	1.348	0.223	2.88	0.5105	0.0675	0.987	6.08133
gi|113677234|ref|NM_001045037.1| Danio rerio si:dkey-21h14.7 (si:dkey-21h14.7), mRNA	0.397	1.688	0.4135	0.93	0.439	0	1.983	0.935	0.217	0.492	0.964	0	0	0	0.412	0	0.431	0.214	1.0935	0	0.477	0.485667
gi|113677244|ref|NM_001045025.1| Danio rerio tripartite motif-containing 54 (trim54), mRNA	0	0.158	0	0	0	0	0.087	0	0	0	0	0	0	0	0	0	0	0	0	0	0	0
gi|113677272|ref|NM_001044797.1| Danio rerio mitochondrial ribosomal protein S11 (mrps11), nuclear gene encoding mitochondrial protein, mRNA	0	1.799	0.18675	0	0	0.63025	0.863	1.308	0	1.835	0	4.617	0	1.433	0	2.024	0	0	0.8325	1.914	0.2485	4.48833
gi|113677286|ref|NM_001045020.1| Danio rerio solute carrier family 30 (zinc transporter), member 2 (slc30a2), mRNA	0	0	0	0	0	0	0.112	0	0	0	0	0	0	0	0	0	0	0	0	0	0	0.172667
gi|113677305|ref|NM_001045010.1| Danio rerio si:dkey-174m14.3 (si:dkey-174m14.3), mRNA	0	0	0	0	0	0	0	0	0	0	0	0	0	0	0	0	0	0	0	0	0	0.425333
gi|113677307|ref|NM_001044803.1| Danio rerio solute carrier family 10 (sodium/bile acid cotransporter family), member 4 (slc10a4), mRNA	0.666	0.202	0	0	0	0.1045	0	0	0	0	0	0	0	0	0	0	0	0	0	4.8705	0	0.995333
gi|113677312|ref|NM_001044796.1| Danio rerio si:ch211-45m15.1 (si:ch211-45m15.1), mRNA	0	0	0	0	0	0.06325	0.439	0	0	0.818	0	0	0	0	0	0	0	0	0	0	0	0
gi|113677377|ref|NM_001045004.1| Danio rerio EH-domain containing 3 (ehd3), mRNA	0	0	0.04	0	0.566	0.09675	0	0	0	0.523	0.128	0	0	0.49	0	0.231	0	0	0	0	0	0.213333
gi|113677433|ref|NM_001044991.1| Danio rerio non-SMC condensin II complex, subunit H2 (ncaph2), mRNA	1.026	0.891	0.762	1.1075	1.2025	2.368	1.172	1.209	2.561	0.909	0.356	1.83	0.148	0.227	0	1.123	1.912	1.345	3.991	0.3475	0.218	7.977
gi|113677478|ref|NM_001044820.1| Danio rerio transformed 3T3 cell double minute 1 homolog (mouse) (mdm1), mRNA	0.314	0.095	0	0	0	0.02275	0	0	0	0.195	0	0	0	0	0	0	0	0	0.1525	0.523	0	0.895667
gi|113677489|ref|NM_001044818.1| Danio rerio family with sequence similarity 20, member B (H. sapiens) (fam20b), mRNA	2.138	2.507	1.66775	0.998	3.855	1.252	3.003	2.16	1.001	1.8	2.319	4.408	4.764	4.794	0.953	3.176	0.913	0	1.761	0.3975	1.5115	0.873
gi|113677549|ref|NM_001044952.1| Danio rerio si:dkey-204f11.59 (si:dkey-204f11.59), mRNA	0	0	0	0	0	0	0.156	0	0	0	0	0	0	0	0	0	0	0	0.032	0	0.3155	0
gi|113677593|ref|NM_001044942.1| Danio rerio poly (ADP-ribose) polymerase family, member 1 (parp1), mRNA	1.695	1.627	0.4365	1.4415	1.957	1.5545	1.814	3.365	1.12	2.213	2.114	0.209	1.347	0.069	0	0.293	0.873	1.348	4.229	0.3765	1.517	2.102
gi|113677604|ref|NM_001044920.1| Danio rerio si:dkey-14a7.4 (si:dkey-14a7.4), mRNA	0	0	0	0	0.064	0	0	0	0	0	0	0	0	0	0	0	0	0	0	0	0	0
gi|113677635|ref|NM_001044903.1| Danio rerio si:ch211-147h1.3 (si:ch211-147h1.3), mRNA	0.336	0	0.04425	0	0	0	0	0	0	0	0	0.437	0.563	0.043	0	0	0	0	0.6105	0	0	0.24
gi|113677667|ref|NM_001044916.1| Danio rerio si:dkey-14a7.1 (si:dkey-14a7.1), mRNA	0	0	0	0	0	0	0	0	0	0	0	0	0	0	0	0	0	0	0	0	0	0.410667
gi|113677720|ref|NM_001044889.1| Danio rerio si:dkey-61p9.7 (si:dkey-61p9.7), mRNA	0	0	0	0	0	0	0	0	0	0	0	0	0	0	0	0	0	0	0	0	0	0.732333
gi|113677735|ref|NM_001044886.1| Danio rerio si:ch211-240l14.1 (si:ch211-240l14.1), mRNA	0	0	0	0	0.918	0	0.362	1.281	0	0	0	0	0.729	0	0	0	0	0	0	0	0.096	0
gi|113677822|ref|NM_001044851.1| Danio rerio glutamate receptor interacting protein 1 (grip1), mRNA	3.163	0.12	0.131	0	0.623	0.128	0.231	0.582	0.216	0.49	0.72	0	0.398	0.077	1.336	0.108	0.161	0.64	1.4405	0.0165	0.7125	0.503333
gi|113677836|ref|NM_001044785.1| Danio rerio TAF1 RNA polymerase II, TATA box binding protein (TBP)-associated factor (taf1), mRNA	8.017	4.41	11.4142	2.6875	8.5775	6.60875	7.16	6.942	3.484	5.716	3.048	4.977	8.396	5.727	3.855	5.85	8.446	6.62	14.54	6.5165	5.9675	5.21167
gi|113677868|ref|NM_001044786.1| Danio rerio si:ch211-197i12.3 (si:ch211-197i12.3), mRNA	18.13	6.381	7.6665	4.2785	12.2085	3.08725	9.857	23.618	4.168	12.428	16.132	17.491	17.442	13.187	19.674	16.188	4.234	11.841	8.6575	4.596	4.6605	0.486667
gi|113677883|ref|NM_001044784.1| Danio rerio zgc:162780 (zgc:162780), mRNA	1.336	5.886	4.1235	5.4865	3.8465	2.984	11.793	4.329	10.208	4.763	1.825	0	3.024	2.717	0	1.827	9.434	2.342	5.0995	1.375	4.8745	1.39233
gi|113677905|ref|NM_001044789.1| Danio rerio neuro-oncological ventral antigen 1 (nova1), mRNA	0.91	0	0.219	0	0.6835	0	0.152	0	0	0.282	0	0	0	0	0	0	0	0	0	2.354	0.153	0.186667
gi|113677932|ref|NM_001044804.1| Danio rerio cholinergic receptor, nicotinic, alpha 10 (chrna10), mRNA	0	0	0	0	0	0.11775	0.428	0	0	0.133	0	0	0	0	0	0	0.233	0.924	0	0	0	0
gi|113677950|ref|NM_001044795.1| Danio rerio si:dkeyp-89d7.2 (si:dkeyp-89d7.2), mRNA	0	0	0	0	0	0	0	0	0	0	0	0	0	0	0	0.295	0	0.146	0	0	0	0.012
gi|113677971|ref|NM_001044808.1| Danio rerio si:dkey-21e2.16 (si:dkey-21e2.16), mRNA	0	0	0	0	0	0	0	0	0	0	0	0	0	0	0	0	0	0	0	0	0	0.452667
gi|113677985|ref|NM_001044799.1| Danio rerio stromal interaction molecule 1a (stim1a), mRNA	0.925	0.422	0.78125	0.4845	2.1175	1.18625	1.117	2.589	0.442	3.872	3.722	0	0	0.045	0	0.633	0.188	0.998	2.917	0.351	3.3335	5.07467
gi|113677987|ref|NM_001044823.1| Danio rerio connexin 39.4 (cx39.4), mRNA	15.839	75.629	78.823	98.6825	379.656	76.1475	99.184	477.605	129.171	168.631	412.083	0	1.66	1.79	3.43	9.39	15.958	17.269	0	3.991	1.989	0
gi|113678035|ref|NM_001044826.1| Danio rerio ataxin 1a (atxn1a), mRNA	0.578	0.352	0.538	0.303	0.274	0.3445	0.289	0.17	0.632	0.538	0.088	0.226	0.145	0.224	0	0	0.079	0	0.6425	0	0.059	0.356333
gi|113678037|ref|NM_001044827.1| Danio rerio transient receptor potential cation channel, subfamily C, member 5 (trpc5), mRNA	0	0	0.009	0	0	0	0	0	0.077	0	0	0	0	0	0	0	0	0	0	0	0.075	0.743
gi|113678051|ref|NM_001044842.1| Danio rerio si:dkey-284p5.3 (si:dkey-284p5.3), mRNA	0	0	0	0	0	0	0	0	0	0	0	0	0	0	0	0	0	0	0	0	0	0
gi|113678080|ref|NM_001044850.1| Danio rerio tudor domain containing 5 (tdrd5), mRNA	0	0	0	0	0	0	0.035	0	0	0	0	0	0	0	0	0	0	0	0	0	0	6.38
gi|113678082|ref|NM_001044837.1| Danio rerio si:ch211-147a11.3 (si:ch211-147a11.3), mRNA	1.219	0.988	23.53	30.117	3.331	15.4503	3.52	1.915	7.985	0.252	1.481	0	52.732	6.769	4.223	11.561	1.766	1.096	5.3925	0.589	15.353	4.23933
gi|113678102|ref|NM_001044845.1| Danio rerio si:dkey-11n6.4 (si:dkey-11n6.4), mRNA	0	0	0.36175	0	0	0	0	0	0	0	0	0	0.423	0	0	0	0	0	0	0	0	0
gi|113678120|ref|NM_001044859.1| Danio rerio si:ch211-15d5.5 (si:ch211-15d5.5), mRNA	6.209	7.549	5.1315	6.4745	4.014	6.6	10.345	9.314	4.93	11.902	6.857	6.604	9.087	14.653	12.322	10.502	15.335	4.872	3.9985	19.0645	3.023	26.183
gi|113678123|ref|NM_001044854.1| Danio rerio similar to Carnitine O-palmitoyltransferase I, mitochondrial liver isoform (CPT I) (CPTI-L) (Carnitine palmitoyltransferase 1A) (LOC558088), nuclear gene encoding mitochondrial protein, mRNA	0.822	1.749	1.22225	1.7905	2.8175	1.22925	2.146	2.422	0.598	1.869	2.746	1.069	5.238	3.344	1.851	4.799	0.968	1.7	3.1455	0.677	0.8455	1.472
gi|113678136|ref|NM_001044861.1| Danio rerio alanyl (membrane) aminopeptidase a (anpepa), mRNA	0	0	0.12775	0.0515	0.094	0.05425	0.131	0.231	0.054	0	0.119	0	0.198	0	0	0.107	0.853	0	0.0535	0	0.132	7.49967
gi|113678139|ref|NM_001044858.1| Danio rerio si:ch211-51m24.3 (si:ch211-51m24.3), mRNA	12.521	6.838	5.57125	2.5875	7.493	3.80725	7.478	9.692	1.767	6.646	2.578	4.552	6.619	5.427	4.633	5.574	5.564	5.896	10.846	6.311	3.5305	7.07067
gi|113678159|ref|NM_001044865.1| Danio rerio choline kinase alpha (chka), mRNA	0.31	0.629	0.244	0.054	0.2115	0.25575	1.241	1.097	0.452	1.283	3.959	0.081	0.104	0.722	2.043	2.831	4.778	3.349	0.791	0.034	2.88	3.40633
gi|113678161|ref|NM_001044860.1| Danio rerio si:ch211-173p18.9 (si:ch211-173p18.9), mRNA	0	0	0.1985	0	0	0.12925	0.896	0	0.245	0.556	0	0	0	0.174	0	0.49	0	0	0.1825	0.074	0.3645	0
gi|113678174|ref|NM_001044870.1| Danio rerio si:dkey-42i9.6 (si:dkey-42i9.6), mRNA	4.923	0.869	0.6485	0.2495	0.7775	0.79725	0.423	0.936	0.26	1.28	1.543	7.061	7.031	2.646	5.778	3.129	1.64	0.6	2.3765	6.9085	1.213	12.5423
gi|113678176|ref|NM_001044862.1| Danio rerio si:dkey-12o15.1 (si:dkey-12o15.1), mRNA	1.379	0	0.05675	0	0.0315	0.14525	0.23	0.116	0.054	0.428	0.419	0.154	0	0	0	0	1.445	0.053	0.151	0.185	0.2125	0.135667
gi|113678190|ref|NM_001044875.1| Danio rerio synemin, intermediate filament protein (synm), mRNA	0.632	0.064	0.20925	0.2205	0.1165	0	0.175	0.248	0.287	0.065	0.384	0	0	0	0	0	0.057	0.398	0.264	0	0.2975	1.92367
gi|113678244|ref|NM_001044873.1| Danio rerio si:dkey-78l4.14 (si:dkey-78l4.14), mRNA	0	0.249	0.26175	0.745	0.3225	0.31925	0.682	0.482	0	0	0.249	0	0	0.793	0.425	0.448	0.667	0.442	0.6195	1.133	0.7165	15.51
gi|113678251|ref|NM_001044883.1| Danio rerio cystic fibrosis transmembrane conductance regulator, ATP-binding cassette (sub-family C, member 7) (cftr), mRNA	0	0	0.0715	0.04	0.096	0	0.203	0.09	0	0.047	0.092	0.653	3.752	2.005	6.486	4.331	0.165	0.287	0.139	0.1475	0.062	0.0546667
gi|113678253|ref|NM_001044876.1| Danio rerio similar to NOD3 protein (LOC558818), mRNA	0	0	0	0	0	0	0	0	0	0	0	0	0	0	0	0	0	0	0	0	0	0.00333333
gi|113678270|ref|NM_001044887.1| Danio rerio zinc finger and BTB domain containing 12, tandem duplicate 1 (zbtb12.1), mRNA	0	0	0	0	0	0	0	0	0	0	0	0	0	0	0	0	0	0	0	0	0	0
gi|113678296|ref|NM_001044888.1| Danio rerio nudix (nucleoside diphosphate linked moiety X)-type motif 14 (nudt14), mRNA	0.465	2.829	1.45875	2.425	3.152	1.36925	1.085	0.548	0.508	0.866	1.131	5.807	7.023	9.376	7.256	6.112	3.793	1.255	0	0	0.2465	0.643333
gi|113678298|ref|NM_001044885.1| Danio rerio kelch-like 38 (Drosophila) (klhl38), mRNA	0	0	0.4265	0.454	0.243	0	0.065	0	0.106	0.12	0.47	0	0	0	0	0	0.21	0	0	0	0	0
gi|113678323|ref|NM_001044884.1| Danio rerio zinc finger and BTB domain containing 12, tandem duplicate 2 (zbtb12.2), mRNA	6.029	2.592	1.797	1.386	9.033	0.84025	3.234	5.892	0.883	4.651	6.877	0.344	6.214	3.988	0.917	5.955	1.119	0.793	6.1385	8.363	6.841	0
gi|113678341|ref|NM_001044896.1| Danio rerio ubiquitin specific peptidase 49 (usp49), mRNA	0.148	0.09	0	0	0	0	0.049	0.525	0.081	0	0.27	1.157	0	0.69	0.771	0	0	0.16	0	0	0	0.094
gi|113678367|ref|NM_001044894.1| Danio rerio si:dkey-117n7.5 (si:dkey-117n7.5), mRNA	0	0	0	0	0	0.393	0	0	0	0	0	0	0	0	0	0	0	0	0.136	0	0	0
gi|113678388|ref|NM_001044892.1| Danio rerio chondroitin sulfate proteoglycan 5b (cspg5b), mRNA	1.496	0.227	0.24825	0.5365	0.326	0.054	0.935	0.22	0.102	0.464	0.114	0	0.564	0	0	0	0	0	0.127	1.1525	1.256	1.04067
gi|113678408|ref|NM_001044901.1| Danio rerio superkiller viralicidic activity 2 (S. cerevisiae homolog)-like (skiv2l), mRNA	0.824	0.501	1.47925	3.558	2.6615	9.23825	2.869	3.454	2.5	3.124	1.724	0.5	2.488	2.129	1.142	2.606	3.235	0.494	5.4195	1.826	1.6725	1.84233
gi|113678431|ref|NM_001044816.1| Danio rerio si:ch211-146f4.4 (si:ch211-146f4.4), mRNA	0.402	0	0.051	0.943	0.1285	0.12625	0.939	1.423	0.439	1.996	0.244	0	0	0.468	0	0.44	0	0	0.383	0	0.434	0.663333
gi|113678457|ref|NM_001044913.1| Danio rerio vitellogenin 2 (vtg2), transcript variant 1, mRNA	0.068	0	0	0	0	0	0	0	0	0	0	0	0	0	0	0	0	0	0	0	0	1.06867
gi|113678477|ref|NM_001044807.1| Danio rerio neuroblastoma amplified sequence (nbas), mRNA	0.238	0.55	1.088	0.125	0.4365	0.4245	0.889	0.225	0.546	1.093	0.492	0.149	0.575	0.092	0	0.313	0.492	1.748	0.5495	0	0.977	1.383
gi|113678489|ref|NM_001044819.1| Danio rerio SAM and SH3 domain containing 1a (sash1a), mRNA	1.235	0.751	1.5485	1.167	0.88	0.96675	2.135	1.178	1.027	1.714	2.214	2.385	1.597	2.574	2.2	2.381	0.447	1.237	1.8665	1.3405	4.158	2.91933
gi|113678491|ref|NM_001044914.1| Danio rerio tripartite motif-containing 8 (trim8), mRNA	6.969	7.402	3.22875	1.141	2.3945	5.18475	7.974	4.651	2.292	6.145	4.08	9.235	6.337	10.314	8.903	7.076	3.057	5.844	11.33	5.8355	4.184	1.95433
gi|113678500|ref|NM_001044907.1| Danio rerio si:dkey-19f23.2 (si:dkey-19f23.2), mRNA	0.351	3.41	0.7615	0	0.1385	0.2975	2.161	0.62	1.436	0.979	1.704	0.273	0.529	0.951	2.551	1.343	4.858	0.851	0.364	0.029	0.443	19.2573
gi|113678543|ref|NM_001044917.1| Danio rerio dishevelled, dsh homolog 1b (Drosophila) (dvl1b), mRNA	0.639	0	0	0	0	0	0	0	0	0.198	0.194	0	0	0	0	0	0	0	0	0	0.065	0.0776667
gi|113678545|ref|NM_001044926.1| Danio rerio si:ch211-15i6.4 (si:ch211-15i6.4), mRNA	0.427	0.519	0.382	0.592	0.293	0.351	1.279	0.503	0.078	1.587	0.691	0	0.429	0.055	0.739	0.467	0.077	0.844	1.818	0.576	0.4575	0.885667
gi|113678558|ref|NM_001044925.1| Danio rerio si:dkey-190l1.1 (si:dkey-190l1.1), mRNA	3.825	0.375	1.0705	0.708	1.248	0.48575	1.069	3.491	1.145	2.832	2.398	0	0.745	0.143	0	0.675	0.335	1.864	1.808	1.171	1.0755	1.549
gi|113678576|ref|NM_001044919.1| Danio rerio transmembrane and coiled-coil domain family 2 (tmcc2), mRNA	2.411	0.105	0.1945	0.3135	0.3005	0	0.516	0.203	0	0.32	0.105	0	0	0.334	0	0	1.029	3.995	1.771	2.1905	0	0.0726667
gi|113678578|ref|NM_001044927.1| Danio rerio Ets2 repressor factor (erf), mRNA	2.295	3.69	1.55725	0.714	3.061	0.649	8.337	4.885	1.536	6.105	13.982	2.483	5.139	7.399	7.464	7.291	6.435	6.989	4.436	0.729	7.7285	2.47667
gi|113678603|ref|NM_001044928.1| Danio rerio protein tyrosine phosphatase, non-receptor type 23, b (ptpn23b), mRNA	0.68	0.155	0.02825	0.0445	0.027	0.1245	0	0.2	0.046	0.211	0.052	0.531	0	0.165	0	0.652	0.092	0.688	0.411	0.852	0.308	2.67933
gi|113678623|ref|NM_001044940.1| Danio rerio si:rp71-45k5.2 (si:rp71-45k5.2), mRNA	0	0	0.13825	0	0	0	0.112	0	0.184	0	0	0	0	0.392	11.206	2.581	0	0	0.046	0	0.5005	1.359
gi|113678626|ref|NM_001044930.1| Danio rerio zgc:123116 (zgc:123116), mRNA	1.574	0	0	0	0	0	0	0	0	0	0.08	0	0	0	0	0.144	0	0	0.438	0	0	0
gi|113678643|ref|NM_001044932.1| Danio rerio integrator complex subunit 3 (ints3), mRNA	4.457	3.399	3.43475	1.0165	2.845	1.87275	4.483	6.495	1.637	3.267	2.067	3.666	3.017	2.732	2.19	3.548	1.365	3.848	5.198	2.032	2.693	8.75867
gi|113678645|ref|NM_001044949.1| Danio rerio death-associated protein 6 (daxx), mRNA	3.116	0.606	0.47025	1.1035	0.905	0.83925	0.872	1.469	0.34	1.468	0.53	0.486	1.756	0.29	0	0.546	0.068	0.067	1.398	0.694	0.584	6.47433
gi|113678662|ref|NM_001044951.1| Danio rerio eukaryotic translation initiation factor 3, subunit E, b (eif3eb), mRNA	0.179	2.503	1.01175	1.312	3.0435	2.368	2.744	5.908	1.173	4.774	3.479	1.955	2.882	3.815	8.746	5.486	1.459	3.573	2.651	0.1595	1.516	5.18433
gi|113678675|ref|NM_001044945.1| Danio rerio SIN3 homolog B, transcription regulator (yeast) (sin3b), mRNA	2.235	1.578	3.37675	2.467	4.5255	1.09075	3.219	1.87	1.063	3.532	1.971	0.675	2.467	1.285	2.174	1.815	3.8	0.583	4.3995	2.5015	5.787	5.38267
gi|113678677|ref|NM_001044954.1| Danio rerio kinesin family member C1-like (LOC561143), mRNA	10.622	3.794	1.34525	0.0695	2.937	2.00525	4.955	5.633	1.16	1.647	0.081	7.456	1.47	1.801	0.966	1.017	0.721	0	9.075	3.373	1.157	12.6867
gi|113678692|ref|NM_001044947.1| Danio rerio si:rp71-45k5.3 (si:rp71-45k5.3), mRNA	0	0	0	0	0	0	0.181	0	0	0	0	0	0	0	0	0.594	0	0	0	0	0	3.365
gi|113678694|ref|NM_001044958.1| Danio rerio similar to tripartite motif-containing 35 (LOC561381), mRNA	0	0	0	0	0	0	0	0	0	0	0	0	0	0	0	0	0	0.483	0	0	0	0
gi|113678709|ref|NM_001044959.1| Danio rerio si:ch211-132b12.8 (si:ch211-132b12.8), mRNA	2.736	0.594	0.37025	0.458	0.3995	0.265	1.563	0.461	0.107	1.333	1.068	2.134	0.786	0.984	1.625	1.069	0.637	1.476	0.698	0	0.418	88.8413
gi|113678711|ref|NM_001044953.1| Danio rerio si:dkey-149j18.2 (si:dkey-149j18.2), mRNA	4.406	4.101	2.5765	1.689	4.5235	3.501	2.294	4.219	2.18	2.305	2.759	2.685	2.355	2.4	0.572	1.356	1.646	2.525	2.6695	2.5765	2.3215	1.62133
gi|113678731|ref|NM_001044955.1| Danio rerio JAZF zinc finger 1a (jazf1a), mRNA	0	0	0	0	0.311	0	0	0	0	0	0	0	0	0	0	0	0	0	0	0	0	0.134667
gi|113678760|ref|NM_001044961.1| Danio rerio similar to tripartite motif-containing 35 (LOC561453), mRNA	0	0	0	0	0	0	0	0	0	0	0	0	0	0	0	0	0	0	0	0	0	0
gi|113678763|ref|NM_001044968.1| Danio rerio phospholipase C, gamma 2 (plcg2), mRNA	0.079	0.336	0.0885	0.6375	0.4375	0.856	0.553	2.141	0.302	0.392	0.384	4.127	0	0.031	0.493	0.173	0.086	0.256	0.164	0	0.18	1.47433
gi|113678781|ref|NM_001044964.1| Danio rerio similar to tripartite motif-containing 35 (LOC561579), mRNA	0	0	0	0	0	0	0	0	0	0	0	0	0	0	0	0	0	0	0	0	0	0.153333
gi|113678783|ref|NM_001044969.1| Danio rerio CDC28 protein kinase regulatory subunit 2 (cks2), mRNA	1.352	2.739	0.114	0.236	2.282	2.87675	3.453	1.593	0.246	1.397	1.095	1.757	0.907	1.92	0	2.465	0.245	0	3.6635	1.321	1.274	6.95933
gi|113678793|ref|NM_001045438.1| Danio rerio transmembrane protein 14C (tmem14c), mRNA	6.145	33.624	0.80075	1.609	3.2055	3.9135	45.461	21.005	10.401	19.056	4.852	11.504	1.237	38.099	51.746	12.107	24.71	56.696	4.818	5.2245	2.7155	13.7543
gi|113678797|ref|NM_001044967.1| Danio rerio si:dkey-222f8.3 (si:dkey-222f8.3), mRNA	1.581	1.923	0.15	2.632	8.4835	1.4415	1.91	6.757	3.346	4.046	4.803	8.326	15.117	12.715	19.522	14.28	0.967	0	2.9965	0	1.4325	3.42
gi|113678812|ref|NM_001044846.1| Danio rerio SLAIN motif family, member 2 (slain2), mRNA	6.048	4.109	1.77825	0.976	5.958	7.286	3.201	7.548	0.777	2.979	2.269	5.689	8.233	4.618	3.329	4.867	1.836	5.95	6.7905	5.4515	2.8645	2.12967
gi|113678819|ref|NM_001044970.1| Danio rerio si:dkey-103i16.1 (si:dkey-103i16.1), mRNA	2.071	2.015	2.75525	1.1035	5.3875	1.5	2.54	4.004	1.99	3.392	5.385	0.646	1.084	0.995	0.345	1.723	4.772	3.487	3.964	2.206	2.699	2.41533
gi|113678835|ref|NM_001044972.1| Danio rerio si:dkey-218h11.4 (si:dkey-218h11.4), mRNA	0	2.343	0.3555	0.471	0.42	0.26025	3.25	4.4	0.986	2.315	3.657	3.757	1.212	0.84	3.505	0.923	0.262	0.455	2.447	1.2025	1.841	5.50467
gi|113678837|ref|NM_001044973.1| Danio rerio SHC (Src homology 2 domain containing) transforming protein 2 (shc2), mRNA	0.194	0	0.242	0.3045	1.896	0.73375	0.129	0.914	0.529	0.481	1.414	2.269	7.806	8.267	2.218	7.005	0.632	0	0	0	0	0.222667
gi|113678862|ref|NM_001044971.1| Danio rerio bone morphogenetic protein 8a (bmp8a), mRNA	1.747	2.921	0.4725	0.1145	0.1395	0.53725	1.529	1.03	0.119	0.135	0.265	4.771	2.198	3.893	2.044	1.913	0.475	0	1.3015	0.072	1.201	0.790667
gi|113678880|ref|NM_001044975.1| Danio rerio si:dkeyp-66g8.1 (si:dkeyp-66g8.1), mRNA	1.225	0.319	1.6555	0.1835	0.966	1.7175	0.642	0	0.382	1.845	0.532	0.819	0.704	0.814	0	0.383	0.285	0.661	1.9565	0.467	0.659	0.382
gi|113678898|ref|NM_001044976.1| Danio rerio kinesin family member 14 (kif14), mRNA	1.481	0.19	0.26025	0.1635	0.763	0.54875	0.494	0.551	0.213	0.29	0.095	0.547	0.157	0.091	0.081	0.171	0.296	1.178	1.1375	0.2335	0.1775	4.20133
gi|113678903|ref|NM_001044981.1| Danio rerio si:dkey-6n6.4 (si:dkey-6n6.4), nuclear gene encoding mitochondrial protein, mRNA	52.381	131.165	68.775	26.7965	89.7865	63.0125	118.58	113.184	70.358	67.033	102.516	95.333	154.769	153.83	44.512	92.821	119.947	98.463	53.8705	15.192	63.436	15.1077
gi|113678914|ref|NM_001044983.1| Danio rerio si:dkey-8l13.1 (si:dkey-8l13.1), mRNA	1.889	2.526	0.25925	0.198	2.084	1.41575	1.007	0.89	0.412	0.937	0.459	0	2.281	3.074	8.247	2.481	0.411	0.204	0.579	0.1865	0.5075	29.4487
gi|113678916|ref|NM_001044986.1| Danio rerio si:dkey-8l13.4 (si:dkey-8l13.4), mRNA	0.663	0.242	0.49025	0.519	0.398	0.30925	0.972	0	0.145	0.576	0.483	4.034	1.067	0.771	0	1.016	0.288	2.075	1.9125	0.6555	0.518	2.66667
gi|113678932|ref|NM_001044984.1| Danio rerio protein tyrosine phosphatase-like A domain containing 1 (ptplad1), mRNA	3.004	3.165	2.718	3.131	5.125	5.07925	5.405	2.596	2.624	1.987	2.554	3.905	2.216	1.629	4.163	3.945	0.979	0.972	5.1645	0.7525	3.058	6.008
gi|113678934|ref|NM_001044985.1| Danio rerio si:dkey-72l14.3 (si:dkey-72l14.3), mRNA	0	0.366	0.20675	0.5475	0	0.22425	0.551	0.355	0.329	0	0	0.117	0.151	0	0	0	0.082	0.081	0	0.912	0.202	0.00333333
gi|113678949|ref|NM_001045425.1| Danio rerio adiponectin, C1Q and collagen domain containing, like (adipoql), mRNA	0	0	0	0	0	0	0	0	0	0	0	0	0	0	0	0	0	0	0	0	0	0.221333
gi|113678958|ref|NM_001045423.1| Danio rerio zgc:153116 (zgc:153116), mRNA	0.881	0.179	0	0	0	0.18425	0.098	0.346	0.16	0.364	0.178	0	0	0	0.611	0.321	0	0.158	0	0.5515	0.1975	0
gi|113678962|ref|NM_001045424.1| Danio rerio zgc:153631 (zgc:153631), mRNA	0.417	0.633	0.214	0.109	0	0.44175	0.069	0.491	0.455	0	2.025	0	0.419	0.404	0.217	1.14	0.566	1.686	0.55	0.7275	1.116	2.844
gi|113678966|ref|NM_001045421.1| Danio rerio zgc:153395 (zgc:153395), mRNA	0	0	0	0	0	0	0	0	0	0.815	0	0	0	0	0	0	0	0	0	0	0	0.360333
gi|113678969|ref|NM_001045422.1| Danio rerio duboraya (dub), mRNA	0.465	1.131	0	0	0	0	0	0	0	0.144	0	0	2.573	4.144	13.052	15.014	0.126	0.125	0.158	0.3755	0	1.47867
gi|113678980|ref|NM_001045420.1| Danio rerio fatty acid 2-hydroxylase (fa2h), mRNA	0.33	0.201	0	0	0	0.0475	0.66	0.779	0	0.41	0	0	0	0.896	1.03	0	0	1.069	0	1.948	0	0.527
gi|113678993|ref|NM_001045416.1| Danio rerio spleen focus forming virus (SFFV) proviral integration oncogene spi1 like (spi1l), mRNA	0.319	0.194	0.01375	0	0.102	0.05	0.16	0	0.261	0.198	0.872	8.961	0.161	0.371	0.995	0.699	0.26	0.861	0.381	0.0525	0.296	0.334
gi|113678995|ref|NM_001045414.1| Danio rerio zgc:153146 (zgc:153146), mRNA	0	0	0	0	0	0	0	0	0	0	0	0	0	0	0	0	0	0	0	0	0	0.569667
gi|113679002|ref|NM_001045418.1| Danio rerio zgc:152916 (zgc:152916), mRNA	0	0.269	0	0	0	0	0.074	0.26	0.241	0.274	0.671	0	0.222	0	0	0	0.12	0.953	0.2485	0	0.234	0.577667
gi|113679004|ref|NM_001045415.1| Danio rerio lipocalin 15 (lcn15), mRNA	0	0	0	0	0	0	0	0	0	0	0	0	0	0	0	0	0	0	0	0.048	0	0.937667
gi|113679007|ref|NM_001045413.1| Danio rerio zgc:153154 (zgc:153154), mRNA	0	0	0.064	0	0	0	0.45	0.319	0	0.838	1.149	0.633	0	0	0	0	0.147	1.896	0	0	0.325	34.4577
gi|113679018|ref|NM_001045417.1| Danio rerio zgc:152936 (zgc:152936), mRNA	0	1.065	0	0	0	0	2.529	2.064	0	1.086	0	0	0	2.715	2.428	0.639	0.952	2.835	0.0795	0	0	381.13
gi|113679020|ref|NM_001045410.1| Danio rerio transmembrane protein 150A (tmem150a), mRNA	0.231	0.844	0.815	0.9055	0.7645	0.8435	1.157	2.727	0.758	1.866	1.968	0.541	3.26	1.255	0.962	2.026	0.377	2.122	1.352	0.1675	0.5605	1.19567
gi|113679023|ref|NM_001045412.1| Danio rerio tetraspanin 14 (tspan14), mRNA	0.947	2.015	0.071	0.431	0.782	0	0.631	3.069	0.517	0.147	1.15	0	0.953	1.468	0.984	2.332	0.9	1.533	0.74	0.156	0.925	3.63933
gi|113679025|ref|NM_001045407.1| Danio rerio zgc:153325 (zgc:153325), mRNA	0	0	0	0	0	0	0	0	0	0	0	0	0	0	0	0	0	0	0	0	0	0
gi|113679027|ref|NM_001045411.1| Danio rerio zgc:153256 (zgc:153256), mRNA	0	0	0	0	0	0	0.352	0	0	0	0	0	0	0	0	0	0	0	0	0	0	0.652
gi|113679037|ref|NM_001045408.1| Danio rerio zgc:153659 (zgc:153659), mRNA	0	0	0.20975	0	0	0.05175	0.239	0	0	0	0.436	0	0	0.278	0	0	0	0	0.146	0	0	0.0793333
gi|113679039|ref|NM_001045409.1| Danio rerio zgc:153284 (zgc:153284), mRNA	2.184	0	0	0	0	0	0	0	0.397	0	0	0	0	0	0	0	0	0	0.099	0	0	20.4227
gi|113679067|ref|NM_001045403.1| Danio rerio coiled-coil domain containing 126 (ccdc126), mRNA	1.938	3.535	0.55375	1.1815	2.821	1.582	3.23	2.539	1.293	3.473	2.486	6.888	9.319	8.596	2.687	6.601	1.404	1.162	2.6755	0.93	1.759	3.004
gi|113679069|ref|NM_001045404.1| Danio rerio coenzyme Q6 homolog, monooxygenase (S. cerevisiae) (coq6), nuclear gene encoding mitochondrial protein, mRNA	19.765	17.214	20.5953	18.6945	34.105	29.6537	30.524	27.551	14.733	27.815	20.662	16.454	8.414	19.219	18.175	17.888	9.81	26.761	25.453	5.9115	29.316	4.63567
gi|113679085|ref|NM_001045402.1| Danio rerio chromobox homolog 3a (HP1 gamma homolog, Drosophila) (cbx3a), mRNA	2.234	3.848	0.31175	0.195	1.293	0.59025	1.613	1.756	1.626	2.309	1.357	2.614	2.248	3.751	4.645	2.853	1.619	1.607	0.3615	0.27	0.4545	22.4537
gi|113679087|ref|NM_001045401.1| Danio rerio zgc:153411 (zgc:153411), mRNA	44.708	215.752	208.635	187.053	125.722	245.591	265.626	89.362	57.497	286.843	101.761	67.048	37.565	83.222	55.099	62.301	109.694	108.295	170.313	176.963	325.83	0.926667
gi|113679100|ref|NM_001045400.1| Danio rerio zgc:153443 (zgc:153443), mRNA	0	0	0	0	0	0	0	0	0	0.195	0	0.982	0	0	0	0	0.513	4.754	0	0.56	0.25	0.233
gi|113679102|ref|NM_001045398.1| Danio rerio F-box protein 36 (fbxo36), mRNA	0	0	0	0	0	0	0	0	0	0.218	0	0	0	0	0	0	0	0	0	0	0	0.577667
gi|113679115|ref|NM_001045397.1| Danio rerio si:dkey-6n6.2 (si:dkey-6n6.2), mRNA	1.668	0.29	0.51175	0.2495	2.217	2.95975	0.238	1.123	0.52	0.148	1.302	0.186	0	0	0	0.261	0	0	0.162	0.432	0.2905	0.397667
gi|113679117|ref|NM_001045399.1| Danio rerio zgc:153733 (zgc:153733), mRNA	0.266	0	0	0	0	0.08325	0	0	0	0	0	0	0	0.206	0	0.581	0	0	0	0	0	1.08567
gi|113679131|ref|NM_001045395.1| Danio rerio zgc:153569 (zgc:153569), mRNA	1.733	2.341	1.98575	0.907	2.0015	0.929	2.951	4.992	1.051	5.134	3.859	4.355	10.073	7.385	12.809	7.797	4.812	2.701	2.836	0.5205	3.55	0.867333
gi|113679133|ref|NM_001045396.1| Danio rerio zgc:153172 (zgc:153172), mRNA	31.503	7.91	4.9345	3.398	12.2855	6.7635	10.193	8.61	6.605	6.937	5.824	16.738	19.754	8.934	18.51	12.992	16.374	14.533	15.0675	20.694	10.197	4.51533
gi|113679151|ref|NM_001045393.1| Danio rerio zgc:153044 (zgc:153044), mRNA	0	1.735	1.0145	0	1.1335	0.57275	1.427	0	0.519	2.656	0.578	0.371	1.436	1.475	3.957	4.166	0.517	0.257	2.3175	0.0785	1.6565	1.592
gi|113679167|ref|NM_001045389.1| Danio rerio zgc:153240 (zgc:153240), mRNA	4.243	3.583	2.195	1.781	2.539	3.67775	5.027	3.89	3.604	4.094	2.148	4.045	1.423	4.658	9.067	5.676	1.281	2.417	4.4425	0.7065	2.496	1.16567
gi|113679169|ref|NM_001045391.1| Danio rerio zgc:153512 (zgc:153512), mRNA	0.628	0.382	0.233	0.329	0.6955	1.5075	1.256	1.111	0.171	0.779	0.382	2.94	1.264	4.381	0.327	4.813	0.171	0	1.396	0	0.7995	2.12067
gi|113679182|ref|NM_001045388.1| Danio rerio zgc:153251 (zgc:153251), mRNA	0.393	2.629	0.1425	0.206	0.4945	0	2.62	0.927	0.215	1.95	1.671	2.759	1.582	4.265	3.269	2.581	0.214	0.212	0.7095	0.1945	1.3755	29.913
gi|113679184|ref|NM_001045390.1| Danio rerio zgc:153157 (zgc:153157), mRNA	0.305	0.185	0.01925	0	0	0	0	0	0	0.189	0	0	0.306	0.236	0	0	0	0	0	0	0	0
gi|113679199|ref|NM_001045386.1| Danio rerio UDP glucuronosyltransferase 5 family, polypeptide C2 (ugt5c2), mRNA	0	0	0	0	0	0	0	0	0	0	0	0	0	0	0	0	0	0	0	0	0	1.607
gi|113679201|ref|NM_001045387.1| Danio rerio zgc:153259 (zgc:153259), mRNA	5.534	0.336	0.79775	0.29	0.789	2.78525	1.199	1.304	1.057	2.917	1.344	0	0.835	0.536	0.288	1.211	0.601	0	1.729	0	1.11	3.50833
gi|113679218|ref|NM_001045384.1| Danio rerio coiled-coil domain containing 85C, a (ccdc85ca), mRNA	5.627	6.094	8.72	2.7585	1.61	2.198	6.446	2.694	2.592	10.579	5.02	0	0	0	2.194	0.77	2.389	5.218	12.86	7.29	10.7055	0.432333
gi|113679235|ref|NM_001045383.1| Danio rerio zgc:153311 (zgc:153311), mRNA	0	0.2	0.0285	0	0	0	0.22	0.389	0	0.409	0	0	0	0.128	0	0.361	0	0	0.1405	0	0	0.00733333
gi|113679237|ref|NM_001045382.1| Danio rerio zgc:153662 (zgc:153662), mRNA	0	0	0	0	0	0	0	0	0	0	0	0	0	0	0	0	0	0	0	0	0	5.15467
gi|113679252|ref|NM_001045380.1| Danio rerio zgc:153389 (zgc:153389), mRNA	0.92	5.034	5.68175	10.7995	6.0435	1.737	3.782	10.122	5.191	3.043	15.276	1.675	32.405	7.606	5.101	17.792	6.833	9.598	5.274	0.8695	14.519	1.57
gi|113679254|ref|NM_001045381.1| Danio rerio phosphotriesterase related (pter), mRNA	15.805	10.854	14.2903	2.6055	10.435	11.4223	18.043	7.934	8.309	13.795	13.511	5.707	10.013	3.402	2.434	14.736	40.555	13.265	42.648	13.792	35.3045	2.086
gi|113679268|ref|NM_001045378.1| Danio rerio zgc:153405 (zgc:153405), mRNA	0.933	0	0.0295	0	0	0	0	0	0	0	0	0	0	0	0	0	0	0	0	0.154	0.1235	0.181
gi|113679270|ref|NM_001045377.1| Danio rerio deleted in a mouse model of primary ciliary dyskinesia (dpcd), mRNA	3.574	0.198	0	1.442	0.4635	1.295	1.191	1.532	0	1.209	0.197	1.774	0	0.504	0	0.356	0.177	0	0.99	0.0535	0.3905	3.18133
gi|113679288|ref|NM_001045376.1| Danio rerio zgc:153417 (zgc:153417), mRNA	0	0	0.18025	0	0.3935	0.0845	0.138	0	0.113	1.159	0	0	0	0	0	0	6.43	17.249	0	0	0.4695	0
gi|113679331|ref|NM_001045373.1| Danio rerio calcitonin gene-related peptide-receptor component protein (crcp), mRNA	0.72	3.065	0.80775	1.9755	2.9665	1.72225	2.16	4.669	1.573	1.34	1.312	0.562	2.174	1.395	2.995	3.153	0.196	0.583	1.9495	1.21	2.597	3.71233
gi|113679346|ref|NM_001045371.1| Danio rerio H6 family homeobox 4 (hmx4), mRNA	4.927	9.128	2.29775	6.2535	5.3085	1.7605	13.993	11.06	12.68	8.002	11.969	0	0	0.273	0.244	1.027	2.04	4.936	8.901	3.27	7.4765	0.0676667
gi|113679349|ref|NM_001045370.1| Danio rerio ST6 (alpha-N-acetyl-neuraminyl-2,3-beta-galactosyl-1,3)-N-acetylgalactosaminide alpha-2,6-sialyltransferase 4 (st6galnac4), mRNA	0	0	0	0	0	0	0	0	0	0	0	0	0	0	0	0	0	0	0	0	0	0
gi|113679363|ref|NM_001045369.1| Danio rerio zgc:153184 (zgc:153184), mRNA	0	1.278	1.0775	0.1375	0.9515	0.196	1.051	0.619	0.574	3.422	1.117	2.255	1.586	2.647	1.366	2.013	0.999	1.134	1.6825	2.84	0.46	0.096
gi|113679366|ref|NM_001045368.1| Danio rerio transmembrane protein 86B (tmem86b), mRNA	0	0.15	0	0	0	0	0.041	0.145	0	0.076	0	0	0.124	0	0	0	1.069	0.265	0	0	0	4.32933
gi|113679376|ref|NM_001045363.1| Danio rerio wingless-type MMTV integration site family, member 9A (wnt9a), mRNA	3.881	5.111	3.18475	3.29	1.681	2.4185	13.47	0.381	1.059	16.846	4.518	0	0	0.376	0	0	2.811	12.038	8.441	0.373	8.883	0
gi|113679379|ref|NM_001045367.1| Danio rerio family with sequence similarity 169, member Aa (fam169aa), mRNA	0	0	0	0	0	0	0	0	0.099	0.225	0	0	0	0	0	0	0	0	0	0	0.144	0.856333
gi|113679394|ref|NM_001045364.1| Danio rerio Rho family GTPase 2 (rnd2), mRNA	3.015	17.964	0.8735	2.1205	24.5685	19.0395	30.345	27.01	3.128	12.903	15.568	4.939	0.91	28.508	26.957	0	10.814	34.814	2.423	4.084	1.1615	0
gi|113679397|ref|NM_001045365.1| Danio rerio zgc:153151 (zgc:153151), mRNA	0	0.284	0.01475	0	0	0	0	0	0	0	0	0	0	0.181	0	0	0	0	0.0635	0	0	0.018
gi|113679412|ref|NM_001045362.1| Danio rerio zgc:153260 (zgc:153260), mRNA	33.876	49.652	15.471	56.561	50.451	34.5388	32.164	47.584	48.137	29.931	16.63	22.804	40.156	35.422	18.331	15.237	20.425	11.267	15.752	15.796	8.1535	7.782
gi|113679415|ref|NM_001045366.1| Danio rerio si:dkeyp-84a8.8 (si:dkeyp-84a8.8), mRNA	4.005	1.686	0.30425	0.1615	1.2195	1.129	1.129	2.905	1.346	3.439	2.433	0.961	1.86	2.268	5.445	5.058	3.181	2.66	3.5215	0.975	1.775	7.67233
gi|113679418|ref|NM_001045359.1| Danio rerio mitochondrial ribosomal protein L20 (mrpl20), nuclear gene encoding mitochondrial protein, mRNA	181.021	70.249	27.4022	6.6035	76.3095	30.1212	74.864	50.27	40.885	55.978	25.303	56.865	51.399	67.834	24.231	58.624	55.244	31.038	72.813	54.6335	27.621	2.45667
gi|113679435|ref|NM_001045361.1| Danio rerio zgc:153273 (zgc:153273), mRNA	0	0	0	0	0	0	0	0	0	0	0	0	0	0	0	0	0	0	0	0	0	0
gi|113679438|ref|NM_001045357.1| Danio rerio zgc:153978 (zgc:153978), mRNA	2.472	1.503	0.039	0.3235	0	0.2515	1.441	0	0	1.15	1.126	6.747	1.243	4.788	5.781	1.353	13.766	9.001	1.9905	3.9705	1.7255	8.38267
gi|113679448|ref|NM_001045360.1| Danio rerio cytochrome b5 reductase 2 (cyb5r2), mRNA	0	0.16	0	0	0.084	0.0825	0.176	0	0	0.327	0.48	0	0	0.102	0.548	0.288	0	0.142	0	0.191	0	0.799
gi|113679450|ref|NM_001045356.1| Danio rerio zgc:153674 (zgc:153674), mRNA	0	0	0	0	0	0	0	0	0	0	0	0	0	0	0	0	0.214	0.426	0	0.286	0.1045	0.336
gi|113679464|ref|NM_001045358.1| Danio rerio mitochondrial ribosomal protein S14 (mrps14), nuclear gene encoding mitochondrial protein, mRNA	13.588	13.388	6.232	7.209	31.158	22.3648	11.866	14.358	18.673	9.88	7.968	13.157	8.958	9.44	4.384	13.846	4.074	10.112	15.6135	8.801	6.2195	8.41967
gi|113679467|ref|NM_001045354.1| Danio rerio asparagine-linked glycosylation 5 homolog (yeast, dolichyl-phosphate beta-glucosyltransferase) (alg5), mRNA	13.579	34.549	6.41025	18.447	14.8915	21.049	31.004	39.715	31.988	19.182	15.885	47.859	17.965	20.364	23.788	19.266	15.304	19.401	21.2045	9.5875	10.9165	9.11867
gi|113679478|ref|NM_001045355.1| Danio rerio zgc:153362 (zgc:153362), mRNA	6.148	19.755	11.7003	0.46	7.881	4.128	13.389	7.763	5.874	7.353	3.201	1.541	1.105	1.616	0	0.961	13.839	5.094	15.212	1.3385	16.959	15.5043
gi|113679481|ref|NM_001045352.1| Danio rerio exosome component 5 (exosc5), transcript variant 1, mRNA	17.562	5.619	2.50725	0.242	13.3465	6.114	6.622	5.992	3.028	4.873	3.93	3.965	4.65	3.94	6.246	9.105	2.26	3.241	7.9915	11.9245	2.2305	4.49067
gi|113679492|ref|NM_001045353.1| Danio rerio hairy and enhancer of split 2.2 (hes2.2), mRNA	1.221	1.856	0.01925	0	0.0975	0.4505	1.424	0	0.667	0	0	0	0	0.355	0	0	0.83	1.483	4.806	4.9	0.162	0.307
gi|113679494|ref|NM_001045350.1| Danio rerio zgc:153713 (zgc:153713), mRNA	16.229	26.951	24.0637	16.3155	31.649	36.7268	33.503	37.323	29.174	40.014	26.446	37.976	32.659	48.926	25.1	35.092	17.852	25.2	36.7285	21.9915	20.6475	1.07767
gi|113679505|ref|NM_001045348.1| Danio rerio glycerol-3-phosphate dehydrogenase 2 (mitochondrial) (gpd2), nuclear gene encoding mitochondrial protein, mRNA	0	0	0	0	0.149	0.195	0.053	0.187	0	0.098	0.096	0.866	0.159	0.369	0	0.173	0	0.428	0.1785	0	0	1.177
gi|113679513|ref|NM_001045351.1| Danio rerio zgc:153414 (zgc:153414), mRNA	0	0	0	0	0	0	0	0	0	0.805	0	0	0	0.126	0	0	0	0	0	0	0	0
gi|113679515|ref|NM_001045346.1| Danio rerio dehydrogenase/reductase (SDR family) member 7 (dhrs7), mRNA	3.285	1.332	2.1485	1.2155	4.151	5.82075	2.828	1.613	0.747	2.717	2.328	5.125	1.653	1.697	0	0.599	20.53	0.148	4.522	0	7.7385	0.335667
gi|113679532|ref|NM_001045343.1| Danio rerio si:ch211-117n7.7 (si:ch211-117n7.7), mRNA	0.546	0.166	3.27025	0.783	0.128	0	0.091	0.965	0.745	0	3.978	0	0	0.106	0	0	8.008	2.209	0.1855	0.045	2.156	3.65833
gi|113679534|ref|NM_001045347.1| Danio rerio zgc:153788 (zgc:153788), mRNA	0.314	0.573	0.154	0	0	0.2345	1.467	1.853	0	1.17	0.764	5.64	6.327	6.456	2.288	2.753	3.587	0.509	2.9165	0.052	0.8835	0.534333
gi|113679547|ref|NM_001045099.1| Danio rerio methenyltetrahydrofolate synthetase domain containing (mthfsd), mRNA	0	0	0	0	0	0	0	0	0	0	0	0	0	0	0	0	0	0	0	0	0	1.42833
gi|113679549|ref|NM_001045345.1| Danio rerio methyltransferase like 21D (mettl21d), mRNA	0	0	0	0	0.0945	0.103	0.197	0.349	0	1.651	0	0	0	0.229	0	0	0	0.16	0.7	0	0.434	0.281667
gi|113679562|ref|NM_001045344.1| Danio rerio zgc:153234 (zgc:153234), mRNA	0	1.438	0.26975	0	0	1.11225	0.525	0.619	0.717	0.652	0	0.41	0.264	0.204	0	0.575	0	0.425	0.658	0	0.1395	0.028
gi|113679564|ref|NM_001045430.1| Danio rerio zgc:153740 (zgc:153740), mRNA	0.296	0	0.05125	0	0	0	0	0	0	0	0	0	0	0	0	0	0	0	0	0	0	1.14567
gi|113679578|ref|NM_001045431.1| Danio rerio somatostatin 3 (sst3), mRNA	2.908	0.589	0	0	0.1545	0.59575	0.807	0	0.265	0.601	0.294	0.756	0	0.563	3.526	0	0	0.261	0.1975	0	0.1285	0.052
gi|113679605|ref|NM_001044805.1| Danio rerio neuronal cell adhesion molecule (nrcam), mRNA	0.262	0	0	0	0	0	0.029	0	0	0.054	0	0	0	0	0	0	0	0.047	0.437	0	0.0355	0.235
gi|113679613|ref|NM_001045470.1| Danio rerio family with sequence similarity 168, member A (fam168a), mRNA	29.329	186.032	9.39025	13.9305	10.3575	10.1995	211.948	195.328	29.709	136.309	149.38	15.71	36.977	96.664	130.402	88.567	48.386	216.001	73.722	17.117	35.8165	0.444333
gi|113679644|ref|NM_001045474.1| Danio rerio phorbol-12-myristate-13-acetate-induced protein 1 (pmaip1), mRNA	2.458	1.494	0	0	1.1535	0	1.638	5.794	0	0	2.986	15.339	4.947	3.81	5.111	2.69	0	0	0.334	3.6455	1	6.39267
gi|113679663|ref|NM_001045473.1| Danio rerio Bcl2 modifying factor 2 (bmf2), mRNA	0	0.595	0	0	0	0	0	0	0	0	0	0	0	0	0	0	0	0	0	0.1615	0	0
gi|113679669|ref|NM_001044742.1| Danio rerio immune-related, lectin-like receptor 3 (illr3), transcript variant 2, mRNA	0	0	0	0	0	0	0	0	0	0	0	0	0	0	0	0	0	0	0	0	0	0
gi|113679752|ref|NM_001045432.1| Danio rerio zgc:153691 (zgc:153691), mRNA	0.638	0.129	2.331	2.2165	3.021	2.03425	1.843	3.509	1.858	1.583	3.1	0.166	1.498	0.412	0	2.793	0.231	0	1.2465	0.07	1.286	0.376667
gi|113679760|ref|NM_001045433.1| Danio rerio zgc:153322 (zgc:153322), mRNA	0	0.266	0	0	0	0	1.165	0	0	0.271	0.531	1.023	0	1.186	1.818	0.478	0	0.472	0	0	0	0
gi|113679780|ref|NM_001044792.1| Danio rerio si:dkey-15j16.4 (si:dkey-15j16.4), transcript variant 2, mRNA	0	0	0.0055	0.046	0	0	0	0	0	0	0	0.069	0.088	0	0	0	0	0	0.0735	0	0.154	0
gi|113679791|ref|NM_001044806.1| Danio rerio protein kinase C, eta, b (prkchb), mRNA	0	0	0	0.0875	0	0	0.056	0	0	0	0.101	2.345	8.235	4.142	18.057	8.592	0	0	0	0	0	0.517
gi|113679793|ref|NM_001044939.1| Danio rerio steroid 5 alpha-reductase 3 (srd5a3), mRNA	0.334	2.438	1.07925	0.875	6.4905	9.18825	1.114	5.909	4.926	0.415	4.669	0.261	1.345	0.777	4.864	2.926	1.634	6.131	2.8345	0	1.565	1.23567
gi|113679805|ref|NM_001044864.1| Danio rerio LEM domain containing 3 (lemd3), mRNA	5.58	2.191	2.641	1.368	4.2035	1.7005	2.75	3.288	1.333	3.028	3.954	0.272	1.287	2.252	0.121	1.909	2.148	6.523	4.758	0.601	5.084	2.40367
gi|113679868|ref|NM_001044800.1| Danio rerio transmembrane protein 200A (tmem200a), mRNA	0	0	0.061	0	0	0	0	0	0	0	0	0	0	0	0	0	0	0	0	0	0	0
gi|113679876|ref|NM_001044798.1| Danio rerio potassium voltage-gated channel, subfamily H (eag-related), member 5a (kcnh5a), mRNA	0	0	0	0	0	0	0.075	0	0	0.14	0	0	0	0	0	0	0	0	0	0	0	0
gi|113679908|ref|NM_001045435.1| Danio rerio zgc:153612 (zgc:153612), mRNA	0.642	0	0.15725	0	0	0.0435	0.143	0.252	0	0	0	0	0	0.166	0	0	0	0	0	0	0.575	0.0836667
gi|113679916|ref|NM_001045434.1| Danio rerio zgc:153278 (zgc:153278), mRNA	0	0	0	0	0.124	0	0	0	0.288	0	0	0	1.594	0	0	0.289	0	0	0.072	0	0	0.184667
gi|113679933|ref|NM_001044793.1| Danio rerio sorting nexin 14 (snx14), mRNA	3.35	5.601	3.97875	4.7565	7.866	11.3102	7.85	8.391	3.944	7.337	5.978	7.268	5.794	8.479	3.265	12.72	9.046	7.23	5.214	7.421	3.89	2.09467
gi|113679943|ref|NM_001045341.1| Danio rerio crystallin, lambda 1 (cryl1), mRNA	1.312	4.306	0.605	1.439	2.205	3.0145	4.721	4.02	1.576	2.603	1.753	8.595	2.112	3.151	0	2.297	2.994	1.415	1.706	0.7265	1.373	1.30833
gi|113679971|ref|NM_001045342.1| Danio rerio elastin microfibril interfacer 1b (emilin1b), mRNA	0	0	0.05175	0.107	0.096	0.06425	0.205	0	0	0	0.497	0	0	0.317	0	0	0.222	0.883	0.306	0.0335	0.546	1.115
gi|113679989|ref|NM_001045339.1| Danio rerio Ras association (RalGDS/AF-6) domain family 6 (rassf6), mRNA	0.24	1.315	0	0	0	0	0.721	0.567	0.131	0.745	0.438	0.563	0.484	0.745	0.75	0	1.045	1.038	0.3735	0.1345	0.259	0.607333
gi|113680039|ref|NM_001045033.1| Danio rerio protein-O-mannosyltransferase 2 (pomt2), mRNA	0.409	0.414	0.21825	0.6385	1.16	0.62575	0.953	1.766	0.669	0.845	1.737	0.106	0.411	0.264	0.142	0.596	0	0.294	0.243	0.417	1.0925	1.36933
gi|113680042|ref|NM_001045048.1| Danio rerio major facilitator superfamily domain containing 8 (mfsd8), mRNA	0.939	5.923	5.74675	4.873	5.4295	1.89825	8.762	17.847	6.921	6.988	38.927	2.197	20.078	8.414	4.149	11.691	4.656	6.903	4.4515	0.6735	18.817	3.36367
gi|113680088|ref|NM_001045231.1| Danio rerio HD domain containing 2 (hddc2), mRNA	4	3.405	0.52425	0.419	6.2455	1.73675	2.933	4.715	1.31	2.977	2.43	2.496	4.025	3.255	6.654	5.692	5.869	0	4.9845	1.0675	1.336	6.742
gi|113680166|ref|NM_001044781.1| Danio rerio si:dkey-263b2.1 (si:dkey-263b2.1), mRNA	0	0	0	0	0	0	0	0	0	0	0	0	0	0	0	0	0	0	0	0	0.1775	0
gi|113680217|ref|NM_001045228.1| Danio rerio high-mobility group 20B (hmg20b), transcript variant 2, mRNA	0	0.123	0.322	0	0.1945	0.37025	0.542	0.239	0.222	0.126	0.494	0.634	0	0.315	0.633	0.667	0.331	0.438	0	0	0.054	2.256
gi|113680230|ref|NM_001045227.1| Danio rerio iroquois homeobox protein 5a (irx5a), mRNA	1.235	0.322	0	0.0925	0	0.0615	0.059	0	0.289	0	0	0	0	0	0	0	0	0.857	0.836	0.128	0	0.655667
gi|113680266|ref|NM_001045229.1| Danio rerio SVOP-like (svopl), transcript variant 2, mRNA	3.082	0.197	0	0	0	0	0.054	0	0	0	0	0	0	0	0	0	0.264	1.05	0	0	0	1.95
gi|113680308|ref|NM_001045223.1| Danio rerio si:ch211-132b12.2 (si:ch211-132b12.2), mRNA	0.58	0	0.116	0	0	0	0	0	0	0	0	0	0	0	0	0	0	0	0	0	0	0.123667
gi|113680390|ref|NM_001045459.1| Danio rerio zgc:153120 (zgc:153120), mRNA	0.314	0	0	0	0	0	0	0	0	0	0	0	0.632	0	0	0	0	0.847	0.0855	0	0.2105	0.379667
gi|113680398|ref|NM_001044934.1| Danio rerio si:dkey-119m7.4 (si:dkey-119m7.4), mRNA	0.222	0	0.014	0	0	0	0	0	0.121	0	0	0	0	0	0	0	0	0	0	0	0	0.00966667
gi|113680404|ref|NM_001045221.1| Danio rerio si:dkeyp-92c9.3 (si:dkeyp-92c9.3), mRNA	0	0	0	0	0	0	0	0	0	0.351	0	0	0	0	0	0	0	0	0	0	0.106	0.467
gi|113680406|ref|NM_001045220.1| Danio rerio si:dkeyp-92c9.2 (si:dkeyp-92c9.2), mRNA	0	0.216	0.382	0.6475	0.227	0.12375	0.118	0	0.194	0	0.648	0	0	0.138	0	0	0	0	0	0	1.571	0
gi|113680453|ref|NM_001045197.1| Danio rerio si:ch211-146f4.3 (si:ch211-146f4.3), mRNA	0	0	0	0	0	0.1325	0	0	0	0.202	0	0	0	0	0	0	0	0	0	0	0	0
gi|113680479|ref|NM_001045216.1| Danio rerio proline-serine-threonine phosphatase interacting protein 1a (pstpip1a), mRNA	0	0	0	0	0	0	0	0	0	0.167	0	0	0	0	0	0.294	0	0.29	0	0	0	0.379667
gi|113680602|ref|NM_001045164.1| Danio rerio si:dkey-177p2.3 (si:dkey-177p2.3), mRNA	1.143	2.143	2.22525	2.3595	1.582	1.24025	1.778	0.898	0.676	2.009	1.158	2.676	0.863	0.849	1.585	0.521	0.362	0.463	0.7545	1.1935	0.869	4.00267
gi|113680606|ref|NM_001044941.1| Danio rerio Kruppel-like factor 11a (klf11a), mRNA	9.987	17.597	4.33725	11.455	12.4065	3.349	17.26	16.36	12.476	20.996	31.873	11.091	10.219	14.626	8.622	14.636	12.417	15.069	17.2345	8.0155	8.793	3.748
gi|113680622|ref|NM_001045458.1| Danio rerio zgc:153137 (zgc:153137), mRNA	0	0	0	0	0	0	0	0	0	0	0	0	0	0	0	0	0	0	0	0	0	0
gi|113680630|ref|NM_001045215.1| Danio rerio forkhead box G1c (foxg1c), mRNA	0	0	0	0	0	0	0	0	0.162	0	0	0	0	0	0	0	0	0	0	0	0	0
gi|113680638|ref|NM_001045218.1| Danio rerio similar to histocompatibility 28 (LOC571364), mRNA	0	0	0	0	0	0	0	0	0	0	0	0	0	0	0	0	0	0	0	0	0	0.404667
gi|113680697|ref|NM_001045213.1| Danio rerio zinc finger protein 592 (znf592), mRNA	0.298	0.241	0.17775	0.2845	0.3125	0.04875	0.529	0.935	0	0.492	1.024	1.238	0.499	0.154	0.103	0.434	1.24	0.161	0.726	0.2255	0.2665	1.00967
gi|113680736|ref|NM_001045214.1| Danio rerio thrombospondin 3b (thbs3b), mRNA	3.404	0	0.54225	0	0.171	0.03825	3.039	0	0.199	5.203	1.846	1.043	0.245	0.141	0.126	0.133	5.88	10.233	13.894	2.1315	2.6025	0.0483333
gi|113680762|ref|NM_001045212.1| Danio rerio si:ch211-262h13.5 (si:ch211-262h13.5), mRNA	0	0	0	0	0	0	0	0.232	0	0.122	0.12	0	0	0	0	0	0	0	0	0	0	4.949
gi|113680845|ref|NM_001045208.1| Danio rerio leucine zipper-EF-hand containing transmembrane protein 1 (letm1), nuclear gene encoding mitochondrial protein, transcript variant 1, mRNA	6.869	4.176	6.434	9.678	27.6345	19.8415	4.68	11.72	12.537	3.815	8.032	4.478	10.006	3.257	3.623	7.854	11.921	4.535	13.589	5.949	12.9745	1.893
gi|113680875|ref|NM_001045204.1| Danio rerio inhibin, alpha (inha), mRNA	0	0	0	0	0	0	0	0	0	0	0	0	0	0	0	0	0	0	0	0	0	0
gi|113680933|ref|NM_001045145.1| Danio rerio si:ch211-194d6.2 (si:ch211-194d6.2), mRNA	0.616	2.34	0.7175	0.645	3.424	0.5065	1.591	1.996	1.345	2.101	2.806	0	3.099	1.79	0.16	1.517	0.167	0.415	2.352	0.137	2.003	7.385
gi|113680953|ref|NM_001045203.1| Danio rerio si:dkeyp-84f11.5 (si:dkeyp-84f11.5), mRNA	1.668	0.225	0.12025	0.314	0.734	0.19725	1.112	0.218	0.202	2.299	2.646	1.807	1.585	5.171	6.166	10.347	1.158	3.9	0.653	0.565	2.7885	4.18833
gi|113680967|ref|NM_001045210.1| Danio rerio xeroderma pigmentosum, complementation group C (xpc), mRNA	1.994	1.818	1.037	0.6075	0.6655	0.53	3.802	2.22	0.605	1.443	0.606	1.123	0.111	0.215	0	0.606	1.866	2.63	1.8985	0	1.1145	4.18567
gi|113681037|ref|NM_001044938.1| Danio rerio pyrroline-5-carboxylate reductase-like (pycrl), mRNA	0	10.2	0.67075	2.4575	1.1685	0.83875	13.045	13.638	8.318	4.425	5.857	6.92	0	24.958	36.887	28.284	5.449	9.364	1.7295	0.254	2.0445	1.34467
gi|113681039|ref|NM_001045196.1| Danio rerio si:ch211-151i8.2 (si:ch211-151i8.2), mRNA	0.534	0	0.097	0	0	0.19025	0.178	0	0	0	0.216	0	0	0.069	0	0.975	0	0.384	0.47	0.0295	0	0.210667
gi|113681094|ref|NM_001045115.1| Danio rerio zinc finger protein 395b (znf395b), mRNA	0.589	1.881	1.0115	0.3455	2.5165	0.62375	5.058	2.258	0.644	10.693	10.92	0	2.669	3.255	4.596	10.645	3.203	9.302	11.0595	1.2625	13.047	4.71
gi|113681111|ref|NM_001045073.1| Danio rerio heat shock protein 90-alpha 2 (hsp90a.2), mRNA	737.078	921.902	2311.35	4113.15	243.825	301.017	1456.39	853.322	4623.76	194.425	236.013	854.432	796.669	372.315	401.155	99.091	461.388	716.225	69.6465	218.833	382.202	3.19833
gi|113681159|ref|NM_001045195.1| Danio rerio si:dkey-263h23.2 (si:dkey-263h23.2), mRNA	2.868	0.996	1.34875	0.2145	0.392	2.08775	0.137	0.483	1.118	0.762	0.249	4.793	2.886	0.317	0	0	0.223	0	1.3675	1.3365	1.76	1.25367
gi|113681278|ref|NM_001045184.1| Danio rerio endosulfine alpha a (ensaa), mRNA	0	0.55	0	0	0	0.1305	0	1.066	0	0.561	0	0	0	0.351	0	0	0	0	0	0	0	0.740333
gi|113681285|ref|NM_001030123.1| Danio rerio translocated promoter region b (to activated MET oncogene) (tprb), mRNA	14.144	6.726	2.56475	2.5455	8.4675	6.69325	6.424	6.272	3.058	6.745	3.714	6.153	4.744	4.504	2.038	4.905	3.653	2.796	15.986	9.5985	5.1985	6.918
gi|113681324|ref|NM_001045185.1| Danio rerio si:ch211-202b2.2 (si:ch211-202b2.2), mRNA	0.579	0.469	0.0335	0	0.0615	0	0.321	0	0	0.12	0.351	0	0.194	0	0	0	0.105	0	0	0	0.051	0.155667
gi|113681327|ref|NM_001040039.1| Danio rerio immune-related, lectin-like receptor 3 (illr3), transcript variant 1, mRNA	0	0	0	0	0	0	0	0	0	0	0	0	0	0	0	0	0	0	0	0	0	0
gi|113681341|ref|NM_001044745.1| Danio rerio aldehyde dehydrogenase 1 family, member A3 (aldh1a3), mRNA	0.896	0.109	0.32575	0	0	0	0.119	0	0	0.222	0.327	0	0	0	0	0	0.097	0	2.9195	0.248	1.277	0.673667
gi|113681363|ref|NM_001045104.1| Danio rerio solute carrier family 38, member 2 (slc38a2), mRNA	21.229	14.73	12.8358	7.5405	12.546	13.564	25.711	14.322	9.791	20.929	26.055	3.14	18.193	10.58	11.262	15.784	13.524	23.815	48.1695	6.1105	19.5425	5.52333
gi|113681365|ref|NM_001045179.1| Danio rerio tectonin beta-propeller repeat containing 2 (tecpr2), mRNA	1.229	0.249	0.0505	0.1715	0.804	0.569	0.737	1.255	0.716	0.457	0.946	0.192	0.824	0.571	0.511	0.179	0.579	1.768	1.199	0.6155	1.418	0.317
gi|113681375|ref|NM_001045182.1| Danio rerio serine incorporator 2 (serinc2), mRNA	6.221	12.817	17.8712	30.069	44.5405	20.0308	12.957	28.719	19.435	12.539	21.937	4.853	25.387	14.53	8.802	13.996	19.531	7.366	10.705	0.154	18.5535	7.24433
gi|113681378|ref|NM_001045178.1| Danio rerio si:ch211-244h7.5 (si:ch211-244h7.5), mRNA	10.759	0.128	2.5035	0.221	1.7815	0.13225	0.281	0	4.607	0.131	0.256	0.165	2.335	0	0	0.231	0.115	0.683	1.216	0.4725	5.2265	0.258667
gi|113681394|ref|NM_001045177.1| Danio rerio protein tyrosine phosphatase, receptor type, E, b (ptpreb), mRNA	0	0.317	0	0	0	0	0	0	0	0.129	0	0	0	0	0	0	0.113	0.337	0	1.924	0	0.214667
gi|113681400|ref|NM_001045175.1| Danio rerio si:ch211-244h7.8 (si:ch211-244h7.8), mRNA	2.46	0.115	0.07475	0.099	0	0.0865	0	0	0.413	0	0	0	0.19	0.147	0	0	0	0	0.415	0.0625	0.077	0.00433333
gi|113681412|ref|NM_001044746.1| Danio rerio cyclic nucleotide gated channel alpha 5 (cnga5), mRNA	0	0	0	0	0	0	0	0	0	0	0	0	0	0	0	0	0	0	0	0	0	0.0143333
gi|113681439|ref|NM_001045176.1| Danio rerio si:ch211-244h7.4 (si:ch211-244h7.4), mRNA	0.507	0.154	0	0	0	0	0.085	0	0	0	0	0	0	0	0	0	0	0	0	0	0	0.137667
gi|113681479|ref|NM_001045168.1| Danio rerio si:ch211-154o6.7 (si:ch211-154o6.7), mRNA	0	0	0	0	0	0	0.052	0	0	0.097	0	0	0	0	0	0	0	0	0.131	0	0	1.00033
gi|113681498|ref|NM_001045165.1| Danio rerio si:dkey-110c1.7 (si:dkey-110c1.7), mRNA	0.389	0.118	0.00825	0.034	0	0	0.022	0	0.035	0.201	0	0	0.065	0	0	0	0.353	0	0.2505	0	0	0.253
gi|113681526|ref|NM_001045163.1| Danio rerio si:ch211-154o6.2 (si:ch211-154o6.2), mRNA	0	0.472	0.0405	0.6475	0.099	0.207	0.466	0.549	0.085	0	0.094	0.121	0	0.361	0	0.17	0	0.252	0.7325	0.077	0.5825	0.212667
gi|113681529|ref|NM_001045158.1| Danio rerio SET binding factor 1 (sbf1), mRNA	2.485	2.014	1.3295	0.9845	1.618	1.38975	1.671	1.627	1.005	1.941	1.397	2.477	2.408	1.926	1.244	1.309	0.425	0.497	1.966	2.5855	1.665	1.67633
gi|113681542|ref|NM_001045160.1| Danio rerio zinc finger and BTB domain containing 37 (zbtb37), mRNA	1.3	0.395	0.5405	1.302	1.5	0.9735	1.011	1.787	1.537	0.94	1.053	0.169	0	1.091	0	0.711	0.118	0	0.0295	0	0.2335	0
gi|113681558|ref|NM_001045156.1| Danio rerio si:rp71-81o21.2 (si:rp71-81o21.2), mRNA	0	0	0	0	0	0	0	0	0	0	0	0	0	0	0	0	0	0	0	0	0	0
gi|113681561|ref|NM_001045150.1| Danio rerio si:dkey-195c14.1 (si:dkey-195c14.1), mRNA	0	0.661	0.0115	0	0.0425	0.10675	0.151	0	0.049	0.056	0.11	0	0.091	0	0	0	0	0	0.1655	0	0.109	0
gi|113681576|ref|NM_001045154.1| Danio rerio ATPase, class II, type 9B (atp9b), mRNA	0.501	0.852	0.63725	0.522	0.5375	0.782	0.567	0.708	0.219	0.311	0.852	0	0.101	0.194	0.208	0.11	0.544	2.486	0.933	0	0.4855	0.882
gi|113681578|ref|NM_001045149.1| Danio rerio si:dkey-22l11.2 (si:dkey-22l11.2), mRNA	0.452	0.687	0.6065	0.589	1.448	0.36625	1.657	2.131	0.37	2.243	1.373	1.498	1.023	2.89	0.822	2.226	0.123	0	1.866	0	2.011	3.37867
gi|113681607|ref|NM_001045148.1| Danio rerio SNAP-associated protein (snapin), mRNA	0	0.371	0	0	0.41	0.132	0.102	0.72	0	0.189	0.464	0	1.229	1.006	1.111	1.337	0.581	0.577	0.1515	0.186	0.2455	2.38067
gi|113681626|ref|NM_001045142.1| Danio rerio v-myc myelocytomatosis viral oncogene homolog 1, lung carcinoma derived (avian) b (mycl1b), mRNA	2.548	2.761	1.45075	0.8395	1.54	1.15175	2.584	0.914	0.423	1.855	1.144	0.259	0.446	0.601	1.382	1.455	1.204	4.184	2.4165	0.0805	1.112	18.5173
gi|113681628|ref|NM_001045140.1| Danio rerio si:ch211-151h10.2 (si:ch211-151h10.2), mRNA	0.667	0.811	0.07025	0	0	0.16025	0.296	0	0	0.138	0	0	0	0.345	0.231	0.487	0.242	0	0.341	0	0	0.0493333
gi|113681649|ref|NM_001045139.1| Danio rerio carbonic anhydrase like (LOC568143), mRNA	0	0	0	0	0.315	0	0	0.395	0	0.208	0	0	0	0	0	0	0	0	0	0.0555	0	0
gi|113681652|ref|NM_001045138.1| Danio rerio programmed cell death 2 (pdcd2), mRNA	2.646	2.486	2.19975	1.38	7.4805	2.7725	4.57	4.253	2.233	3.432	4.968	2.44	1.695	1.771	0	5.793	0.392	0.13	0.7285	2.061	5.2015	1.904
gi|113681667|ref|NM_001045135.1| Danio rerio similar to transmembrane 4 superfamily member 9 (LOC567512), mRNA	0.467	0.568	0.225	0	2.367	0.25725	1.401	2.203	1.02	3.767	12.487	0	0	0.905	1.457	1.023	0	0.756	0.4535	0.4925	10.439	0
gi|113681669|ref|NM_001045133.1| Danio rerio SKI family transcriptional corepressor 1b (skor1b), mRNA	0.902	0.091	0	0	0	0	0.1	0	0	0	0	0	0	0	0	0	0.082	0	0	0	0	0
gi|113681715|ref|NM_001045129.1| Danio rerio IQ motif containing H (iqch), mRNA	0	0	0	0	0	0	0	0	0	0	0	0	0	0	0	0	0	0	0	0	0	0
gi|113681717|ref|NM_001045124.1| Danio rerio similar to MOX-2 protein (LOC566969), mRNA	0	0	0	0	0	0	0.13	0	0	0	0	0	0	0	0	0	0	0	0	0	0	0
gi|113681758|ref|NM_001045128.1| Danio rerio acyl-CoA synthetase long-chain family member 3a (acsl3a), mRNA	0.475	4.718	8.42575	5.4065	3.896	7.173	6.702	5.973	4.842	10.607	13.082	0	0.797	0	0	0.173	6.626	5.127	5.416	0.1565	13.4035	0.0646667
gi|113681777|ref|NM_001045118.1| Danio rerio scinderin (scin), mRNA	0	0	0	0	0	0	0	0	0	0.094	0	0	0	0	0	0	0	0	0	0	0	1.741
gi|113681780|ref|NM_001045114.1| Danio rerio si:ch211-30b16.2 (si:ch211-30b16.2), mRNA	0.255	0	0.14525	0	0	0	0	0	0	0.158	0	0	0	0	0	0	0	0	0.213	0	0	0.850667
gi|113681791|ref|NM_001045113.1| Danio rerio si:dkey-231l1.3 (si:dkey-231l1.3), mRNA	0.215	0	0.06425	0	0.1005	0.74425	0	0.506	0	0	0	0	2.591	0.249	0.446	0.235	0	0	0	0	0.2845	0
gi|113681808|ref|NM_001045105.1| Danio rerio TGF-beta activated kinase 1/MAP3K7 binding protein 3 (tab3), mRNA	4.855	5.437	3.1695	1.966	5.8425	4.86875	6.684	6.777	5.022	4.517	4.656	1.096	5.142	5.693	9.961	8.53	3.263	7.238	4.337	2.3075	4.7135	8.47867
gi|113681811|ref|NM_001045108.1| Danio rerio family with sequence similarity 65, member A (fam65a), mRNA	2.048	0.946	1.12375	0.899	2.5215	2.29075	1.911	1.738	0.492	2.033	2.09	4.666	6.183	4.858	2.981	4.753	1.291	4.863	5.674	0.081	2.1465	1.27433
gi|113681826|ref|NM_001045100.1| Danio rerio si:dkeyp-39e9.2 (si:dkeyp-39e9.2), mRNA	0	0.931	0.1	0.7965	2.352	1.5835	0.51	1.128	0.209	1.305	1.395	2.985	2.118	1.409	0.796	1.047	0.832	4.439	0.3675	0.2775	0.487	2.61167
gi|113681843|ref|NM_001045098.1| Danio rerio si:ch211-203h15.1 (si:ch211-203h15.1), mRNA	0.279	0.085	0.1045	0	0.0655	0.08875	0.232	0.658	0	0.692	0.593	0	0	0	0.145	0	0	0.452	0.0975	0.115	0.318	3.26467
gi|113681845|ref|NM_001045097.1| Danio rerio si:ch211-39a7.1 (si:ch211-39a7.1), mRNA	0	0	0	0	0	0	0	0	0	0	0	0.485	0	0.181	0	0	0	0	0	0	0	0.0996667
gi|113681860|ref|NM_001045095.1| Danio rerio tubby like protein 4 (tulp4), mRNA	2.319	1.047	0.6065	1.5915	1.327	1.96725	1.148	1.406	0.796	1.356	1.489	0.362	2	0.565	1.722	1.523	2.593	0.107	1.713	2.0615	1.005	0.435
gi|113681872|ref|NM_001044989.1| Danio rerio si:ch211-207c7.1 (si:ch211-207c7.1), mRNA	0	0	0	0	0	0	0	0	0	0	0	0	0	0	0	0.342	0	0	0	0	0	0
gi|113681882|ref|NM_001044988.1| Danio rerio si:dkey-72l14.4 (si:dkey-72l14.4), mRNA	0.467	3.182	2.825	1.3895	4.0465	0.73875	3.084	2.975	1.48	2.319	3.066	0.656	1.223	0.869	0	1.33	0.762	0.303	2.3815	0	0.788	9.617
gi|113681902|ref|NM_001044992.1| Danio rerio si:dkey-72l14.7 (si:dkey-72l14.7), mRNA	6.643	4.595	9.57475	17.163	25.143	20.2297	8.625	11.069	11.63	9.66	3.895	30.015	79.974	51.564	17.62	22.061	2.24	0.124	0	2.657	0	0
gi|113681904|ref|NM_001044993.1| Danio rerio NFS1 nitrogen fixation 1 (S. cerevisiae) (nfs1), nuclear gene encoding mitochondrial protein, mRNA	0	0.476	0.4415	0.082	0.541	0.82725	1.044	1.477	1.967	1.263	0.571	0.733	0.158	0.303	0.977	0.343	0.425	0.338	0.7595	0	0.2325	20.5937
gi|113681914|ref|NM_001045000.1| Danio rerio si:ch211-105d11.3 (si:ch211-105d11.3), mRNA	8.349	5.697	2.9665	7.3795	8.1045	6.6335	8.459	7.832	7.534	4.015	4.967	2.791	2.743	1.915	1.771	3.543	1.574	3.493	5.7965	1.5945	4.5625	7.428
gi|113681917|ref|NM_001044999.1| Danio rerio pleckstrin homology domain containing, family G (with RhoGef domain) member 7 (plekhg7), mRNA	6.213	3.777	4.05325	5.9735	2.784	1.901	9.358	2.636	5.698	7.244	8.604	0	5.001	0.578	1.808	3.808	3.646	12.872	9.554	2.301	10.116	0.846667
gi|113681934|ref|NM_001045001.1| Danio rerio solute carrier family 12 (sodium/potassium/chloride transporters), member 10.2 (slc12a10.2), mRNA	1.432	0	0	0	0	0	0.034	0	0	0	0	0	0	0	0.213	0	0	0.221	0	0	0	0.991
gi|113681946|ref|NM_001045005.1| Danio rerio heparanase (hpse), mRNA	3.348	0.678	0.69025	0.292	1.584	1.55825	1.921	1.315	0.102	3.114	1.694	8.559	1.497	7.855	0	11.196	0.606	0.602	5.5115	2.28	3.396	1.69633
gi|113681948|ref|NM_001045002.1| Danio rerio BTB (POZ) domain containing 11a (btbd11a), mRNA	0	0.387	0	0	0	0	0	0	0	0.296	0.193	0	0.32	0.062	0.992	0	0	0	0	0	0.343	0.0446667
gi|113681970|ref|NM_001045007.1| Danio rerio si:ch211-219a15.3 (si:ch211-219a15.3), mRNA	0	0	0.03925	0	0	0	0	0	0	0	0	0.967	0	0	0	0	0	0	0	0	0.2905	0
gi|113681988|ref|NM_001045006.1| Danio rerio si:dkey-9a20.6 (si:dkey-9a20.6), mRNA	0.272	0.165	0.2115	0	0	0.04275	0.317	0	0	0.084	0	1.485	0	0.105	0.141	0.149	0.074	0	0.2665	0.2735	0	2.48633
gi|113682005|ref|NM_001045011.1| Danio rerio RGM domain family, member A (rgma), mRNA	1.321	0.85	0.56925	0.6295	0.895	0.80125	0.57	1.007	0.339	0.434	0.849	0	0.547	0.09	0.485	0.17	2.66	0.88	2.7005	1.1035	1.2005	0.96
gi|113682007|ref|NM_001045014.1| Danio rerio si:ch211-106n13.3 (si:ch211-106n13.3), mRNA	0.082	0.05	0.087	0.129	0.5535	0.12875	0.082	0	0.987	0.051	0.2	0	2.149	0.064	0	0.09	0.045	0.133	0.6125	0	1.0025	0.544
gi|113682018|ref|NM_001045022.1| Danio rerio similar to transmembrane 4 superfamily member 1 (LOC563601), mRNA	0	3.229	5.27525	1.556	6.4025	3.203	11.282	11.736	3.262	20.997	16.935	0	1.336	0.257	0	2.18	14.068	16.117	4.161	10.9595	18.799	0.220333
gi|113682062|ref|NM_001045027.1| Danio rerio chemokine (C-C motif) receptor 12.3 (ccr12.3), mRNA	0	0	0	0	0	0	0	0	0	0	0	0.951	0	0	0	0	0	0	0	0	0	0.131333
gi|113682069|ref|NM_001045029.1| Danio rerio similar to KIAA1343 protein (LOC563808), mRNA	0.376	0	0.02825	0.441	0.088	0.177	0.125	0	0.103	0.117	0.457	0	0	0.073	0	0	0	0	0.971	0	0.2295	0.956667
gi|113682092|ref|NM_001045026.1| Danio rerio family with sequence similarity 65, member B (fam65b), mRNA	1.226	2.61	0.7635	0.693	4.4955	1.099	2.146	7.348	0.837	2.409	2.421	1.834	1.645	3.762	1.487	1.119	3.443	1.765	4.1795	0.0675	3.8265	0.845
gi|113682094|ref|NM_001045031.1| Danio rerio si:ch211-154o6.3 (si:ch211-154o6.3), mRNA	1.18	4.202	2.153	0.353	3.5685	2.2235	3.933	2.782	1.289	4.392	2.355	3.288	2.545	1.503	5.433	2.214	1.099	0.546	5.3235	2.1335	1.8205	1.25133
gi|113682108|ref|NM_001045034.1| Danio rerio K(lysine) acetyltransferase 2B (kat2b), mRNA	0.284	0.173	0.1735	0	0	0	0.52	0.167	0.077	0.176	0.259	0	0.143	0.33	0	0.311	0	0.153	0.3165	0.047	0.1705	0.356333
gi|113682133|ref|NM_001045035.1| Danio rerio si:dkey-1b17.2 (si:dkey-1b17.2), mRNA	0	2.989	0.2845	0	0	0.11125	0.91	3.863	0	0.678	1.659	0	0	0.847	2.839	3.587	0.297	1.768	0	0	0	0
gi|113682166|ref|NM_001045045.1| Danio rerio olfactory receptor C family, s1 (olfcs1), mRNA	0	0	0	0	0	0	0	0	0	0	0	0	0	0	0	0	0	0	0	0	0	0
gi|113682168|ref|NM_001045047.1| Danio rerio si:dkey-91f15.6 (si:dkey-91f15.6), mRNA	0	0	0.18025	0	0	0	0	0	0	0	0	0	0	0	0	0	0	0	0	0.038	0	2.06067
gi|113682185|ref|NM_001045049.1| Danio rerio si:ch211-69g19.2 (si:ch211-69g19.2), mRNA	4.362	3.736	0.515	0	0.8815	1.271	4.162	3.038	0.974	1.353	0.241	1.856	0.399	1.152	1.237	0.651	8.187	0.963	3.979	1.712	0.375	25.872
gi|113682188|ref|NM_001045044.1| Danio rerio glutaminase a (glsa), nuclear gene encoding mitochondrial protein, mRNA	0	0	0.04625	0	0.1435	0.10975	0	0	0.1	0.113	0.111	0	0	0	0	0	0	0.492	0.177	0	0	0.698333
gi|113682209|ref|NM_001045050.1| Danio rerio RAN binding protein 10 (ranbp10), mRNA	1.104	1.727	1.719	1.1955	1.963	0.9635	2.524	1.86	0.948	1.566	1.821	1.969	3.175	1.773	1.968	1.9	0.343	1.192	0.282	1.9185	2.1645	1.70833
gi|113682221|ref|NM_001045052.1| Danio rerio transmembrane protein 106Bb (tmem106bb), mRNA	1.141	0.347	1.04725	2.4545	2.029	1.541	0.57	1.681	0.467	2.3	1.906	0.445	0.287	0.663	0.593	0.937	0.31	0	0.482	0.583	0.459	0.191667
gi|113682237|ref|NM_001045055.1| Danio rerio si:ch211-132b12.7 (si:ch211-132b12.7), mRNA	0	0.171	0.02675	0	0.156	0.1255	0.611	1.661	0.077	4.108	2.568	0.11	0.142	0.382	2.344	2.16	0.383	2.205	1.9255	1.834	2.9745	3.82367
gi|113682239|ref|NM_001045058.1| Danio rerio si:ch211-132b12.6 (si:ch211-132b12.6), mRNA	0	0	0	0	0	0	0	0	0	0	0	0	0	0	0	0	0	0	0	0	0	0
gi|113682258|ref|NM_001045068.1| Danio rerio cyclin D2, b (ccnd2b), mRNA	0	0	0	0	0	0.38525	0	0	0.209	0	0	0	0	0	0	0	0	0	0.4815	2.455	0.101	0
gi|113682271|ref|NM_001045069.1| Danio rerio si:ch211-216l23.2 (si:ch211-216l23.2), mRNA	5.592	5.975	5.019	4.018	7.039	9.13975	6.663	7.589	4.903	9.142	7.101	9.912	6.649	3.808	2.642	5.007	2.118	3.931	18.1815	12.971	5.5475	6.02367
gi|113682306|ref|NM_001045074.1| Danio rerio cartilage paired-class homeoprotein 1 (cart1), mRNA	0.352	0	0.41475	0	0.3305	0	0.117	0.415	0	0.437	0	4.671	12.051	10.919	12.084	9.639	0.766	0	0.294	0	0.33	0
gi|113682308|ref|NM_001045080.1| Danio rerio solute carrier family 12 (sodium/chloride transporters), member 3 (slc12a3), mRNA	0.089	0	0.01125	0	0	0	0	0	0	0	0	0	0	0	0	0	0	0	0	0	0	0.252667
gi|113682327|ref|NM_001045084.1| Danio rerio sema domain, immunoglobulin domain (Ig), short basic domain, secreted, (semaphorin) 3E (sema3e), mRNA	0.334	0	0.04825	0.2615	0.7905	0.23225	1.077	0.525	0.304	1.106	4.061	0	1.458	0.173	0	1.586	3.573	0.962	1.622	1.6235	1.251	0.425667
gi|113682342|ref|NM_001044743.1| Danio rerio zgc:194119 (zgc:194119), mRNA	0	0	0	0	0	0	0.242	0	0	0	0	0	0	0.188	0	0	0.132	0.784	0.033	0	0	0
gi|113682362|ref|NM_001044998.1| Danio rerio prolyl 4-hydroxylase, alpha polypeptide I a (p4ha1a), mRNA	0	0	0.01375	0	0	0.088	0.144	0.255	0.118	0.134	0	0	0	0	0	0	0	0.117	0	0	0	0.150667
gi|113682365|ref|NM_001045085.1| Danio rerio enhancer of mRNA decapping 4 (edc4), mRNA	0.625	1.521	0.62325	0.8165	0.841	0.22475	2.248	4.317	0.78	1.357	1.818	0.209	0.899	1.367	1.997	1.076	0.364	0.868	1.337	3.0115	0.7025	0.762667
gi|113682386|ref|NM_001045086.1| Danio rerio NGFI-A binding protein 1a (EGR1 binding protein 1) (nab1a), mRNA	16.552	1.437	0.38325	0.2475	0.4735	0.632	1.628	0.372	0.258	1.173	0.67	2.828	0	0.428	0	0	0.257	2.126	3.8945	0.026	2.477	0.054
gi|113682405|ref|NM_001045429.1| Danio rerio zgc:153681 (zgc:153681), mRNA	0	0	0	0	0	0	0	0	0	0	0	0	0	0	0	0	0	0	0	0	0	1.84967
gi|113682417|ref|NM_001045090.1| Danio rerio si:ch211-199g17.1 (si:ch211-199g17.1), mRNA	2.37	0.288	0.13025	0.4445	1.163	0.05225	0.221	0.894	0.155	1.763	3.569	3.327	21.458	26.589	10.74	23.86	3.451	1.023	0.28	0.481	0.2025	1.22367
gi|113682429|ref|NM_001045427.1| Danio rerio zgc:153763 (zgc:153763), mRNA	0.783	3.331	0.7275	0.6115	1.7675	0.8585	2.435	2.153	0.855	2.266	0.951	1.018	2.1	2.123	1.085	2.285	1.134	3.238	2.0205	0	1.333	0.420333
gi|113682447|ref|NM_001045428.1| Danio rerio zgc:153710 (zgc:153710), mRNA	0	0	0.0595	0	0	0.41425	0.455	0	0	0.636	0.207	0	0	0	0	0	0.186	0	0	0	0.0905	0.634667
gi|113682480|ref|NM_001045066.1| Danio rerio transcription factor binding to IGHM enhancer 3b (tfe3b), mRNA	0.25	0.304	0.05925	0	0	0.036	0	0	0	0	0	0	0	0	0.26	0	0	0	0	0	0.168	0.668333
gi|113682510|ref|NM_001045070.1| Danio rerio myotubularin related protein 9 (mtmr9), mRNA	0.206	0.125	0.151	0.1075	0.521	0.24225	0.069	0	0.112	0.51	0.25	0.16	0	0.08	0.214	0.675	0.112	0	0.5665	0.1355	0.138	1.52233
gi|113682522|ref|NM_001045043.1| Danio rerio malonyl CoA:ACP acyltransferase (mitochondrial) (mcat), nuclear gene encoding mitochondrial protein, mRNA	2.75	5.927	3.395	4.887	17.2105	6.97675	7.33	12.08	6.687	7.287	5.77	3.12	3.521	3.487	2.079	3.83	9.508	4.316	11.653	2.5205	2.1785	1.53567
gi|113865948|ref|NM_001045488.1| Danio rerio zgc:161979 (zgc:161979), mRNA	0	0.362	0.16025	1.0855	0.2795	0	0	0	0	0.37	0	0.465	0	0	0.62	0	25.916	0	0.324	4.0075	0	47.176
gi|113930682|ref|NM_001045562.1| Danio rerio SET domain containing 4 (setd4), mRNA	1.103	0.223	0.232	0.3345	1.4825	0.94275	0.735	0.65	0	1.026	1.451	0.143	0.185	0.214	0	0.201	0.599	3.767	0.5815	0	1.1305	28.949
gi|113930692|ref|NM_001045565.1| Danio rerio zgc:153609 (zgc:153609), mRNA	1.398	1.699	0.722	0.677	1.989	0.9485	1.663	2.824	0.109	0.371	5.942	0.467	3.415	1.315	0.623	3.059	0.868	0	2.298	0	1.443	0.697667
gi|113930694|ref|NM_001045561.1| Danio rerio zgc:152808 (zgc:152808), mRNA	92.316	21.885	64.4878	33.714	103.186	73.9748	24.065	24.208	38.583	29.722	18.377	38.415	31.333	31.919	16.53	22.964	32.401	8.102	90.204	28.4335	81.21	1.219
gi|113930696|ref|NM_001013451.2| Danio rerio mitogen-activated protein kinase 7 (mapk7), mRNA	0.917	1.115	0.1305	0.137	0.9295	1.17125	1.004	0.927	0.286	1.463	0.318	0	0	0.863	1.226	0.86	6.123	2.121	0.971	3.0785	0.5095	1.978
gi|113930768|ref|NM_001045552.1| Danio rerio mitogen-activated protein kinase 6 (mapk6), mRNA	0.774	0.753	0.63	0.6065	0.561	1.32525	1.239	1.095	0.338	1.825	1.788	2.537	0.156	1.02	0.966	0.339	0.084	0.669	0.7335	2.6695	2.245	1.654
gi|113930770|ref|NM_001045549.1| Danio rerio potassium inwardly-rectifying channel, subfamily J, member 13 (kcnj13), mRNA	0	0.757	0	1.631	4.9625	6.96075	0.415	9.179	1.531	0.966	2.27	0.972	0	0	0	0	0	0	0	0	0	0.655667
gi|113931167|ref|NM_001045244.1| Danio rerio signal peptide peptidase-like 2 (sppl2), transcript variant 2, mRNA	1.634	3.079	0.6695	2.6445	3.14	1.2335	3.812	7.126	1.338	4.155	4.665	0	2.631	1.709	1.189	4.113	0.533	3.615	3.136	2.235	1.484	2.401
gi|113931639|ref|NM_001044950.1| Danio rerio si:dkey-159a18.7 (si:dkey-159a18.7), mRNA	0.671	12.443	0.11625	0.1755	1.423	2.871	4.696	30.847	1.649	11.445	36.073	20.414	5.402	18.461	11.859	13.221	11.122	11.405	3.4905	0.6525	0.9905	13.8923
gi|113931641|ref|NM_001045392.1| Danio rerio si:ch211-147d7.2 (si:ch211-147d7.2), mRNA	0.586	5.699	0	0.307	0	0.7105	9.566	3.453	0	3.27	0.356	3.199	0.59	19.523	15.835	0.641	3.502	13.276	0	0	0.621	3.78133
gi|113931645|ref|NM_001045194.2| Danio rerio zgc:153896 (zgc:153896), mRNA	0	0	0.0145	0	0.073	0	0.076	0	0	0	0	0.179	0	0.089	0	0	0.623	0	0.2225	0	0	3.69667
gi|113931647|ref|NM_001045038.2| Danio rerio BCL2-interacting killer (apoptosis-inducing) (bik), mRNA	7.673	0.246	0.035	0.423	0.1895	0	0	0	0.22	0.25	0	0.315	0	0	0	0	0.658	0	0	0	0	1.11
gi|113931650|ref|NM_001044855.2| Danio rerio vascular endothelial growth factor Ab (vegfab), mRNA	0.241	3.225	1.4775	1.7615	2.721	1.287	3.535	2.131	1.777	2.841	3.515	0	0.606	0.28	0	0	3.996	2.406	2.3935	0.306	6.175	1.22167
gi|113931652|ref|NM_182871.3| Danio rerio fibroblast growth factor 24 (fgf24), mRNA	0.739	0	0	0	0.194	0	0.082	0	0	0	0	0	0	0	0	0	0	0	1.1325	0	0	0
gi|113951738|ref|NM_001045846.1| Danio rerio CDC42 effector protein (Rho GTPase binding) 1 (cdc42ep1), mRNA	5.633	2.156	0.837	0.3275	4.999	3.21475	2.016	3.442	2.392	3.623	3.168	0	2.729	9.135	0.217	8.905	18.591	4.727	8.855	0.3575	3.78	5.31067
gi|113951740|ref|NM_001045845.1| Danio rerio zgc:153293 (zgc:153293), mRNA	5.128	4.102	1.12925	2.8805	5.879	1.84675	8.004	7.316	1.768	7.532	3.934	9.472	2.444	8.993	5.05	6.794	8.798	0.437	7.1915	6.705	3.9065	4.48667
gi|113951742|ref|NM_001045844.1| Danio rerio zgc:153333 (zgc:153333), mRNA	0	0.687	0.137	0.3425	0.06	0.4135	0.627	0	0.308	0.7	0.572	4.258	2.084	0.073	3.327	0.824	0.409	0.305	0.8875	0.031	0.376	0.619667
gi|113951744|ref|NM_001045848.1| Danio rerio zgc:153225 (zgc:153225), mRNA	12.916	3.111	2.7995	6.2955	17.129	13.6145	6.334	4.883	10.244	5.743	7.105	3.041	2.452	4.816	2.787	8.535	3.178	7.231	7.7045	3.758	8.2875	16.0917
gi|113951746|ref|NM_001045847.1| Danio rerio nitrogen permease regulator-like 2 (S. cerevisiae) (nprl2), mRNA	0.217	0	0.28475	1.415	0.967	0.69325	0.072	1.025	0.356	0.135	0.528	0.17	0.438	0.253	0	0.714	0.118	0.469	0.4515	0	2.9635	8.71267
gi|113951748|ref|NM_001045849.1| Danio rerio GTP binding protein overexpressed in skeletal muscle (gem), mRNA	0	1.06	0.13775	0.3965	0.3475	0.131	0.799	0.77	0.119	1.081	0.529	0	0	0.422	1.585	0.477	1.776	6.583	0.241	0.036	0.5275	0.09
gi|113951750|ref|NM_001045851.1| Danio rerio aminoacyl tRNA synthetase complex-interacting multifunctional protein 1 (aimp1), mRNA	322.573	173.719	62.8847	35.212	255.366	105.389	131.928	147.737	69.23	150.22	80.038	250.923	104.074	173.895	119.975	121.523	50.328	52.967	185.059	114.392	89.4595	9.71567
gi|113951752|ref|NM_001045850.1| Danio rerio casein kinase 1, gamma 2b (csnk1g2b), mRNA	14.285	10.275	5.46575	3.7325	12.146	9.98625	10.258	13.517	6.701	14.225	6.477	10.515	5.466	11.928	8.157	11.892	6.778	8.793	18.2945	7.2665	5.7685	2.63767
gi|113951756|ref|NM_001045852.1| Danio rerio G-rich RNA sequence binding factor 1 (grsf1), mRNA	8.052	4.579	0.81625	3.0505	2.505	4.033	7.53	5.511	3.403	3.866	2.998	1.418	0	2.214	1.89	3.127	2.682	4.484	2.7925	1.4295	2.406	10.1147
gi|113951758|ref|NM_001045853.1| Danio rerio protein phosphatase 1, regulatory (inhibitor) subunit 14Ba (ppp1r14ba), mRNA	0.886	1.257	0.09575	0.8475	0.837	0.09275	1.28	3.483	0.968	1.649	0	0	0	0.229	0	0.323	0.482	2.551	0.906	0	0	0.842
gi|113951760|ref|NM_001045854.1| Danio rerio peroxisomal biogenesis factor 11 beta (pex11b), mRNA	0.3	0.73	0.90525	0.3145	0.5685	0.40975	0.6	0	0	1.862	1.094	0.937	0	0	0	1.971	0.326	0	0	0.1485	0.9285	3.52133
gi|113951762|ref|NM_001045857.1| Danio rerio olfactomedin-like 3a (olfml3a), mRNA	0	0	0.02875	0.712	0.1065	0.43075	1.888	0	0.99	2.389	0.826	0	0	0	0	0	0.123	0	3.844	0.224	0.5165	0.917667
gi|113951764|ref|NM_001045858.1| Danio rerio fibroblast growth factor 10b (fgf10b), mRNA	0	0	0	0	0	0	0	0	0	0	0	0	0	0	0	0	0	0	0	0	0	0
gi|113951766|ref|NM_001045859.1| Danio rerio zgc:136820 (zgc:136820), mRNA	0	0	0	0	0	0	0.06	0	0.049	0	0	0	0	0.069	0	0	0	0.145	0.012	0	0	5.012
gi|114145581|ref|NM_001045224.1| Danio rerio Bcl2 modifying factor 1 (bmf1), mRNA	0	0.961	0	0	1.1275	0	0.263	0.932	0.432	0	0	0	0	0.919	0	0	0.43	0	0	0	0.8385	1.02267
gi|114145589|ref|NM_001047190.1| Danio rerio retinol dehydrogenase 14b (all-trans/9-cis/11-cis) (rdh14b), mRNA	0.374	0.455	0.34425	0.196	0.2665	0.092	0.685	0.882	0.51	1.74	0.454	0.875	0.376	0.362	1.361	0.205	0.203	0.908	0.523	0.641	0.403	1.40133
gi|114158707|ref|NM_212603.2| Danio rerio acidic (leucine-rich) nuclear phosphoprotein 32 family, member B (anp32b), mRNA	20.376	46.009	2.07825	5.55	9.7475	2.23475	26.264	84.978	6.479	22.913	47.464	13.099	14.419	19.868	89.148	35.781	26.523	49.168	23.167	14.72	11.513	40.467
gi|114158712|ref|NM_212698.2| Danio rerio zgc:77056 (zgc:77056), mRNA	0	1.628	0.01875	0	0	0	1.487	0.351	0	1.845	0.904	0.232	0	2.306	1.547	0	0.485	3.853	0	0	0.2785	4.00833
gi|114158714|ref|NM_001048006.1| Danio rerio LSM7 homolog, U6 small nuclear RNA associated (S. cerevisiae) (lsm7), mRNA	0.789	2.158	1.0995	0	3.4865	3.59575	2.892	1.395	4.092	1.712	5.99	4.615	0.397	3.974	0.82	6.476	1.286	3.831	2.733	1.859	5.326	25.1397
gi|114205384|ref|NM_001030160.2| Danio rerio cholinergic receptor, muscarinic 5b (chrm5b), mRNA	0	0.274	0.09225	0	0.211	0.32475	0.3	0	0	0.279	0	0	0	0.087	0	0.246	0	0	0.0305	0.037	0.2425	0.01
gi|114205449|ref|NM_001048055.1| Danio rerio leukocyte cell-derived chemotaxin 2 like (lect2l), mRNA	3.594	0	0	0.2355	0.565	0	0.898	0	0.491	1.393	6.277	18.925	0	0	0	0	9.033	0.242	3.322	9.1645	0.357	1.82933
gi|114326245|ref|NM_001048063.1| Danio rerio cholinergic receptor, nicotinic, alpha 4 (chrna4), mRNA	0	0	0	0	0	0	0	0	0	0	0	0	0	0	0	0	0	0	0	0	0.0395	0.127667
gi|114326247|ref|NM_001048064.1| Danio rerio elastin b (elnb), mRNA	0	0	0	0	0	0	0	0	0	0	0	0	0	0	0	0	0	0	0	0	0	0.0996667
gi|114326249|ref|NM_001048066.1| Danio rerio caspase 3, apoptosis-related cysteine protease b (casp3b), mRNA	0.395	0	0.05	0.207	0	0	0.263	0	0	0	0.48	0	0	0	0	0	0	0	0	1.1205	0	0.126667
gi|114326255|ref|NM_001048065.1| Danio rerio si:dkey-61p9.11 (si:dkey-61p9.11), mRNA	0.054	0	0	0	0	0	0	0	0	0	0	0	0	0	0	0	0	0	0	0	0	0.803
gi|114326268|ref|NM_001001840.2| Danio rerio nuclear factor of kappa light polypeptide gene enhancer in B-cells 2, p49/p100 (nfkb2), mRNA	8.015	11.424	2.979	2.094	3.102	18.5708	8.399	3.989	3.404	4.253	4.922	6.669	5.197	5.832	12.406	12.574	2.71	5.718	5.6105	3.507	5.56	6.54533
gi|114326402|ref|NM_001048149.1| Danio rerio syndecan 4 (sdc4), mRNA	12.577	33.643	12.7138	3.002	13.0275	6.46575	46.341	24.565	27.27	43.903	54.13	9.53	18.079	22.417	8.592	17.699	16.011	16.673	40.358	14.707	14.0255	13.8987
gi|114703729|ref|NM_212679.2| Danio rerio basic helix-loop-helix family, member e40 (bhlhe40), mRNA	28.32	181.941	36.1755	46.6115	98.1935	88.2917	145.224	103.344	51.313	137.211	207.243	31.833	42.059	62.63	34.325	61.317	69.887	79.199	93.4695	22.149	51.2295	2.72433
gi|115292420|ref|NM_001045092.1| Danio rerio BTB (POZ) domain containing 2 (btbd2), mRNA	0.863	0.3	0.42375	1.1255	0.8725	1.64125	2.014	2.762	0.471	2.142	1.723	1.828	2.11	1.96	2.565	2.43	0.402	0.865	1.6805	2.0405	1.7005	5.602
gi|115312272|ref|NM_001030285.2| Danio rerio ezrin (ezr), mRNA	13.469	7.733	5.1355	7.2865	39.1815	5.033	7.481	18.962	4.426	6.497	9.62	3.307	2.51	1.498	1.685	3.003	2.44	4.239	6.6655	7.4875	4.2655	20.7537
gi|115334666|ref|NM_001048235.1| Danio rerio SLIT-ROBO Rho GTPase activating protein 2a (srgap2a), mRNA	2.121	0.133	0.31625	0.133	0.3335	0.43925	0.634	0	0.399	0.136	0.355	0.171	0.221	0.538	1.293	0.881	0.199	0	1.103	0.13	0.518	0.436333
gi|115430063|ref|NM_001075102.1| Danio rerio zgc:152851 (zgc:152851), mRNA	0.756	0.306	0.13325	0	0.757	0.82275	1.176	1.485	0.275	0.469	0.459	1.966	0.507	0.391	0.262	0	0	0.816	0.034	0	0	4.12033
gi|115430068|ref|NM_001075105.1| Danio rerio apelin receptor a (aplnra), mRNA	0.684	0	0.12225	0	0	0	0.228	0	0.249	0	0	0	0	0	0	0	0	0	0.0975	0.075	0	0.489333
gi|115430072|ref|NM_001075108.1| Danio rerio amplified in osteosarcoma (os9), mRNA	4.592	4.798	1.818	1.5385	3.6915	3.04225	7.985	5.581	4.309	5.785	3.138	6.716	2.743	2.446	3.282	3.455	4.055	2.787	3.013	0.374	3.8275	19.4137
gi|115430074|ref|NM_001075103.1| Danio rerio finTRIM family, member 82 (ftr82), mRNA	19.213	13.505	16.7643	33.4795	12.7305	11.5	36.613	19.283	13.521	21.131	18.963	0	2.568	1.163	0.312	2.793	27.812	13.686	10.927	7.6565	29.8275	2.632
gi|115430076|ref|NM_001075104.1| Danio rerio si:busm1-6a2.1 (si:busm1-6a2.1), mRNA	0	0	0	0	0	0	0	0.17	0	0	0	0	0	0	0	0	0	0.078	0.0615	0	0.0585	9.29333
gi|115430078|ref|NM_001075106.1| Danio rerio zgc:152785 (zgc:152785), mRNA	1.452	0.735	1.09125	0	2.1065	0.1745	1.451	1.711	0	1.351	0.882	0.189	0.487	1.125	0.252	1.059	0.657	2.48	0.338	0.239	2.5315	1.059
gi|115430080|ref|NM_001075109.1| Danio rerio zgc:152774 (zgc:152774), mRNA	0	0.218	0	0	0	0.0365	0	0	0	0	0	0	0.361	0	0	0	0	0	0	0	0	0.0773333
gi|115430084|ref|NM_001075112.1| Danio rerio zgc:153239 (zgc:153239), mRNA	0	0.13	0.04075	0.1125	0	0.06175	0.214	0	0.117	0.266	0.13	0	0	0.083	0	0	0.233	0.116	0.0915	0	0.057	1.173
gi|115430088|ref|NM_001075113.1| Danio rerio ligand of numb-protein X 1 (lnx1), mRNA	0.72	1.751	0.25925	1.2085	1.6915	1.84025	1.577	6.548	0.562	4.275	8.187	1.364	1.242	2.073	0	1.464	0.112	1.221	0.4315	1.1255	0.1925	0.225667
gi|115430090|ref|NM_001075110.1| Danio rerio OTU domain containing 5a (otud5a), mRNA	4.262	2.949	2.48075	0.385	2.664	1.6565	2.792	3.811	2.327	3.464	2.41	1.605	4.437	4.556	2.445	3.539	1.438	1.031	4.3615	0.5035	1.8345	2.38133
gi|115430092|ref|NM_001075115.1| Danio rerio si:dkey-177p2.14 (si:dkey-177p2.14), mRNA	2.003	2.07	0.24675	1.2535	1.612	0.8065	1.668	0.472	1.64	1.242	0.365	0	0.201	1.552	0.208	0.438	0.653	0.432	0.3575	0.6995	1.069	6.945
gi|115430094|ref|NM_001075111.1| Danio rerio hepatocyte nuclear factor 4, gamma (hnf4g), mRNA	1.815	0	0	0	0	0	0	0	0	0	0	0	0	0	0	0	0	0	0.4265	1.621	0	0.725667
gi|115430102|ref|NM_001075116.1| Danio rerio si:dkey-177p2.6 (si:dkey-177p2.6), mRNA	10.721	31.772	46.3543	26.331	8.2835	19.4875	52.692	23.466	99.288	40.248	63.836	12.394	22.922	16.319	28.06	22.839	51.179	90.993	29.733	19.543	67.5685	0.879
gi|115432016|ref|NM_131483.1| Danio rerio hypermethylated in cancer 1 like (hic1l), mRNA	0.921	1.68	0.17175	0.3355	0.1765	0.4515	0.553	0	0.201	0.8	0.672	0	0	0.785	2.107	0.807	0.4	1.69	0.1755	1.1965	0.863	9.75033
gi|115432018|ref|NM_212859.2| Danio rerio tumor necrosis factor a (TNF superfamily, member 2) (tnfa), mRNA	0	1.441	0	0	0	0.04275	5.923	1.397	0	0.735	1.44	16.176	0	4.477	4.928	0.973	0.966	3.517	0.0405	0.049	0	0
gi|115432020|ref|NM_001045121.2| Danio rerio si:ch211-63o20.7 (si:ch211-63o20.7), mRNA	0	0.099	0	0.085	0.2795	0	0.054	0	0.088	0	0	0	0	0	0	0.355	0.088	0	0.403	0	0	2.74433
gi|115432022|ref|NM_001039634.2| Danio rerio wilms tumor 1b (wt1b), mRNA	0.153	1.021	0.146	0.16	0.169	0.145	0.611	0.9	0.25	1.042	0.928	0.477	1.076	0.829	0.794	1.505	0.996	1.483	0.338	0.302	0.7185	0.534333
gi|115432024|ref|NM_212824.2| Danio rerio carbohydrate (chondroitin 4) sulfotransferase 11 (chst11), mRNA	1.135	0.086	0.79825	1.1465	0	0.64975	0.993	0.335	1.085	0.704	0.948	0	0.428	1.155	0.148	0.621	0.925	1.149	0.8485	0.159	1.8585	0.163
gi|115432026|ref|NM_001040249.2| Danio rerio zgc:136875 (zgc:136875), mRNA	3.668	3.836	2.01125	1.5695	2.0345	1.80925	4.449	4.669	1.362	2.275	3.654	1.259	0.886	1.706	1.373	5.621	1.276	4.433	6.447	0.3675	2.15	3.95
gi|115432028|ref|NM_001037390.2| Danio rerio fucosyltransferase 7 (alpha (1,3) fucosyltransferase) (fut7), mRNA	0	0.79	0	0	0	0	0.952	0.918	0	0.322	0	0	0	1.61	1.35	0	0.423	0.981	0	0.171	0	0.218333
gi|115432029|ref|NM_001039639.2| Danio rerio ATP-binding cassette, sub-family G (WHITE), member 2c (abcg2c), mRNA	9.096	11.822	5.178	12.24	11.127	19.926	14.633	26.987	11.045	13.714	12.193	30.338	42.923	28.682	18.423	38.622	6.477	8.461	13.463	3.633	6.47	2.171
gi|115432031|ref|NM_001005778.2| Danio rerio ring finger protein 40 (rnf40), mRNA	9.729	3.878	4.723	5.4045	7.1915	5.85175	5.527	8.083	3.222	7.22	4.456	2.861	11.394	5.376	3.316	4.189	2.86	3.27	12.6295	8.172	7.0255	8.351
gi|115432033|ref|NM_001044830.2| Danio rerio zgc:153031 (zgc:153031), mRNA	0	0	0	0	0	0.1595	0	0	0	0.728	0.119	0	0	0	0	0	0.425	0	0	0	0.052	0.642333
gi|115432034|ref|NM_001044982.2| Danio rerio si:dkey-218l8.1 (si:dkey-218l8.1), mRNA	5.577	7.035	3.3335	1.0915	4.2255	4.7935	7.016	5.259	2.284	6.745	3.811	2.61	3.227	2.809	2.464	2.594	1.742	4.965	12.959	6.0005	2.901	2.58833
gi|115432036|ref|NM_001048067.2| Danio rerio protein-O-mannosyltransferase 1 (pomt1), mRNA	0.749	0.521	0.795	0.5045	2.4825	0.354	1.177	1.892	0.234	1.129	1.82	4.676	11.525	8.752	2.337	7.381	0.407	0.231	0.553	0.0175	0.791	2.08767
gi|115494917|ref|NM_001076618.1| Danio rerio zgc:153760 (zgc:153760), mRNA	0	1.038	0	0	0	0	0.948	1.342	0	0.353	0	0.222	0	1.764	1.183	0	0.155	0.154	0	0	0	0.145667
gi|115494929|ref|NM_001076657.1| Danio rerio zgc:153720 (zgc:153720), mRNA	0.688	0	0.0145	0	0	0	0	0	0	0.284	0.139	0	0	0	0	0	0	0	1.242	0.9145	0.742	0
gi|115494939|ref|NM_001076658.1| Danio rerio zgc:153440 (zgc:153440), mRNA	19.982	46.895	17.8855	12.4275	39.7835	26.26	62.249	38.065	20.93	36.312	19.899	10.874	1.87	8.823	21.738	13.478	14.519	28.957	24.711	24.064	16.666	0.667667
gi|115494957|ref|NM_001076654.1| Danio rerio zgc:153753 (zgc:153753), mRNA	14.798	0.136	0.3185	0	0	0.96025	0.971	0	0.245	0.278	0	0	0	0	0	0	0	0.847	7.4325	1.714	0.361	0.448667
gi|115494959|ref|NM_001076561.1| Danio rerio exotoses (multiple)-like 2 (extl2), mRNA	1.358	1.101	0.552	1.298	2.365	0.90775	2.111	1.334	2.471	1.825	0.825	1.236	0.455	0.789	1.176	1.486	0.615	0.122	5.7885	5.578	0.488	18.9123
gi|115494967|ref|NM_001076656.1| Danio rerio zgc:153723 (zgc:153723), mRNA	0	0	0	0	0	0	0	0	0	0	0	0	0	0	0	0	0	0	0	0	0	1.44333
gi|115494997|ref|NM_001076560.1| Danio rerio fascin homolog 1, actin-bundling protein (Strongylocentrotus purpuratus) (fscn1), mRNA	9.381	3.802	1.0315	2.98	8.8095	3.8865	3.126	5.609	2.821	6.071	6.524	9.226	24.351	10.958	6.36	16.518	1.256	0.073	3.0585	3.441	0.548	7.53133
gi|115495004|ref|NM_001076579.1| Danio rerio zgc:153258 (zgc:153258), mRNA	8.095	0.182	0.328	0	0	0.09025	0.5	0.353	0.082	0.279	1.002	0.117	0	0.407	0	0	0.081	0.081	0.0405	0.0245	0.0795	5.394
gi|115495014|ref|NM_001076580.1| Danio rerio protein phosphatase, Mg2+/Mn2+ dependent, 1Lb (ppm1lb), mRNA	1.19	1.085	0.705	0	0.0635	0.51325	0.661	1.169	0	0.123	0.241	0	0	0	0	0	0.323	0.749	2.999	0	0.9085	0.564333
gi|115495050|ref|NM_001076557.1| Danio rerio zgc:153679 (zgc:153679), mRNA	0.853	1.427	0.29475	0	0.9085	0.302	2.275	2.515	0.116	2.382	0.389	1.165	1.073	2.397	3.105	2.569	0.696	2.072	0.414	0.19	0.2565	7.99833
gi|115495066|ref|NM_001076615.1| Danio rerio CTD (carboxy-terminal domain, RNA polymerase II, polypeptide A) small phosphatase-like b (ctdsplb), mRNA	2.703	4.437	1.59425	2.042	1.6685	7.58425	1.621	2.867	3.689	5.867	2.627	2.741	4.352	7.227	2.529	3.254	0.734	0.729	10.9585	0.9885	7.7495	5.289
gi|115495068|ref|NM_001076616.1| Danio rerio zgc:154097 (zgc:154097), mRNA	62.604	60.518	11.9383	11.876	35.877	31.71	51.789	67.137	18.977	39.277	27.855	43.153	19.96	43.931	27.053	39.041	14.734	18.164	48.09	34.9145	17.3745	1.919
gi|115495148|ref|NM_001076651.1| Danio rerio zgc:154067 (zgc:154067), mRNA	0	0.523	0.11925	0.1125	0.0685	0.31175	1.505	2.028	0.235	1.467	0.915	0.671	0	0.667	0.224	1.648	0.234	0.696	0.3005	0	0.057	15.0867
gi|115495182|ref|NM_001076619.1| Danio rerio bloodthirsty-related gene family, member 12 (btr12), mRNA	15.295	0.332	0.0735	0	0	0	0	0	0.075	0.085	0	0	0	0	0	0	0.074	0	0	3.4785	0.3475	1.57467
gi|115495184|ref|NM_001076620.1| Danio rerio zgc:152830 (zgc:152830), mRNA	7.595	23.277	8.8585	14.941	21.1265	6.9965	20.931	23.124	13.907	9.812	8.361	56.029	37.572	26.3	11.349	23.898	5.502	4.951	10.0905	6.2725	3.7415	6.405
gi|115495218|ref|NM_001076622.1| Danio rerio intelectin 1 (itln1), mRNA	0	0.328	0	0	0	0	0	0	0	0	0.164	0	0	0	0	0	0	0	0	0	0	0.033
gi|115495226|ref|NM_001076659.1| Danio rerio U2AF homology motif (UHM) kinase 1 (uhmk1), mRNA	2.53	0.865	1.1725	0.497	1.35	1.42025	0.843	0.373	0.863	0.588	0.48	0	0.318	0.123	1.973	1.039	0.086	0	2.446	1.6725	0.464	1.61567
gi|115495236|ref|NM_001076661.1| Danio rerio zgc:153595 (zgc:153595), mRNA	0	0	0	0	0.1085	0	0.231	0.545	0	0.573	0.421	0	0.233	0.09	0	0.506	0.251	1.496	0	0.114	0	0.132667
gi|115495286|ref|NM_001076582.1| Danio rerio zgc:153593 (zgc:153593), mRNA	0	1.905	0	0	0	0.0565	1.958	0	0.214	11.904	2.141	312.873	99.324	474.005	515.517	553.496	58.959	8.242	0.167	5.421	0	2.09633
gi|115495296|ref|NM_001076581.1| Danio rerio zgc:153219 (zgc:153219), mRNA	0.155	0	0.00975	0.2435	0.073	0.063	0.052	0	0	0.096	0	0	0	0.12	0	0	0.084	0.167	0.021	0	0.082	0.476333
gi|115495406|ref|NM_001076623.1| Danio rerio protein kinase, cAMP-dependent, regulatory, type I, beta (prkar1b), mRNA	9.497	37.011	4.243	25.5465	192.938	81.1945	21.666	187.998	56.371	52.406	57.982	0	0	0.472	0	0.8	4.234	2.102	1.796	0	0.5595	1.706
gi|115495408|ref|NM_001076624.1| Danio rerio ring finger protein 44 (rnf44), mRNA	3.561	0.197	0.2365	0	0.5105	0.4365	0.755	0.572	0.088	1.606	0.393	0.379	0.326	1.191	1.178	0.531	0.176	0.349	2.516	6.3895	0.6095	1.13467
gi|115495498|ref|NM_001076626.1| Danio rerio zgc:154040 (zgc:154040), mRNA	0	0	0	0	0	0	0	0	0	0	0	1.028	0	0	0	0	0	0.142	0	0	0	2.29333
gi|115495500|ref|NM_001076625.1| Danio rerio zgc:153332 (zgc:153332), mRNA	0	0	0.05525	0.122	0.0745	0.081	0.155	0.274	0.254	0	0	0.182	0	0.09	0	0.255	0	0	0	0	0.251	2.31267
gi|115495502|ref|NM_001076556.1| Danio rerio solute carrier family 35, member F2 (slc35f2), mRNA	1.57	3.075	1.17775	2.096	2.232	1.13425	7.73	3.289	1.619	5.3	4.767	0	0.175	1.149	0.725	1.336	0.569	1.506	4.4545	0.2125	4.378	17.778
gi|115495542|ref|NM_001076627.1| Danio rerio basal cell adhesion molecule (Lutheran blood group) (bcam), mRNA	0	2.881	0.43225	0.184	0.4975	1.12225	4.152	1.655	1.246	6.857	2.345	0	0.53	0.272	0.182	0.192	1.335	5.397	2.4695	2.3015	1.501	2.441
gi|115495544|ref|NM_001076628.1| Danio rerio zgc:153974 (zgc:153974), mRNA	2.264	4.244	6.90775	9.0135	9.9195	4.3615	6.853	17.345	4.532	7.371	10.887	5.445	7.214	7.603	18.828	13.216	2.563	5.497	9.718	0.323	7.0565	1.654
gi|115495642|ref|NM_001076593.1| Danio rerio zgc:153394 (zgc:153394), mRNA	0	0	0	0	0	0.1085	0	0	0	0	0	0	0	0	0	0	0	0	0	1.3015	0	0.162333
gi|115495644|ref|NM_001076594.1| Danio rerio SET and MYND domain containing 4 (smyd4), mRNA	0.558	0.255	0	0.4	0.618	1.0925	0.698	0.658	0.076	0.26	1.187	0	0.14	0.974	0	0.764	0.455	1.13	2.2485	0	0.3185	0.969333
gi|115495654|ref|NM_001076662.1| Danio rerio sideroflexin 4 (sfxn4), mRNA	1.737	1.056	0.5945	2.2665	0.5975	3.18875	1.254	0.682	1.896	0	0.352	1.355	2.039	0.673	0	0.95	0.629	0.156	0.6795	0.42	4.0725	6.42333
gi|115495664|ref|NM_001076660.1| Danio rerio FAD-dependent oxidoreductase domain containing 2 (foxred2), mRNA	0.636	0.851	0	0.698	0.241	0.728	0.466	0.3	0.139	1.026	0.155	0.099	1.792	0.789	0	0.975	0.138	0.206	2.5955	0.084	0.0675	0.529
gi|115495712|ref|NM_001076631.1| Danio rerio zgc:153696 (zgc:153696), mRNA	0	0.102	0	0	0	0	0.056	0	0.551	0	0.307	0	0	0	0	0	0.091	0	0.023	0	0	2.62033
gi|115495714|ref|NM_001076591.1| Danio rerio mediator complex subunit 19a (med19a), mRNA	4.606	12.201	1.572	1.116	1.8215	3.14975	15.021	5.429	0.898	15.304	4.596	27.204	3.311	10.709	13.339	12.604	2.682	7.456	6.4175	6.516	4.956	5.73133
gi|115495716|ref|NM_001076592.1| Danio rerio zgc:153702 (zgc:153702), mRNA	0	12.539	0	0	0	0.10625	30.807	4.341	0	9.594	0.671	6.608	0	53.375	48.626	1.209	7.405	50.077	0.4005	0.1215	0.293	0.913667
gi|115495718|ref|NM_001076639.1| Danio rerio zgc:153018 (zgc:153018), mRNA	1.897	1.441	0.47825	0.5795	2.5215	0.39275	2.423	3.54	0.345	2.157	3.552	0.123	6.68	2.266	2.301	2.941	1.288	5.97	1.7885	2.3545	1.548	2.48467
gi|115495786|ref|NM_001076632.1| Danio rerio solute carrier family 25 (mitochondrial oxodicarboxylate carrier), member 21 (slc25a21), nuclear gene encoding mitochondrial protein, mRNA	0	0.84	0.09825	0	0	0.05425	0.058	0.407	0	0.107	0.315	0	0	0.067	0	0	0	0	0	0	0.162	2.223
gi|115495790|ref|NM_001076589.1| Danio rerio zgc:153286 (zgc:153286), mRNA	3.713	4.277	3.88675	6.3685	5.764	6.50375	6.707	5.758	3.734	6.302	5.697	4.268	1.77	2.801	0.203	2.139	7.114	2.214	8.093	0.3995	5.896	3.461
gi|115495796|ref|NM_001076638.1| Danio rerio zgc:153032 (zgc:153032), mRNA	3.815	5.377	4.5915	8.9645	2.1345	10.7508	6.241	5.315	7.196	5.378	1.369	4.735	2.269	3.763	1.623	3.417	1.79	0.842	2.134	3.1145	2.4465	4.00733
gi|115495856|ref|NM_001076590.1| Danio rerio zgc:153409 (zgc:153409), mRNA	0	0	0	0	0	0.43325	0	0	0	0	0	0	0.887	0	0	0	0	0	0	0	0	0
gi|115495914|ref|NM_001076665.1| Danio rerio zgc:154045 (zgc:154045), mRNA	0.655	3.186	0.49275	0.984	7.8005	5.60775	3.057	7.336	2.325	1.727	6.964	0	0.989	1.079	0.511	3.765	2.225	5.214	2.3015	1.7435	1.1375	4.472
gi|115495916|ref|NM_001076666.1| Danio rerio bloodthirsty-related gene family, member 16 (btr16), mRNA	0	0	0	0	0	0	0.056	0	0	0	0.203	0	0	0	0	0.183	0	0	0	0	0.0445	4.64767
gi|115496038|ref|NM_001076613.1| Danio rerio family with sequence similarity 102, member Ab (fam102ab), mRNA	0	0	0	0	0	0	0	0	0	0.252	0	0	0	0.053	0.141	0	0	0.512	0	0	0.091	0.786
gi|115496040|ref|NM_001076614.1| Danio rerio zgc:152927 (zgc:152927), mRNA	0.914	2.314	1.164	0.558	3.166	2.44025	4.465	4.127	1.164	2.738	2.219	1.188	1.685	0.649	0.158	1.167	2.068	3.532	2.2845	2.7095	0.549	3.00733
gi|115496056|ref|NM_001076555.1| Danio rerio interferon-related developmental regulator 1 (ifrd1), mRNA	35.093	37.047	6.27975	4.6295	18.537	11.903	33.195	15.343	9.373	44.463	36.556	17.365	11.96	32.166	37.46	55.755	7.279	25.346	32.701	24.9495	27.3795	14.6887
gi|115496104|ref|NM_001076612.1| Danio rerio zic family member 4 (zic4), mRNA	0	0	0.00975	0	0.0715	0	0.102	0	0.25	0	0.185	0	0	0	0	0	0	0	0	0	0.205	0.136667
gi|115496160|ref|NM_001076584.1| Danio rerio zgc:154037 (zgc:154037), mRNA	0.474	0.721	0.33875	0	0.8985	0.24725	0.316	0.838	0.259	0.882	0.144	0	0.716	0.092	0	0.778	0.386	1.535	0.4645	0	0.285	1.432
gi|115496162|ref|NM_001076664.1| Danio rerio ferredoxin 1-like (fdx1l), nuclear gene encoding mitochondrial protein, mRNA	74.225	45.304	37.918	17.118	66.784	73.371	56.818	67.808	52.565	36.234	21.546	16.973	20.996	42.042	26.339	43.719	68.515	17.047	70.689	15.687	39.3615	3.24933
gi|115496182|ref|NM_001076663.1| Danio rerio zgc:153107 (zgc:153107), mRNA	4.276	3.215	0.5005	1.7925	4.0685	1.3665	2.737	3.58	1.536	3.21	1.23	0.263	1.245	1.918	2.924	2.093	0.978	1.457	1.4215	1.157	0.2405	2.403
gi|115496211|ref|NM_001076577.1| Danio rerio regulator of G-protein signaling 9 (rgs9), mRNA	0	0	0.26575	3.3295	0.913	0.65575	0.483	0	7.275	0.18	0.352	0.452	2.332	0	0	0.317	0.472	0.313	0.77	0	2.7135	0.840667
gi|115496215|ref|NM_001076611.1| Danio rerio immunity-related GTPase family, f4 (irgf4), mRNA	0	0	0	0	0	0	0	0	0	0	0	0	0	0	0	0	0	0	0	0	0	0.228
gi|115496227|ref|NM_001076608.1| Danio rerio regulator of G-protein signaling 7 binding protein a (rgs7bpa), mRNA	0	0	0	0	0	0.0515	0.055	0	0	0	0	0	0	0	0	0	0	0.266	0	0	0	0.371333
gi|115496275|ref|NM_001076650.1| Danio rerio zgc:153847 (zgc:153847), mRNA	2.255	7.227	4.8245	7.7025	7.7925	6.69175	11.816	9.18	3.133	8.898	3.61	0.799	1.237	2.144	1.278	2.019	4.344	8.183	10.299	4.465	7.289	3.081
gi|115496281|ref|NM_001076653.1| Danio rerio steroid-5-alpha-reductase, alpha polypeptide 1 (3-oxo-5 alpha-steroid delta 4-dehydrogenase alpha 1) (srd5a1), mRNA	0	0.23	0.033	0	0.089	0	0.063	0	0.103	0	0	0.148	0	0	0	0	0.103	0	0	0.031	0	0.354
gi|115496359|ref|NM_001076576.1| Danio rerio zgc:153722 (zgc:153722), mRNA	0	0	0	0.426	0	0.04775	0.234	0.276	0	0.145	0.284	0	0	0	0.486	0	0.127	0.505	0	0	0	0.971667
gi|115496365|ref|NM_001076578.1| Danio rerio zgc:153633 (zgc:153633), mRNA	0.406	0.493	0.06075	0	0.0645	0.1635	1.149	1.674	0	1.132	0.616	0.791	0.204	0.943	0	0.666	1.874	0.876	0.252	0.314	0.1365	2.27733
gi|115496387|ref|NM_001076573.1| Danio rerio zgc:154058 (zgc:154058), mRNA	0.747	0.606	0.61175	0	0.8975	0.38875	1.494	0.881	0.272	1.699	0.303	0	0	0.29	0.777	0.273	0.271	0.806	1.59	3.061	0.634	0.535333
gi|115496393|ref|NM_001076574.1| Danio rerio zgc:152658 (zgc:152658), mRNA	0	1.732	0	0	0	0	3.452	1.526	0	0.642	0.315	1.212	0	5.719	5.384	0	0.704	6.985	0	0	0	0.609
gi|115496535|ref|NM_001076607.1| Danio rerio zgc:153941 (zgc:153941), mRNA	0	0.292	0	0	0	0	0.053	0	0	0	0.195	6.621	0	0	0	0	0	0	1.063	0	0	0.664333
gi|115496537|ref|NM_001076609.1| Danio rerio vacuolar protein sorting 4a (yeast) (vps4a), mRNA	0.443	0.404	0.53675	0	0.316	0.29275	0.221	0	0	0	1.076	0	0	0.172	0	0.969	0.241	0	0.679	0.956	0.0585	1.418
gi|115496565|ref|NM_001076571.1| Danio rerio zgc:154100 (zgc:154100), mRNA	3.388	3.476	4.52825	3.152	2.642	1.8405	2.822	2.995	4.046	3.02	1.158	5.616	4.261	6.072	2.201	3.245	4.142	3.999	4.245	4.738	3.099	4.27967
gi|115496571|ref|NM_001076572.1| Danio rerio zgc:154074 (zgc:154074), mRNA	1.57	0.239	0.11775	0	0.276	0	0.262	0	0	0	0.119	0	0	0.532	0.408	0.429	0.107	0.106	0.5975	1.797	0.08	0.514333
gi|115496583|ref|NM_001076605.1| Danio rerio zgc:152948 (zgc:152948), mRNA	1.488	1.306	0.40875	0.5195	1.83	2.222	1.157	1.169	0.722	1.64	2.51	0	1.164	0.576	0.516	1.267	0	0	0.8595	4.816	0.6865	2.33533
gi|115496585|ref|NM_001076606.1| Danio rerio family with sequence similarity 125, member B, duplicate a (fam125ba), mRNA	0.505	1.329	0.097	0	0.0535	0.475	1.121	0.396	0.184	1.252	2.962	0	0.169	0.586	1.049	1.104	0.091	1.815	0.986	0.1665	0.3385	1.64633
gi|115496695|ref|NM_001076673.1| Danio rerio transmembrane protein 229B (tmem229b), mRNA	0.457	4.586	0.7615	0.1195	0.862	1.51375	6.398	2.425	0.374	7.372	2.36	0	0	0.177	0.475	0.25	2.36	1.357	4.6225	1.5065	1.414	0.176
gi|115496719|ref|NM_001076559.1| Danio rerio insulin-like growth factor 2 mRNA binding protein 1 (igf2bp1), mRNA	9.349	17.321	4.26375	3.2525	5.2985	1.97425	13.005	24.661	3.646	22.179	10.185	6.829	7.764	11.787	5.245	9.095	7.096	13.37	8.159	7.726	6.586	0.683333
gi|115496781|ref|NM_001076569.1| Danio rerio zgc:153980 (zgc:153980), mRNA	3.179	3.328	1.433	1.3825	4.2115	0.804	4.825	3.954	1.543	5.257	3.539	4.408	5.153	6.637	2.203	6.185	4.99	5.907	1.837	0.85	2.038	14.21
gi|115496787|ref|NM_001076570.1| Danio rerio ring finger protein 220a (rnf220a), mRNA	1.017	0.495	1.17525	0	1.389	0.95375	1.83	0.719	0.555	2.018	0.741	0	0.819	0.552	0	1.336	0.221	0.329	6.765	0	1.7725	2.41433
gi|115496859|ref|NM_001076671.1| Danio rerio zgc:153352 (zgc:153352), mRNA	0.159	0.097	0.09675	0	0.8275	0.56425	0.53	0.938	0.261	0.197	0.193	0	0	0	0	0.871	0	0	0.6615	0.3985	0.6415	6.81833
gi|115496863|ref|NM_001076672.1| Danio rerio PTK6 protein tyrosine kinase 6b (ptk6b), mRNA	0.145	0.088	0	0	0	0	0.242	0	0	0	0	0	0	0.225	0.302	0	0	0.078	0.0195	0	0	1.765
gi|115496885|ref|NM_001076558.1| Danio rerio basic transcription factor 3 (btf3), mRNA	166.432	979.085	69.6153	17.759	107.2	76.055	506.025	475.207	50.209	625.811	490.943	695.499	172.265	851.651	1442.3	659.325	153.029	674.561	173.985	92.332	118.868	57.348
gi|115496915|ref|NM_001076647.1| Danio rerio zgc:153893 (zgc:153893), mRNA	0	0	0	0	0	0	0	0	0	0	0	0.858	0.83	0.213	0	0.602	0.149	0	0	0	0	3.04333
gi|115496921|ref|NM_001076649.1| Danio rerio zgc:153846 (zgc:153846), mRNA	0	0	0	0	0	0	0	0	0	0	0	0	0	0	0	0	0	0	0	0	0	27.6867
gi|115497011|ref|NM_001076604.1| Danio rerio UDP-N-acetyl-alpha-D-galactosamine:polypeptide N-acetylgalactosaminyltransferase 10 (GalNAc-T10) (galnt10), mRNA	4.701	1.588	2.19675	2.6635	6.9975	7.396	2.088	3.078	0.143	2.267	1.586	4.074	3.416	1.417	1.086	1.715	0.284	0.423	4.9465	4.9565	1.8185	0.426667
gi|115497061|ref|NM_001076567.1| Danio rerio lin-54 homolog (lin54), mRNA	1.194	0.726	0.27925	0.4415	0.9765	0.71625	0.497	0.586	0.109	0.864	0.967	0	0.701	0.617	0.103	0.653	0.162	0.268	0.852	0.2265	0.934	2.065
gi|115497135|ref|NM_001076645.1| Danio rerio zgc:153901 (zgc:153901), mRNA	0.216	0.79	1.01175	0.394	0.5805	0.6995	0.938	0.255	1.064	1.208	0.92	0	0.653	0.419	0.45	0.237	0.706	2.803	1.3905	0.856	0.696	1.30933
gi|115497141|ref|NM_001076646.1| Danio rerio heparan sulfate (glucosamine) 3-O-sulfotransferase 3B1a (hs3st3b1a), transcript variant 2, mRNA	0	0	0	0	0	0	0	0	0	0	0	0	0	0	0	0	0	0	0	0	0	6.15133
gi|115497213|ref|NM_001076633.1| Danio rerio zgc:153372 (zgc:153372), mRNA	0	0.271	0.36975	1.2835	0.142	1.13925	0.891	0.525	0.852	0.276	0.271	0.174	0.224	0.95	3.012	0	3.391	2.164	0.528	0.1615	2.6595	0.510667
gi|115497219|ref|NM_001076669.1| Danio rerio zgc:153292 (zgc:153292), mRNA	0	0	0.01425	0	0	0.16775	0.075	0.265	0	0.14	0.273	0	0	0.087	0	0	0	0	0	0	0.0595	4.10133
gi|115497275|ref|NM_001076642.1| Danio rerio zgc:153118 (zgc:153118), mRNA	0	0	0	0	0	0	0	0	0	0	0	0	0	0	0.548	0	0	0	0	0	0	0.460667
gi|115497285|ref|NM_001076644.1| Danio rerio zgc:153463 (zgc:153463), mRNA	1.34	0.724	0.923	1.7455	4.3755	0.77775	2.332	4.037	0.163	2.124	1.266	2.555	3.746	2.654	2.786	2.282	0.971	2.41	4.2775	0.049	2.6745	2.49067
gi|115497341|ref|NM_001076602.1| Danio rerio solute carrier family 25, member 38a (slc25a38a), mRNA	3.112	1.622	1.254	0	0.142	0.4165	1.333	1.048	0.85	1.792	0.54	153.799	76.05	109.907	67.939	66.179	4.228	0.959	0.5305	2.3585	0.059	0.464
gi|115497355|ref|NM_001076600.1| Danio rerio TRAF family member-associated NFKB activator (tank), mRNA	0.213	1.816	0.42475	0.335	1.5135	0.66575	1.137	1.006	1.165	0.397	0.907	0	7.514	5.869	4.436	5.137	0.58	2.302	0.087	0	0.343	1.525
gi|115497451|ref|NM_001076641.1| Danio rerio zgc:153138 (zgc:153138), mRNA	0	0	0	0	0	0	0.3	0	0	0.224	0.109	0	0	0.07	0	0	0.098	0	0.0245	0	0	0.187333
gi|115497491|ref|NM_001076637.1| Danio rerio phosphoethanolamine methyltransferase (pmt), mRNA	2.504	1.631	3.008	1.168	1.322	0.664	2.741	3.161	1.855	0.887	2.498	1.813	0.54	0.624	0	0.783	2.041	3.956	0.274	4.7375	3.252	3.60567
gi|115497493|ref|NM_001076630.1| Danio rerio zgc:153296 (zgc:153296), mRNA	4.878	5.855	3.09225	1.7625	4.1405	1.924	7.169	6.487	2.117	4.344	5.242	1.171	0.881	1.599	2.861	3.696	1.495	1.89	4.549	1.525	3.7185	3.36133
gi|115497503|ref|NM_001076629.1| Danio rerio mesencephalic astrocyte-derived neurotrophic factor (manf), mRNA	5.506	18.967	4.20575	7.338	2.8985	7.18525	23.036	10.455	5.678	6.64	1.672	18.372	2.462	21.452	15.263	3.013	10.139	24.755	4.553	0.2725	2.017	16.0827
gi|115497541|ref|NM_001076640.1| Danio rerio transmembrane protein 178 (tmem178), mRNA	0	0	0	0	0	0	0	0	0	0	0	0	0	0.061	0	0	0	0	0.064	0	0.1465	0.112667
gi|115497553|ref|NM_001076597.1| Danio rerio abhydrolase domain containing 12 (abhd12), mRNA	0.189	0.344	0	0.344	0.241	0.647	0.755	1.781	0.206	1.171	2.065	8.103	0.57	1.244	1.571	1.654	0.308	1.427	0.4435	0	0.2	2.63333
gi|115497563|ref|NM_001076596.1| Danio rerio mitochondrial ribosomal protein S5 (mrps5), nuclear gene encoding mitochondrial protein, mRNA	15.778	13.977	3.96225	2.2365	20.923	11.237	19.003	16.737	7.753	13	12.458	24.086	9.752	22.707	11.013	15.049	14.575	7.54	11.579	9.0465	8.351	7.65667
gi|115497573|ref|NM_001076585.1| Danio rerio zgc:153993 (zgc:153993), mRNA	11.706	13.663	5.51575	16.1235	24.2265	7.38175	9.283	28.421	31.442	9.147	9.101	3.104	16.96	10.613	10.465	11.018	3.816	4.294	7.7965	2.7695	7.6355	2.41633
gi|115497577|ref|NM_001076598.1| Danio rerio zgc:153677 (zgc:153677), mRNA	0	1.047	0.1855	0	1.0985	0.516	1.148	2.03	0.94	1.424	1.046	0.448	1.155	0	0.597	1.256	0.936	3.097	0.312	0	0.304	5.67067
gi|115497603|ref|NM_001076563.1| Danio rerio WD repeat domain 74 (wdr74), mRNA	1.579	1.508	0.38325	1.063	1.1765	2.29525	0.451	1.063	0.493	1.958	1.096	2.991	2.043	0.175	0	0	0.123	0	3.646	0	0.6935	4.41567
gi|115497613|ref|NM_001076565.1| Danio rerio MPN domain containing (mpnd), mRNA	3.071	1.349	0.26925	0.8465	4.5245	1.263	0.91	3.419	1.025	2.011	1.244	0.932	4.464	3.967	1.951	2.988	0.278	1.749	2.8415	0.1405	0.914	1.35567
gi|115497841|ref|NM_001076668.1| Danio rerio zgc:153310 (zgc:153310), mRNA	3.286	0	0.4035	0.191	0	0.2245	0	0	0	0	0.222	0.712	0	0.071	0.759	0.4	3.274	0	0	0	0	0.815
gi|115497851|ref|NM_001076667.1| Danio rerio dynein, cytoplasmic 1, intermediate chain 2a (dync1i2a), mRNA	37.907	36.014	15.7758	46.9545	64.3475	117.403	45.592	71.485	32.535	43.082	28.807	41.807	54.996	49.939	19.245	48.63	8.431	11.415	28.7325	14.7165	16.4425	4.095
gi|115497893|ref|NM_001076601.1| Danio rerio zgc:153046 (zgc:153046), mRNA	6.705	2.594	1.69425	0.6385	4.335	1.85025	3.555	4.67	0.666	3.213	2.036	5.706	5.213	1.299	2.852	0.667	0.828	0	0.0415	4.0775	0.776	3.318
gi|115497911|ref|NM_001076599.1| Danio rerio zgc:153947 (zgc:153947), mRNA	0	0.267	0.0795	0.7435	0.07	0.1135	0.877	0.517	0.12	0.544	0.932	0.342	0.221	0.51	1.14	0.48	0.477	3.667	0.149	0	0.2635	2.617
gi|115497973|ref|NM_001076564.1| Danio rerio serum/glucocorticoid regulated kinase 2b (sgk2b), mRNA	0	0.341	0.208	0.098	0.119	0.18825	0.996	0.44	0.51	0.579	0.794	0.583	0	0.145	0	0	0.102	0.504	0.0255	0.0615	0.175	1.06667
gi|115497985|ref|NM_001076636.1| Danio rerio zgc:153039 (zgc:153039), mRNA	8.849	24.593	8.12275	3.1315	18.925	15.3102	31.735	15.645	12.883	19.993	11.39	35.499	11.872	34.044	17.522	17.757	8.129	9.321	26.3415	8.575	7.7015	0.492333
gi|115529286|ref|NM_001076705.1| Danio rerio zgc:153059 (zgc:153059), mRNA	0	0.11	0.0115	0	0.1995	0.301	0.66	1.486	0.197	0.112	1.204	0	0.181	0.209	0.187	0.197	0.098	0.972	0.9335	1.763	0.5315	0.765333
gi|115529288|ref|NM_001076707.1| Danio rerio abl-interactor 1b (abi1b), mRNA	1.346	0.205	0.251	0	0	0.02425	0.168	0.198	0	0.104	0.102	0	0	0	0	0.184	0	0.726	0.839	0	0	0.315667
gi|115529290|ref|NM_001076710.1| Danio rerio zgc:152891 (zgc:152891), mRNA	0	0.093	0	0	0	0	0	0	0	0	0	0	0	0	0	0	0	0	0	0	0	0.611333
gi|115529292|ref|NM_001076708.1| Danio rerio neuralized homolog b (Drosophila) (neurlb), mRNA	0.269	0	0	0.0705	0	0.0745	0	0	0.368	0.084	0	0	0	0.261	0	0	0	0	0	0	0.0355	0.724333
gi|115529294|ref|NM_001076709.1| Danio rerio zgc:152692 (zgc:152692), mRNA	0	0.122	0.301	0	0	0.2145	0.201	0.236	0	0.124	0	0	0	0.466	0.417	0	0.218	0	0	0	0.1595	0.0353333
gi|115529296|ref|NM_001076711.1| Danio rerio zgc:152982 (zgc:152982), mRNA	0.187	0.34	0.36	0.219	1.3505	0.13925	0.591	1.21	0.255	0.637	1.758	0.073	0.657	0.76	0.388	1.941	0.457	0.755	0.203	0.046	0.526	0.146667
gi|115529298|ref|NM_001076713.1| Danio rerio zgc:153444 (zgc:153444), mRNA	71.957	185.969	146.13	210.452	128.596	163.605	350.338	130.348	418.778	394.16	196.138	2.488	27.107	8.515	2.948	20.562	158.517	199.657	170.392	59.2325	212.999	0.283333
gi|115529304|ref|NM_001076716.1| Danio rerio RNA binding motif, single stranded interacting protein (rbms3), mRNA	0.775	0.589	0.41625	0.657	1.374	1.8265	0.968	1.598	0.423	1.201	2	0.151	0.39	0.976	0.806	0.424	0.211	0	0.782	0.8045	0.26	0.0683333
gi|115529308|ref|NM_001076719.1| Danio rerio zgc:153369 (zgc:153369), mRNA	3.324	0.119	0.4135	0.663	0.8035	0.8305	0.652	2.535	0.747	0	0.119	0.305	0.984	0.152	0	0	0.212	0	2.091	0	0.2075	7.309
gi|115529310|ref|NM_001076718.1| Danio rerio a disintegrin and metallopeptidase domain 28 (adam28), mRNA	0	0	0	0	0	0	0	0	0	0	0	0	0.229	0	0	0	2.598	0	0	0	0	0.437667
gi|115529312|ref|NM_001076720.1| Danio rerio zgc:153047 (zgc:153047), mRNA	12.946	10.202	7.1895	11.382	7.454	17.9342	11.663	9.607	7.853	9.813	6.261	11.033	6.513	6.224	3.738	8.659	1.954	5.691	13.344	6.4225	10.128	6.197
gi|115529314|ref|NM_001076721.1| Danio rerio zgc:152925 (zgc:152925), mRNA	32.987	11.788	10.8803	10.5315	10.175	34.4492	18.196	13.397	11.316	6.497	0.406	16.342	2.467	6.045	0.232	3.415	6.298	3.968	46.4915	10.312	3.754	2.849
gi|115529316|ref|NM_001076722.1| Danio rerio zgc:154061 (zgc:154061), mRNA	0	0.539	0.01125	0	0.2795	0.20875	0	0.418	0.097	0.22	0.108	0	0	0	0	0.388	0.096	0	0.048	0	0.26	3.06033
gi|115529318|ref|NM_001076723.1| Danio rerio UDP glucuronosyltransferase 5 family, polypeptide A2 (ugt5a2), mRNA	0	0	0	0	0	0	0	0	0	0.507	0.397	0	0	0	0	0	0.089	0.706	0	0	0.769	5.35567
gi|115529320|ref|NM_001076724.1| Danio rerio zgc:154027 (zgc:154027), mRNA	0	0	0	0	0.2645	0	0	0	0	0	0	0.145	0	0	0	0	0	0.3	0.1295	0	0	6.50367
gi|115529330|ref|NM_001076727.1| Danio rerio solute carrier family 17 (anion/sugar transporter), member 5 (slc17a5), mRNA	0.311	0.472	0.081	0.0815	0.172	0.0935	0.621	0.366	0.254	0.578	1.132	1.938	2.344	0.421	0	0	0.169	1.173	0.241	0.1125	0.4615	2.258
gi|115529332|ref|NM_001076725.1| Danio rerio mitochondrial ribosomal protein L35 (mrpl35), nuclear gene encoding mitochondrial protein, mRNA	13.589	13.157	4.44275	2.2335	14.544	5.16	18.616	8.305	3.847	7.491	3.057	5.104	8.103	14.041	11.51	12.119	15.588	7.06	13.87	8.674	1.6905	1.809
gi|115529334|ref|NM_001076726.1| Danio rerio zgc:153704 (zgc:153704), mRNA	0.439	0.8	0.14575	0	0.206	0.1265	0.877	0	0.24	0.544	0.8	1.027	0	0	0	0	0.238	0.71	0.307	0.3615	0	1.207
gi|115529336|ref|NM_001076730.1| Danio rerio zgc:153610 (zgc:153610), mRNA	0.263	0.32	2.4345	0.8925	2.662	1.0645	0.965	1.551	1.58	0.163	0.799	0.411	1.324	1.224	0	1.728	0.429	1.42	0.327	0.9625	0.3905	2.64
gi|115529338|ref|NM_001076728.1| Danio rerio zinc and ring finger 2 (znrf2), mRNA	0.202	7.356	0.6275	1.368	0.734	0.78825	13.71	6.18	1.321	7.004	1.47	5.663	0.203	23.991	22.223	1.545	5.589	32.317	0.137	0.033	2.378	1.88867
gi|115529340|ref|NM_001076729.1| Danio rerio zgc:152857 (zgc:152857), mRNA	0	0	0	0	0	0	0	0	0	0	0	0	0	0	0	0	0	0	0	0	0	0
gi|115529342|ref|NM_001076733.1| Danio rerio lectin, mannose-binding 2-like b (lman2lb), mRNA	4.982	6.975	2.8865	1.653	4.64	0.35575	8.25	10.498	2.308	4.494	6.786	3.768	3.646	2.223	0.785	2.148	4.266	6.435	0.8175	0.527	4.3365	6.92733
gi|115529346|ref|NM_001076732.1| Danio rerio ribosomal protein S16 (rps16), mRNA	372.076	1220.07	755.187	301.491	495.473	496.14	1021.98	827.186	393.16	968.453	628.484	1672.83	938.813	1600.05	1100.59	1038.49	904.468	562.35	692.846	604.152	350.387	57.4727
gi|115529348|ref|NM_001076735.1| Danio rerio cadherin 18, type 2 (cdh18), mRNA	0	0	0	0	0	0	0	0	0	0	0	0	0	0	0	0	0	0	0	0	0.0885	0.149333
gi|115529350|ref|NM_001076734.1| Danio rerio zgc:153813 (zgc:153813), mRNA	13.758	9.448	3.5585	5.848	6.5565	6.13875	7.598	10.66	3.964	13.193	7.892	9.837	8.075	6.614	3.575	7.808	7.752	3.711	6.8185	6.7625	10.092	0.732667
gi|115529356|ref|NM_001076738.1| Danio rerio COMM domain containing 4 (commd4), mRNA	3.53	7.082	3.607	7.737	15.89	6.6895	9.528	13.313	10.985	8.1	7.719	3.855	12.787	16.96	13.944	17.386	5.371	5.523	9.2135	3.292	3.731	7.56067
gi|115529358|ref|NM_001076740.1| Danio rerio zgc:153061 (zgc:153061), mRNA	104.222	114.719	188.945	93.6805	150.844	323.909	191.226	101.314	142.701	163.82	80.669	89.638	158.507	147.879	115.628	183.118	83.493	118.729	305.372	135.63	143.583	0.871667
gi|115529362|ref|NM_001076741.1| Danio rerio zgc:153027 (zgc:153027), mRNA	0	0.145	0.1595	0	0	0.03425	0.158	0	0	0.295	0.289	0	0	0.092	0	0	0.129	0.257	0	0	0	0.133667
gi|115529364|ref|NM_001076743.1| Danio rerio zgc:153924 (zgc:153924), mRNA	3.239	0.985	0.4305	1.593	2.387	2.73425	0.66	2.545	0.982	0.893	1.64	0.14	3.44	2.719	2.245	2.167	1.076	2.719	1.219	2.882	0.191	0.683
gi|115529368|ref|NM_001076744.1| Danio rerio zgc:152904 (zgc:152904), mRNA	0	0	0	0	0	0	0	0	0	0	0	1.033	1.333	0.158	0	0.223	0	0	0	0	0	0.261
gi|115529370|ref|NM_001076745.1| Danio rerio zgc:154071 (zgc:154071), mRNA	0	1.229	0.01075	0	0	0.03425	2.358	0.596	0	0.523	0.921	1.709	0.17	2.677	1.577	0.369	0.183	1.546	0.2355	0.178	0.0445	6.90633
gi|115529374|ref|NM_001076747.1| Danio rerio zgc:153717 (zgc:153717), mRNA	0	0.897	0.02325	0	0	0.20325	0.614	0	0	0.229	0.672	0	0	0	2.683	0	0	0.398	0.1	0	0.0975	0.427667
gi|115529378|ref|NM_001076749.1| Danio rerio zgc:154164 (zgc:154164), mRNA	0	0	4.9355	3.259	1.878	8.095	2.316	0.819	2.277	0	0.844	0	0	0	0.723	0.761	1.889	1.875	0.0945	0	0.737	0
gi|115529380|ref|NM_001076750.1| Danio rerio LysM, putative peptidoglycan-binding, domain containing 1 (lysmd1), mRNA	0.672	1.022	0.51075	0.44	0.981	0.888	2.465	8.916	0.826	1.668	2.553	0.656	0.507	0.651	0.349	0.368	0.274	0.816	0.4175	0.4485	0.4725	9.17033
gi|115529382|ref|NM_001076751.1| Danio rerio zgc:153684 (zgc:153684), mRNA	1.401	3.3	1.19075	3.8385	5.4125	7.578	4.085	7.018	2.295	6.734	4.042	0.137	0.176	2.171	1.638	2.684	5.329	5.291	11.7495	6.0535	4.1855	6.339
gi|115529384|ref|NM_001076752.1| Danio rerio zgc:153668 (zgc:153668), mRNA	0	0.28	0	0	0	0	0.614	0.543	0	0.572	0	0	0	0.714	0.958	0	0	0	0	0	0	0
gi|115529386|ref|NM_001076753.1| Danio rerio zgc:153465 (zgc:153465), mRNA	0	0.25	0.107	0.1075	0	0.2495	0.274	0.727	0.674	0.383	1	0	1.035	0.478	0.214	0.225	0.224	2.664	0.028	0	0.578	0.806
gi|115529388|ref|NM_001076755.1| Danio rerio zgc:153206 (zgc:153206), mRNA	4.005	5.299	1.4305	2.949	7.267	4.782	6.28	8.052	3.73	8.035	4.579	9.371	4.978	7.028	3.918	6.446	1.536	2.669	5.7745	4.3935	4.6135	3.30133
gi|115529390|ref|NM_001076756.1| Danio rerio zgc:153477 (zgc:153477), mRNA	0	0.34	0.42875	0.4885	0.6165	0.27525	0.311	0.44	0.815	0.694	0.793	0	0.375	0	0	0.408	0.101	0.503	0.6665	0.1965	0.2245	3.07067
gi|115529392|ref|NM_001076754.1| Danio rerio zgc:152945 (zgc:152945), mRNA	0	0	0	0	0	0	0	0	0	0	0	0	0	0	0	0	0.13	0	0	0	0	3.998
gi|115529394|ref|NM_001076757.1| Danio rerio platelet derived growth factor alpha b (pdgfab), mRNA	0.539	2.949	3.044	0.188	1.9555	1.295	2.335	3.177	0.687	1.894	1.419	0	0	0.418	0	0	8.494	2.714	1.1365	1.095	0.991	0.543667
gi|115529396|ref|NM_001076759.1| Danio rerio zgc:153062 (zgc:153062), mRNA	0.274	0.417	0.4015	0.072	1.0575	2.7615	0.411	1.131	1.497	0	0.75	0	0.138	0	0.143	0	0	0.222	3.2385	0	1.326	0.524
gi|115529398|ref|NM_001076758.1| Danio rerio zgc:154018 (zgc:154018), mRNA	0	0.235	0	0.101	0.0615	0.03925	0.515	0	0	0	0.352	0	0	0.225	0.804	0	0.105	0.521	0	0	0.0785	0.0553333
gi|115529400|ref|NM_001076761.1| Danio rerio zgc:153922 (zgc:153922), mRNA	0	0	0	0	0	0	0	0	0	0	0	0	0	0	0	0	0	0.125	0.1935	0	0	0
gi|115529402|ref|NM_001076760.1| Danio rerio coiled-coil domain containing 37 (ccdc37), mRNA	0.984	0.399	0	0	0.0525	0	0.328	0	0	0	0.1	0	0	0	0	0	0	0	0.1845	0	0	0.554333
gi|115529406|ref|NM_001076763.1| Danio rerio zgc:153989 (zgc:153989), mRNA	2.27	2.634	0.92725	2.094	1.661	1.237	1.719	1.459	1.014	1.408	0.251	0	0.83	1.199	0	0.678	0.448	0	2.667	1.156	1.2985	0.695
gi|115529408|ref|NM_001076764.1| Danio rerio zgc:153384 (zgc:153384), mRNA	78.575	46.56	35.1502	21.958	65.652	39.5538	40.509	54.288	32.149	46.714	26.66	53.117	23.809	36.045	33.611	36.575	32.586	16.08	60.233	52.582	20.9685	2.54133
gi|115529410|ref|NM_001076765.1| Danio rerio zgc:153057 (zgc:153057), mRNA	0	0.18	0.16475	0	0.1165	0.26575	0.345	0.174	0.081	0.092	0.628	0	0	0.229	0.154	0.485	0.08	0	0.1835	0.1075	0.1985	0.0126667
gi|115529414|ref|NM_001076768.1| Danio rerio leucine rich transmembrane and 0-methyltransferase domain containing (lrtomt), mRNA	0	0.191	0	0	0	0	0.105	0	0	0	0.762	0.245	0	0.365	0.326	0.343	0.171	0.169	0	0	0	1.26433
gi|115529416|ref|NM_001076769.1| Danio rerio zgc:153625 (zgc:153625), mRNA	8.437	3.101	0.62125	1.0275	6.446	0.83675	4.773	4.625	1.071	7.666	7.031	3.673	7.502	6.918	0	9.019	5.011	0.106	6.3625	0	1.4945	0.354667
gi|115529418|ref|NM_001076770.1| Danio rerio zgc:153063 (zgc:153063), mRNA	0	0	0.065	0	0	0	0	0	0	0	0	0.378	0.244	0.188	0	0.265	0	0	0.1695	0	0	0
gi|115529420|ref|NM_001076771.1| Danio rerio von Willebrand factor D and EGF domains (vwde), mRNA	13.121	3.754	0.9485	0	2.556	0.687	2.572	0.91	1.264	0.957	2.344	0	0	0.598	0	0	1.468	3.956	24.0725	6.7655	0.157	0.115
gi|115529422|ref|NM_001076772.1| Danio rerio Kruppel-like factor 13 (klf13), mRNA	1.723	9.671	4.06	2.3535	4.149	4.55475	8.525	12.03	5.356	10.112	9.581	0.931	9.337	4.006	4.823	3.337	11.381	10.728	2.946	1.8785	4.9155	0.812
gi|115529424|ref|NM_001076773.1| Danio rerio zgc:153264 (zgc:153264), mRNA	0	0	0	0	0	0	0	0	0	0	0	0	0	0	0	0	0	0	0	0	0	0
gi|115529426|ref|NM_001076766.1| Danio rerio zgc:153169 (zgc:153169), mRNA	7.483	31.97	23.0922	13.9375	23.304	5.503	37.472	24.499	11.802	24.622	22.473	3.729	2.928	4.913	11.236	8.645	12.424	11.775	14.9025	3.0275	37.5675	3.16933
gi|115529428|ref|NM_001076774.1| Danio rerio zgc:153739 (zgc:153739), mRNA	1.033	1.435	0.31825	0.3865	0.6065	0.50075	1.672	0.522	0.322	1.647	0.269	0.23	0	0	0	0	0.481	1.433	1.921	0.9485	2.2745	1.24133
gi|115529430|ref|NM_001076775.1| Danio rerio trafficking protein particle complex 2 (trappc2), mRNA	0.29	0.969	0.58725	0.3035	1.647	0.46675	1.641	2.561	0.474	2.964	1.848	1.243	3.644	3.592	2.409	2.378	1.023	2.735	2.0885	0.167	1.3745	5.444
gi|115529434|ref|NM_001076777.1| Danio rerio zgc:153067 (zgc:153067), mRNA	0.258	0	0.077	0	0	0	0	0	0	0	0	0	0	0	0	0	0.56	0.556	0	0	0	0.0113333
gi|115749601|ref|NM_001076712.1| Danio rerio biorientation of chromosomes in cell division 1 (bod1), mRNA	0.956	2.326	0.1785	0.167	1.5555	0.18375	3.081	2.255	0.87	4.943	1.356	2.487	0.642	2.347	0.994	3.838	0.346	1.376	1.7635	1.5025	0.6875	12.5007
gi|116004492|ref|NM_001077140.1| Danio rerio zgc:153349 (zgc:153349), mRNA	0	0	0	0	0	0	0	0	0	0	0	0.587	0	0	0	0	0	0	0	0	0	1.82333
gi|116004496|ref|NM_001077142.1| Danio rerio zgc:154055 (zgc:154055), mRNA	0	0.601	0.70925	0.553	0.8055	0.824	1.836	0.999	0.309	1.49	1.373	1.322	12.51	16.149	27.759	34.793	1.152	0.076	0.4715	1.285	2.5525	0.413
gi|116004500|ref|NM_001077143.1| Danio rerio 5'-nucleotidase domain containing 2 (nt5dc2), mRNA	6.837	34.492	45.264	11.303	59.0795	19.4677	43.409	99.813	22.855	31.765	63.75	18.338	74.349	36.114	26.685	48.445	21.053	42.001	24.227	26.0485	36.5515	4.57467
gi|116004502|ref|NM_001077141.1| Danio rerio transcriptional adaptor 2A (tada2a), mRNA	9.897	8.494	7.36575	4.558	19.1725	7.18275	12.61	14.181	6.569	14.443	13.084	3.784	5.272	9.475	10.894	7.859	4.534	15.287	24.0975	2.929	26.766	1.13033
gi|116004504|ref|NM_001077145.1| Danio rerio Bardet-Biedl syndrome 7 (bbs7), mRNA	2.164	2.786	4.78675	2.1265	2.675	3.544	5.557	4.951	3.266	3.552	2.629	0	1.153	0.493	0.265	0.279	1.176	4.395	2.868	0.5285	5.002	2.79633
gi|116004506|ref|NM_001077144.1| Danio rerio transmembrane protein 88 b (tmem88b), mRNA	6.21	13.528	3.911	2.9035	12.745	4.26775	17.072	7.624	10.454	19.096	5.501	0	0.26	0.1	0	2.266	2.531	5.026	20.3235	1.9865	10.2775	0.679667
gi|116004508|ref|NM_001077148.1| Danio rerio zgc:153279 (zgc:153279), mRNA	0	0	0.07425	0	0.487	0.142	0	0	0	0	0.372	0	0	0	0	0	0	0	0	0	0	0.135667
gi|116004510|ref|NM_001077146.1| Danio rerio bone morphogenetic protein 7b (bmp7b), mRNA	4.132	7.177	18.4145	11.0935	21.566	32.6643	10.032	6.957	10.205	9.64	8.366	7.827	18.017	14.181	8.386	19.813	3.635	2.972	54.966	7.5345	14.9835	0.563
gi|116004512|ref|NM_001077150.1| Danio rerio 3-oxoacid CoA transferase 1b (oxct1b), mRNA	0	0	0.02225	0	0	0	0.117	0	0.288	0.109	0.534	0	0	0.068	0	0	0.096	0.759	1.0135	5.0065	0.236	2.825
gi|116004514|ref|NM_001077147.1| Danio rerio zgc:153606 (zgc:153606), mRNA	0.237	0.863	0.7045	0.5545	0.333	0.329	0.631	0	0.387	1.614	0.287	0	2.142	1.742	1.475	1.553	0.386	0.128	0.8265	0.039	0.602	1.32967
gi|116004516|ref|NM_001077153.1| Danio rerio zinc finger protein 36, C3H type-like 1a (zfp36l1a), mRNA	10.749	11.74	12.5533	9.74	15.9305	5.546	15.602	14.816	4.376	16.948	25.562	29.558	94.223	45.39	45.831	64.606	12.374	9.731	23.9225	5.481	20.6065	7.07367
gi|116004520|ref|NM_001077154.1| Danio rerio coagulation factor XIII, A1 polypeptide (f13a1), mRNA	1.572	1.912	0.684	0	0	0.19775	0.218	0.154	0.072	0.325	0.478	21.871	0	0	0	0.86	0.214	0	3.9315	3.2385	0.6665	2.968
gi|116004522|ref|NM_001077151.1| Danio rerio potassium channel tetramerisation domain containing 13 (kctd13), mRNA	0	0.59	0.0205	0.464	0.2305	0.074	0.269	1.334	0.177	0.702	0.786	0.252	1.627	0.94	2.017	0.885	1.581	2.355	0.59	0.7995	0.7375	1.31933
gi|116004524|ref|NM_001077156.1| Danio rerio zgc:153368 (zgc:153368), mRNA	10.769	6.235	4.60825	3.5775	4.458	8.4895	7.049	6.8	4.06	6.917	3.27	6.3	3.999	4.968	2.799	3.227	2.02	7.263	6.9245	5.0315	5.1625	4.71167
gi|116004526|ref|NM_001077152.1| Danio rerio GA repeat binding protein, beta 2b (gabpb2b), mRNA	0.244	0.297	0	0	0	0.03525	0	0	0	0.152	0	0.572	0	0.189	0	0	0	0.264	0	0	0.1295	0.195333
gi|116004528|ref|NM_001077157.1| Danio rerio arylsulfatase family, member K (arsk), mRNA	0.982	1.194	0.38275	0	0.645	0.1885	0.545	0.964	0.179	0.913	0.497	0	0	0.507	1.361	0.358	0.089	0.088	0.3875	0	0.5695	0.0763333
gi|116004530|ref|NM_001077155.1| Danio rerio zgc:153218 (zgc:153218), mRNA	0.582	0	0.199	0.203	0.3055	0.4535	0.581	0	0.106	0.12	0.471	0.907	0	0.3	0	0.849	0.527	2.719	0.6695	0	0.4965	2.381
gi|116004532|ref|NM_001077160.1| Danio rerio zgc:152954 (zgc:152954), mRNA	1.717	0.803	2.009	1.69	1.5445	1.857	1.453	1.246	1.298	1.638	0.562	1.133	1.861	1.382	3.021	1.301	6.388	1.354	0.882	2.4855	1.466	4.83633
gi|116004536|ref|NM_001077163.1| Danio rerio creatine kinase, brain a (ckba), mRNA	34.129	6.684	5.568	4.301	12.881	12.033	11.525	9.719	4.627	16.052	11.686	19.474	15.442	22.809	30.478	20.557	39.952	15.077	50.587	47.861	13.227	12.2703
gi|116004542|ref|NM_001077161.1| Danio rerio zinc finger protein 438 (zfp438), mRNA	0	0.411	0.602	0.988	0.1065	0.90925	0.27	0	0.812	0.252	0.328	0.316	0.136	0.262	0.703	0.296	0.22	0.292	1.572	1.3675	1.5275	1.03333
gi|116004544|ref|NM_001077162.1| Danio rerio zgc:152874 (zgc:152874), mRNA	0.162	0	0.1075	0	0.5105	0.206	0.324	0.764	0.354	0.804	0.689	0	0	0.314	0.505	1.064	2.201	0.087	0.3365	0.2775	0.627	5.23667
gi|116004546|ref|NM_001077165.1| Danio rerio zgc:153043 (zgc:153043), mRNA	0	0	0	0	0	0.079	0	0	0	0	0	0	0	0	0	0	0	0	0	0	0.158	0.315667
gi|116004548|ref|NM_001077166.1| Danio rerio zgc:153153 (zgc:153153), mRNA	0.927	0.644	0.31075	0.3105	1.5285	0.12575	0.662	0.468	0.217	0.246	0.322	1.446	1.2	0.359	1.239	0.58	0.216	0	0.2725	0	0.5875	1.19867
gi|116004554|ref|NM_001077169.1| Danio rerio zgc:153654 (zgc:153654), mRNA	0	0	0.30225	0.0815	0	0.0635	0	0	0	0.097	0	0	0	0.06	0	0	0	0	0	0	0	0.331
gi|116004558|ref|NM_001077170.1| Danio rerio zgc:152930 (zgc:152930), mRNA	0.302	0.092	0.08125	0	0.264	0.1605	0.958	0.178	0.248	0.188	0	1.652	0	0	0	0.331	0	0	2.838	0.713	0.123	3.81633
gi|116004560|ref|NM_001077173.1| Danio rerio syntabulin (syntaxin-interacting) (sybu), mRNA	0	0	0	0	0	0.04	0.085	0	0	0.714	0	0.1	0.129	0	0	0.14	2.155	1.656	0.161	0	0.068	20.1917
gi|116004564|ref|NM_001077175.1| Danio rerio zgc:152897 (zgc:152897), mRNA	0.169	0	0	0	0.027	0	0	0	0.046	0.105	0	0.264	0	0	0	0	0	0	0.5315	0	0	1.38533
gi|116004566|ref|NM_001077174.1| Danio rerio zgc:153537 (zgc:153537), mRNA	0.298	0.452	0.1375	0.3115	0.07	0.043	0.397	0	0.244	0	0.361	0.116	0.599	0.288	1.701	0.163	0	0.161	0.1445	0.049	0.218	3.86933
gi|116004568|ref|NM_001077176.1| Danio rerio zgc:152951 (zgc:152951), mRNA	0	0	0.036	0.1085	0	0.11375	0.069	0	0.226	0	0	0	0	0	0	0	0	0.223	0	1.479	0	3.075
gi|116004570|ref|NM_001077178.1| Danio rerio kinesin light chain 3 (klc3), mRNA	1.54	0	0.15425	0.3115	0	0.10725	0.171	0	0	0.106	0	0	0.172	0	0	0	0	0	0	0	0	0.440667
gi|116004574|ref|NM_001077179.1| Danio rerio zgc:153329 (zgc:153329), mRNA	0.525	5.267	10.7658	36.886	13.755	3.9335	16.448	29.398	11.897	14.818	80.933	0.819	3.567	1.272	2.32	2.586	8.988	23.657	5.32	0.6055	48.301	3.63067
gi|116174727|ref|NM_001077212.1| Danio rerio dynactin 1a (dctn1a), mRNA	3.104	2.318	4.40025	4.602	8.2375	16.7192	2.601	5.749	4.842	3.685	4.525	2.006	3.034	1.718	1.106	4.271	1.253	2.01	3.9225	1.362	1.403	1.95367
gi|116175236|ref|NM_198800.2| Danio rerio natriuretic peptide precursor A (nppa), mRNA	0.372	0	0	0	0.4685	0.26825	0	0	0	0	0	0	0	0	0	0	0	0	0	0	0	0.235667
gi|116175239|ref|NM_001025487.2| Danio rerio si:dkeyp-89c11.3 (si:dkeyp-89c11.3), mRNA	0.651	0.594	0.64425	2.209	0.5405	0.68775	0.977	1.344	0.445	3.333	3.462	0	0.819	0.947	0.169	0.713	1.239	1.318	1.7575	0	2.185	1.637
gi|116175241|ref|NM_001025504.2| Danio rerio prostaglandin-endoperoxide synthase 2b (ptgs2b), mRNA	0.669	1.302	0.41675	0.14	0.3165	0.126	0.714	0.158	0.512	0.581	1.708	0.209	1.078	0.83	0.974	0.879	0.873	1.156	0.8755	0.9265	1.6305	0.321
gi|116175242|ref|NM_001034977.2| Danio rerio phosphatidylinositol 4-kinase, catalytic, beta (pi4kb), mRNA	3.516	3.062	4.46625	2.5305	5.0885	3.9725	4.75	6.384	2.075	5.304	3.347	1.927	2.773	3.682	1.185	2.704	1.549	2.307	6.327	1.068	3.445	1.72833
gi|116175244|ref|NM_001044834.2| Danio rerio si:dkey-239i20.4 (si:dkey-239i20.4), mRNA	0	0.573	0.09975	0.276	0	0.024	0.707	0.834	0	0.585	0.286	0	0.356	0.457	0.245	0	0.384	0.064	0.016	0	0.1895	0.813667
gi|116175246|ref|NM_001039358.2| Danio rerio histone deacetylase 4 (hdac4), mRNA	0.759	0.615	1.53675	0.572	0.3595	0.655	0.759	0.994	0.599	1.465	1.025	0.066	0.509	0.588	0.964	0.462	0.642	2.002	0.506	0.678	1.6385	0.158667
gi|116235415|ref|NM_001077247.1| Danio rerio si:dkey-180p18.9 (si:dkey-180p18.9), mRNA	0.206	0.376	0.18075	0	0.519	0.14875	1.375	0.243	0.225	3.455	1.003	0.161	0.415	1.679	3.217	6.098	2.915	2.338	1.2375	2.271	2.312	11.137
gi|116235417|ref|NM_001077248.1| Danio rerio solute carrier family 27 (fatty acid transporter), member 1b (slc27a1b), mRNA	1.358	2.807	6.22225	4.1785	2.7905	3.174	5.566	2.401	3.114	6.232	2.31	0.318	0.137	0.158	0.282	0	1.845	2.271	5.163	3.0475	6.685	1.439
gi|116235419|ref|NM_001077250.1| Danio rerio zgc:153795 (zgc:153795), mRNA	5.444	1.862	0.18925	0	0	0	2.948	0.602	0.093	1.266	0.103	0.133	0	5.273	6.367	0	2.773	7.71	0.2345	1.8105	0.045	18.207
gi|116235423|ref|NM_001077254.1| Danio rerio sarcolemma associated protein a (slmapa), mRNA	9.874	8.942	13.4147	4.429	10.297	12.4405	10.625	8.365	4.212	9.25	4.311	5.857	5.071	8.21	7.164	8.781	4.359	10.932	16.954	13.842	8.9055	5.48133
gi|116235425|ref|NM_001077251.1| Danio rerio olfactomedin-like 3b (olfml3b), mRNA	1.309	0.53	0.2515	0.2285	0.139	0	1.163	0	0	0	0	0	0	0.085	4.536	0.239	0.711	0.118	4.0725	3.199	1.057	1.147
gi|116235429|ref|NM_001077253.1| Danio rerio guanine nucleotide binding protein-like 1 (gnl1), mRNA	0.17	0.103	0.324	0.1775	0.3215	0.30775	1.3	1.199	0.185	1.473	2.163	2.117	0.341	0.92	1.939	1.485	0.461	0.092	0.711	0.5085	0.225	1.707
gi|116235431|ref|NM_001077258.1| Danio rerio zgc:153347 (zgc:153347), mRNA	0.587	1.19	0.6435	0.869	1.2375	1.67825	1.435	0.692	0.748	1.7	1.07	0	0.591	0.531	0.407	0.857	0.213	0.106	1.227	2.58	0.9725	2.227
gi|116235433|ref|NM_001077255.1| Danio rerio CCR4-NOT transcription complex, subunit 7 (cnot7), mRNA	0	0.904	0.413	0.2335	0.165	0.3	0.842	1.052	1.137	0.83	0.994	0.928	0.898	0.864	0.618	1.628	0.242	0.562	0.225	0.0735	0.9595	3.86967
gi|116235437|ref|NM_001077256.1| Danio rerio ring finger protein 32 (rnf32), mRNA	0	0.478	0	0	0	0.12875	1.135	0.309	0.143	0.487	0	0.409	0	0.812	1.362	0.287	0.854	0.565	0	0	0	0.214667
gi|116267932|ref|NM_001077270.1| Danio rerio integrator complex subunit 9 (ints9), mRNA	11.707	3.427	2.3325	2.2235	5.801	4.30275	4.864	5.451	2.604	5.468	2.985	3.72	4.654	6.328	1.653	5.22	1.257	2.495	10.8165	3.02	5.452	1.48067
gi|116267934|ref|NM_001077271.1| Danio rerio zgc:153990 (zgc:153990), mRNA	1.442	0.558	1.66	0.1375	0.91	0.3525	0.961	0.618	0.573	1.139	1.195	0.205	0.132	0.559	0	0.574	0.57	1.273	0.308	3.483	1.671	5.47333
gi|116267936|ref|NM_001077272.1| Danio rerio nuclear receptor subfamily 5, group A, member 5 (nr5a5), transcript variant 2, mRNA	0.489	0.297	0.20825	0.297	0	0.07475	0.38	0	0	0.303	0.099	1.144	0.492	0.821	0.169	0.714	1.151	0.44	0	0	0.262	1.63267
gi|116267938|ref|NM_001077274.1| Danio rerio zgc:153129 (zgc:153129), mRNA	0	1.346	0.07875	0.193	0.059	0.95125	0.615	1.739	0.101	0.114	0.448	0.432	0.186	0.715	1.151	1.211	0.301	1.194	0.229	0.1945	0	14.6267
gi|116267940|ref|NM_001077273.1| Danio rerio zgc:154141 (zgc:154141), mRNA	0	0	0	0	0	0	0	0	0	0	0	0	0	0.264	0	0	0	0	0	0	0	0
gi|116267942|ref|NM_001077275.1| Danio rerio zgc:153119 (zgc:153119), mRNA	0	0	0	0	0	0	0.163	0	0	0.152	0	0	0.246	0.19	0	0	0	0.264	0	0	0	0.0106667
gi|116267946|ref|NM_001077276.1| Danio rerio high mobility group AT-hook 1b (hmga1b), mRNA	2.721	18.728	7.333	9.1415	11.6245	8.164	17.285	54.413	4.552	24.658	48.139	4.724	14.042	12.107	13.412	13.641	11.112	20.504	10.9045	4.6045	24.87	4.321
gi|116267950|ref|NM_001077279.1| Danio rerio enhancer of zeste homolog 2 (Drosophila) (ezh2), mRNA	18.41	13.99	11.3027	10.196	16.0985	3.97325	13.953	19.358	7.834	8.395	11.675	4.857	9.444	10.28	10.413	9.877	8.532	7.498	17.7035	8.6715	11.0765	11.2553
gi|116267952|ref|NM_001077281.1| Danio rerio zgc:153341 (zgc:153341), mRNA	0	0.205	0	0	0.0795	0	0.394	0.199	0.277	0.105	0.205	0	0	0.262	0.176	0.185	0.184	0.365	0	0	0	1.41033
gi|116267954|ref|NM_001077280.1| Danio rerio si:dkey-184p18.2 (si:dkey-184p18.2), mRNA	0	0.093	0	0	0	0.0625	0.102	0	0	0	0	0	0	0	0	0	0	0	0	1.734	0	3.48733
gi|116267956|ref|NM_001077282.1| Danio rerio zgc:154043 (zgc:154043), mRNA	3.926	2.457	1.30125	0.452	1.458	2.69525	2.886	1.089	0.567	1.79	4.979	0.09	0.232	0.492	0.6	0	6.023	1.308	6.541	3.1275	1.1265	0.147667
gi|116267958|ref|NM_001077283.1| Danio rerio zgc:154089 (zgc:154089), mRNA	0.895	0.272	0.27325	0.543	0.6355	0.3505	1.342	1.407	0.081	1.758	1.54	0.233	0	0.405	0	1.306	0.162	0.08	1.285	0.8255	0.258	1.58
gi|116267960|ref|NM_001077284.1| Danio rerio zgc:153776 (zgc:153776), mRNA	0	0.137	0	0	0	0	0	0	0	0	0	0	0	0	0.234	0	0	0.243	0	0	0	0.0973333
gi|116267962|ref|NM_001077285.1| Danio rerio zgc:153910 (zgc:153910), mRNA	1.205	2.686	0.1075	0.2105	0.509	0.4005	0.87	3.077	0.768	0.996	0.366	2.977	1.819	0.545	0	1.319	0.218	0	1.224	0	0	15.7253
gi|116267964|ref|NM_001077286.1| Danio rerio suppressor of cytokine signaling 5a (socs5a), transcript variant 2, mRNA	0	0	0.01075	0	0.1355	0	0.041	0	0	0	0.074	0	0	0	0	0	0	0.595	0.05	0	0	0.0136667
gi|116267970|ref|NM_001077288.1| Danio rerio zgc:152938 (zgc:152938), mRNA	0	0.391	0.3495	0.084	0	0.101	0.482	0.379	0.527	0.399	0.098	0.125	0.162	0.062	2.006	0.176	0.612	3.211	0.203	0	0.455	3.466
gi|116267972|ref|NM_001077290.1| Danio rerio KH domain containing, RNA binding, signal transduction associated 2 (khdrbs2), mRNA	0	0	0	0	0.131	0	0.332	0	0	0.206	0.101	0	0	0.45	0.863	0	0.271	0.269	0	0	0.132	0.105
gi|116267976|ref|NM_001077292.1| Danio rerio zgc:153652 (zgc:153652), mRNA	0.441	1.34	0.174	1.1485	0.6245	0.33075	1.396	1.299	0.361	0.683	0.803	0	0.444	0.854	1.146	0.241	0	0.476	0.3975	0	0.655	1.286
gi|116267978|ref|NM_001077293.1| Danio rerio zgc:153642 (zgc:153642), mRNA	0	0	0	0	0	0	0	0	0	0	0	0	0	0	0	0	0	0	0	0	0	0.985667
gi|116267980|ref|NM_001077294.1| Danio rerio zgc:153628 (zgc:153628), mRNA	5.211	0	0.07975	0	0.0535	0	0.28	0	0.184	0.313	0.408	0	0.677	0.326	0.699	1.84	0.913	1.088	1.8465	0.9915	0.383	1.614
gi|116267982|ref|NM_001077295.1| Danio rerio zgc:153687 (zgc:153687), mRNA	6.345	8.743	0.708	2.099	6.81	1.57425	8.739	16.451	2.771	4.722	5.652	4.619	3.405	3.278	12.751	8.333	0.689	0.228	5.336	2.885	0.9645	10.111
gi|116267984|ref|NM_001077296.1| Danio rerio zgc:153351 (zgc:153351), mRNA	0.862	0.349	0.239	0	0.609	0.3275	0.383	0.339	0.47	0.713	1.308	0	0.145	0.501	0.149	0.314	0.234	0.62	1.182	0.142	0.8045	6.80733
gi|116267986|ref|NM_001077297.1| Danio rerio cryptochrome 1a (cry1a), transcript variant 1, mRNA	0.826	1.65	1.0745	0.247	2.309	0.418	4.01	3.755	0.322	8.708	4.73	0.92	1.069	4.389	6.501	8.911	4.68	5.793	4.779	1.59	3.462	1.78133
gi|116267988|ref|NM_001077298.1| Danio rerio zgc:154073 (zgc:154073), mRNA	1.842	0.448	0.98975	3.2195	3.1415	6.081	2.148	0.868	1.005	0.799	0.447	0.862	0.556	1.284	0.766	1.411	2.101	2.583	2.413	4.4055	1.2335	0.89
gi|116267990|ref|NM_001077299.1| Danio rerio zgc:153746 (zgc:153746), mRNA	2.866	3.92	2.1765	0.938	2.8235	2.35425	4.536	2.955	4.107	4.887	10.879	10.059	1.802	3.331	3.724	6.273	2.92	5.605	6.298	0.7315	4.837	0.0386667
gi|116267992|ref|NM_001077300.1| Danio rerio complexin 4a (cplx4a), mRNA	1.462	0.444	0.6235	0.725	1.906	0.3135	1.51	0.345	1.516	0.816	2.308	0.342	1.912	0.623	0.76	1.12	0.953	4.1	2	0.26	2.767	3.16733
gi|116267994|ref|NM_001077301.1| Danio rerio peptidase M20 domain containing 1, tandem duplicate 2 (pm20d1.2), mRNA	0	0.105	0.09825	0.2935	0.0825	0.23275	0.49	0	0.189	0.268	0.525	0	0	0.033	0	0	0.047	0	0.2765	0	0.1495	1.03333
gi|116267998|ref|NM_001077303.1| Danio rerio zgc:154176 (zgc:154176), mRNA	4.814	7.393	5.944	1.257	5.2055	7.57725	9.286	6.569	2.766	11.784	18.311	3.162	2.039	5.988	5.794	8.041	11.426	16.539	12.572	6.587	12.8015	1.78367
gi|116268000|ref|NM_001077304.1| Danio rerio zgc:153041 (zgc:153041), mRNA	4.607	8.195	8.69775	6.1445	12.0965	7.9635	12.168	16.29	8.757	9.313	6.84	12.245	5.323	14.48	8.514	7.471	4.172	2.209	18.058	7.8775	2.703	1.64
gi|116268002|ref|NM_001077305.1| Danio rerio zgc:153522 (zgc:153522), mRNA	0	0	0	0	0	0	0	0	0	0	0	0	0	0	0	0	0	0	0	0	0	0.934667
gi|116268004|ref|NM_001077306.1| Danio rerio chromatin target of PRMT1b (chtopb), mRNA	0	3.59	0.05475	0	0	0	3.053	0.96	0	1.894	0	0.794	0	4.339	6.35	0.223	0.664	2.637	0	0	0	3.48133
gi|116268006|ref|NM_001077307.1| Danio rerio regulator of G-protein signaling 18 (rgs18), mRNA	0	0.12	0	0	0	0	0.131	0.232	0	0.122	0.12	0	0	0.076	0	0	0.107	0	0	0	0	0.835333
gi|116268008|ref|NM_001077308.1| Danio rerio zgc:153505 (zgc:153505), mRNA	0	1.579	0.75725	0.881	0.736	0.32825	2.424	0.306	0.709	4.188	3.471	3.444	2.352	1.409	2.16	5.402	2.117	3.363	1.946	0.719	2.1165	0.349667
gi|116268012|ref|NM_001077310.1| Danio rerio zgc:153102 (zgc:153102), mRNA	0	0	0	0	0	0	0	0	0	0	0	0	0.532	0	0	0	0	0	0	0	0	0.0966667
gi|116268014|ref|NM_001077311.1| Danio rerio zgc:152986 (zgc:152986), mRNA	0	0.178	0	0	0	0	0.098	0	0	0	0	0	0	0	0.304	0.32	0	0	0.04	0	0.0775	12.8543
gi|116268018|ref|NM_001077314.1| Danio rerio down-regulator of transcription 1 (dr1), mRNA	0.155	4.612	0.17875	0	0.2205	0.1865	2.992	1.642	4.564	1.632	3.197	0	1.869	2.58	3.219	1.525	10.18	8.854	0.625	0	1.2425	10.048
gi|116268022|ref|NM_001077315.1| Danio rerio zgc:153911 (zgc:153911), mRNA	6.636	0.367	0.3765	0	0	0	0.536	0	0.22	0.249	0.366	0.157	0	0.078	0	0	0	0	0.5815	0.848	0	1.15233
gi|116268024|ref|NM_001077316.1| Danio rerio zgc:153051 (zgc:153051), mRNA	0.204	0.373	0	0.693	2.8105	0.81975	0.681	2.409	0.558	1.648	2.731	0	2.467	0.95	0.85	1.342	3.553	0	1.4515	0.916	2.1095	0.891667
gi|116268026|ref|NM_001077317.1| Danio rerio zgc:153049 (zgc:153049), mRNA	0	0	0	0	0	0	0.093	0	0	0	0	0	0	0	0	0	0	0	0	0.3415	0	0.815
gi|116268028|ref|NM_001077319.1| Danio rerio zgc:152997 (zgc:152997), mRNA	0	1.228	0.2915	0	0	0.142	1.826	1.36	0.472	1.252	0.701	0.225	0.58	0.782	0.9	1.894	2.508	2.023	0.571	0.6745	0.306	2.145
gi|116268030|ref|NM_001077318.1| Danio rerio zgc:153764 (zgc:153764), mRNA	2.642	1.022	1.42375	1.003	1.4575	2.6655	2.761	3.821	0.656	4.617	2.48	2.623	0.483	3.397	2.372	3.154	1.24	4.859	4.328	2.8135	2.543	0.486
gi|116268032|ref|NM_001077320.1| Danio rerio DEP domain containing MTOR-interacting protein (deptor), mRNA	0.127	0.077	0	0.2305	1.0995	0.073	0.253	0.746	0.138	0.942	0.999	0	0.127	0.049	0	0.139	0.206	0.546	0.3635	0.292	0.2035	3.32167
gi|116268034|ref|NM_001077321.1| Danio rerio zgc:153288 (zgc:153288), mRNA	6.096	0.371	0.49725	0.437	1.038	0.47525	0.102	0	0.25	0.473	0.37	0	0	0.059	0	0	0.248	0.164	2.4135	0.698	1.266	0.0606667
gi|116268036|ref|NM_001077322.1| Danio rerio zgc:153675 (zgc:153675), mRNA	40.525	27.128	6.8375	4.9845	35.843	17.0465	25.642	35.42	17.898	13.272	13.552	6.393	12.828	9.351	7.1	14.453	8.165	11.792	33.5105	3.331	18.8825	4.708
gi|116268038|ref|NM_001077323.1| Danio rerio zgc:154001 (zgc:154001), mRNA	9.172	7.488	11.7975	7.113	8.3615	20.6762	9.387	13.744	6.438	15.033	11.699	6.643	7.778	9.088	9.807	12.333	4.841	6.716	45.843	6.7615	31.3365	5.84933
gi|116268040|ref|NM_001077326.1| Danio rerio gamma-aminobutyric acid (GABA) A receptor, alpha 1 (gabra1), mRNA	0	0	0	0	0	0	0.339	0	0	0	0	0	0	0	0.151	0	0.079	0.235	0	0	0	0.0223333
gi|116268042|ref|NM_001077327.1| Danio rerio zgc:154086 (zgc:154086), mRNA	1.037	0	0	0	0	0.043	0.031	0.111	0	0.234	0.172	0	0	0.037	0	0	0	0	0.2505	0	0.315	3.651
gi|116268044|ref|NM_001077324.1| Danio rerio zgc:153920 (zgc:153920), mRNA	0	0	0	0	0	0	0	0	0	0	0	0	0	0	0	0	0	0	0	0	0	0.705333
gi|116268046|ref|NM_001077325.1| Danio rerio zgc:153607 (zgc:153607), mRNA	12.868	5.867	3.80375	3.873	4.112	5.36	4.169	9.479	2.244	4.323	4.017	4.461	12.409	7.964	8.175	6.455	21.074	2.604	7.305	9.0405	1.529	3.73667
gi|116268048|ref|NM_001077329.1| Danio rerio zgc:153115 (zgc:153115), mRNA	1.272	0.58	0.2885	0	0.9005	0.337	0.106	0.375	0	1.183	0.386	1.736	0.96	0.246	0	0.348	0	0.172	1.678	2.4095	0.298	1.691
gi|116268050|ref|NM_001077330.1| Danio rerio zgc:153420 (zgc:153420), mRNA	18.092	5.499	6.1635	1.6095	15.2685	9.46675	6.029	5.331	4.265	5.865	1.498	8.018	1.655	5.098	3.42	8.101	4.469	5.324	12.4725	7.899	5.015	2.50033
gi|116268054|ref|NM_001077331.1| Danio rerio zgc:154125 (zgc:154125), mRNA	0	0.127	0	0.3815	0.0985	0.096	0.419	0	0	0.26	0	0	0	0.081	0	0	0	0.452	0.0285	0.615	0.0855	0
gi|116268056|ref|NM_001077332.1| Danio rerio zgc:153386 (zgc:153386), nuclear gene encoding mitochondrial protein, mRNA	3.366	1.938	0.1845	0.8305	0.9505	0.344	2.125	3.341	0.677	0.549	0.968	0.415	3.03	4.805	2.394	3.684	1.155	4.97	3.2455	2.2005	1.259	4.76667
gi|116268058|ref|NM_001077335.1| Danio rerio zgc:153092 (zgc:153092), mRNA	0	0.136	0	0	0	0	0.075	0	0	0	0	0	0	0.087	0	0	0	0.121	0	0	0	1.99767
gi|116268060|ref|NM_001077333.1| Danio rerio carbonic anhydrase XV c (ca15c), mRNA	0	0	0	0	0	0	0	0	0	0	0	0	0	0	0.206	0	0	0.107	0	0	0	0.5
gi|116268062|ref|NM_001077334.1| Danio rerio zgc:153035 (zgc:153035), mRNA	0	5.568	1.2385	0.6335	4.6925	1.737	8.968	9.693	4.388	8.577	23.84	4.082	11.472	8.835	9.714	15.956	4.265	20.571	5.481	1.4595	11.7605	1.242
gi|116268064|ref|NM_001077336.1| Danio rerio zgc:153257 (zgc:153257), mRNA	0.367	0.669	0.38675	0.622	2.4395	1.0465	0.306	1.729	0.4	0.796	0.445	0.715	1.107	0	0	0	0.1	2.869	0.4595	0	0.9595	1.00867
gi|116268066|ref|NM_001077337.1| Danio rerio zgc:153024 (zgc:153024), mRNA	0	0	0	0	0	0	0	0	0	0	0.12	0	0	0	0	0	0	0	0	0	0	6.41733
gi|116268068|ref|NM_001077339.1| Danio rerio zgc:153142 (zgc:153142), mRNA	0.159	0.771	0.60125	0.166	0	0.03225	0	0.374	0.519	0.098	0	0	0.319	0.061	0	0	0.345	1.283	0	0	0.129	0
gi|116268072|ref|NM_001077341.1| Danio rerio zgc:153943 (zgc:153943), mRNA	3.148	1.017	0.06375	0.3335	0.4505	0.1635	0.885	1.507	1.934	0.427	3.824	0.23	0.099	0.724	1.125	1.292	0.321	1.009	0.384	0.126	1.2735	3.79067
gi|116268074|ref|NM_001077340.1| Danio rerio kelch-like 24 (Drosophila) (klhl24), mRNA	2.227	1.805	1.36825	3.4835	2.2785	4.668	2.869	2.975	2.837	3.959	5.23	0	1.195	1.783	0.154	1.462	0.726	1.602	9.5595	1.644	8.2135	0.675333
gi|116268076|ref|NM_001077342.1| Danio rerio zgc:153060 (zgc:153060), mRNA	8.338	14.095	22.3712	23.987	24.2865	9.0995	18.975	32.599	33.753	9.081	14.576	9.201	33.151	37.746	13.742	14.469	12.266	8.229	13.6285	3.545	7.528	1.49367
gi|116268078|ref|NM_001077343.1| Danio rerio ubiquitin specific peptidase 37 (usp37), mRNA	4.502	1.155	0.4815	0.783	1.6915	0.97725	1.067	1.297	0.819	1.675	0.365	2.107	0.705	0.775	2.288	1.314	0.707	0.971	2.029	0.821	0.656	9.92333
gi|116268080|ref|NM_001077344.1| Danio rerio 3-phosphoinositide dependent protein kinase-1a (pdpk1a), mRNA	0	0.257	0.28775	0.074	0.045	0.02025	0.423	0.499	0.154	0.788	1.372	0	0.568	0.273	0.44	0.464	0.307	0.381	0.0575	0	0.6265	0.812667
gi|116268082|ref|NM_001077347.1| Danio rerio zgc:153987 (zgc:153987), mRNA	0.18	0	0.2775	0.0945	0	0.0825	0.18	0.425	0.098	0.112	0.328	0	1.45	2.722	2.06	4.338	0.196	0.68	0	0	0.0735	0.784333
gi|116325974|ref|NM_001077355.1| Danio rerio ATP synthase, H+ transporting, mitochondrial F1 complex, alpha subunit 1, cardiac muscle (atp5a1), nuclear gene encoding mitochondrial protein, mRNA	3442.36	1372.23	2066.45	3392.44	2144.24	5027.07	1585.26	1333.3	1395.41	1396.18	667.548	2386.6	2001.39	1730.8	958.471	1425.76	1283.5	613.349	2230.12	1662.35	1151.14	73.888
gi|116487346|ref|NM_001077249.1| Danio rerio tumor protein p53 inducible protein 11b (tp53i11b), mRNA	1.558	0.79	0.98825	0.136	1.8375	1.54675	0.692	0.612	0.425	0.967	0.631	0.405	0.523	0.403	0	0	0.565	0.981	0	0	0.8355	2.72733
gi|116487348|ref|NM_001077252.1| Danio rerio carboxylesterase 2 (intestine, liver) (ces2), mRNA	0	0.116	0.078	0.446	0.15	0.055	0.127	0.449	0	0.236	0.926	0	0	0	0	0	14.179	4.624	2.75	33.033	1.636	12.456
gi|116517237|ref|NM_001077371.1| Danio rerio CTTNBP2 N-terminal like (cttnbp2nl), mRNA	1.837	0.279	0.1015	0.2405	0	0.04425	0.255	0	0.334	0.949	2.696	0	0	0.178	0	0.168	0.083	0.33	0	0	3.2795	0
gi|116517241|ref|NM_001077374.1| Danio rerio core 1 synthase, glycoprotein-N-acetylgalactosamine 3-beta-galactosyltransferase, 1a (c1galt1a), mRNA	0.626	0.888	0.389	1.197	0.0665	0.2	1.6	0	0.57	0.518	0.634	0	0.42	0	0	0	0.454	1.014	3.9985	0.3715	1.3095	2.22967
gi|116517243|ref|NM_001077375.1| Danio rerio tubulin tyrosine ligase-like family, member 11 (ttll11), mRNA	0	0.622	0.07275	0	0	0.02975	0.341	0.172	0	0.454	0.089	0	0	0.17	0	0.32	0.159	0.395	0.2045	0.106	0	0.112
gi|116517245|ref|NM_001077376.1| Danio rerio si:ch211-133n4.4 (si:ch211-133n4.4), mRNA	1.7	8.14	1.4235	55.6235	2.15	3.4945	14.307	15.281	39.686	11.995	8.65	0.995	1.711	2.471	3.756	2.094	1.386	2.523	2.541	0.756	1.311	2.69833
gi|116517247|ref|NM_001077377.1| Danio rerio ankyrin repeat domain 10b (ankrd10b), mRNA	6.363	3.468	6.003	2.1175	5.369	1.3155	6.654	4.655	6.229	4.082	7.197	2.054	3.312	5.271	2.053	4.083	4.173	15.271	3.666	0.0725	5.918	2.62633
gi|116517249|ref|NM_001077378.1| Danio rerio zinc finger, C3HC-type containing 1 (zc3hc1), mRNA	0.459	0.744	0.4505	0.16	0.4565	0.24775	1.581	1.984	0.418	0.854	1.301	1.313	0.308	1.245	1.591	0.502	0.249	1.816	0.76	1.447	0.795	8.875
gi|116517251|ref|NM_001077379.1| Danio rerio SEC23 interacting protein (sec23ip), mRNA	1.796	3.761	0.7525	1.948	1.404	0.736	1.995	2.234	1.253	2.166	1.576	4.436	1.606	1.082	3.215	1.747	0.705	0.646	1.2195	1.21	1.028	5.475
gi|116517253|ref|NM_001077380.1| Danio rerio leucine rich repeat containing 8 family, member Db (lrrc8db), mRNA	0	0	0	0.1175	0.0715	0	0.15	0	0.061	0.209	0.41	0	0.113	0	0	0	0	0.121	0.7505	0	0.453	0.413667
gi|116517255|ref|NM_001077381.1| Danio rerio zgc:153086 (zgc:153086), mRNA	0.693	0.337	0.585	0.9785	5.975	3.3705	0.231	5.394	1.136	0.946	1.853	0	1.814	0.645	0	0.304	0	0	0.5545	0	0.647	1.15367
gi|116517257|ref|NM_001077383.1| Danio rerio c2cd2-like (c2cd2l), mRNA	0.68	0.248	0.233	0	0.2375	0.03925	0.362	0	0.148	0.084	0.165	0	0.137	0.421	0.848	0	0	0.147	0.8095	0.7035	0	0.511667
gi|116517259|ref|NM_001077382.1| Danio rerio zgc:153923 (zgc:153923), mRNA	1.59	4.312	4.05825	29.0105	27.976	13.6352	5.501	49.004	18.894	9.177	45.011	0.954	5.537	3.364	6.102	10.841	2.658	3.497	5.549	1.4265	1.915	2.33633
gi|116517261|ref|NM_001077385.1| Danio rerio snail homolog 3 (snai3), mRNA	0	1.046	0	0	0	0	0.655	0	0	0.457	0	0.192	0	1.429	3.577	0	0.534	3.05	0.0335	0	0	5.95
gi|116517265|ref|NM_001077386.1| Danio rerio solute carrier family 27 (fatty acid transporter), member 6 (slc27a6), mRNA	0	0	0	0	0	0	0.072	0	0	0	0	0	1.083	0.584	0.224	0.471	0.117	0	0.1465	0	0	2.292
gi|116517267|ref|NM_001077387.1| Danio rerio alkB, alkylation repair homolog 5 (E. coli) (alkbh5), mRNA	0.636	2.449	0.558	0.222	1.142	0.4385	2.402	1.499	0.231	1.841	2.447	0.827	0.213	1.643	2.204	0.928	3.571	1.258	1.716	1.579	0.566	2.36933
gi|116517269|ref|NM_001077388.1| Danio rerio zgc:153346 (zgc:153346), mRNA	10.346	3.09	4.487	1.7515	8.7525	4.508	2.843	4.92	2.675	5.516	5.402	1.274	6.392	4.642	2.641	5.562	1.381	4.309	8.7285	18.3795	9.368	1.31967
gi|116517271|ref|NM_001077389.1| Danio rerio transcription factor A, mitochondrial (tfam), nuclear gene encoding mitochondrial protein, mRNA	2.179	1.472	2.04425	2.904	4.0525	3.49275	4.438	9.418	5.949	2.553	2.941	0	1.705	3.19	4.279	5.3	1.842	3.005	2.8005	1.5	1.203	2.131
gi|116517273|ref|NM_001077391.1| Danio rerio zgc:153997 (zgc:153997), mRNA	54.249	107.288	38.8633	21.464	62.57	188.8	100.695	74.404	23.254	105.921	89.58	54.218	45.929	53.544	39.807	44.645	46.063	39.673	80.655	83.5705	30.2845	16.0263
gi|116517275|ref|NM_001077390.1| Danio rerio hedgehog acyltransferase-like, b (hhatlb), mRNA	0	0.138	0.04125	0	0	0	0.264	0.401	0	0.07	0	0	0.228	0.132	0	0	0.062	0	0	0	0	2.068
gi|116517277|ref|NM_001077392.1| Danio rerio hypocretin (orexin) neuropeptide precursor (hcrt), mRNA	0	0	0.044	0	0.327	0	0	0	0	0	0	0	0	0	0	0	0	0	0	0	0	0.0306667
gi|116517279|ref|NM_001077393.1| Danio rerio component of oligomeric golgi complex 7 (cog7), mRNA	0.364	0.332	0.01575	0.331	0.058	0.24125	0.697	0.107	0.248	0.282	0.552	1.135	0.458	0.106	0.095	0.299	0.148	0.147	0	0.339	0.048	9.05733
gi|116812562|ref|NM_001077431.1| Danio rerio kinesin family member 6 (kif6), mRNA	0	0	0	0	0	0	0	0	0	0	0	0	0	0	0	0	0	0	0	0	0	0
gi|116812568|ref|NM_001077430.1| Danio rerio coiled-coil domain containing 55 (ccdc55), mRNA	3.305	3.545	2.92375	0.3055	6.1065	1.8085	3.563	4.124	4.458	3.014	3.66	1.365	4.108	1.808	1.01	2.34	2.113	2.517	1.622	2.095	5.358	2.46933
gi|116812570|ref|NM_001077432.1| Danio rerio si:ch211-57i17.1 (si:ch211-57i17.1), mRNA	0.186	0.113	0.7065	0.435	0.4105	0.74875	0.371	0	0.101	0.115	0	0.289	0	0.503	0	0	0.202	0	1.077	0	0.525	9.45767
gi|116812884|ref|NM_194395.2| Danio rerio baculoviral IAP repeat-containing 2 (birc2), mRNA	18.515	32.114	15.7085	7.9035	18.979	18.6683	26.405	20.601	19.085	23.768	17.301	52.415	13.94	20.168	25.304	30.751	15.83	17.673	25.5805	30.702	19.376	16.5607
gi|116812885|ref|NM_207100.2| Danio rerio zgc:77041 (zgc:77041), mRNA	2.356	3.085	1.3865	5.011	9.4425	1.715	2.898	7.262	2.572	1.349	3.082	0.848	5.47	2.387	2.072	1.587	1.871	0.196	2.3915	1.1285	2.6425	4.536
gi|116812886|ref|NM_001012373.2| Danio rerio RING1 and YY1 binding protein b (rybpb), mRNA	2.316	0.176	1.36325	2.526	1.233	0.6025	0.964	0.853	0.711	1.257	0.967	2.032	11.941	6.28	4.212	2.851	0.079	0.156	2.6625	0.9345	1.164	2.55333
gi|116812887|ref|NM_198146.2| Danio rerio v-akt murine thymoma viral oncogene homolog 2 (akt2), mRNA	1.513	1.9	1.25025	2.1325	2.006	1.72475	2.453	2.377	1.211	3.315	2.45	0.629	2.638	0.938	1.363	3.09	0.822	1.088	4.4735	0.771	2.8945	2.99033
gi|116812888|ref|NM_001039110.2| Danio rerio ripply3 (ripply3), mRNA	2.523	3.486	1.89975	1.075	2.647	0.93725	1.223	1.352	2.129	1.991	7.801	0.537	2.539	0.978	4.053	3.012	3.614	10.395	4.269	0.7105	8.521	1.204
gi|116812890|ref|NM_001007781.2| Danio rerio zgc:153845 (zgc:153845), mRNA	0.891	0	0	0	0	0.032	0.074	0	0	0.138	0	0	0	0.173	0	0	0	0.12	0.1515	0	0.0905	0.955
gi|116812891|ref|NM_001040096.2| Danio rerio tissue factor pathway inhibitor 2 (tfpi2), mRNA	0	0.124	0	0.1065	0	0.02925	0.271	0.24	0	0.379	0.618	0.159	0	0	0.847	0	0	0.33	0	0	0	3.01767
gi|116812892|ref|NM_001024398.2| Danio rerio zgc:112234 (zgc:112234), mRNA	0.22	0	0.40125	1.0305	0.8295	0.233	0.147	0.259	0.6	0.409	0.668	0	0	0	0	0	2.628	0	1.139	0.1955	0.412	0.304667
gi|116812895|ref|NM_001040094.2| Danio rerio coproporphyrinogen oxidase (cpox), mRNA	2.239	4.397	0.49625	2.0655	1.031	1.9725	3.213	3.856	3.948	1.388	1.255	20.684	2.772	3.136	1.074	4.146	2.058	0.186	1.4335	1.8215	0.14	3.86967
gi|116812897|ref|NM_001044929.2| Danio rerio si:ch211-254e15.2 (si:ch211-254e15.2), mRNA	0	0.786	0	0	0.406	0.0465	1.615	0	0.176	0.601	0.392	0	0	2.754	2.015	0.707	0.351	0.872	0	0.181	0.394	3.71567
gi|116812899|ref|NM_001040394.2| Danio rerio unc-119 homolog b (C. elegans) (unc119b), transcript variant 1, mRNA	11.774	11.317	13.368	11.672	8.1035	22.3708	24.866	10.127	30.751	20.229	18.072	0.124	1.921	1.603	0.992	0.697	12.536	26.097	23.5305	7.8755	30.1385	3.936
gi|116875769|ref|NM_001077448.1| Danio rerio cadherin 7, type 2 (cdh7), mRNA	0	0.174	0	0	0.3155	0.07925	0.143	0.169	0.078	0.356	0.61	0	0	0	0.597	0	0.078	0.232	0.0195	0.7565	0.1345	0.0186667
gi|116875772|ref|NM_001077449.1| Danio rerio ubiquitin specific peptidase 9 (usp9), mRNA	9.969	5.01	5.237	7.203	7.0865	15.2652	8.047	7.155	2.83	6.897	3.929	10.783	10.967	6.902	5.251	6.644	8.282	2.558	9.032	10.051	5.7645	4.60833
gi|116875774|ref|NM_001077450.1| Danio rerio GA binding protein transcription factor, beta subunit 1 (gabpb1), mRNA	0.244	3.264	3.19325	1.85	10.4455	5.02025	3.578	2.013	3.997	2.573	3.409	0.381	2.21	4.539	1.522	2.137	1.459	0.658	2.6145	5.3155	2.9075	0.336667
gi|116875778|ref|NM_001077452.1| Danio rerio desmin b (desmb), mRNA	1.464	0	0.062	0.1915	0.1445	0.02625	0.671	0	0.4	1.475	0.445	0.143	0	0.142	0.571	0	0.199	0.395	12.148	2.5265	0.1455	1.88333
gi|116875784|ref|NM_001077453.1| Danio rerio cytochrome P450, family 2, subfamily X, polypeptide 9 (cyp2x9), mRNA	0	0	0	0	0	0.0825	0	0	0	0	0	0	0	0.078	1.052	0.665	7.149	0.109	0	0	0	1.49233
gi|116875786|ref|NM_001077457.1| Danio rerio zgc:153637 (zgc:153637), mRNA	0.19	0.115	0.24275	0.5435	0.9245	0.33725	0.442	0.223	0.517	0.235	0.806	0	0.572	0	0	0	0.412	1.943	0.129	0	1.0415	0.0326667
gi|116875788|ref|NM_001077454.1| Danio rerio zgc:153629 (zgc:153629), mRNA	11.965	1.886	0.154	0.232	1.222	0.1015	1.255	0.261	0.726	1.649	0.807	0	2.675	0.429	0	0.243	0.361	0.478	17.0975	8.192	2.17	8.565
gi|116875790|ref|NM_001077455.1| Danio rerio protein phosphatase, Mg2+/Mn2+ dependent, 1H (ppm1h), mRNA	17.223	22.07	8.92925	7.5445	14.521	22.4522	18.005	11.344	9.311	10.786	6.974	65.326	30.412	40.041	10.532	18.111	4.221	4.191	16.009	15.4065	6.244	0.588667
gi|116875792|ref|NM_001077456.1| Danio rerio zgc:153968 (zgc:153968), mRNA	0.784	0.318	0	0	0	0	0.261	0	0	0.162	0	0.204	0	0.608	0.815	0.286	13.349	1.41	0	0.896	0	3.73533
gi|116875794|ref|NM_001077458.1| Danio rerio y cytochrome P450, family 2, subfamily AA, polypeptide 2 (cyp2aa2), mRNA	0	3.624	1.05125	0.4365	0.8495	0.38875	1.49	1.976	0.407	1.848	0.113	0.145	0	0.217	0	0.612	0.607	0.503	1.005	0.0615	1.225	0
gi|116875798|ref|NM_001077461.1| Danio rerio zgc:153423 (zgc:153423), mRNA	1.163	1.149	0.35275	0.2645	0	0	0.533	0	0.079	0.812	0	0.227	0	0.789	0.605	0.159	0.316	0.941	0.2965	0	0.2515	0
gi|116875800|ref|NM_001077462.1| Danio rerio fatty acid amide hydrolase 2b (faah2b), mRNA	0.583	0.354	0	0	0	0	0.194	0	0	0	0	0	0	0.828	0.606	0	6.964	1.152	0.0265	0.205	0.577	16.071
gi|116875806|ref|NM_001077463.1| Danio rerio zgc:153665 (zgc:153665), mRNA	0.452	0	0	0	0	0	0	0	0	0	0	0	0	0	0.47	0	0	0	0	0	0	5.186
gi|116875810|ref|NM_001077467.1| Danio rerio ATPase, Ca++ transporting, plasma membrane 4 (atp2b4), mRNA	0.856	2.811	0.6435	0.491	2.323	1.134	0.571	7.468	0.374	2.974	4.16	0.801	2.929	2.389	7.298	2.624	1.954	1.94	0.588	0	0.596	1.77667
gi|116875812|ref|NM_001077466.1| Danio rerio Bardet-Biedl syndrome 4 (bbs4), mRNA	0	0.354	0.03425	0	1.034	0.25175	1.017	0.514	0.238	0.812	0.265	0	0.439	0.113	0	0.159	0.158	0.784	1.4955	0	0.5835	4.567
gi|116875814|ref|NM_001077468.1| Danio rerio zgc:153377 (zgc:153377), mRNA	56.188	68.062	66.105	111.406	67.971	54.1178	71.54	83.522	36.399	32.246	26.487	96.485	177.204	134.852	67.563	61.498	73.366	29.41	40.039	11.952	25.615	9.79133
gi|117606120|ref|NM_001077560.1| Danio rerio zgc:152873 (zgc:152873), mRNA	3.184	1.972	1.359	1.3945	2.0505	1.27925	1.582	0.921	1.574	1.081	2.19	2.39	1.511	0.908	1.374	0.986	0.751	2.172	1.46	0.586	1.7705	7.945
gi|117606122|ref|NM_001077561.1| Danio rerio Abelson helper integration site 1 (ahi1), mRNA	6.003	1.537	1.586	0.7695	2.3635	2.8015	2.071	2.358	1.552	3.658	3.518	0	0.318	0.939	1.095	1.037	0.687	1.705	12.3905	0.281	5.361	0.763
gi|117606124|ref|NM_001077558.1| Danio rerio neuralized homolog a (Drosophila) (neurla), mRNA	0.896	0.218	0	0.047	0.7225	0.32075	0.269	1.056	0.049	1.167	0.816	0	0	0.243	0	0	0.876	2.078	0.2485	0.2245	0.0475	1.60833
gi|117606126|ref|NM_001077565.1| Danio rerio zgc:152968 (zgc:152968), mRNA	0	0	0.07525	0	0	0.018	0	0.147	0	0	0.076	0	0.126	0.097	0	0	0	0	0	0	0	6.04567
gi|117606128|ref|NM_001077559.1| Danio rerio short coiled-coil protein (scoc), mRNA	0	0	0	0.1015	0.247	0.16775	0	0	0	0	0.118	0	0	0.075	0	0	0.105	0.418	0	0	0.2845	8.21467
gi|117606132|ref|NM_001077562.1| Danio rerio zgc:153918 (zgc:153918), mRNA	17.193	14.552	7.06025	1.929	7.7675	4.97	23.049	10.911	5.343	17.47	8.916	15.267	2.795	13.375	10.174	14.186	5.893	12.059	22.333	9.875	10.122	0.442
gi|117606134|ref|NM_001077568.1| Danio rerio cathepsin F (ctsf), mRNA	5.258	33.349	34.3567	22.9525	35.8365	19.6355	46.456	46.397	14.664	54.732	60.768	31.814	55.911	42.951	55.547	87.105	26.101	32.509	38.012	25.841	57.4445	4.30667
gi|117606136|ref|NM_001077563.1| Danio rerio zinc finger, DHHC-type containing 18 (zdhhc18), mRNA	3.833	15.33	4.375	2.9985	8.0795	1.627	14.05	27.225	1.212	11.511	18.748	5.98	8.018	29.86	38.692	22.964	8.605	12.789	7.6495	1.8215	8.6195	2.974
gi|117606138|ref|NM_001077570.1| Danio rerio sodium channel, voltage-gated, type IV, beta a (scn4ba), mRNA	0.164	0.199	0.1425	0.0855	0	0	0.218	0	0.089	0	0	0	0	0	0	0	0	0	0.324	0	0.0435	1.223
gi|117606140|ref|NM_001077567.1| Danio rerio eukaryotic translation initiation factor 2-alpha kinase 1 (eif2ak1), mRNA	0.709	1.6	0.70825	2.032	0.304	1.19625	1.957	2.625	0.829	1.57	0.553	4.106	0.611	1.02	0.421	1.662	1.43	2.075	0.2535	6.3615	0.4595	5.34867
gi|117606142|ref|NM_001077573.1| Danio rerio sodium channel, voltage-gated, type IV, beta b (scn4bb), mRNA	0	0.415	0	0	0	0	0	0	0	0	0	0	0	0	0	0	0	0	0	0	0	0.497667
gi|117606144|ref|NM_001077569.1| Danio rerio zgc:153452 (zgc:153452), mRNA	1.944	2.177	0.7445	0.9085	2.1625	1.09775	2.694	4.221	0.335	3.617	2.548	3.113	1.236	0.991	1.383	2.912	6.672	1.601	2.2305	1.315	1.094	10.251
gi|117606148|ref|NM_001077574.1| Danio rerio cofactor required for Sp1 transcriptional activation, subunit 6 (crsp6), mRNA	69.099	46.892	60.8578	32.589	102.451	56.934	53.815	57.388	42.374	58.799	32.6	19.553	45.112	43.212	15.535	33.241	44.794	28.957	112.724	76.39	57.354	1.768
gi|117606150|ref|NM_001077578.1| Danio rerio zgc:153084 (zgc:153084), mRNA	0.916	1.578	1.868	1.1155	1.475	0.35625	3.612	2.699	0.917	2.651	1.113	0	0	0.887	5.713	2.841	0.249	0.165	0.1895	0	0.7365	8.918
gi|117606154|ref|NM_001077577.1| Danio rerio zgc:153498 (zgc:153498), mRNA	0.231	0	0	0	0	0	0.115	0	0	0	0	0	0	0.089	0.36	0	0	0	0	0	0.0305	1.344
gi|117606156|ref|NM_001077576.1| Danio rerio interleukin 1 receptor accessory protein-like 1a (il1rapl1a), mRNA	0.497	0.503	0.883	0.518	1.412	0.3405	0.965	0.976	0.407	0.975	0.855	0.646	0.25	0.706	0	0.091	0.72	2.769	2.4625	0.5425	1.343	0.625667
gi|117606158|ref|NM_001077580.1| Danio rerio DDB1 and CUL4 associated factor 12 (dcaf12), mRNA	7.913	2.51	3.2005	1.347	4.18	2.242	1.892	5.677	3.381	3.307	2.926	2.013	6.75	3.133	3.398	1.318	1.869	3.063	4.644	4.2625	6.574	1.889
gi|117606164|ref|NM_001077584.1| Danio rerio zgc:152911 (zgc:152911), mRNA	0.734	0.179	0.4305	0	0.1875	0.1235	0.147	0.173	0.321	0	0	0.458	0.887	0.569	0.305	0.161	0.16	0.555	1.673	0.3485	0	0.752333
gi|117606166|ref|NM_001077579.1| Danio rerio myosin phosphatase, target subunit 2 (mypt2), mRNA	0.666	0.058	0.19425	0.05	0.63	0.01925	0.127	0.561	0.052	0.236	0.52	0.148	0.287	0.037	0.099	0.521	0.103	0.154	0.105	0	0.3065	3.94033
gi|117606168|ref|NM_001077581.1| Danio rerio zgc:153073 (zgc:153073), mRNA	1.692	0.514	0.0455	0.882	0.559	0.56675	0.507	0.798	0.739	0.839	1.644	13.725	0.511	0.393	1.583	2.778	0.276	0.091	1.6415	0.8585	0.765	2.407
gi|117606170|ref|NM_001077583.1| Danio rerio zinc finger, MYND domain containing 11 (zmynd11), transcript variant 2, mRNA	3.148	2.791	6.0385	2.5675	4.4305	1.0535	2.754	6.339	4.87	3.335	8.286	3.479	7.655	4.879	2.455	5.599	5.56	5.379	7.462	0	5.296	7.885
gi|117606172|ref|NM_205616.2| Danio rerio chromobox homolog 8a (Pc class homolog, Drosophila) (cbx8a), mRNA	0.242	0.808	0.22625	0	0.4375	0.203	0.403	0.997	0.066	0.3	0.954	0	0	0.374	0	0.529	0	0.521	1.742	0	0.455	1.62067
gi|117606174|ref|NM_001034185.2| Danio rerio cytokine receptor family member b5 (crfb5), mRNA	273.166	142.046	122.587	271.82	424.635	397.398	161.1	226.322	128.027	272.954	197.139	199.815	666.2	264.609	123.655	254.807	140.236	70.709	386.487	728.538	321.219	1.19467
gi|117606176|ref|NM_001012369.2| Danio rerio exostoses (multiple) 1b (ext1b), mRNA	0.564	0.48	0.65075	0.5885	0.286	0.50625	1.016	0.266	0.123	0.84	1.028	0.528	0.227	0.481	0.704	0.741	1.472	0.244	1.196	1.1235	0.485	3.639
gi|117606178|ref|NM_001042761.2| Danio rerio frizzled homolog 3a (fzd3a), mRNA	0.583	0.071	0	0	0.2755	0.03375	0	0	0.064	0.072	0.071	0	0.117	0.678	0	0.255	0.19	0.126	0.0475	0	0.1095	0.381333
gi|117606179|ref|NM_199516.2| Danio rerio ST3 beta-galactoside alpha-2,3-sialyltransferase 5 (st3gal5), mRNA	0.722	1.755	0.2825	0.641	2.3135	0.68775	2.309	2.552	0.709	1.253	0.964	0	1.017	1.454	1.05	1.896	1.882	0.701	0.9835	1.2655	0.347	20.0213
gi|117606185|ref|NM_001044965.2| Danio rerio si:ch211-260p9.6 (si:ch211-260p9.6), mRNA	4.415	5.815	4.55675	6.335	11.4155	7.94625	6.804	11.492	7.934	8.1	6.034	2.152	13.698	8.411	2.677	10.47	3.599	8.238	6.5945	0	6.7765	0.880667
gi|117606187|ref|NM_001044908.2| Danio rerio ADP-ribosylation factor-like 3 (arl3), mRNA	0	0.086	0	0	0.045	0.049	0.094	0.166	0.154	0.088	0	0	0	0.055	0	0	0.077	0.152	0.019	0	0	6.82367
gi|117606196|ref|NM_001077598.1| Danio rerio amiloride binding protein 1 (amine oxidase (copper-containing)) (abp1), mRNA	0	0	0	0	0	0	0.043	0	0	0	0	0	0	0	0	0	2.448	0	0	0.021	0	5.429
gi|117606199|ref|NM_001077599.1| Danio rerio c-src tyrosine kinase (csk), mRNA	1.193	1.523	1.32175	0.654	1.9425	0.49375	1.868	1.828	0.26	1.405	2.898	2.698	0.72	2.218	1.364	1.828	0.454	1.03	0.905	0.0195	1.7315	13.9503
gi|117606205|ref|NM_001077603.1| Danio rerio activating transcription factor 7 interacting protein (atf7ip), mRNA	39.153	13.744	15.2668	4.6945	25.1335	6.0465	11.061	11.628	4.769	9.241	7.989	8.497	38.465	22.02	22.006	21.146	5.026	6.764	18.007	9.309	8.467	32.79
gi|117606207|ref|NM_001077600.1| Danio rerio protein phosphatase, Mg2+/Mn2+ dependent, 1La (ppm1la), mRNA	0.254	0.308	0.2715	0	2.8705	0.42625	0.296	5.383	0.208	1.023	2.851	1.781	2.425	3.343	2.901	2.499	1.448	1.369	0.4775	0	1.534	8.23167
gi|117606209|ref|NM_001077605.1| Danio rerio zgc:153381 (zgc:153381), mRNA	0	0.29	0.21325	0	0.493	0.28975	1.353	0.563	0	0.444	0	0.186	0	0.833	1.987	0	0.389	1.031	0	0	0.097	0.307667
gi|117606211|ref|NM_001077602.1| Danio rerio cytochrome P450, family 4, subfamily V, polypeptide 2 (cyp4v2), mRNA	0	0	0	0	0	0	0	0	0	0	0	0	0	0	0	0	1.26	0.074	0	0	0	6.231
gi|117606215|ref|NM_001077555.1| Danio rerio zgc:153898 (zgc:153898), mRNA	10.676	0.209	0	0	0	0.02475	0.057	0	0.094	0.107	0	0.269	0	0.133	3.58	0.942	0.374	0	0	6.0095	0.1615	0.7
gi|117606217|ref|NM_001077557.1| Danio rerio multiple inositol polyphosphate histidine phosphatase, 1a (minpp1a), mRNA	0.144	0	0.034	0.337	0.294	0	0.144	0.169	0.157	0	0	0.673	0.723	0.056	0	0.157	0.156	0	0.142	0	0.2515	1.145
gi|117606219|ref|NM_001077553.1| Danio rerio zgc:153343 (zgc:153343), mRNA	0	0.108	0	0	0	0	0	0	0.097	0	0	0	0	0.137	0	0.194	0	0	0	0	0	1.54967
gi|117606223|ref|NM_001077554.1| Danio rerio tyrosine aminotransferase (tat), nuclear gene encoding mitochondrial protein, mRNA	0	0	0.0315	0	0	0.02375	0.055	0	0	0	0.603	0.129	0	0	0	0	0	0	0.0225	0	0.1115	8.97933
gi|117606225|ref|NM_001077552.1| Danio rerio ddb1 and cul4 associated factor 5 (dcaf5), nuclear gene encoding mitochondrial protein, mRNA	1.499	0.304	0.42425	1.2365	0.67	0.45025	0.416	0.442	0.205	0.465	0.683	1.266	0	0.532	0.26	0.273	0	0.067	0.9525	0.7905	0.5035	1.126
gi|117606227|ref|NM_001077551.1| Danio rerio agmatine ureohydrolase (agmatinase) (agmat), mRNA	0	0.85	0.24125	0	0.1095	0	0.388	0	0.254	0.144	0.566	0	0	0	0	0.51	0	0	0	0	0.626	0.881
gi|117606229|ref|NM_001077550.1| Danio rerio solute carrier family 18 (vesicular acetylcholine), member 3a (slc18a3a), mRNA	0.42	0.255	0.87	1.571	0.0655	0.29575	0.98	0.825	0.229	0.868	0.85	0	0	0	0	0.306	0.228	0.604	0.7685	0	0.525	0.133333
gi|117606231|ref|NM_001077549.1| Danio rerio doublecortin-like kinase 1 (dclk1), mRNA	0.147	0.268	0.2275	0.077	0.9755	0.04225	0.392	0.346	0.16	0.091	0.089	0	0	0	0	0	0	0.238	0	0	0.06	3.75333
gi|117606233|ref|NM_001077548.1| Danio rerio cytochrome P450, family 3, subfamily C, polypeptide 4 (cyp3c4), mRNA	0.581	0.618	0.3855	0	0.2045	0	0.193	0	0.238	0.45	0.705	0	1.022	0.225	1.207	1.43	0.237	0.235	0.1605	0.1535	0.272	0.805333
gi|117606235|ref|NM_001077544.1| Danio rerio CTD (carboxy-terminal domain, RNA polymerase II, polypeptide A) small phosphatase like 2a (ctdspl2a), mRNA	1.212	0.655	0.51725	0	0.786	0.144	2.155	1.905	0.294	1.17	0.9	0.105	0.678	1.096	0.56	1.327	0.952	1.744	2.0055	0.3285	0.3235	2.10633
gi|117606237|ref|NM_001077547.1| Danio rerio zgc:153973 (zgc:153973), mRNA	0	0	0.064	0	0	0.0895	0.054	0	0	0.906	1.38	0	0	0	0	0	0	0.175	1.2405	0	0.327	0.106667
gi|117606239|ref|NM_001077546.1| Danio rerio zgc:152990 (zgc:152990), mRNA	1.23	0.997	3.0005	1.2095	1.123	2.30875	1.593	1.288	1.641	1.356	2.572	0.213	2.474	0.794	1.136	0.748	0.52	2.211	1.1585	0.1215	3.0015	3.77267
gi|117606241|ref|NM_001077545.1| Danio rerio G elongation factor, mitochondrial 2 (gfm2), nuclear gene encoding mitochondrial protein, mRNA	0.253	0.385	0.179	0.363	1.379	0.9415	1.225	1.494	0.346	1.257	1.231	0.297	0.51	0.687	0.395	1.248	0.275	0.82	1.161	0	1.071	1.46167
gi|117606243|ref|NM_001077543.1| Danio rerio zgc:154110 (zgc:154110), mRNA	9.774	2.104	0.246	1.701	2.8655	4.00075	2.171	2.88	1.334	2.652	1.731	0.794	1.844	3.708	0.212	1.56	0.221	0	0.814	1.8385	0.979	2.54167
gi|117606247|ref|NM_001077540.1| Danio rerio zgc:152928 (zgc:152928), mRNA	0	0	0.022	0	0.0465	0	0	0	0	0	0	0	0	0	0	0	0	0.237	0	0	0	7.11367
gi|117606249|ref|NM_001077541.1| Danio rerio calmegin (clgn), mRNA	5.242	7.011	3.2885	2.3095	6.6775	3.76625	7.686	9.199	3.18	4.118	4.741	3.453	2.344	5.823	6.781	7.14	2.912	6.034	5.0075	15.0515	5.313	1.70533
gi|117606251|ref|NM_001077535.1| Danio rerio zgc:152779 (zgc:152779), mRNA	1.312	3.588	0.6825	5.5195	2.3255	4.23525	4.098	5.218	6.445	3.05	1.892	0.767	1.98	3.367	1.534	4.127	1.604	2.654	1.7025	0.87	1.078	23.313
gi|117606253|ref|NM_001077538.1| Danio rerio sialidase 3.3 (neu3.3), mRNA	0.968	2.523	1.11975	0.5795	0.9605	0.81525	2.167	2.446	1.133	2.831	3.277	1.727	4.037	6.593	5.321	1.968	3.383	6.046	4.5155	1.445	2.9665	1.20733
gi|117606255|ref|NM_001077536.1| Danio rerio zgc:152778 (zgc:152778), mRNA	2.951	0.163	0.0465	0	0.042	0	0.149	0.211	0.049	0	0.217	0	0.27	0.139	0	0	0.097	0	0.038	0	0.06	2.181
gi|117606257|ref|NM_001077537.1| Danio rerio chloride channel 7 (clcn7), mRNA	0.256	1.139	0.496	0.312	0.9	0.41325	1.675	1.004	0.558	1.532	0.983	0.997	1.286	1.122	0.354	1.585	0.694	1.057	0.6385	0.856	1.051	2.42567
gi|117606259|ref|NM_001077534.1| Danio rerio zgc:152896 (zgc:152896), mRNA	0.348	0.55	0.13325	0.1095	0.6715	0.45175	0.557	0.985	0.152	1.079	0.211	0.814	0.28	0.351	0	0.229	0.227	0.676	0.4125	0.204	0.3075	3.326
gi|117606261|ref|NM_001077532.1| Danio rerio CCR4-NOT transcription complex, subunit 10 (cnot10), mRNA	1.031	2.148	1.1175	0.962	1.721	1.8865	2.944	1.215	0.723	2.465	1.163	0	0.741	1.54	2.908	1.45	4.64	0.874	2.4515	1.291	1.679	4.50167
gi|117606263|ref|NM_001077531.1| Danio rerio sarcalumenin (srl), mRNA	2.546	2.764	0.50875	3.084	0.7745	0.63525	2.121	3.001	1.291	2.03	1.547	2.838	7.687	2.044	4.349	1.394	2.273	2.061	0.907	0.09	1.174	4.296
gi|117606265|ref|NM_001077533.1| Danio rerio ATPase, Ca++ transporting, cardiac muscle, fast twitch 1 like (atp2a1l), mRNA	0	0.06	0	0	0.046	0.08825	0.066	0	0	0.183	0.119	0	0	0.114	0.409	0	0.053	0.053	0.271	0	0	107.473
gi|117606280|ref|NM_131371.1| Danio rerio myotubularin related protein 2 (mtmr2), mRNA	4.481	11.297	6.723	9.4845	23.391	17.4393	15.283	18.95	10.361	13.241	10.246	12.13	59.408	42.435	36.99	41.398	4.655	9.243	12.625	1.155	7.532	1.20667
gi|117606282|ref|NM_001077607.1| Danio rerio immunoresponsive gene 1, like (irg1l), mRNA	2.556	0.311	0.3025	0	0	0	0	0	0	0	0	0	0	0	0.177	0	0.185	0	0	0	0	0.149333
gi|117606284|ref|NM_001077606.1| Danio rerio angiomotin like 2b (amotl2b), mRNA	12.921	20.12	13.621	14.3995	19.536	27.5542	32.707	30.992	10.767	10.965	13.631	3.448	7.071	4.172	3.888	6.947	6.59	6.849	15.936	6.2445	12.4375	1.638
gi|117606286|ref|NM_001077609.1| Danio rerio zgc:153981 (zgc:153981), mRNA	0	0.557	0.12275	0.192	0	0	0.855	0.216	0.1	0.114	0	0.715	0	0.426	0.191	0	0.299	0.494	0.0745	0.03	0.123	0.504667
gi|117606288|ref|NM_001077604.1| Danio rerio Kruppel-like factor 11b (klf11b), mRNA	28.411	40.749	12.277	36.6135	38.5055	20.4322	36.508	78.6	24.055	35.978	98.371	7.962	28.758	31.377	18.569	26.627	27.177	12.758	43.786	18.836	9.93	2.73867
gi|117606290|ref|NM_001077611.1| Danio rerio aspartyl-tRNA synthetase (dars), mRNA	10.061	7.577	4.57575	12.7725	9.3745	24.4557	8.307	7.788	9.838	9.127	8.118	10.307	7.706	5.12	2.498	12.656	6.609	2.674	14.0615	18.175	12.083	9.31233
gi|117606292|ref|NM_001077608.1| Danio rerio mitochondrial tumor suppressor 1a (mtus1a), nuclear gene encoding mitochondrial protein, mRNA	0.12	3.198	0.82225	1.124	3.0355	0.83525	11.635	3.664	1.371	6.822	7.916	2.798	1.805	7.969	10.69	4.319	5.977	16.708	3.622	0.067	4.7845	8.00433
gi|117606294|ref|NM_001077613.1| Danio rerio zgc:153345 (zgc:153345), mRNA	0.5	0.061	0.034	0	0	0	0	0	0	0	0	0	0.201	0.077	0.104	0	0.217	0.755	0	0	0	12.5487
gi|117606296|ref|NM_001077610.1| Danio rerio zgc:153635 (zgc:153635), mRNA	19.567	10.718	15.3198	5.111	28.867	14.8778	14.461	12.559	9.202	22.107	12.238	8.613	10.526	15.914	11.681	16.539	10.422	7.63	25.1385	42.5555	24.3785	0.983
gi|117606298|ref|NM_001077616.1| Danio rerio serine/threonine kinase 35 (stk35), mRNA	0.875	4.042	0.167	0	0.7485	0.546	10.435	4.33	1.337	8.137	2.763	0.682	0.528	13.015	35.282	2.681	4.468	33.319	1.056	0.8705	2.273	0.492667
gi|117606300|ref|NM_001077612.1| Danio rerio phosphorylase kinase, gamma 1a (muscle) (phkg1a), mRNA	38.262	46.596	45.333	10.0775	27.083	13.1325	48.311	55.038	21.29	79.224	92.366	40.047	69.496	57.076	68.494	50.842	48.29	82.507	63.8355	25.5145	96.505	14.176
gi|117606302|ref|NM_001077618.1| Danio rerio zinc finger, HIT-type containing 2 (znhit2), mRNA	0.564	0.343	0.82575	0.3425	0.9205	0.1355	0.251	1.108	0	0.7	0.228	1.027	0.757	0.073	0.195	0.617	0.92	0.913	0.1825	0	0.276	4.41833
gi|117606304|ref|NM_001077614.1| Danio rerio zgc:154039 (zgc:154039), mRNA	13.592	99.157	10.3123	7.9575	14.2505	3.45525	93.573	63.398	18.946	96.76	120.937	184.97	351.804	657.875	877.382	684.644	49.735	89.091	26.4125	3.793	41.801	3.65567
gi|117606306|ref|NM_001077615.1| Danio rerio sphingomyelin phosphodiesterase 5 (smpd5), nuclear gene encoding mitochondrial protein, mRNA	0.77	1.217	0.08275	0.0805	0.439	0.48975	0.718	0.363	0	0.668	0.094	0.36	0.155	0.656	0.16	0.506	0.502	0.166	0.496	0.4365	0.207	2.12567
gi|117606309|ref|NM_001077617.1| Danio rerio nyctalopin (nyx), mRNA	1.925	1.316	2.077	0.882	0.3025	1.1485	3.127	2.552	0.525	7.609	1.607	0.751	1.937	0.653	5.502	1.58	8.889	34.527	8.5305	0	9.028	0
gi|117606400|ref|NM_001077626.1| Danio rerio cytokine receptor family member b2 (crfb2), mRNA	0	0.237	0	0	0	0.11925	0.13	0.307	0	0.242	0	0.101	0.131	0.252	0.271	0	0.283	0.421	0	0	0.069	3.14933
gi|117606402|ref|NM_001077625.1| Danio rerio cytokine receptor family member b7 (crfb7), mRNA	0.277	1.739	0.582	0.0965	0.67	0	1.107	1.196	0.151	0.687	1.738	2.087	1.114	0.644	0.576	0.404	1.153	0.647	0.7255	0.249	3.225	0.0646667
gi|117606404|ref|NM_001077627.1| Danio rerio cytokine receptor family member b6 (crfb6), mRNA	0.525	1.835	0.18975	0.0685	0.5395	0.4865	1.181	0.928	1.075	0.57	2.232	0.717	0.528	0.814	1.091	2.011	0.856	1.345	0.6545	0.0215	0.438	3.02333
gi|117647268|ref|NM_001077629.1| Danio rerio sodium channel, voltage-gated, type II, beta (scn2b), mRNA	0	0	0.06125	0	0.1535	0	0.046	0	0	0	0	0	0	0	0	0	0	0	0	0	0	0.782
gi|117676394|ref|NM_001077652.1| Danio rerio basic helix-loop-helix family, member a15 (bhlha15), mRNA	0	0	0	0	0	0	0	0	0	0	0	0	0	0	0	0	0	0	0	0	0	0
gi|117935042|ref|NM_214731.2| Danio rerio dapper homolog 1, antagonist of beta-catenin (xenopus) (dact1), mRNA	0.6	0.79	0.2005	0	0.064	0.3585	0.533	0.118	1.528	0.248	1.7	1.872	2.817	2.634	3.43	2.298	2.173	3.506	0.6695	0.201	1.0975	0.591667
gi|118150409|ref|NM_001077716.1| Danio rerio zgc:153126 (zgc:153126), mRNA	0.115	0	0.063	0	0	0	0	0.272	0	0	0	0	0.116	0	0.36	0	0	0	0	0.152	0	20.617
gi|118150411|ref|NM_001077717.1| Danio rerio zgc:154024 (zgc:154024), mRNA	0	1.049	0	0	0.122	0	1.597	0.226	0	0.357	0	0.747	0	2.451	2.59	0	0.104	1.448	0	0.0315	0	0.486333
gi|118150413|ref|NM_001077718.1| Danio rerio zgc:153407 (zgc:153407), mRNA	4.454	14.44	2.8655	4.461	9.012	8.7745	18.551	10.936	9.726	8.516	6.087	18.238	13.444	21.859	30.48	19.905	9.478	18.222	6.677	3.9625	5.0185	8.954
gi|118150415|ref|NM_001077719.1| Danio rerio zgc:153935 (zgc:153935), mRNA	0.142	0.345	0.0335	0.1485	0.1995	0.04075	0.283	0.334	0.155	0.352	1.205	0.884	0.57	1.373	1.326	0.931	0	0.841	0	0	0.0575	4.53767
gi|118150417|ref|NM_001077720.1| Danio rerio zgc:153914 (zgc:153914), mRNA	10.184	8.826	6.10625	8.934	19.807	9.2185	18.015	17.75	9.878	22.039	24.217	4.817	4.906	11.545	9.01	13.637	4.533	12.334	9.2305	7.8295	8.327	1.47833
gi|118150419|ref|NM_001077721.1| Danio rerio si:ch211-137a8.2 (si:ch211-137a8.2), mRNA	0	2.459	0.14225	0.073	0.0655	0.12075	4.509	1.151	0.152	1.211	0	0.544	0	3.729	5.655	0.153	1.44	3.386	0	0.4325	0.074	12.2883
gi|118150421|ref|NM_001077723.1| Danio rerio zinc finger, FYVE domain containing 28 (zfyve28), mRNA	3.649	11.978	10.3447	3.018	10.34	13.1745	15.077	10.075	3.13	11.961	9.118	8.619	1.993	3.231	3.359	3.879	7.987	7.031	11.249	9.976	22.4925	1.32
gi|118150423|ref|NM_001077722.1| Danio rerio zgc:152898 (zgc:152898), mRNA	0	0	0.11425	0.051	0.3265	0.2025	0.358	0.231	0.053	0.182	0.535	0.458	1.082	1.516	0.61	2.997	0.372	0.633	0.4515	0.57	0.4065	4.97967
gi|118150425|ref|NM_001077724.1| Danio rerio zgc:154054 (zgc:154054), mRNA	11.986	1.518	0.2015	0.0655	0	0	0.166	0	0.068	0.232	0	0	0.879	0	0	0	10.448	0.135	1.2165	1.086	0.051	3.45233
gi|118150427|ref|NM_001077725.1| Danio rerio ATH1, acid trehalase-like 1 (yeast) (athl1), mRNA	2.778	1.605	1.437	3.079	3.722	1.774	2.777	2.62	1.138	2.757	2.025	0.758	0.839	1.615	0	4.257	0.453	0.075	10.288	2.38	0.8175	1.09967
gi|118150431|ref|NM_001077727.1| Danio rerio leucine rich repeat containing 48 (lrrc48), mRNA	2.333	0	0	0	0	0	0	0	0.212	0.241	0	0	0	0.226	0.606	0	0	0	0	1.211	0	0.302667
gi|118150433|ref|NM_001077728.1| Danio rerio zgc:153521 (zgc:153521), mRNA	0	1.256	0.17375	0	0.2795	0.0425	1.623	0.696	0.242	0.092	0.269	0.23	0	1.201	1.38	0	0.08	0.557	0.146	0.467	0.06	0.219667
gi|118150435|ref|NM_001077730.1| Danio rerio transmembrane protein 51a (tmem51a), mRNA	0.163	0.198	0.1405	0.68	0.334	0	0.653	0.192	0.178	0.405	0	0	1.314	0.253	0.17	0.536	0.089	0.352	0.792	0	0.5225	6.56
gi|118150437|ref|NM_001077729.1| Danio rerio zgc:153952 (zgc:153952), mRNA	0	1.164	0.04125	0	0	0.052	1.233	0	0.139	0.237	0.543	0.199	0.128	0.593	1.061	0.14	0.139	1.239	0.466	0.1345	0.3745	18.559
gi|118150439|ref|NM_001077731.1| Danio rerio zgc:154093 (zgc:154093), mRNA	4.228	6.501	2.901	4.0245	2.83	1.95375	6.63	4.983	1.901	11.645	7.704	6.111	5.505	16.382	10.729	21.912	3.581	9.46	7.8215	1.9585	10.126	0.516667
gi|118150441|ref|NM_001077732.1| Danio rerio 1-acylglycerol-3-phosphate O-acyltransferase 2 (lysophosphatidic acid acyltransferase, beta) (agpat2), mRNA	1.232	6.739	3.66575	4.1535	2.887	1.23525	10.911	8.71	4.483	9.739	17.892	8.727	19.932	26.129	32.97	36.398	9.927	18.662	3.673	1.282	16.78	3.706
gi|118150443|ref|NM_001077733.1| Danio rerio zgc:153976 (zgc:153976), mRNA	0	0.099	0.01025	0	0	0.0235	0.027	0.096	0.044	0	0	0	0	0.126	0	0.178	0.088	0.481	0.2015	0	0.033	1.145
gi|118150445|ref|NM_001077734.1| Danio rerio zgc:153012 (zgc:153012), mRNA	0.758	5.532	3.88375	1.254	1.878	3.31375	10.95	9.534	2.622	15.52	12.436	1.774	4.324	3.33	2.102	9.683	7.28	12.001	4.9985	5.0725	11.8815	0.772333
gi|118150447|ref|NM_001077735.1| Danio rerio block of proliferation 1 (bop1), mRNA	3.327	2.167	1.20075	0	1.2955	0.411	1.782	1.12	0.259	1.253	1.155	0.834	0	0.829	2.841	1.17	1.55	2.244	1.9555	1.4485	0.6385	9.92767
gi|118150449|ref|NM_001077736.1| Danio rerio zgc:153507 (zgc:153507), mRNA	0.505	3.38	1.9655	0.5545	0.7665	1.098	2.29	2.74	1.104	2.633	6.139	1.025	0.509	1.684	3.047	1.77	1.758	4.472	1.291	1.432	3.1395	2.378
gi|118150451|ref|NM_001077737.1| Danio rerio suppression of tumorigenicity 14 (colon carcinoma) b (st14b), mRNA	0.125	0	0	0	0	0	0	0	0	0.078	0	0	0	0.049	0	0	0	0	0	0	0	1.22067
gi|118150453|ref|NM_001077738.1| Danio rerio transmembrane protease, serine 4a (tmprss4a), mRNA	9.15	1.29	0.023	0	0	0	0.044	0	0	0.082	0.322	0.103	0	0	0	0	0.36	0.715	0.4585	0.389	0	2.52733
gi|118150455|ref|NM_001077739.1| Danio rerio zgc:153215 (zgc:153215), mRNA	0	0	0.032	0	0	0	0.079	0.14	0	0	0.217	0.093	0	0.185	0	0.391	0	0.257	0	0	0	4.06067
gi|118150457|ref|NM_001077740.1| Danio rerio zgc:154106 (zgc:154106), mRNA	7.409	6.757	3.11875	0.8715	6.511	5.2795	7.983	9.169	3.236	5.284	6.15	0.867	5.094	2.727	3.851	7.028	2.08	3.531	7.957	0.354	5.468	1.509
gi|118150459|ref|NM_001077741.1| Danio rerio TEL2, telomere maintenance 2, homolog (S. cerevisiae) (telo2), transcript variant 1, mRNA	2.029	2.878	0.7105	0.354	3.208	1.4325	1.803	3.321	1.046	1.677	2.19	2.637	1.928	0.611	0.234	2.96	0.796	0.426	4.5105	0.843	2.46	3.105
gi|118150461|ref|NM_001077743.1| Danio rerio septin 7b (sept7b), transcript variant 1, mRNA	5.027	8.659	3.965	1.6565	9.159	3.18625	6.262	13.12	2.614	11.135	8.361	6.442	5.42	16.975	6.719	13.756	6.634	2.454	4.681	0.6545	1.4235	4.10267
gi|118150465|ref|NM_001077744.1| Danio rerio OTU domain containing 7B (otud7b), mRNA	0.093	0.563	0.643	0.2655	0.9255	1.49425	0.833	0.436	0.505	0.746	1.799	0.433	0.931	0.036	0.289	1.317	0.251	0.549	0.616	0.644	3.1185	1.37867
gi|118150467|ref|NM_001077745.1| Danio rerio zgc:153125 (zgc:153125), mRNA	15.222	8.619	15.1502	11.8205	25.3745	22.5368	14.173	25.629	16.051	13	18.385	5.563	17.241	10.549	8.771	13.043	9.405	11.826	30.615	10.456	20.092	2.012
gi|118150473|ref|NM_001077748.1| Danio rerio secretogranin II (chromogranin C), b (scg2b), mRNA	0.258	0	0	0	0	0	0.043	0	0	0.08	0	0	0	0.05	0	0	0.562	4.042	0.1955	0	0	2.79233
gi|118150517|ref|NM_001077750.1| Danio rerio kelch-like 6 (Drosophila) (klhl6), transcript variant 2, mRNA	0	0	0	0	0	0	0	0	0	0	0	0	0	0	0	0	0	0	0	0	0	0.008
gi|118150519|ref|NM_001077753.1| Danio rerio hypothetical LOC777705 (zgc:123114), mRNA	0	0	0	0	0	0	0	0	0	0	0	0	0	0	0	0	0	0	0	0	0	0
gi|118150527|ref|NM_001077759.1| Danio rerio G protein pathway suppressor 1 (gps1), mRNA	47.968	58.211	50.4438	38.2655	48.4845	61.525	71.626	64.888	61.799	48.116	46.682	62.358	46.071	88.425	41.176	91.081	38.8	33.33	68.6105	43.1745	39.398	12.1643
gi|118150529|ref|NM_001077757.1| Danio rerio zgc:154029 (zgc:154029), mRNA	0.362	0.66	0.21825	0.377	0.272	0.11225	0.422	0.747	0.247	1.178	1.264	0.423	0.091	0.421	0.847	0.693	0.541	1.562	0.5495	0.304	0.435	5.321
gi|118150531|ref|NM_001077756.1| Danio rerio zgc:153892 (zgc:153892), mRNA	2.098	5.326	5.247	9.139	1.9265	0.95025	8.923	6.109	5.524	4.821	9.444	0.481	2.732	1.243	0	0.81	1.207	7.59	1.602	2.086	4.7135	4.69933
gi|118150535|ref|NM_001077760.1| Danio rerio zgc:152816 (zgc:152816), mRNA	4.42	3.735	1.70175	1.376	5.2345	1.8275	3.736	7.496	2.472	4.278	5.631	1.345	1.844	2.464	4.37	5.545	1.523	6.223	10.245	5.2495	4.7425	3.52833
gi|118150537|ref|NM_001077762.1| Danio rerio zgc:136531 (zgc:136531), mRNA	0	0	0.011	0	0.0405	0	0.042	0	0	0.158	0	0	0	0	0	0	0	0	0.0345	0	0	0.163
gi|118150539|ref|NM_001077761.1| Danio rerio zgc:153038 (zgc:153038), mRNA	0	0.111	0	0	0	0	0.244	0	0.1	0.227	0.889	0	0	0.213	0.38	0	0.099	0.296	0	0	0	1.696
gi|118150541|ref|NM_001077763.1| Danio rerio AT rich interactive domain 2 (ARID, RFX-like) (arid2), mRNA	14.287	3.303	2.5065	4.4455	4.4095	4.40875	4.069	3.022	2.067	5.566	2.225	4.239	2.887	4.85	3.618	5.146	2.057	1.318	12.9615	5.2575	4.658	3.16867
gi|118150543|ref|NM_001077764.1| Danio rerio oculocerebrorenal syndrome of Lowe (ocrl), mRNA	3.297	1.797	1.1625	1.009	1.0985	2.78225	2.69	3.752	2.172	4.583	2.348	2.305	1.945	2.951	3.663	6.221	1.853	3.128	0.865	0	1.1855	1.89133
gi|118150545|ref|NM_001077765.1| Danio rerio bone morphogenetic protein 3 (bmp3), mRNA	0.52	0.19	0	0	0	0	0.277	0	0	0.387	0	0.081	0	0.202	0.325	0.228	0.057	0.281	0.1595	0.017	0	0.444333
gi|118150547|ref|NM_001077768.1| Danio rerio zinc finger, RAN-binding domain containing 1b (zranb1b), mRNA	8.509	3.104	2.87175	2.702	3.691	2.61575	4.678	3.844	2.632	5.101	5.168	5.199	2.569	5.99	2.064	4.812	3.545	3.137	7.2635	4.776	4.0635	0.760333
gi|118150549|ref|NM_001077766.1| Danio rerio family with sequence similarity 160, member B2 (fam160b2), mRNA	0	1.924	1.4065	0.8545	2.1505	1.3895	2.546	2.058	1.132	2.708	4.707	2.809	3.954	3.468	3.744	4.778	1.483	5.182	1.167	4.8305	3.8315	3.00433
gi|118150551|ref|NM_001077770.1| Danio rerio FK506 binding protein 3 (fkbp3), transcript variant 2, mRNA	102.393	70.597	22.819	29.1125	70.5485	62.297	98.753	81.926	66.354	74.085	50.562	65.257	37.693	65.156	48.46	78.357	58.803	33.235	71.2805	40.9965	41.884	2.546
gi|118150553|ref|NM_001077767.1| Danio rerio 3'-phosphoadenosine 5'-phosphosulfate synthase 2a (papss2a), mRNA	0.74	1.499	0.57025	0.741	1.1475	0.145	3.041	4.941	0.471	9.33	22.544	0	0.62	0.812	1.154	2.294	13.669	4.324	1.1055	0.63	5.687	3.813
gi|118150555|ref|NM_001077771.1| Danio rerio zgc:109782 (zgc:109782), mRNA	31.835	4.918	5.31575	10.476	37.5135	28.4763	6.174	17.838	5.556	10.519	12.996	2.646	0.263	0.506	0	3.427	2.41	1.83	8.372	1.204	5.1785	0.292667
gi|118150557|ref|NM_001077769.1| Danio rerio zgc:154085 (zgc:154085), mRNA	0.471	2.1	2.1465	1.4765	5.3335	3.814	2.774	2.962	1.715	4.383	4.96	4.165	3.635	3.043	2.775	3.953	1.451	6.948	2.161	4.4815	2.8565	1.989
gi|118150561|ref|NM_001077773.1| Danio rerio zgc:113443 (zgc:113443), mRNA	0.298	0.543	0.72025	0.312	0.922	0.10725	0.695	1.58	0.325	0.277	1.719	0	1.049	0.693	1.394	0.652	1.295	1.688	1.2895	0.623	3.6265	3.81367
gi|118150567|ref|NM_001077775.1| Danio rerio ribosomal protein S6 kinase a, polypeptide 1 (rps6ka1), mRNA	2.07	31.563	0.371	1.0805	0.302	0.14175	27.968	21.211	4.087	28.051	36.952	67.826	3.365	15.551	42.714	38.174	25.009	59.803	1.49	0.7345	4.667	2.77767
gi|118150569|ref|NM_001077777.1| Danio rerio zgc:153726 (zgc:153726), mRNA	1.063	0.162	0.25175	0.139	0.504	0.26825	0.974	1.253	0.435	2.473	0.969	0	0.802	1.339	0	0.873	0	0.574	2.1565	0	1.607	0.617667
gi|118150571|ref|NM_001077780.1| Danio rerio retinoblastoma 1 (rb1), mRNA	4.293	3.19	0.77075	1.8175	4.758	0.5825	2.956	3.036	1.302	1.775	2.955	0.074	0.768	1.737	0.099	1.566	1.97	3.86	3.4065	2.76	1.855	1.712
gi|118150573|ref|NM_001077778.1| Danio rerio stromal membrane-associated protein 1 (smap1), mRNA	5.324	10.125	8.44625	3.7035	10.5945	9.63925	10.872	8.527	7.825	8.297	7.628	8.518	4.807	9.151	7.947	7.172	7.121	11.563	9.8845	4.3225	5.041	5.15867
gi|118150575|ref|NM_001077779.1| Danio rerio nephrosin (npsn), transcript variant 1, mRNA	11.07	13.31	0.99825	0.129	0	0	2.951	0	0.671	0.153	0	0.384	0.248	0.477	0	0.269	3.342	0.531	5.118	1.159	0	4.81733
gi|118150577|ref|NM_001077782.1| Danio rerio fibroblast growth factor 12 (fgf12), mRNA	0.416	0.38	0.0675	0.654	0	0.115	1.18	0	0.114	2.066	1.897	0.162	0	1.049	1.948	0.228	0.679	3.033	0	0.631	4.7405	0.0553333
gi|118150579|ref|NM_001077781.1| Danio rerio zinc finger, DHHC domain containing 15b (zdhhc15b), mRNA	0.529	0.08	0.00825	0	0.062	0	0.176	0.779	0.217	0.082	2.409	0	0.133	0.154	0.275	0.434	0.144	0.642	0.2415	0.096	0.2315	0.947
gi|118150585|ref|NM_001077785.1| Danio rerio zgc:153996 (zgc:153996), mRNA	1.039	1.769	0.8285	0.5985	0.8715	1.10025	1.212	1.469	0.34	0.902	0.694	3.323	1.255	0.886	0.432	0.796	0.96	0.953	0.7945	0	0.1395	4.05
gi|118150587|ref|NM_001077787.1| Danio rerio zgc:153638 (zgc:153638), mRNA	0	1.651	1.045	1.1935	0.939	0.1555	1.414	1.8	0.926	1.263	1.134	0.132	0.171	0.526	0.353	0.929	0.277	1.465	1.2615	0.112	1.3795	0.258333
gi|118150593|ref|NM_001077789.1| Danio rerio zgc:154077 (zgc:154077), mRNA	0	0.563	0.50875	0.3465	0.6905	0.1955	0.573	0.312	0.434	0.903	0.884	0	0.133	0.256	0	0.29	0.791	2.428	0.2235	0	0.407	0.717667
gi|118150595|ref|NM_001077790.1| Danio rerio zgc:152965 (zgc:152965), mRNA	21.323	18.266	1.1865	6.4525	9.8665	8.80625	19.863	15.422	16.668	23.442	10.891	24.948	5.364	18.214	18.639	8.486	5.266	12.027	18.922	13.462	5.9705	9.9
gi|118150597|ref|NM_001077791.1| Danio rerio zgc:153615 (zgc:153615), mRNA	0.555	0	0	0	0	0	0	0	0	0	0	0	0	0	0	0	0	0	0	0	0	1.80767
gi|118150599|ref|NM_001077792.1| Danio rerio zgc:154079 (zgc:154079), mRNA	0.657	0.639	0.14725	0.685	1.7	0.5395	1.358	2.015	0.072	1.875	2.476	0.103	0.132	0.255	0.41	0.288	0.214	0.638	0.457	1.378	0.709	1.56467
gi|118150601|ref|NM_001077793.1| Danio rerio zgc:154169 (zgc:154169), mRNA	0	0.169	0.03725	0	0	0	0.046	0	0	0	0	0	0	0.054	0.144	0	0.076	0.3	0	0	0	2.44467
gi|118150605|ref|NM_001077795.1| Danio rerio zgc:153492 (zgc:153492), mRNA	0	0.089	0	0	0.163	0.02125	0.049	0.173	0	0	0	0	0.148	0	0	0	0	0.079	0	0	0.099	0.871
gi|118150609|ref|NM_001077796.1| Danio rerio lin-52 homolog (C. elegans) (lin52), mRNA	0	0.624	0.18975	0	0.3235	0.12375	0.684	0	0.336	0.255	0.748	0.32	0.207	0.637	1.067	0.899	0.446	0.997	0.546	0.115	0.276	0.897333
gi|118150615|ref|NM_001077803.1| Danio rerio glycerol kinase 5 (putative) (gk5), mRNA	0.441	0.939	0.11825	0.459	0.242	0.205	0.404	0.39	0.241	0.137	0.469	0	0.555	0.342	0.688	0.483	0.18	1.19	0.214	0.945	0.2515	4.813
gi|118150621|ref|NM_001077801.1| Danio rerio growth arrest-specific 1b (gas1b), mRNA	0.222	0.404	0.21875	0.232	0.3495	0.43125	0.739	0.392	0.242	1.513	2.02	1.297	1.785	3.007	0.461	0.971	3.795	1.675	0.669	0.0185	1.4225	3.467
gi|118150623|ref|NM_001077806.1| Danio rerio family with sequence similarity 46, member Ba (fam46ba), mRNA	2.856	17.425	9.89875	0.464	3.447	1.739	11.652	3.367	0.753	4.215	1.914	0.538	0.099	0.725	1.331	0.539	2.997	6.164	2.273	1.999	2.523	5.35367
gi|118150625|ref|NM_001077802.1| Danio rerio isoprenoid synthase domain containing (ispd), mRNA	10.76	16.056	15.1155	17.1425	26.107	37.4183	25.359	15.449	18.05	23.659	24.24	4.12	12.598	12.128	4.677	21.84	27.532	31.348	35.9245	10.366	31.457	3.48333
gi|118150627|ref|NM_001077805.1| Danio rerio oxysterol binding protein-like 9 (osbpl9), mRNA	0.412	0.564	0.4325	1.1025	0.7795	0.22375	1.339	1.579	0.9	2.237	3.255	0	0.518	0.958	0.428	1.015	3.472	2.168	0.488	1.141	3.2855	2.979
gi|118197266|ref|NM_001078169.1| Danio rerio sulfotransferase family 2, cytosolic sulfotransferase 2 (sult2st2), mRNA	3.926	2.387	0.15525	0	3.212	1.2015	1.962	1.388	0.214	1.704	2.146	1.225	0.395	1.673	8.571	4.297	5.974	2.118	1.8365	2.51	0.4235	0.550667
gi|118601078|ref|NM_001077211.2| Danio rerio mechanistic target of rapamycin (serine/threonine kinase) (mtor), mRNA	1.402	2.119	1.38725	1.0465	1.8875	2.10375	2.336	2.03	1.05	1.888	1.703	1.406	1.371	1.739	1.416	1.491	0.544	1.232	2.2915	0.866	1.0535	1.644
gi|118601187|ref|NM_001044905.2| Danio rerio tetratricopeptide repeat domain 9B (ttc9b), mRNA	0.759	0.769	0.06	0	0	0	0	0	0	0.157	0.308	0	0	0	2.632	0.554	0.413	0.273	0.2065	0	0.273	0
gi|118722317|ref|NM_001079656.1| Danio rerio sphingosine-1-phosphate receptor 5b (s1pr5b), mRNA	0.476	0.145	0.015	0	0	0.0745	0.159	0	0	0.148	0	0	0	0.277	0	0	0.129	0	1.288	2.9945	0.126	0.0306667
gi|118722319|ref|NM_001079658.1| Danio rerio zgc:158320 (zgc:158320), mRNA	0	1.171	0.31925	0.645	3.428	1.71225	0.733	0.973	0.451	1.877	2.005	46.567	89.969	77.926	29.172	48.782	1.046	0	0.796	0	0.3305	1.305
gi|118722321|ref|NM_001079659.1| Danio rerio zgc:158417 (zgc:158417), mRNA	0	0	0	0	0	0	0	0	0	0	0	0	0	0.083	0	0	0	0.231	0	0	0	0.0836667
gi|118722323|ref|NM_001079657.1| Danio rerio zgc:158340 (zgc:158340), mRNA	0.769	0.187	0.59275	0.3605	0.121	0	0.051	0	0.084	0	0	0	1.547	0.06	1.279	0.337	0	0	0.149	0.4105	0.3915	0
gi|118722325|ref|NM_001079661.1| Danio rerio family with sequence similarity 26, member F (fam26f), mRNA	0	0	0	0	0	0	0	0	0.125	0	0	0	0	0.088	0	0	0	0	0	0	0.1535	0.201
gi|118722327|ref|NM_001079663.1| Danio rerio zgc:158321 (zgc:158321), mRNA	7.563	8.515	9.91225	6.8665	7.653	5.40375	9.428	8.254	10.093	6.775	5.785	5.899	2.255	4.993	2.621	4.599	17.352	5.441	7.6485	4.5875	8.4815	1.37333
gi|118722329|ref|NM_001007183.2| Danio rerio protein arginine methyltransferase 5 (prmt5), mRNA	3.132	6.044	1.3735	3.6265	3.5675	3.0115	5.4	5.136	2.379	3.125	3.226	0.85	5.755	5.277	9.768	4.919	3.034	7.274	2.096	1.687	0.912	13.6497
gi|118722331|ref|NM_001079660.1| Danio rerio RAB36, member RAS oncogene family (rab36), mRNA	0	0.17	0	0	0	0	0.28	0	0	0	0	0.654	0.281	1.95	7.268	1.53	0.152	0.151	0	0	0	0.181667
gi|118722333|ref|NM_001079665.1| Danio rerio sialidase 3.1 (neu3.1), mRNA	0	0	0.0135	0	0	0	0	0	0	0.132	0	0	0	0	0	0	0	0	0.2675	0	0	0.675333
gi|118722335|ref|NM_001079662.1| Danio rerio family with sequence similarity 98, member B (fam98b), mRNA	8.585	12.177	7.85575	6.4415	15.3465	8.14875	10.229	16.864	7.669	11.939	9.006	4.261	17.276	11.088	6.49	9.965	4.523	2.105	14.9995	0.0855	9.156	2.464
gi|118722339|ref|NM_001079664.1| Danio rerio Rab interacting lysosomal protein-like 1 (rilpl1), mRNA	2.239	1.179	0.46225	1.131	1.927	1.1505	0.945	0.879	0.815	1.759	0.816	0	1.201	0.173	0.155	1.633	0.568	0.725	1.0425	0.3635	0.939	0.523
gi|118766322|ref|NM_131256.2| Danio rerio nuclear receptor subfamily 6, group A, member 1a (nr6a1a), mRNA	0.799	0.243	0	0	0	0	0	0	0.109	0.371	0	5.607	0	0	0	0	0.434	2.047	0	0	0	0
gi|118918375|ref|NM_001007180.3| Danio rerio si:ch211-14a17.7 (si:ch211-14a17.7), mRNA	0.305	0.185	0.0265	0	0	0	0.101	0	0.166	0	0	0	0	0	0	0	0	0	0	0	0.0805	103.466
gi|118918378|ref|NM_001079677.1| Danio rerio abhydrolase domain containing 2b (abhd2b), mRNA	0.344	0.313	0.2265	0.18	0.1095	0.05375	0.172	0	0.938	0	0	0	0	0	0	0	0.28	1.39	0	0.294	0.07	0.284667
gi|118918380|ref|NM_001079678.1| Danio rerio mind bomb 2 (mib2), mRNA	3.693	0.499	1.652	0.215	3.8535	1.4995	0.41	1.572	1.288	1.145	1.682	2.24	2.271	0.358	0	0	0.223	0.055	3.5515	0	2.3115	0.0886667
gi|118918382|ref|NM_001079679.1| Danio rerio melanophilin b (mlphb), mRNA	6.026	51.779	17.3938	248.025	254.642	130.946	46.67	348.57	450.862	113.421	397.938	0.127	2.622	1.01	0.339	2.852	23.715	15.2	0	0	0.861	0
gi|118918384|ref|NM_001079681.1| Danio rerio cytokine receptor family member b1 (crfb1), mRNA	0	0.386	0.0375	0	0	0	1.164	0.187	0.173	0.197	0.096	0.371	0	0.492	0.495	0	0.518	1.627	0.1545	0	0.042	1.424
gi|118918386|ref|NM_001079680.1| Danio rerio zgc:153721 (zgc:153721), mRNA	0	0	0	0	0.0755	0	0	0	0	0	0.098	0	0	0	0	0	0	0	0	0	0	0.292667
gi|118918392|ref|NM_001079683.1| Danio rerio zgc:153683 (zgc:153683), mRNA	1.074	0.653	0.31175	0.77	1.6325	0.59625	0.85	2.057	0.586	0.583	1.386	0.105	0.135	0.676	0.279	0.588	0.219	0.435	0.388	2.5435	0.18	3.26533
gi|119226209|ref|NM_001079703.1| Danio rerio tyrosyl-DNA phosphodiesterase 2b (tdp2b), mRNA	0.701	5.543	0.4965	3.5385	3.6895	1.22925	7.323	19.839	7.913	4.35	10.224	4.377	4.705	7.972	6.805	9.212	1.906	4.541	4.5325	0	4.141	15.3403
gi|119226212|ref|NM_001079702.1| Danio rerio phosphatidylserine decarboxylase (pisd), mRNA	7.645	23.486	2.827	2.6315	4.1575	1.39925	21.334	16.25	15.427	10.667	98.916	1.065	7.28	4.02	20.293	15.539	8.011	69.452	5.4865	0.864	19.333	1.38433
gi|119226214|ref|NM_001079704.1| Danio rerio zgc:198195 (zgc:198195), mRNA	0	0	0.0125	0	0	0	0.066	0.232	0.108	0	0.12	0	0	0.305	0.205	0	1.499	0	0.027	0	0	1.39433
gi|119310171|ref|NM_131302.2| Danio rerio notch homolog 1b (notch1b), mRNA	1.044	0.026	0	0	0.014	0.0795	0.043	0	0	0.081	0.053	0.068	0.788	0.118	1.176	0.143	0.047	0	0.75	0.3855	0	0.114333
gi|119310173|ref|NM_131586.2| Danio rerio vertebrate ancient long opsin a (valopa), mRNA	0	0	0.51475	0	0.953	0.3925	0.847	0.214	0.198	1.914	0.882	0.142	0	0.07	0	0.199	0.099	1.665	3.4205	1.0285	1.443	0.187333
gi|119310174|ref|NM_131099.2| Danio rerio forkhead box N4 (foxn4), mRNA	15.475	0.224	0.18325	0.193	0.175	0.534	1.392	0.145	0.536	0.838	0.149	0	0	0.333	0	0.134	0.067	0.199	9.3815	11.0525	0.7875	0.401
gi|119310175|ref|NM_001025550.2| Danio rerio si:ch211-261f7.2 (si:ch211-261f7.2), mRNA	1.393	2.156	0.19625	0.1325	0.9055	0.65425	1.604	0.448	0.069	0.314	0.539	0.296	0.255	0.442	0.263	0.277	1.032	1.504	2.107	0.7555	1.1685	0.919
gi|119310176|ref|NM_131635.2| Danio rerio fibroblast growth factor 4 (fgf4), mRNA	0	0	0	0	0	0	0	0	0	0	0	0	0	0	0	0	0	0	0	0	0	0.297333
gi|119360307|ref|NM_001079805.1| Danio rerio coagulation factor II (thrombin) receptor-like 1.1 (f2rl1.1), mRNA	0.422	0.385	0	0	0.3325	0	0	0.249	0.115	0.131	0.128	0	0	0	0	0	0	0.684	0	0	0	8.433
gi|119392102|ref|NM_001079816.1| Danio rerio mix-type homeobox gene 2 (mxtx2), mRNA	0	0	0	0	0	0	0.331	0	0	0	0	0	0	0	0	0	0	0.134	0	0	0	0
gi|119508803|ref|NM_001013270.2| Danio rerio v-yes-1 Yamaguchi sarcoma viral oncogene homolog 1 (yes1), mRNA	0.447	2.266	0.514	1.052	2.8975	1.1205	2.186	6.59	0.651	3.976	6.113	1.396	0.825	1.791	0.93	2.448	2.593	2.011	1.01	0.194	0.689	5.84967
gi|119637850|ref|NM_001079826.1| Danio rerio BH3 interacting domain death agonist (bida), mRNA	0	2.055	0.1535	0	0.3325	0.51225	6.475	4.979	1.153	2.096	2.309	2.307	0.425	1.964	0	1.387	1.377	0.912	2.878	2.06	1.411	1.65033
gi|119672889|ref|NM_001017840.2| Danio rerio zgc:110179 (zgc:110179), mRNA	1.336	1.894	1.05825	0	2.74	0.9025	2.225	2.099	0.972	1.104	0.811	0	0.448	1.207	2.777	1.949	12.821	0.24	2.972	0	3.1635	0
gi|119672893|ref|NM_001079834.1| Danio rerio wingless-type MMTV integration site family, member 5a (wnt5a), mRNA	0	0	0	0	0	0	0	0	0	0	0	0	0	0	0	0	0	0	0	0	0	0.252333
gi|119672897|ref|NM_001079833.1| Danio rerio IL-6 subfamily cytokine M17 (m17), mRNA	0	0	0	0	0	0	0	0	0	0	0	2.517	0	0	0	0	0	0	0	0.228	0.122	0
gi|119672900|ref|NM_001079835.1| Danio rerio delta-like 4 (Drosophila) (dll4), mRNA	0.335	0	0.29275	0.0585	0.228	0	0.074	0	0.061	0.069	0.271	0	0	0	0	0	0.121	0.662	0.0625	0	0.0455	0.580333
gi|119672902|ref|NM_001079836.1| Danio rerio si:dkey-15j16.2 (si:dkey-15j16.2), mRNA	4.03	9.91	15.6502	17.351	30.65	15.5725	10.559	16.191	32.5	4.998	15.464	0.857	15.481	6.6	5.331	11.828	25.977	9.685	16.6715	1.382	32.7	8.981
gi|119672904|ref|NM_001020824.1| Danio rerio zgc:110680 (zgc:110680), mRNA	4.814	17.284	4.131	3.1435	14.884	3.09075	16.643	19.149	5.503	10.822	8.132	13.142	7.568	17.603	9.696	15.971	13.814	4.626	6.5895	2.657	4.794	5.61733
gi|119943081|ref|NM_001079853.1| Danio rerio cytochrome P450 CYP2X12 (cyp2x12), mRNA	0	0	0	0	0	0	0	0	0	0	0	0	0	0	0	0	0	0	0	0	0	0.072
gi|119943083|ref|NM_001079852.1| Danio rerio cytochrome P450 CYP2AA3v1 (cyp2aa3v1), mRNA	0	0	0.16175	0	0	0	0	0	0	0	0	0	0	0	0	0	0	0	0	0	0	0.412333
gi|119943088|ref|NM_001079851.1| Danio rerio cytochrome P450, family 2, subfamily AA, polypeptide 9 (cyp2aa9), mRNA	0	0	0.05775	0	0	0	0	0	0	0	0	0	0	0	0	0	0	0.116	0	0	0	0.0143333
gi|119943122|ref|NM_001079861.1| Danio rerio apolipoprotein A-IV (apoa4), mRNA	3.925	0.511	0	0	1.768	0.0405	0.467	0	0.153	0.348	0	0	0.282	0	0	0	55.145	0.303	4.1675	34.5605	2.701	105.743
gi|119943149|ref|NM_131385.2| Danio rerio recombination activating gene 2 (rag2), mRNA	1.287	0.391	0.47625	2.1125	1.5505	0.42475	0.643	0.455	2.038	0.878	1.72	0.402	1.554	0.998	0.937	1.832	0.49	1.598	2.5785	1.209	1.3765	1.95167
gi|120300947|ref|NM_001079868.1| Danio rerio hypocretin (orexin) receptor 2 (hcrtr2), mRNA	0	0	0	0	0	0	0	0	0	0	0.162	0	0	0	0	0	0	0	0	0	0	0
gi|120474978|ref|NM_207637.2| Danio rerio adrenergic, alpha-2A-, receptor (adra2a), mRNA	0.634	1.079	0.093	0.0665	0	0	1.731	0.747	0.069	0.157	0.077	1.087	0.255	1.08	1.581	0.139	1.102	3.692	0.086	0	0	0
gi|120586959|ref|NM_131704.1| Danio rerio major histocompatibility complex class I UDA gene (mhc1uda), mRNA	0.132	0.4	0	0	0	0.019	0.483	0.155	0	0.327	0.24	0.924	0.132	0.255	0.684	0.144	0.358	0.852	0.217	0.0215	0.158	16.2887
gi|120952589|ref|NM_001044900.1| Danio rerio immunoglobulin mu binding protein 2, like (ighmbp2l), mRNA	0.098	0.06	0.0465	0	0	0.06825	0.164	0	0.161	0.244	0.06	0	0	0	0	0.108	0	0	0.7955	0	0.2105	1.507
gi|120952594|ref|NM_205758.2| Danio rerio poly(A) polymerase beta (testis specific) (papolb), mRNA	15.442	13.13	7.09725	6.86	7.262	13.5617	11.691	11.519	10.191	10.243	4.511	6.022	7.08	12.572	7.721	11.766	6.373	6.644	16.1775	4	12.0095	2.98433
gi|121247438|ref|NM_001079934.1| Danio rerio zgc:152698 (zgc:152698), mRNA	1.415	0	0.02225	0	0	0	0.354	0	0	0	0	0	0	0.685	0	1.936	0.192	0	0	0	0	0
gi|121582315|ref|NM_001079958.1| Danio rerio adducin 1 (alpha) (add1), mRNA	5.798	7.326	4.7585	6.6445	16.8345	10.3763	7.576	17.82	5.213	9.377	10.426	11.173	12.468	8.678	9.218	6.595	7.969	8.341	8.9615	13.962	6.7435	4.70633
gi|121582317|ref|NM_001079961.1| Danio rerio gametogenetin binding protein 2 (ggnbp2), mRNA	70.315	35.504	31.488	5.9515	28.779	14.8395	47.443	25.513	33.788	38.112	18.178	51.22	27.043	35.632	27.033	34.187	26.129	32.685	42.7635	30.3085	24.0175	6.193
gi|121582319|ref|NM_001079955.1| Danio rerio death inducer-obliterator 1 (dido1), mRNA	6.642	4.342	7.0775	0.556	3.092	2.203	4.009	4.431	1.368	3.575	3.197	4.399	1.387	5.098	8.598	4.526	2.86	7.437	5.049	3.9025	6.218	5.41367
gi|121582321|ref|NM_001079951.1| Danio rerio CCR4-NOT transcription complex, subunit 1 (cnot1), mRNA	15.666	15.948	8.569	11.426	12.267	7.5585	14.373	25.879	7.588	19.533	21.328	8.563	23.21	14.53	12.139	9.361	10.211	8.053	17.3885	11.3695	12.7305	6.97933
gi|121582335|ref|NM_001079945.1| Danio rerio si:rp71-15k1.1 (si:rp71-15k1.1), mRNA	0	0	0.074	0	0	0	0	0	0.196	0	0	0.561	0	0	0	0	0	0	0	0	0.073	6.59367
gi|121582337|ref|NM_001079944.1| Danio rerio si:dkey-236e20.6 (si:dkey-236e20.6), mRNA	3.882	1.475	0.94075	2.4685	3.0595	2.30025	3.639	7.15	4.902	4.515	3.537	4.164	0.977	3.855	1.766	3.718	1.714	2.618	1.8835	1.783	2.753	18.7677
gi|121582341|ref|NM_001079971.1| Danio rerio zgc:153912 (zgc:153912), mRNA	0.579	2.62	0.28625	0.2855	0.6695	0.29225	2.208	3.184	0.281	3.191	4.376	0.452	1.877	1.396	1.872	1.408	2.551	5.344	1.8225	0.7695	2.004	1.38367
gi|121582343|ref|NM_001079967.1| Danio rerio NEDD4 binding protein 2 (n4bp2), mRNA	0.058	0.141	0.11475	0.061	0.2115	0.0285	0.29	0.205	0.095	0.505	0.424	0	0.117	0.293	0	0.382	0	0	0.2175	0.0385	0.576	2.57933
gi|121582345|ref|NM_001079972.1| Danio rerio ligand dependent nuclear receptor corepressor (lcor), mRNA	2.388	3.581	2.47875	2.7825	2.8945	5.05375	3.501	3.752	1.304	2.567	2.321	2.856	1.281	1.172	1.489	3.136	1.816	4.294	1.3685	0.3725	2.386	0.00366667
gi|121582347|ref|NM_001079957.1| Danio rerio zgc:158432 (zgc:158432), mRNA	0.795	0	0.0795	0	0	0	0	0	0	0	0.161	0	0.533	0.103	0	0	0	0	0	0	0	2.37133
gi|121582349|ref|NM_001079964.1| Danio rerio zgc:154075 (zgc:154075), mRNA	0.182	1.548	0.1735	0.095	0.2015	0.20975	1.091	0.643	0.199	0.564	0.552	0.568	0.183	0.423	0.189	0.796	0.395	1.178	0.1515	0	0.3665	0.255333
gi|121582351|ref|NM_001080038.1| Danio rerio zgc:158343 (zgc:158343), mRNA	16.004	4.865	1.00175	0.1495	0.091	0.40475	6.38	1.01	1.404	1.95	1.562	49.487	1.15	2.879	2.971	2.19	10.715	2.93	12.596	6.2815	2.7635	2.20333
gi|121582353|ref|NM_001080042.1| Danio rerio zgc:158346 (zgc:158346), mRNA	0.283	0.258	4.078	1.291	0.895	1.1205	0.896	0.167	1.776	1.228	0.773	0.552	0	1.206	1.029	1.239	1.153	2.442	0.0575	0	4.9135	0.104667
gi|121582355|ref|NM_001080036.1| Danio rerio tumor protein p53 inducible nuclear protein 1 (tp53inp1), mRNA	59.851	12.217	22.0993	2.794	20.087	20.4773	18.561	8.238	6.44	18.153	21.891	9.03	21.979	18.281	18.847	49.728	21.602	46.904	46.004	24.408	37.758	1.42133
gi|121582359|ref|NM_001080025.1| Danio rerio zgc:158412 (zgc:158412), mRNA	0	0.71	0.01475	0.1225	0	0.52125	2.491	0.275	0	0.29	0.142	0.911	0	2.354	2.914	0	1.269	5.294	0	0	0.062	0.744667
gi|121582363|ref|NM_001080023.1| Danio rerio RAB39B, member RAS oncogene family (rab39b), mRNA	0.318	0.29	0	0.746	0.0745	0	0.265	0.188	0	0.197	0	0	0.961	0.37	1.158	0	0	0.172	0.065	0	0.0645	0.246667
gi|121582365|ref|NM_001080014.1| Danio rerio family with sequence similarity 134, member A (fam134a), mRNA	2.29	2.042	2.49	1.477	1.9535	2.601	2.188	2.159	1.084	3.314	3.06	1.905	1.536	0.887	2.381	2.339	0.83	2.718	2.548	0.659	4.442	1.10067
gi|121582367|ref|NM_001079990.1| Danio rerio dynein, cytoplasmic 1, intermediate chain 1 (dync1i1), mRNA	0.664	0.081	0.088	0	0.0425	0.17325	0.398	0.47	0.073	0.412	0.081	0	0	0	0	0.145	0.361	3.153	0.2605	0.4555	0.303	0.025
gi|121582369|ref|NM_001080003.1| Danio rerio si:ch211-208m1.2 (si:ch211-208m1.2), mRNA	0	0.469	0.3125	0	0.3985	0.02775	0.193	0.228	0.316	0.12	0.938	0.151	0.194	0.299	0	1.057	0.21	0.104	0.562	0.2485	0.283	1.27567
gi|121582371|ref|NM_001079965.1| Danio rerio ADP-dependent glucokinase (adpgk), mRNA	0.727	1.253	0.24325	0.759	1.1665	0.54575	0.929	2.571	0.662	1.729	1.693	1.04	0.122	0.704	0.756	1.724	0.461	1.112	0.793	0.9425	0.9895	2.38
gi|121582373|ref|NM_001079963.1| Danio rerio vascular endothelial zinc finger 1 (vezf1), mRNA	0.622	0.252	0.013	0.651	0.2645	0.4075	0.138	0.488	0.339	0.643	0.126	0	0	0.161	0	0	0	0	0.378	0.034	0.1395	0.909333
gi|121582375|ref|NM_001079969.1| Danio rerio speckle-type POZ protein-like b (spoplb), mRNA	1.427	1.562	2.3225	1.491	5.969	2.29225	3.329	3.869	1.636	4.425	1.474	9.462	7.754	5.917	2.67	7.498	1.086	1.617	3.7495	1.3545	1.665	5.999
gi|121582377|ref|NM_001079979.1| Danio rerio zgc:153913 (zgc:153913), mRNA	0	0	0.03975	0	0	0	0	0.174	0.081	0	0.269	0	0	0	0	0.162	0	0	0	0	0	1.01367
gi|121582379|ref|NM_001079980.1| Danio rerio CD99 molecule (cd99), mRNA	0.746	2.155	0.0885	0	0.2345	0.076	1.617	0.44	1.324	1.041	1.813	1.31	0	1.446	1.358	1.225	1.521	2.718	0.623	0	0.452	10.0057
gi|121582381|ref|NM_001080057.1| Danio rerio zgc:152953 (zgc:152953), mRNA	0.277	0.168	0.02175	0.0485	0.3795	0.05325	0.308	0.218	0.05	0.229	0.056	0.072	0.65	0.179	0	0.606	0.05	0.299	0.0375	0.7515	0.295	4.59267
gi|121582383|ref|NM_001080059.1| Danio rerio glucose-dependent insulinotropic polypeptide (LOC790901), mRNA	0	0	0	0	0	0	0	0	0	0	0	0	0	0	0	0	0	0	0	0	0	0.486
gi|121582389|ref|NM_001080056.1| Danio rerio lysine (K)-specific demethylase 2Aa (kdm2aa), transcript variant 1, mRNA	0.089	0.539	0.32625	0.093	0.394	0.32475	0.266	0	0.387	0.659	0.431	2.143	0.178	0.549	0	0.873	0.048	0.191	0.951	0	0.2615	4.018
gi|121582391|ref|NM_001080058.1| Danio rerio zgc:158291 (zgc:158291), mRNA	1.019	0	0.039	0	0	0	0.097	0	0	0.181	0	0	0	0	0	0	0	0.079	0.345	0.576	0	0.841333
gi|121582451|ref|NM_001080054.1| Danio rerio zinc finger protein 395a (znf395a), mRNA	0	0.691	0.2305	0.1325	1.1355	0.3875	0.884	1.042	1.172	0.392	2.378	1.084	1.017	0.783	0.788	2.35	0.412	2.862	1.4805	0.237	1.9955	23.2647
gi|121582453|ref|NM_001080012.1| Danio rerio hedgehog interacting protein (hhip), mRNA	0	0	0.06575	0	0	0	0.123	0.261	0.04	1.055	2.471	0	0.372	0	0.384	0.081	0.201	0	1.157	0	0.684	1.529
gi|121582457|ref|NM_001079973.1| Danio rerio zgc:158363 (zgc:158363), mRNA	7.842	27.608	9.90875	2.3285	12.005	4.4635	32.514	55.244	5.476	33.706	35.559	17.355	34.133	18.797	25.974	20.96	16.352	18.991	16.8665	11.6535	8.9855	31.849
gi|121583339|ref|NM_001080035.1| Danio rerio zgc:158429 (zgc:158429), mRNA	0	0.122	0.13	0.4705	0.128	0.13925	0.334	0	0	0.498	0.244	0	0	0.389	0	0.439	0.109	1.191	0.0275	0	0.053	8.57833
gi|121583341|ref|NM_001080016.1| Danio rerio solute carrier family 2 (facilitated glucose transporter), member 11-like (slc2a11l), mRNA	1.099	0.191	0.191	0	0.2475	0.13975	0.314	0	0.086	0	0	0.245	0	0	0	0	0.085	0.169	0.329	3.9885	0.083	0.323333
gi|121583576|ref|NM_001079992.1| Danio rerio collagen type XI alpha-2 (col11a2), mRNA	3.745	0.772	0.34175	0	0.05	0.00925	0.402	0	0.069	0.354	0	0.05	0	0.025	0.066	0	0	0.034	1.5025	0.7465	0	0.484
gi|121583580|ref|NM_001080010.1| Danio rerio zgc:158410 (zgc:158410), mRNA	2.118	0.234	0.31	0.2015	0.3035	0	0.128	0	0.42	0	0	0	0	0.224	0.2	0	5.858	0.208	1.121	3.388	0.4115	11.307
gi|121583588|ref|NM_001079962.1| Danio rerio nuclear factor I/A (nfia), mRNA	46.231	44.135	46.031	3.208	14.281	2.4315	25.295	15.887	19.947	15.619	28.583	5.902	20.106	21.212	13.52	11	31.738	42.103	57.9355	10.364	96.2845	0.789
gi|121583644|ref|NM_001080015.1| Danio rerio zgc:154063 (zgc:154063), mRNA	3.119	2.286	0.5445	0.384	2.174	0.86125	1.528	2.703	0.401	3.698	2.452	1.717	4.8	5.616	2.765	4.518	0.598	2.079	4.1965	0.943	1.1915	13.605
gi|121583646|ref|NM_001080027.1| Danio rerio TERF1 (TRF1)-interacting nuclear factor 2 (tinf2), mRNA	5.714	1.645	1.8185	1.886	3.0445	1.5785	1.553	6.912	2.216	1.026	6.667	0	1.967	0.816	2.814	1.975	0.817	3.488	6.992	9.122	3.769	8.25033
gi|121583656|ref|NM_001080037.1| Danio rerio ATPase type 13A2 (atp13a2), mRNA	0.136	0.909	0.239	0.337	0.774	1.26825	1.562	1.121	0.742	0.506	1.362	4.452	1.094	1.264	0.848	1.264	0.554	1.247	0.9215	0.177	0.8105	0.688333
gi|121583658|ref|NM_001080065.1| Danio rerio zgc:158640 (zgc:158640), mRNA	0	0	0	0	0	0	0	0	0	0.92	0	0	0	0	0	0	0.269	0	0.211	0	0	0.207333
gi|121583660|ref|NM_001080089.1| Danio rerio zgc:158276 (zgc:158276), mRNA	3.966	7.349	2.00925	0.8385	2.006	3.28325	5.287	2.226	1.753	2.811	2.065	6.63	5.321	9.587	13.351	9.923	1.539	6.012	1.078	0.604	8.103	1.16
gi|121583666|ref|NM_001080064.1| Danio rerio inositol polyphosphate multikinase b (ipmkb), mRNA	0.375	0.57	0.57425	1.2715	1.034	0.16675	0.937	0.663	1.126	0.465	0.342	1.754	0	1.235	0.195	0.41	1.935	1.82	0.1565	0.6545	0	10.37
gi|121583668|ref|NM_001079946.1| Danio rerio zgc:123178 (zgc:123178), mRNA	13.65	14.011	3.90925	24.054	9.791	42.4165	15.733	15.824	16.126	21.787	14.407	21.992	10.132	16.734	20.004	26.205	40.245	14.487	19.2635	21.111	16.6355	21.3367
gi|121583670|ref|NM_001080006.1| Danio rerio zgc:158337 (zgc:158337), mRNA	14.448	8.543	7.97075	1.599	2.351	2.076	6.793	6.765	3.566	5.401	1.322	4.786	6.373	8.359	3.909	3.033	1.936	2.883	7.0985	1.187	1.9345	0
gi|121583676|ref|NM_001080066.1| Danio rerio zgc:158425 (zgc:158425), mRNA	0	0.224	0	0	0.322	0	0.123	0	0	0.114	0	0	0	0.358	0	0	1.605	0.1	0.3115	0	0.075	2.369
gi|121583678|ref|NM_001080068.1| Danio rerio iduronate 2-sulfatase (ids), mRNA	2.23	1.668	0.82225	0.2695	1.5415	0.80425	2.4	0.606	0.562	1.276	1.667	2.274	0.518	0.199	0	0.188	0.186	0	2.393	1.198	1.652	10.7257
gi|121583680|ref|NM_001080067.1| Danio rerio retinoic acid induced 12 (rai12), mRNA	0.621	3.521	1.8535	8.9025	9.439	5.54625	3.24	2.682	3.049	5.773	5.528	2.097	4.163	2.485	1.075	4.075	1.124	6.919	7.1615	0.116	5.02	1.753
gi|121583686|ref|NM_001080088.1| Danio rerio phytanoyl-CoA 2-hydroxylase interacting protein-like a (phyhipla), mRNA	0.237	0.072	0.16	0.062	0	0	0.118	0.279	0.194	1.691	3.672	0	0	0	0	0	12.494	6.523	1.484	0	8.785	0.139
gi|121583688|ref|NM_001080087.1| Danio rerio si:ch211-287b5.3 (si:ch211-287b5.3), mRNA	2.902	11.996	1.49025	0.304	2.0635	3.083	12.281	10.261	15.843	13.677	10.223	14.712	4.672	11.918	23.228	23.821	7.096	34.913	5.5695	4.427	4.8625	9.88067
gi|121583690|ref|NM_001080070.1| Danio rerio ubiquitin specific peptidase 39 (usp39), mRNA	5.25	4.182	1.218	3.5845	4.9965	2.9305	3.559	4.267	4.249	4.715	1.099	2.824	0.364	2.455	0.753	1.783	1.082	0.293	4.855	3.293	1.5805	7.064
gi|121583692|ref|NM_001080069.1| Danio rerio zgc:158437 (zgc:158437), mRNA	0	0.14	0.0765	0.42	0.693	0.133	0.077	0.272	0	0.286	0.14	0	0	0.179	0	0.253	0	0	0.1255	0	0.1225	0.273333
gi|121583694|ref|NM_001080086.1| Danio rerio zgc:158257 (zgc:158257), mRNA	6.48	7.879	10.3468	8.495	11.387	8.455	11.714	7.828	9.729	7.033	9.052	2.654	9.291	11.675	3.536	10.461	7.394	4.72	9.1145	12.342	7.1355	2.25733
gi|121583696|ref|NM_001080085.1| Danio rerio zgc:158252 (zgc:158252), mRNA	0.173	0.158	0.011	0	0.0405	0	0.346	0.611	0.047	0.268	0.735	0.27	0.522	0.234	0.09	0.189	0.282	1.306	0.0955	0.0285	0.405	3.53267
gi|121583698|ref|NM_001080083.1| Danio rerio zgc:158423 (zgc:158423), mRNA	1.969	3.591	3.02975	3.495	0.8685	1.481	11.153	4.873	7.202	2.808	7.653	0.921	5.745	1.373	3.275	3.017	16.796	5.099	6.958	0.0325	4.1935	0.436333
gi|121583700|ref|NM_001080084.1| Danio rerio zgc:158403 (zgc:158403), mRNA	0	0	0	0	0	0.017	0.039	0	0	0	0	0	0.118	0	0	0	0	0	0.016	0	0.031	6.31733
gi|121583702|ref|NM_001080071.1| Danio rerio zgc:158445 (zgc:158445), mRNA	0	0	0	0	0	0	0	0	0	0	0	0	0	0	0	0	0	0	0.0375	0	0.1125	2.039
gi|121583704|ref|NM_001080074.1| Danio rerio zgc:158316 (zgc:158316), mRNA	1.615	1.57	0.6875	0.801	2.0845	1.736	0.753	0.761	1.851	1.001	1.079	0	1.3	0.063	0.336	0.707	0.614	0.61	2.673	0.33	1.9005	0.195333
gi|121583714|ref|NM_001080072.1| Danio rerio zgc:158267 (zgc:158267), mRNA	8.333	0.675	0.588	2.027	6.8135	5.31025	2.283	2.837	3.639	2.297	4.499	4.477	2.608	1.722	3.272	2.432	1.006	0.999	6.6445	0	2.5525	4.45533
gi|121583716|ref|NM_001080073.1| Danio rerio ring finger protein 115 (rnf115), mRNA	1.157	1.524	0.8665	0.957	3.2785	2.2335	2.442	3.182	0.737	4.306	3.983	3.911	4.657	4.633	1.804	3.588	0.838	1.457	2.564	5.2235	1.4765	6.935
gi|121583718|ref|NM_001080075.1| Danio rerio zgc:158375 (zgc:158375), mRNA	1.175	0.429	0.01475	0	0.2205	0	0.666	0	0	0.51	0	0	0	0.046	0	0	0.192	0	1.4825	0.0855	0.079	0.0653333
gi|121583720|ref|NM_001080077.1| Danio rerio zgc:158427 (zgc:158427), mRNA	0	0	0.048	0	0	0	0	0	0	0	0	0.107	0	0.053	1.144	0.151	0	0	0	0	0	0
gi|121583733|ref|NM_001080078.1| Danio rerio family with sequence similarity 132, member A (fam132a), mRNA	0	1.889	0.53425	0.3485	2.0705	0.16575	3.625	1.832	0.242	7.297	7.821	2.944	0	0.946	1.385	3.159	1.206	7.666	20.3665	2.765	3.928	1.79833
gi|121583735|ref|NM_001080076.1| Danio rerio colony stimulating factor 1b (macrophage) (csf1b), mRNA	0	0	0	0	0	0	0	0	0	0	0	0	0	0.262	0.234	0	0	0	0.1925	0	0	0.440667
gi|121583737|ref|NM_001080081.1| Danio rerio EF-hand calcium binding domain 4A (efcab4a), mRNA	2.23	1.981	0.10025	0	0	0.05375	1.543	0.606	0.094	1.489	1.354	3.746	0.69	1.462	2.139	2.816	2.889	4.996	0.263	0.0285	0.2065	2.57767
gi|121583739|ref|NM_001080082.1| Danio rerio zgc:158299 (zgc:158299), mRNA	0.716	0.979	0.304	0.281	0.7895	0.448	2.326	1.055	0.391	2.997	1.413	0.419	0	1.179	2.419	0.196	0.584	1.545	3.672	1.221	0.598	0.014
gi|121583741|ref|NM_001079978.1| Danio rerio zgc:158309 (zgc:158309), mRNA	45.313	89.718	104.017	84.5465	81.266	152.977	114.494	54.877	85.223	138.449	105.924	23.671	38.692	27.383	20.959	34.353	60.426	95.771	111.832	48.8095	332.572	1.646
gi|121583743|ref|NM_001079987.1| Danio rerio transmembrane protein 41B (tmem41b), mRNA	0	0	0.10125	0.4835	0.133	0.462	0.225	0	0.184	0	0	0	0.17	0	0	0	0.183	0.091	0.2355	0	0.0685	1.67033
gi|121583745|ref|NM_001079976.1| Danio rerio doublesex and mab-3 related transcription factor 2b (dmrt2b), mRNA	0	0	0	0	0	0	0	0	0	0	0	0	0	0	0	0	0	0	0	0	0	0.339667
gi|121583747|ref|NM_001079981.1| Danio rerio isochorismatase domain containing 1 (isoc1), mRNA	0.57	2.514	0.552	0.8175	2.0495	1.1995	4.989	2.857	1.168	3.272	2.425	1.112	0.43	3.536	4.002	2.809	1.24	4.847	1.2235	0.1035	0.5165	3.01267
gi|121583749|ref|NM_001079977.1| Danio rerio 3-hydroxy-3-methylglutaryl-Coenzyme A reductase a (hmgcra), mRNA	0	0	0.0205	0	0	0	0	0	0.047	0	0	0	0	0	0.09	0.095	0.518	0.047	0	0.0145	0	1.32667
gi|121583759|ref|NM_001079983.1| Danio rerio anoctamin 5b (ano5b), mRNA	0.638	0.499	0.18925	0.2615	0.3145	0.33475	0.273	1.29	0.1	0.17	0.277	0.356	0.734	1.201	0	1.797	0.099	0	0.179	1.5265	0.0485	2.89133
gi|121583761|ref|NM_001079982.1| Danio rerio angiogenic factor with G patch and FHA domains 1 (aggf1), mRNA	0.132	0.481	0.0915	0.309	0.2695	0.19125	0.922	1.243	0.072	0.981	0.32	0.72	0.53	0.306	0.959	0.433	0	0.142	0.563	0.4605	0.1745	5.36933
gi|121583763|ref|NM_001079993.1| Danio rerio zgc:153268 (zgc:153268), mRNA	3.468	0.767	2.16775	0.865	0.698	0.3035	1.156	0.743	0.947	0.978	0.862	2.213	3.014	1.344	0.328	1.208	0.428	0.68	0.5905	1.387	0.825	0.221667
gi|121583765|ref|NM_001079994.1| Danio rerio G elongation factor, mitochondrial 1 (gfm1), nuclear gene encoding mitochondrial protein, mRNA	16.02	9.09	28.818	3.938	17.8105	9.116	9.253	20.77	7.143	8.942	6.487	6.456	7.925	7.863	4.025	7.16	3.772	2.881	15.0325	7.747	4.5995	1.05067
gi|121583779|ref|NM_001079950.1| Danio rerio glucocorticoid induced transcript 1 (glcci1), mRNA	5.183	4.876	1.7115	2.0955	2.658	3.25325	5.428	2.473	1.415	4.821	5.846	0.481	2.607	2.439	3.335	2.296	6.236	8.988	4.2725	6.01	5.8955	0.810333
gi|121583785|ref|NM_001079952.1| Danio rerio TNFAIP3 interacting protein 1 (tnip1), mRNA	6.564	2.802	2.24425	0.874	2.6415	1.89825	2.466	2.469	1.449	3.811	1.697	5.556	4.075	0.812	4.21	1.834	0.304	0.603	4.6565	6.1575	3.387	1.58667
gi|121583787|ref|NM_001079954.1| Danio rerio aldehyde dehydrogenase 16 family, member A1 (aldh16a1), mRNA	4.695	8.92	3.85775	7.4375	32.751	28.5735	9.27	33.203	8.779	9.682	18.109	49.807	93.777	80.183	61.986	114.469	9.248	5.383	17.0665	3.365	2.832	2.01667
gi|121583789|ref|NM_001079959.1| Danio rerio neurexin 1b (nrxn1b), mRNA	0.236	1.663	1.2115	0.4915	1.4205	0.3795	1.792	1.946	0.438	2.223	3.496	0.478	1.661	1.097	2.452	2.169	1.769	4.479	1.857	0.597	2.563	3.13767
gi|121583791|ref|NM_001079970.1| Danio rerio neurexin 2a (nrxn2a), mRNA	0.734	0.06	0.0735	0.0255	0.069	0	0.033	0	0.053	0	0.03	0	0.148	0	0	0	0.053	0.291	0.081	0	0.1185	0.486
gi|121583793|ref|NM_001079956.1| Danio rerio pre-B-cell leukemia homeobox interacting protein 1b (pbxip1b), mRNA	1.705	2.592	0.554	0.636	0.742	0.58825	2.374	2.656	1.596	2.115	3.662	0.333	1.532	0.991	1.899	2	1.555	3.154	3.345	4.06	6.564	3.76067
gi|121583795|ref|NM_001079998.1| Danio rerio vestigial like 4 like (vgll4l), mRNA	0.219	0	0	0	0	0	0	0.258	0	0	0	0	0	0	0	0.239	0	0	0	0	0	0.627667
gi|121583797|ref|NM_001079984.1| Danio rerio neurexin 2b (nrxn2b), mRNA	0.405	0	0.116	0.053	0.1595	0.02775	0.051	0	0.055	0.094	0.338	0	0.306	0	0.053	0.111	0.055	0.273	0.3715	0.0165	0.6015	0.075
gi|121583799|ref|NM_001079988.1| Danio rerio induced in neural crest by AP2, 1a (inka1a), mRNA	2.698	0.984	0.43475	0	0.0845	0.05175	0.479	0.212	0.491	0.558	0.655	16.415	34.386	27.389	25.803	31.695	0.782	0.485	2.395	2.667	0.4545	1.62367
gi|121583803|ref|NM_001080020.1| Danio rerio glutamate receptor, metabotropic a (grma), mRNA	9.235	19.837	28.248	14.0225	15.029	32.1385	21.688	8.293	9.507	21.218	9.669	28.195	46.018	36.294	13.531	20.119	8.363	13.191	31.8665	13.033	24.852	0.0973333
gi|121583805|ref|NM_001080011.1| Danio rerio src kinase associated phosphoprotein 1 (skap1), mRNA	0	0	0.00725	0	0.0915	0.03325	0.193	0.136	0	0.072	0.07	0.09	0.116	0	0.12	0	0.189	0.187	0.13	0.057	0.1085	0.893
gi|121583807|ref|NM_001080009.1| Danio rerio neurexin 3a (nrxn3a), mRNA	0.323	0.14	0.01175	0	0.0215	0.0295	0.138	0	0.076	0.029	0	0	0.139	0.018	0	0	0	0.05	0.2705	0.5155	0	0.409
gi|121583809|ref|NM_001080021.1| Danio rerio neurexin 1a (nrxn1a), mRNA	6.46	1.706	2.20025	0.305	2.206	0.7965	2.453	0.25	0.434	3.153	0.579	0	0.053	0.226	0	0.232	1.352	4.457	2.2405	1.5565	0.6945	0.364333
gi|121583811|ref|NM_001080047.1| Danio rerio neurexin 3b (nrxn3b), mRNA	1.068	0.271	0.07725	0.0235	0.0285	0.032	0.742	0.21	0.024	1.242	0.406	0	0	0.121	0.093	0.097	1.693	7.398	0.4965	0	0.2915	0.728
gi|121583813|ref|NM_001080028.1| Danio rerio solute carrier family 16, member 10 (aromatic amino acid transporter) (slc16a10), mRNA	43.459	5.385	2.23575	2.7095	7.1495	3.7545	3.182	6.525	1.813	1.717	0.504	45.557	1.532	3.325	0.144	1.363	22.11	0.523	19.292	274.556	1.507	1.865
gi|121583815|ref|NM_001080041.1| Danio rerio REST corepressor 1 (rcor1), mRNA	0.118	0.43	0.05875	0.276	0.296	0.102	0.51	1.388	0.193	0.365	0.215	0.092	0	0.183	1.102	0.387	0.192	0.763	0.425	0	0.585	21.7457
gi|121583817|ref|NM_001080030.1| Danio rerio si:ch211-216l23.1 (si:ch211-216l23.1), mRNA	1.718	0.763	1.37725	0.2935	0.7205	0.1695	1.123	0.623	0.325	0.574	1.084	0	0	0.333	0.687	0.362	0.826	0.784	2.025	0.592	1.7115	1.70667
gi|121583819|ref|NM_001080092.1| Danio rerio growth hormone releasing hormone (ghrh), mRNA	0	0.203	0	0	0	0	0.111	0	0	0	0	0	0	0	0	0	0	0.36	0	0	0	0.0146667
gi|121583821|ref|NM_131571.2| Danio rerio MAD homolog 3a (Drosophila) (smad3a), mRNA	0.126	0.763	0.10825	0.526	0.139	0.37575	0.586	0.444	0.206	0.389	0.686	0	0	0.049	1.044	0	1.228	1.151	0.4365	0.182	0.4375	1.44933
gi|121583822|ref|NM_194364.2| Danio rerio adrenergic, alpha-2D-, receptor a (adra2da), mRNA	0	0.588	0.68425	2.431	0.6855	0.27625	0.766	0.428	0.594	0.375	0	0	0.487	0	0	0	0.066	0	0	0	0.2115	0.146667
gi|121583824|ref|NM_213528.2| Danio rerio tripartite motif-containing 36 (trim36), mRNA	1.533	0.815	0.326	0.7765	0.6795	0.44675	0.479	0.339	0.575	0.178	0.233	0.075	0.193	0.334	0	0.524	0.677	0.62	0.948	1.818	0.655	6.03267
gi|121583826|ref|NM_130955.2| Danio rerio deltaD (dld), mRNA	3.817	0.122	0.043	0	0.3165	0	0.335	0	0.329	0.374	0	0.157	0	0.234	0.418	0	0.546	0.217	0.433	0	0	0.654333
gi|121583828|ref|NM_001007121.2| Danio rerio 5-hydroxytryptamine (serotonin) receptor 5A like (htr5al), mRNA	0	0.262	0	0	0	0	0.527	0.17	0	0	0.087	0	0	0.502	0.748	0	0.156	0.466	0	0	0	0.108667
gi|121583829|ref|NM_001012616.2| Danio rerio dopamine receptor D4a (drd4a), mRNA	0	0	0.05925	0	0.04	0.057	0.042	0	0	0.155	0.076	0	0	0	0	0	0	0.135	0	0	0.7365	0.131333
gi|121583830|ref|NM_001013351.2| Danio rerio zgc:113159 (zgc:113159), mRNA	0.371	1.279	0.60575	0.324	1.012	0.261	1.113	1.75	0.203	1.611	2.48	2.702	2.116	1.965	1.286	3.656	0.739	0.934	0.586	0.6235	1.1745	18.9557
gi|121583832|ref|NM_001017799.2| Danio rerio zgc:110333 (zgc:110333), mRNA	0.38	0.115	0	0	0	0	0	0	0	0.118	0	0.593	0	0.294	0	0	0	0	0.081	0	0	1.115
gi|121583833|ref|NM_001014310.2| Danio rerio solute carrier family 47, member 1 (slc47a1), mRNA	0.555	10.623	8.64025	8.507	5.8475	5.625	15.343	8.5	11.584	22.191	40.77	0	0.558	0.322	0.144	0.759	17.558	24.093	6.681	0.5255	42.1395	0.617667
gi|121583835|ref|NM_001029951.2| Danio rerio cytochrome P450, family 26, subfamily C, polypeptide 1 (cyp26c1), mRNA	0	0.409	0.4005	0	0.0395	0.02425	0.056	0	0	0.052	0.153	0.066	0.085	0.065	0.262	0.184	0.228	0.045	0.305	0.13	0.284	1.73667
gi|121583837|ref|NM_001020517.2| Danio rerio dihydropyrimidinase-like 2b (dpysl2b), mRNA	0.786	3.742	0.273	1.5705	0.452	1.67725	2.575	2.007	1.073	2.843	1.432	0.715	0.395	1.015	0.272	1.577	3.843	2.191	1.05	0.954	0.3865	0.63
gi|121583838|ref|NM_001025494.2| Danio rerio si:dkey-39a18.1 (si:dkey-39a18.1), mRNA	0	0.374	0	0	0	0	0.718	0.544	0.084	0.191	0	0.36	0	0.715	1.439	0	0.167	0.664	0	0	0	0.141333
gi|121583840|ref|NM_001045485.2| Danio rerio phosphatidylinositol 4-kinase type 2 beta (pi4k2b), mRNA	2.952	2.735	2.63525	5.6755	9.143	4.78775	2.717	22.534	3.531	3.487	13.662	4.277	11.882	4.249	7.453	5.078	1.451	1.517	1.8225	0.1015	0.7955	4.394
gi|121583843|ref|NM_001040341.2| Danio rerio ataxin 7-like 3 (atxn7l3), transcript variant 2, mRNA	1.05	0.274	0.09	0	0.2845	0.1295	0.6	0.707	0.082	0.093	0.091	0.468	1.057	0.116	0	0.328	0.082	0.162	0.061	0	0.2415	3.138
gi|121583845|ref|NM_001044341.2| Danio rerio lysophosphatidylcholine acyltransferase 1 (lpcat1), mRNA	0.987	1	0.4585	0.73	0.9595	1.76125	1.26	5.62	0.898	2.142	0.999	2.052	11.582	18.668	28.375	26.636	0.983	0.089	0.8615	0	0	4.46333
gi|121583870|ref|NM_001045008.1| Danio rerio si:ch211-129c21.1 (si:ch211-129c21.1), mRNA	1.415	0	0.018	0	0	0.0575	0	0	0	0	0.086	0	0	0.055	0	0.155	0.154	0	0.7495	0	0	5.03133
gi|121583878|ref|NM_001080079.1| Danio rerio mitogen-activated protein kinase-activated protein kinase 3 (mapkapk3), mRNA	0.991	0.201	0.4645	1.034	0.623	0.61225	0.275	0.584	0.18	0.615	0.401	0.773	0	0	0.172	0.543	0.539	1.605	0	1.416	0.444	0.779333
gi|121583882|ref|NM_001079996.1| Danio rerio cytochrome P450, family 4, subfamily V, polypeptide 7 (cyp4v7), mRNA	0	0	0.0195	0	0	0.02275	0.048	0	0.04	0.135	0	0	0	0	0	0.159	0	0	0.0195	0.1295	0.204	1.931
gi|121583884|ref|NM_001079999.1| Danio rerio zgc:154088 (zgc:154088), mRNA	0	0.324	0.53125	0.093	0.1135	0.232	0.829	0.419	0.388	2.754	5.502	0	0	0.275	0	0.583	2.509	2.683	0.6685	0.2165	4.156	1.30767
gi|121583886|ref|NM_001080000.1| Danio rerio zgc:152863 (zgc:152863), mRNA	0.615	2.494	1.272	1.2835	3.918	1.12525	2.939	0.967	2.351	3.434	2.741	2.08	3.302	0.636	0	0.224	1.003	0.885	2.054	0	8.436	3.92867
gi|121583888|ref|NM_001079997.1| Danio rerio zgc:154046 (zgc:154046), mRNA	0	0.566	0.479	0	0.7985	0.115	1.241	0.784	0.436	0.825	0.565	2.904	3.88	4.174	4.424	4.075	0.578	0.646	1.683	0.355	0.663	1.53467
gi|121583896|ref|NM_001080001.1| Danio rerio zgc:153955 (zgc:153955), mRNA	3.43	1.832	1.94225	3.8745	4.813	1.14475	2.909	2.082	1.021	5.865	10.479	0	0.523	0.201	0	0.228	5.139	2.243	2.8115	1.507	5.201	1.248
gi|121583898|ref|NM_001080002.1| Danio rerio NAD kinase b (nadkb), mRNA	2.123	1.844	2.068	3.5205	4.077	5.83675	2.628	3.575	1.987	3.198	1.934	5.914	5.035	4.583	0.315	3.983	2.472	1.964	3.243	4.2275	2.2995	5.57533
gi|121583901|ref|NM_001080053.1| Danio rerio zgc:158260 (zgc:158260), mRNA	0	0	0	0	0	0	0	0	0	0	0	0	0	0	0	0	0	0	0	0	0	0
gi|121583903|ref|NM_001080055.1| Danio rerio lysophosphatidic acid receptor 6 (lpar6), mRNA	0.442	0.806	0.08575	0.5765	1.0695	0.336	0.982	2.083	0.08	0.548	0.268	16.085	48.465	43.661	19.293	27.729	1.601	0.079	1.498	3.606	0.216	0.454667
gi|121583913|ref|NM_001080051.1| Danio rerio zgc:153573 (zgc:153573), mRNA	2.645	0.715	0.208	0.0515	0.031	0.06475	0.979	0.462	0.16	2.005	2.023	0.458	0.099	0.228	1.324	1.394	20.599	12.367	1.285	0.1035	1.077	0.0563333
gi|121583915|ref|NM_001080052.1| Danio rerio eyes absent homolog 3 (eya3), mRNA	1.029	0.5	0.8395	0.1615	0.666	0.12575	0.24	0.364	0.169	0.064	0.687	0	0	0.199	0.107	0.788	0.447	0.278	0.6885	0.4445	0.3585	2.18733
gi|121583917|ref|NM_001080050.1| Danio rerio RAD21-like 1 (S. pombe) (rad21l1), mRNA	0.307	0	0	0	0	0	0.154	0	0	0.19	0	0	0	0	0	0	0	0.166	0	0	0	3.276
gi|121583925|ref|NM_001080048.1| Danio rerio regulatory factor X, 3 (influences HLA class II expression) (rfx3), mRNA	3.031	0.369	2.1125	0.127	0.4435	0.109	1.01	1	0.463	1.504	0.589	0.662	0.732	0.423	0.378	0.133	0.198	1.308	2.6355	1.4905	2.1425	1.00067
gi|121583927|ref|NM_001080046.1| Danio rerio G protein-coupled receptor 107 (gpr107), mRNA	1.315	2.479	2.654	1.099	2.3445	2.7405	2.717	2.946	1.436	2.203	2.796	0.616	1.985	2.803	1.778	3.599	2.216	2.555	4.2735	0.0435	2.9595	8.97767
gi|121583933|ref|NM_001080045.1| Danio rerio zgc:153516 (zgc:153516), mRNA	0.388	0.236	0.54275	1.82	2.019	3.73	1.248	1.37	0.494	1.763	1.726	0.403	4.289	3.103	0.94	5.938	0.772	2.509	1.8025	0.0215	1.3815	0.820667
gi|121583937|ref|NM_001018156.1| Danio rerio inhibin, beta Ab (inhbab), mRNA	0	0	0.05625	0.06	0	0	0.038	0	0	0.143	0.209	0.09	0	0.089	0	0	0	0	0.0155	0	0.108	0.0393333
gi|121583939|ref|NM_001080039.1| Danio rerio methyltransferase like 7A (mettl7a), mRNA	0	0	0	0	0	0.037	0.061	0.215	0	0.113	0.221	0	0	0	0	0	0	0.098	0	0	0.3185	9.22467
gi|121583941|ref|NM_001080043.1| Danio rerio zgc:153790 (zgc:153790), mRNA	2.394	1.601	2.16875	1.31	1.0985	0.59575	1.316	0.564	0.784	1.262	0.582	0.934	2.529	1.252	0.124	0.524	0.78	1.614	1.347	0	0.4145	0.713667
gi|121583943|ref|NM_001080080.1| Danio rerio periphilin 1 (pphln1), mRNA	6.366	7.434	5.21725	13.367	13.102	5.37125	9.769	10.07	9.237	5.195	5.087	2.221	11.799	8.568	0.522	7.701	4.551	6.507	8.661	1.4465	8.951	5.28033
gi|121583945|ref|NM_001080032.1| Danio rerio zgc:153916 (zgc:153916), mRNA	1.56	1.581	2.08225	1.085	3.37	0.76	1.848	1.226	0.568	2.15	1.053	1.487	2.267	0.269	3.243	1.138	0.471	1.309	0.3665	0	2.4175	1.202
gi|121583949|ref|NM_001080029.1| Danio rerio arrestin domain containing 3a (arrdc3a), mRNA	0.188	0.458	0.412	0.859	0.7115	0.863	2.445	1.774	1.233	4.842	4	0.954	0.663	0.765	0.685	1.75	1.738	5.989	2.9815	0.245	6.171	1.18133
gi|121583951|ref|NM_001080022.1| Danio rerio myosin regulatory light chain interacting protein b (mylipb), mRNA	0.353	1.394	1.1325	1.8385	1.4765	1.86375	5.819	4.366	1.734	6.564	3.536	6.742	18.992	6.767	10.819	8.109	8.531	3.046	4.8	1.901	1.182	0.638
gi|121583953|ref|NM_001080024.1| Danio rerio RNA binding motif protein 46 (rbm46), mRNA	0	0.298	0.02075	0.0855	0	0	0.49	0	0	0.608	0.198	0.127	0	0.57	0.17	0	0.089	1.057	0	0	0.9445	4.11167
gi|121583955|ref|NM_001080026.1| Danio rerio zgc:153083 (zgc:153083), mRNA	0.415	0	0.013	0	0.296	0.19	0.207	0.245	0.227	0	0.252	0	0	0.241	0	0.227	0.113	0.448	0.459	0	0.169	1.937
gi|121583957|ref|NM_001080019.1| Danio rerio G protein-coupled receptor 146 (gpr146), mRNA	0.632	0.768	0.6265	1.2095	1.0625	1.66	0.947	0.868	0.69	1.828	1.726	0.082	0.635	0.163	0.328	0.115	3.203	2.499	0.8825	0.9295	3.5365	0.928333
gi|121583959|ref|NM_001080018.1| Danio rerio zgc:153779 (zgc:153779), mRNA	0.86	0.523	0	0	0	0.10625	0.164	0.29	0	0	0.075	0.863	0	0	0.128	0	0.267	0	1.164	0.3195	0.215	0.122667
gi|121583961|ref|NM_001080013.1| Danio rerio ADNP homeobox 2b (adnp2b), mRNA	1.491	1.36	0.35625	0.999	1.327	1.048	1.677	1.318	0.356	1.618	1.472	0.727	1.969	1.806	0.388	3.264	1.215	4.726	3.4815	0.501	0.8995	7.37167
gi|121583963|ref|NM_001080008.1| Danio rerio zgc:153972 (zgc:153972), mRNA	1.169	1.847	3.33925	1.282	2.3765	1.50025	2.336	3.168	1.595	2.029	2.129	1.732	2.587	4.166	2.308	2.558	6.603	3.657	3.114	3.4845	1.8155	3.523
gi|121583965|ref|NM_001080007.1| Danio rerio calpain 5a (capn5a), mRNA	0.392	0.159	0	0.238	0.287	0.5115	0.087	1.388	0.071	0.243	0.636	0	1.053	0.101	0	0	0	0	0.6855	0	0	1.37433
gi|121583967|ref|NM_001080017.1| Danio rerio tyrosine kinase, non-receptor, 2b (tnk2b), mRNA	0.373	0.076	0.041	0	0	0	0.248	0	0	0	0	0.097	0	0.193	0.646	0	0.067	0.201	0.258	0.962	0.1165	2.312
gi|121583969|ref|NM_001080004.1| Danio rerio zgc:154006 (zgc:154006), mRNA	0	0.108	0.01125	0	0	0.0725	0.059	0	0	0.111	0	0	0	0.76	0	0.78	0	0	0	0	0.479	0.159667
gi|121583971|ref|NM_001080005.1| Danio rerio zgc:153953 (zgc:153953), mRNA	1.405	1.196	1.91025	0.5495	1.7975	1.9555	3.089	2.483	1.457	3.049	2.73	1.315	1.696	2.667	1.606	4.458	7.327	5.835	3.296	0.1015	2.5995	0.215667
gi|121583981|ref|NM_001079974.1| Danio rerio HAUS augmin-like complex, subunit 6 (haus6), mRNA	0.345	0.28	0.00725	0.2095	0.164	0	0.269	0.271	0	0.143	0	0.18	0	0.134	0.479	0.252	0	0.124	0.0625	0	0	31.1203
gi|121583985|ref|NM_001079966.1| Danio rerio 5'-nucleotidase, cytosolic IIb (nt5c2b), mRNA	7.264	6.676	7.51	3.4835	7.373	7.99775	8.557	13.341	5.534	10.582	10.056	0.132	2.21	1.244	2.283	1.109	12.209	10.117	9.131	0.946	13.578	1.294
gi|122114539|ref|NM_001080168.1| Danio rerio tripartite motif-containing 3b (trim3b), mRNA	0.741	0.7	0.8425	0.1295	0.545	0.55275	0.96	1.843	0.404	1.837	7.598	0.642	1.159	1.276	2.053	1.351	4.069	3.508	1.685	0.6725	3.6965	1.03533
gi|122114541|ref|NM_001080169.1| Danio rerio ubinuclein 2 (ubn2), mRNA	0.806	0.449	0.9345	0.6315	1.316	2.05725	1.299	0.475	0.917	0.583	1.102	1.939	1.149	2.161	1.676	3.309	0.694	2.175	0.8855	0.529	0.5485	3.59033
gi|122114546|ref|NM_001080170.1| Danio rerio zgc:158452 (zgc:158452), mRNA	6.874	3.405	7.011	2.358	7.022	7.0245	6.702	3.601	4.969	5.171	5.296	3.773	2.754	4.809	5.822	7.036	4.945	1.786	16.7425	4.186	7.1155	1.26633
gi|122114548|ref|NM_001080173.1| Danio rerio surfeit 1 (surf1), nuclear gene encoding mitochondrial protein, mRNA	5.524	11.852	2.06075	4.918	4.9755	5.41725	11.044	6.893	4.08	9.068	2.96	7.603	4.904	5.666	4.391	6.401	1.236	4.558	8.11	2.045	2.7055	3.77267
gi|122114550|ref|NM_001080176.1| Danio rerio zgc:158856 (zgc:158856), mRNA	0	0	0	0	0	0	0	0	0	0.149	0	0	0	3.163	2.745	3.416	0	0	0	0	0	90.6407
gi|122114552|ref|NM_001080172.1| Danio rerio parahox cluster neighbor (prhoxnb), mRNA	0	0	0	0	0	0	0	0	0.239	0	0	0	0	0	0	0	0	0	0	9.4185	0	0.029
gi|122114556|ref|NM_001080174.1| Danio rerio sirtuin (silent mating type information regulation 2 homolog) 3 (S. cerevisiae) (sirt3), mRNA	0.834	1.268	0.647	0.816	0.8215	1.052	0.695	0	0.569	0.647	0.507	3.74	0	1.616	3.901	0.913	0.453	0.112	0	0	0.9215	2.516
gi|122114558|ref|NM_001080177.1| Danio rerio angiomotin like 2a (amotl2a), mRNA	11.01	13.048	5.3575	4.622	9.823	5.68225	10.171	3.614	2.207	8.643	4.402	1.631	2.664	8.37	3.767	8.237	3.256	6.467	9.332	1.571	6.5305	2.837
gi|122114560|ref|NM_001080175.1| Danio rerio protein arginine methyltransferase 2 (prmt2), mRNA	1.019	1.363	0.763	0.691	0.0955	0.681	3.057	1.682	0.668	1.77	1.486	3.657	1.231	1.975	1.06	0.893	5.206	2.53	0.083	0.0335	2.141	6.38867
gi|122114562|ref|NM_001080179.1| Danio rerio solute carrier family 47, member 2 (slc47a2), mRNA	2.551	1.186	1.7535	2.428	8.029	6.27075	1.85	3.006	2.867	0.372	2.096	0.234	4.831	2.151	0.936	2.463	0.652	2.266	6.115	1.093	7.447	0.831667
gi|122114564|ref|NM_001080178.1| Danio rerio cartilage acidic protein 1a (crtac1a), mRNA	0.377	1.835	3.47725	4.8735	2.588	0.88325	1.572	6.226	2.266	2.691	2.292	0.736	1.709	0	0	0.619	0.718	2.341	8.718	7.206	6.266	0.795333
gi|122114566|ref|NM_001080182.1| Danio rerio aquaporin 8a, tandem duplicate 2 (aqp8a.2), mRNA	0.58	0	0	0	0	0	0	0	0	0	0	0	0	0.112	0	0	10.88	0	0	4.5135	0	3.89467
gi|122114568|ref|NM_001080180.1| Danio rerio zinc finger protein 148 (znf148), transcript variant 1, mRNA	0	0	0.009	0	0	0.09825	0	0	0	0	0	0	0.103	0.04	0	0.112	0	0	0.271	0.118	0	0.218667
gi|122114570|ref|NM_001080181.1| Danio rerio guanine nucleotide binding protein (G protein), beta 5a (gnb5a), mRNA	0	0	0	0	0	0	0	0	0	0	0	0	0	0.368	0	0	0.387	2.435	0.0325	0	0	0.152667
gi|122114574|ref|NM_001080185.1| Danio rerio TNF receptor-associated factor 7 (traf7), mRNA	0.407	0.557	0.36825	0.2135	0.485	0.6595	0.373	0.12	0.278	0.758	0.742	2.065	0.307	0.513	0.318	0.223	0.055	0.055	0.0575	1.0235	0.4645	2.89567
gi|122114576|ref|NM_001080186.1| Danio rerio forkhead box F1 (foxf1), mRNA	1.26	0.479	0.12425	0.7385	0.05	0.0455	0.578	0.743	0.172	0.684	0.478	0.614	0	0.305	0.655	0.345	0.086	0.51	1.5505	0.078	0.443	0.0313333
gi|122114578|ref|NM_001080187.1| Danio rerio protein tyrosine phosphatase, mitochondrial 1 (ptpmt1), nuclear gene encoding mitochondrial protein, mRNA	2.487	2.457	1.87525	0.729	2.555	0.85125	1.554	2.199	1.188	1.735	0.378	2.425	1.877	1.325	0	0.681	0.845	0.503	0.4285	0	0.9565	3.523
gi|122114580|ref|NM_001080184.1| Danio rerio chromobox homolog 5 (HP1 alpha homolog, Drosophila) (cbx5), mRNA	1.621	3.722	0.59	0.705	1.703	0.15125	4.14	1.698	1.769	2.233	1.422	1.404	0.362	0.767	1.31	2.365	0.881	1.457	2.006	3.139	1.041	31.4893
gi|122114582|ref|NM_001080188.1| Danio rerio G protein-coupled receptor kinase interactor 2b (git2b), mRNA	1.904	1.867	0.29275	0.161	0.516	0.37475	1.739	1.665	0.738	1.828	1.455	0.766	0.556	1.023	1.787	2.151	1.068	2.087	1.436	0.939	1.0225	2.71933
gi|122114584|ref|NM_001080189.1| Danio rerio zgc:158328 (zgc:158328), mRNA	0.539	10.893	4.12725	5.5175	6.0025	4.3975	5.612	4.525	2.133	3.426	0.736	7.934	6.846	12.058	6.932	8.995	2.196	0.109	1.3665	0	0.207	0.00433333
gi|122114586|ref|NM_001080190.1| Danio rerio mannosyl-oligosaccharide glucosidase (mogs), mRNA	1.504	2.673	3.24475	1.8435	3.341	4.4335	5.397	4.227	1.705	2.44	0.773	2.978	1.281	1.748	1.203	1.52	1.886	4.494	4.708	1.914	0.808	2.59067
gi|122114589|ref|NM_001080193.1| Danio rerio lysine (K)-specific demethylase 6A, like (kdm6al), mRNA	2.944	2.831	2.40125	3.2865	5.2415	5.38375	4.541	4.277	2.505	6.37	5.948	2.136	3.652	2.494	1.708	3.522	9.227	6.613	5.64	6.2255	7.582	1.34533
gi|122114593|ref|NM_001080194.1| Danio rerio heparan sulfate 6-O-sulfotransferase 3 (hs6st3), mRNA	0	0	0	0	0	0	0	0	0	0	0	0	0	0	0	0	0	0	0	0	0	0.0713333
gi|122114595|ref|NM_001080195.1| Danio rerio zgc:158687 (zgc:158687), mRNA	6.327	12.78	10.5828	14.429	9.517	8.128	23.329	18.764	11.255	17.468	12.397	0	2.054	0.475	0	0.67	4.214	10.351	17.3615	3.9615	21.2965	0.374667
gi|122114601|ref|NM_001080196.1| Danio rerio non-SMC condensin I complex, subunit H (ncaph), mRNA	0.379	0	0.061	0.066	0	0.23375	0.126	0.894	0.483	0.078	0	0	0.254	0	0	0.277	0.481	0	0.508	0.4	0.0515	10.2183
gi|122114605|ref|NM_001080200.1| Danio rerio zgc:158450 (zgc:158450), mRNA	183.764	94.625	115.481	155.577	116.835	325.396	91.915	105.996	114.676	87.405	46.793	72.109	69.924	60.116	34.976	60.16	69.199	46.043	161.874	88.3075	75.045	13.021
gi|122114607|ref|NM_001080201.1| Danio rerio zgc:158706 (zgc:158706), mRNA	0	0.278	0.10375	0.358	0	0.062	0	0.18	0	0	0.185	0	1.535	0.059	0	0.167	0	0	0	0	0.1645	0.279333
gi|122114609|ref|NM_001080203.1| Danio rerio heparan sulfate 6-O-sulfotransferase 1b (hs6st1b), mRNA	2.494	4.549	3.13625	0.6495	1.971	0.93525	3.325	0.653	0.908	3.781	2.188	2.594	4.183	6.121	1.729	3.337	5.873	4.635	6.0455	2.329	3.9385	0.488333
gi|122114611|ref|NM_001080204.1| Danio rerio cytochrome P450, family 11, subfamily B, polypeptide 2 (cyp11b2), nuclear gene encoding mitochondrial protein, mRNA	1.192	0.104	0.03625	0	0	0.11275	0.284	0	0	0.422	0	0	0.171	0	1.062	0	0	0	0.0955	0	0.4575	0.151
gi|122114617|ref|NM_001080162.1| Danio rerio si:ch211-195k18.2 (si:ch211-195k18.2), mRNA	0.139	0.842	0.615	0.0725	1.264	0.1965	0.554	0.653	0.378	0.773	1.263	0	0.139	0.966	2.593	1.213	0.904	4.71	2.743	0	3.035	0.568333
gi|122114619|ref|NM_001080166.1| Danio rerio optic atrophy 3 (opa3), nuclear gene encoding mitochondrial protein, mRNA	0.27	0.82	0.08525	0	0.2125	0	1.528	1.589	1.178	0	0.819	0	1.085	0.522	0.28	2.361	0	0	0.2665	0	0.3625	5.013
gi|122114621|ref|NM_001080164.1| Danio rerio si:ch211-212o1.2 (si:ch211-212o1.2), mRNA	0	0.55	0.274	0.6695	0.43	1.67425	0.955	0.533	1.235	0.655	0.458	0	0	0.175	0.47	0.991	0.082	0.488	0.1435	0.169	0.384	4.915
gi|122114625|ref|NM_001080160.1| Danio rerio homeodomain interacting protein kinase 2 (hipk2), transcript variant 1, mRNA	1.29	0.728	1.09825	0.77	0.913	1.803	1.597	0.652	0.956	1.429	0.448	1.581	0.371	0.607	0.383	1.21	1.202	1.342	1.5295	0.6225	0.689	0.766
gi|122114634|ref|NM_001080202.1| Danio rerio si:ch211-103f16.2 (si:ch211-103f16.2), mRNA	0	0.11	0	0	0.029	0.037	0	0.214	0	0	0.055	0	0	0.035	0	0.199	0.049	0	0.1515	0	0.037	12.287
gi|122427241|ref|NM_001080171.1| Danio rerio discoidin, CUB and LCCL domain containing 2 (dcbld2), mRNA	0	0.911	0.09475	0	0.0955	0.23125	0.3	0.353	0	1.115	0.182	0	0	0	0.312	0.656	0	0.162	0	0.148	0.159	0.321333
gi|122937175|ref|NM_214794.2| Danio rerio si:dkeyp-113d7.1 (si:dkeyp-113d7.1), mRNA	26.628	16.324	16.057	13.0225	54.356	17.842	19.014	19.516	12.827	28.032	24.056	12.218	49.308	32.253	13.259	26.45	7.782	13.4	36.327	14.334	12.3135	1.55467
gi|122937176|ref|NM_001045018.2| Danio rerio general transcription factor IIIC, polypeptide 2, beta (gtf3c2), mRNA	0.252	0.077	0.04175	0.066	0.1585	0	0.042	0.149	0	0.234	0	0	0	0	0	0	0.137	0.068	0.034	0	0	1.148
gi|122937178|ref|NM_001044313.2| Danio rerio protein tyrosine phosphatase, non-receptor type 4, b (ptpn4b), mRNA	0.297	0.782	1.63775	0.232	0.329	0.24575	1.418	0.933	0.27	2.148	1.503	1.544	0.398	0.192	0	0.108	1.398	3.791	0.9065	0	1.4725	1.323
gi|122937180|ref|NM_001044923.2| Danio rerio si:dkey-222b8.1 (si:dkey-222b8.1), mRNA	2.53	2.603	1.15	0.4075	1.1975	0.391	2.4	0.918	1.381	2.052	1.773	0.152	1.567	2.941	4.046	2.556	0.529	1.89	2.4095	0.5195	3.8115	0.071
gi|123701052|ref|NM_001080610.1| Danio rerio olfactory receptor C family, d2 (olfcd2), mRNA	0	0	0	0	0	0	0	0	0	0	0	0	0	0	0	0	0	0	0	0	0	0
gi|123701054|ref|NM_001080705.1| Danio rerio ATG9 autophagy related 9 homolog B (S. cerevisiae) (atg9b), mRNA	0	0	0	0	0	0	0	0	0	0	0.162	0	0	0.103	0	0	0.145	0.288	0	0	0	0.364667
gi|123701100|ref|NM_001080704.1| Danio rerio zgc:158636 (zgc:158636), mRNA	8.225	26.899	7.335	1.6975	11.1925	6.08525	24.29	21.729	4.026	27.089	8.958	26.991	10.274	31.541	7.371	11.797	10.788	13.772	20.5815	3.739	10.067	6.67533
gi|123701144|ref|NM_001080702.1| Danio rerio zgc:158643 (zgc:158643), mRNA	0.492	0	0.068	0.8955	0	0.34	0.246	0	0.134	0	0.149	0	0	0.191	0	0.538	0.267	2.256	0.1385	0	0.2305	1.25567
gi|123701164|ref|NM_001080701.1| Danio rerio solute carrier family 32 (GABA vesicular transporter), member 1 (slc32a1), mRNA	5.207	0.821	1.1695	0	0.045	0.058	0.161	0	0.053	0	0	0	0.194	0.037	0	0.106	0.314	0.26	1.089	0	0	1.295
gi|123701188|ref|NM_001080699.1| Danio rerio zgc:158635 (zgc:158635), mRNA	0	0	0	0	0	0	0	0	0	0	0	0	0	0	0	0	0	0	0	0	0	0.538
gi|123701194|ref|NM_001080698.1| Danio rerio zgc:158628 (zgc:158628), mRNA	0	0.192	0	0	0	0	0	0	0	0	0	0	0	0	0	0	0	0	0.8705	0	1.2225	6.20733
gi|123701232|ref|NM_001080700.1| Danio rerio zgc:158614 (zgc:158614), mRNA	1.16	0.118	0.27475	0	2.083	1.60075	0.193	2.279	0.739	0.12	0.117	1.509	1.946	0.6	0.201	4.445	0.105	0	0.8555	8.763	0.0515	3.52267
gi|123701258|ref|NM_001080696.1| Danio rerio zgc:158785 (zgc:158785), mRNA	1.088	0.265	0.11	1.02	0.204	0.131	0.145	0.769	0.594	0.405	1.189	0	0.657	0.169	0	0.953	1.655	0.47	0.9795	1.1185	1.581	0.0193333
gi|123701272|ref|NM_001080697.1| Danio rerio pallidin homolog (mouse) (pldn), mRNA	17.463	118.133	26.1605	12.1185	55.425	44.5382	148.449	117.8	24.95	144.939	69.057	341.687	130.475	264.609	281.568	278.158	58.75	46.707	67.4295	81.444	37.769	4.23033
gi|123701274|ref|NM_001080695.1| Danio rerio zgc:158270 (zgc:158270), mRNA	29.705	36.211	35.039	27.9205	43.511	38.2465	44.569	35.011	31.175	34.363	26.924	27.132	32.213	36.319	21.76	22.574	13.214	17.521	42.4485	9.322	50.197	2.07
gi|123701276|ref|NM_001080694.1| Danio rerio zgc:158296 (zgc:158296), mRNA	0	0	0	0	0	0	0	0	0	0	0	0	0	0.223	0.598	0	0.156	0.31	0	0	0	0.120667
gi|123701322|ref|NM_001080693.1| Danio rerio zgc:158760 (zgc:158760), mRNA	4.985	1.754	0.83325	0.752	2.3535	1.1145	2.273	1.546	2.005	0.976	1.115	0.819	0.528	1.118	0.818	1.149	3.279	0.708	3.3755	0.19	0.283	3.19633
gi|123701370|ref|NM_001080691.1| Danio rerio zgc:158254 (zgc:158254), mRNA	4.371	1.971	3.13125	0.9175	2.6695	2.2475	3.242	2.493	0.924	3.847	2.74	0.44	1.702	2.021	1.319	1.08	0.919	1.445	2.6925	4.637	2.664	0.665
gi|123701397|ref|NM_001080689.1| Danio rerio dual-specificity tyrosine-(Y)-phosphorylation regulated kinase 1A, a (dyrk1aa), mRNA	2.523	1.278	1.114	0.6605	2.925	2.40225	1.588	2.313	1.837	1.652	1.107	1.968	4.372	3.585	0.437	2.608	1.98	1.513	3.264	0.7345	0.793	1.536
gi|123701428|ref|NM_001080692.1| Danio rerio UDP glucuronosyltransferase 5 family, polypeptide B4 (ugt5b4), mRNA	0.143	0.087	0	0	0	0	0.669	0.169	0	0.178	0.087	0.112	0	0.5	0.298	0.157	0.311	0.773	0.117	0	0	0.573333
gi|123701495|ref|NM_001080690.1| Danio rerio zgc:158288 (zgc:158288), mRNA	45.153	35.368	23.1608	24.388	47.081	56.3477	35.879	21.833	64.63	37.337	68.387	26.415	42.52	55.178	47.54	61.775	35.544	29.202	51.6345	759.661	54.103	1.69267
gi|123701542|ref|NM_001080687.1| Danio rerio crystallin, mu (crym), mRNA	0	3.155	0.402	1.5355	1.306	1.052	3.93	3.614	1.417	2.487	5.588	1.472	5.697	4.387	7.357	11.361	5.512	5.218	2.7745	0.42	1.109	0.238
gi|123702576|ref|NM_001080688.1| Danio rerio pyruvate dehydrogenase kinase, isozyme 3b (pdk3b), mRNA	0	0	0	0	0	0	0	0.698	0	0	0.36	0	0	0.115	0	0	0	0	0	0	0	0.176667
gi|123702611|ref|NM_001080686.1| Danio rerio transmembrane protein 205 (tmem205), mRNA	6.57	20.847	5.42125	1.6705	17.6555	1.28	21.038	30.595	2.275	21.068	18.297	16.623	35.149	37.687	26.652	25.255	5.572	9.25	8.6545	4.3035	10.718	5.5
gi|123702627|ref|NM_001080685.1| Danio rerio sperm adhesion molecule 1 (spam1), mRNA	0	0	0	0	0	0	0	0	0	0	0	0	0.225	0	0	0	0	0	0	0	0	0.0393333
gi|123702683|ref|NM_001080684.1| Danio rerio von Hippel-Lindau tumor suppressor (vhl), mRNA	5.532	3.54	1.72475	4.3275	7.0265	5.074	6.113	15.1	5.087	8.668	4.952	0	2.051	4.513	6.357	6.055	6.962	3.142	7.3465	3.0895	2.8925	3.05033
gi|123702723|ref|NM_001080683.1| Danio rerio zgc:158647 (zgc:158647), mRNA	0.149	0.181	0.25725	0.2715	1.319	0.309	0.448	0.352	0.244	0.555	0.725	0	0.45	0.058	0	0.49	0.081	0.483	0.2085	0.049	0.261	1.404
gi|123702755|ref|NM_001080681.1| Danio rerio ELMO/CED-12 domain containing 1 (elmod1), mRNA	0	0	0	0	0	0	0	0	0	0	0	0	0	0	0	0	0	0	0	0	0	0.07
gi|123702805|ref|NM_001080682.1| Danio rerio leucine rich repeat containing 15 (lrrc15), mRNA	0	0.283	0	0	0	0	0.155	0	0	0.192	0	0	0	0.18	0.322	0	0	0	0	0	0	0.637333
gi|123702888|ref|NM_001080678.1| Danio rerio transient receptor potential cation channel, subfamily M, member 1 (trpm1), mRNA	0.248	4.522	1.4905	0.3895	2.1125	1.1795	10.329	3.799	6.092	26.144	16.116	0	0.25	0.096	0	0.814	29.778	45.889	11.68	7.199	32.392	0
gi|123702932|ref|NM_001080673.1| Danio rerio dachshund d (dachd), mRNA	0.837	0.17	0.08475	0.219	0.11	0.20125	1.023	0.164	0.457	0.865	0.17	0	0	0.378	0.29	1.222	0.227	1.205	1.5465	1.582	0.449	0.214333
gi|123702961|ref|NM_001080675.1| Danio rerio zgc:158621 (zgc:158621), mRNA	0	0.095	0	0	0	0	0.052	0.184	0	0	0	0	0	0.06	0	0	0	0.168	0	0	0	0.0376667
gi|123702982|ref|NM_001080674.1| Danio rerio zgc:158653 (zgc:158653), mRNA	0.386	0.117	0.07	0.6545	0.2425	0.7475	0.643	0.227	0.421	0.12	0.234	0	0.388	0.897	0	0.211	0.105	1.457	0.1085	0	0.4605	1.633
gi|123703001|ref|NM_001080672.1| Danio rerio zgc:158624 (zgc:158624), mRNA	0	0	0.092	0	0	0	0	0	0.145	0	0.08	0.103	1.598	0.564	0.138	0.145	0	0.214	0	0	0	3.186
gi|123703015|ref|NM_001080670.1| Danio rerio heparan sulfate 2-O-sulfotransferase 1a (hs2st1a), mRNA	0.335	1.018	0.546	0.0875	0.7135	0.07675	1.34	1.58	0.183	1.143	2.137	0.131	0.337	0.649	0.174	1.1	0.091	0.723	0.439	0	0.403	1.49733
gi|123703034|ref|NM_001080669.1| Danio rerio serine/arginine-rich protein specific kinase 1b (srpk1b), mRNA	0.852	0.345	0.26375	0	0.7385	0.67575	0.852	0.167	0.233	0.969	0	0	0	0.385	0.295	0.933	0	0	1.263	0.2995	0.171	4.472
gi|123703049|ref|NM_001080668.1| Danio rerio zgc:158258 (zgc:158258), mRNA	0.678	0.876	0.52	0.4655	0.1465	0.095	0.593	0.899	0.324	0.684	1.545	0.066	0.597	0.329	0.441	0.742	3.547	2.15	0.655	0.1175	2.242	1.26933
gi|123703072|ref|NM_001080671.1| Danio rerio zgc:158626 (zgc:158626), mRNA	0	0.233	0	0	0	0	0	0	0	0.476	0	0	0	0	0	0	0.209	0.621	0	0	0.078	1.83167
gi|123703087|ref|NM_001080667.1| Danio rerio solute carrier family 26 (sulfate transporter), member 1 (slc26a1), mRNA	0.25	0.076	0.074	0.0655	0	0	0.125	0	0.136	0.077	0	0	0	0.194	0.26	0	1.154	0.27	0.4705	0	0	0.08
gi|123703101|ref|NM_001080665.1| Danio rerio zgc:158651 (zgc:158651), mRNA	1.082	0.329	0.19575	0.17	0.599	0.27325	0.072	0	0.473	0.336	1.052	0	0.545	0.084	0	0.711	0	0.818	0.4645	0	0.1455	0.461
gi|123703107|ref|NM_001080664.1| Danio rerio sideroflexin 3 (sfxn3), mRNA	0	0	0.13025	0	0.234	0	0	0	0.115	0.525	0.128	0	0	0	0	0	0.575	1.141	0.439	0	0.086	2.32467
gi|123703137|ref|NM_001080666.1| Danio rerio solute carrier organic anion transporter family, member 1F4 (slco1f4), mRNA	0	0	0	0	0	0	0.245	0.174	0.08	0.091	0	0	0	0.114	0	0	0	0.318	0	0	0	0.013
gi|123703150|ref|NM_001080663.1| Danio rerio RIB43A domain with coiled-coils 1 (ribc1), mRNA	2.193	0.8	0	0	0	0	1.534	0.775	0	0.816	0	0	0	2.464	3.875	0	0	1.065	0	0	0	0
gi|123703164|ref|NM_001080661.1| Danio rerio si:dkey-19f23.3 (si:dkey-19f23.3), mRNA	147.3	566.609	655.835	1646.97	321.03	709.94	569.579	343.266	758.26	403.482	284.384	33.2	96.558	54.675	39.957	61.834	211.239	197.215	186.779	92.8865	413.033	0.034
gi|123703271|ref|NM_001080660.1| Danio rerio neurogranin (protein kinase C substrate, RC3) b (nrgnb), mRNA	0.596	0.181	0	0	0	0	0.298	0.702	0	0.185	0	0	0	0.577	0	0	1.133	1.285	0.0405	0.049	0	2.56567
gi|123703327|ref|NM_001080659.1| Danio rerio zgc:158689 (zgc:158689), mRNA	4.154	7.786	4.90675	5.196	3.004	8.01175	6.459	3.264	3.213	6.548	2.943	1.215	0.174	0.738	0	0.379	1.505	3.922	5.2635	1.7965	3.295	0.264333
gi|123703388|ref|NM_001080658.1| Danio rerio calcium/calmodulin-dependent protein kinase 1D (camk1d), transcript variant 1, mRNA	0.391	0	0	0	0.0915	0	0.195	0	0	0.728	0.831	0.153	0.59	1.136	0.203	2.14	0.319	2.321	0.6035	0	0	0
gi|123703390|ref|NM_001080657.1| Danio rerio FEV (ETS oncogene family) (fev), mRNA	0	0.212	0	0	0	0	0	0	0	0	0	0	0	0	0	0	0	0	0.1425	0	0	0.468667
gi|123703550|ref|NM_001080655.1| Danio rerio patatin-like phospholipase domain containing 7a (pnpla7a), mRNA	1.522	0	0.15025	0.2655	0.7185	0.839	0.085	0.598	0.277	0.315	0.462	0	0.511	0.688	0	0.833	0.965	1.643	1.5605	0.5185	1.265	2.17133
gi|123703564|ref|NM_001080652.1| Danio rerio zgc:158791 (zgc:158791), mRNA	3.331	2.25	1.196	2.3165	1.514	2.75875	1.912	0.654	4.345	1.722	0.562	0.866	0.559	0.287	0	0.81	1.508	4.393	0.758	0	1.7865	0.0306667
gi|123703598|ref|NM_001080651.1| Danio rerio zgc:158603 (zgc:158603), mRNA	0.455	0.553	0.2625	0.159	0.6005	0.1735	0.404	0.536	0.248	1.035	0.276	0.118	0.153	0.823	0	0.166	0.494	0.409	0.4415	0.27	0.445	1.33067
gi|123703647|ref|NM_001080562.1| Danio rerio zgc:158605 (zgc:158605), mRNA	14.014	39.798	37.3717	29.4165	34.3075	47.938	34.993	29.641	34.902	30.718	16.441	12.878	13.715	25.886	17.163	19.121	19.403	16.261	31.1105	7.762	18.6915	4.28667
gi|123703664|ref|NM_001080563.1| Danio rerio GTPase activating protein (SH3 domain) binding protein 2 (g3bp2), mRNA	1.948	1.453	0.4895	0.2535	0.6015	0.46375	0.856	1.461	0.338	1.318	2.366	0.345	0.98	0.343	1.197	1.938	1.01	3.965	1.78	1.0885	0.842	2.66767
gi|123703689|ref|NM_001080561.1| Danio rerio zgc:158645 (zgc:158645), mRNA	0	0	0.052	0	0.0615	0.12125	0.129	0.684	0.106	0.24	0	0	0	0.225	0	0.847	0	0	0	0	0.154	2.38033
gi|123703718|ref|NM_001080570.1| Danio rerio beta-1,4-N-acetyl-galactosaminyl transferase 1a (b4galnt1a), mRNA	0.323	1.079	0	0.0845	0	0	0.699	0.951	0.529	0.2	1.176	0.881	0.65	0.438	0.336	0.353	0.789	1.132	0.022	0.0905	0	0.0496667
gi|123703756|ref|NM_001080558.1| Danio rerio zgc:158666 (zgc:158666), mRNA	0	0	0	0	0	0	0	0	0	0	0	0	0	0	0	0	0	0	0	0	0	0.00333333
gi|123703774|ref|NM_001080568.1| Danio rerio heparan sulfate (glucosamine) 3-O-sulfotransferase 3B1b (hs3st3b1b), mRNA	0.854	0	0.0675	0	0	0.041	0	0	0.155	0.177	0.173	0	0	0	1.48	0	0	0	0.0775	0	0.3825	0
gi|123703819|ref|NM_001080571.1| Danio rerio RAN binding protein 9 (ranbp9), mRNA	75.874	54.815	19.1097	14.567	62.3805	54.4922	68.756	59.319	24.654	86.283	45.9	56.928	66.705	97.859	43.309	109.005	38.832	29.779	58.5025	28.199	52.5455	4.162
gi|123703885|ref|NM_001080567.1| Danio rerio dystrophin related protein 2 (drp2), mRNA	0	0	0.00725	0	0	0	0	0	0	0	0	0	0.802	0.132	0	0.125	0	0	0.0155	0	0	0
gi|123703923|ref|NM_001080575.1| Danio rerio collagen, type XXVII, alpha 1b (col27a1b), mRNA	0	0.041	0.0515	0.0715	0.0215	0.028	0.25	0.08	0.037	0.085	0.124	0	0	0	0	0.075	0	0	0.028	0	0.2555	0.0663333
gi|123703925|ref|NM_001080572.1| Danio rerio solute carrier family 29 (nucleoside transporters), member 4 (slc29a4), mRNA	1.337	0.271	0	0.078	0	0	0.198	0	0	0.092	0.09	0	0	0	0	0	0.161	0	0	0	0	0.482667
gi|123703929|ref|NM_001080573.1| Danio rerio dystrobrevin, beta (dtnb), mRNA	0	0.094	0.147	0.3605	0.878	0.60175	0.103	0.544	0.084	0.095	0.561	0	0	0	0	0	0	0	0	0	0.0625	0.0103333
gi|123703947|ref|NM_001045134.2| Danio rerio SET domain containing 1B, a (setd1ba), mRNA	0.333	0.101	0.19375	0.0435	0.1645	0.15725	0.125	0.147	0.023	0.052	0.278	0.162	0.126	0.129	0.346	0.228	0.113	0.382	0.446	0.166	0.1555	0.84
gi|123704023|ref|NM_001044715.2| Danio rerio nardilysin (N-arginine dibasic convertase) (nrd1), mRNA	1.154	1.17	0.91625	0.451	0.576	0.41125	2.34	0.794	0.578	0.835	0.292	0	0.097	0.149	0.5	0.316	0.261	2.18	1.378	0	0.1685	1.39733
gi|123704038|ref|NM_001080576.1| Danio rerio epithelial splicing regulatory protein 1 (esrp1), mRNA	0.463	0.113	0	0	0	0	0.093	0	0	0	0	0	0	0.036	0	0	0.906	0	0.579	0.0675	0	1.153
gi|123704252|ref|NM_001080578.1| Danio rerio zgc:158649 (zgc:158649), mRNA	2.989	2.271	1.08575	0.976	1.6965	2.47975	2.042	2.994	1.469	2.224	2.814	3.963	1.203	2.027	2.33	2.781	1.056	0.726	3.898	0.463	1.062	1.06133
gi|123704350|ref|NM_001080577.1| Danio rerio cadherin, EGF LAG seven-pass G-type receptor 2 (celsr2), mRNA	0.538	0.374	0.1415	0.11	0.2675	0.244	0.346	0.181	0.189	0.119	0.303	0.09	0.232	0	0.28	0.084	0.167	0.041	1.353	0.252	0.2685	0.0443333
gi|123704383|ref|NM_001039627.2| Danio rerio insulin-like growth factor 2 receptor (igf2r), mRNA	0.735	1.006	1.09575	0.7555	0.4645	1.247	0.965	0.921	0.326	0.941	0.726	1.649	1.526	0.837	0.956	0.956	1.499	1.19	1.761	0.753	0.629	2.761
gi|123704398|ref|NM_001080579.1| Danio rerio zgc:153917 (zgc:153917), mRNA	0.103	0.125	0.09925	0.108	0.2115	0.13375	0.447	0.365	0.113	0.32	0.69	3.139	1.661	1.32	5.257	1.694	0.112	0.334	0.1845	0.177	0.1515	0.502667
gi|123704446|ref|NM_001080580.1| Danio rerio zgc:158225 (zgc:158225), mRNA	0.166	0.606	0.0525	0.0435	0.0265	0	0.387	1.076	0	0.103	0.403	0	0.418	0.836	1.381	1	0.722	0.627	0.4625	0	0.1235	0.748333
gi|123704497|ref|NM_001080582.1| Danio rerio matrix-remodelling associated 8a (mxra8a), mRNA	0.281	0	0	0	0	0	0.187	0	0	0	0	0	0	0	0	0.103	0.051	0.051	0	0	0	2.937
gi|123704522|ref|NM_001080583.1| Danio rerio retinol dehydrogenase 10a (rdh10a), mRNA	0.708	0.602	0.295	0.886	5.8765	0.92775	0.519	9.674	0.386	3.862	10.315	5.188	25.632	5.922	24.127	11.772	0.384	0.687	3.26	3.325	1.611	0.95
gi|123704545|ref|NM_001080584.1| Danio rerio mitochondrial antiviral signaling protein (mavs), nuclear gene encoding mitochondrial protein, mRNA	0.538	0.374	0.0145	0.04	0.4845	0.16825	0.384	0.725	0.168	0.381	1.074	0.18	0.232	0.179	0.16	0.168	0.251	0.829	0.389	0.281	0.216	0.981
gi|123704641|ref|NM_001080585.1| Danio rerio synaptogyrin 2a (syngr2a), mRNA	0	15.568	0.2985	0.052	0.499	0.089	12.717	10.837	2.645	9.627	21.979	2.699	1.293	13.523	10.175	7.25	18.105	17.016	0.0135	0.0555	3.7345	5.96033
gi|123704645|ref|NM_001044979.2| Danio rerio eph receptor A7 (epha7), mRNA	4.093	11.421	10.7375	6.462	4.453	12.9145	14.899	6.556	6.074	10.61	3.251	0.737	0.211	1.261	0.982	1.379	2.224	4.983	11.6125	8.7815	9.75	0.111667
gi|123704668|ref|NM_001080586.1| Danio rerio family with sequence similarity 129, member Ba (fam129ba), mRNA	1.005	0.141	0.0325	0	0.0245	0.027	0.026	0	0.084	0	0.047	0.06	1.555	0.809	2.33	0.677	0.084	0.125	0.108	0.423	0	4.28267
gi|123704747|ref|NM_001080587.1| Danio rerio dystrotelin (dytn), mRNA	8.594	0.591	0	0.295	0	0	0.216	0.191	0.089	0.101	0.197	0	0	0.063	0	0.355	0.176	0	0.022	0	1.324	0.0106667
gi|123704785|ref|NM_001080588.1| Danio rerio INO80 complex subunit Db (ino80db), mRNA	2.47	0.282	0.44025	0.362	0.62	0.276	0.72	0.728	0.126	0.718	1.125	0	1.709	0.449	0.562	0.507	0.168	1.791	1.952	0.435	1.0685	3.52833
gi|123704809|ref|NM_001080590.1| Danio rerio WAS protein family, member 3 (wasf3), mRNA	11.568	3.135	2.58425	2.071	3.6635	5.42825	5.945	3.121	3.652	10.804	6.349	3.587	15.566	14.364	16.226	12.508	3.786	5.639	9.597	5.043	9.322	3.52633
gi|123704900|ref|NM_001080589.1| Danio rerio heparan sulfate (glucosamine) 3-O-sulfotransferase 4 (hs3st4), mRNA	0	0	0	0	0	0.0385	0.179	0	0	0.166	0	0	0	0	0	0	0.146	1.301	0	0	0	0.121333
gi|123704970|ref|NM_001080592.1| Danio rerio zgc:158781 (zgc:158781), mRNA	0	0	0	0	0	0	0	0	0	0	0	0	0	0	0	0	0	0	0	0	0	0.28
gi|123705029|ref|NM_001080591.1| Danio rerio zgc:136380 (zgc:136380), transcript variant 1, mRNA	4.705	4.241	4.244	2.33	4.3405	1.66625	5.352	8.222	3.189	1.107	1.774	1.772	6.856	6.537	9.107	4.262	2.909	3.326	2.1285	1.411	1.887	0.607333
gi|123705073|ref|NM_001080593.1| Danio rerio heparan sulfate (glucosamine) 3-O-sulfotransferase 1 (hs3st1), mRNA	0.769	0	0	0	0	0	0	0	0	0	0	0	0	0	0	0	0	0	0.6345	0	0.9315	1.16833
gi|123705106|ref|NM_001080595.1| Danio rerio tubulin tyrosine ligase-like family, member 7 (ttll7), mRNA	1.01	0	0	0	0	0	0.056	0	0.092	0	0.307	0	0	0	0	0	0	0	0	0	0	1.59033
gi|123705183|ref|NM_001080597.1| Danio rerio D-2-hydroxyglutarate dehydrogenase (d2hgdh), nuclear gene encoding mitochondrial protein, mRNA	0	0	0	0	0.409	0.21775	0.062	0.436	0.101	0.344	0.112	1.153	0	0	0	0.809	0	0	0.025	2.21	0.5195	1.11467
gi|123705187|ref|NM_001080598.1| Danio rerio actin binding LIM protein family, member 3 (ablim3), mRNA	0	0.453	0.01075	0.065	1.984	0.3755	0.124	1.902	0.203	1.155	2.111	0	0	0	0	0	0.067	0.268	0.258	0.875	0.1165	0.589667
gi|123705225|ref|NM_001080600.1| Danio rerio SHQ1 homolog (S. cerevisiae) (shq1), mRNA	2.157	0.481	0.725	0.769	2.2645	1.2785	0.719	1.525	1.805	0.802	1.31	1.57	0.723	0.585	1.42	0.629	0.82	2.598	2.192	1.8735	1.3635	2.96733
gi|123705278|ref|NM_001080601.1| Danio rerio frizzled homolog 3b (fzd3b), mRNA	0	0.926	1.1555	0	0.1875	0.762	1.749	1.796	0.37	2.205	1.851	0.396	0.341	0.066	0.88	0.185	0.92	4.749	2.102	1.8965	1.5885	0.451667
gi|123705280|ref|NM_001080602.1| Danio rerio early B-cell factor 3 (ebf3), mRNA	14.867	5.308	0.997	0.524	1.1735	0.048	1.376	0.834	0.258	0.585	0.358	1.196	0	0.366	0	0.129	0.385	0	9.123	0.35	0.394	0.570667
gi|123705366|ref|NM_001080605.1| Danio rerio leucine-zipper-like transcription regulator 1 (lztr1), mRNA	0.674	1.054	2.053	1.357	3.3505	3.47375	1.701	1.816	2.577	1.852	1.58	1.503	1.551	1.679	0.2	2.003	0.471	0.676	6.3665	1.3805	3.2875	15.575
gi|123705408|ref|NM_001080603.1| Danio rerio zgc:153460 (zgc:153460), mRNA	3.489	20.539	44.0915	14.1295	25.487	9.86	32.795	31.812	7.017	39.969	33.402	5.872	18.106	13.909	14.888	11.254	21.351	30.313	13.454	10.156	33.332	1.28433
gi|123705548|ref|NM_001080604.1| Danio rerio zinc finger and BTB domain containing 20 (zbtb20), mRNA	0.47	1.542	1.4165	0.3185	1.3965	0.54275	0.877	3.212	0.359	2.273	3.938	0.366	0.189	0.182	0	0.514	1.225	1.876	0.598	0.6655	1.3855	0.295
gi|123705603|ref|NM_001080608.1| Danio rerio heparan sulfate (glucosamine) 3-O-sulfotransferase 2 (hs3st2), mRNA	0	0	0	0	0.1385	0.0925	0.098	1.044	0.161	0.183	1.614	0	0	0	0	0	0	0	0	0	0.198	0
gi|123705626|ref|NM_001080609.1| Danio rerio sal-like 4 (Drosophila) (sall4), mRNA	0	0	0.1385	0.1845	0	0.0145	0	0	0	0	0	0.475	0	0.039	0	0	0	0	0.128	0	0.027	0.833667
gi|123705706|ref|NM_001080607.1| Danio rerio GLIS family zinc finger 3 (glis3), mRNA	1.272	0.077	0	0	0	0.03675	0.085	0	0	0	0.155	0.198	0	0	0.132	0	0.069	0.069	0	0.021	0	0.00266667
gi|123705930|ref|NM_001080612.1| Danio rerio zgc:158795 (zgc:158795), mRNA	0.269	0.327	0.48375	1.192	1.0585	1.1615	2.775	2.216	0.147	2.998	2.61	0.419	1.351	3.122	0.838	1.764	1.022	0.725	1.1155	0.0445	0.6505	0.252333
gi|123705970|ref|NM_001080614.1| Danio rerio cysteine and glycine-rich protein 1b (csrp1b), mRNA	0	0.222	0.85425	0	0.1715	0	0.487	0	0	0.907	0.222	0	0	0.142	0	0.4	0.199	0.197	15.458	1.361	1.4735	0.705667
gi|123706046|ref|NM_001080615.1| Danio rerio zgc:153176 (zgc:153176), mRNA	17.289	38.962	14.7513	11.744	28.431	65.6685	53.341	18.972	16.6	36.049	13.941	50.687	20.096	43.197	34.086	24.47	21.866	44.388	19.566	27.15	16.5285	2.486
gi|123706193|ref|NM_001080619.1| Danio rerio solute carrier family 39 (zinc transporter), member 3 (slc39a3), mRNA	0.087	0.318	0.6905	0.296	0.303	0.16775	0.611	0.72	0.476	0.758	0.159	0.136	0.351	0.338	0.272	0.382	0.379	1.13	0.6485	0.285	0.9685	0.556333
gi|123706332|ref|NM_001080617.1| Danio rerio growth regulation by estrogen in breast cancer 1 (greb1), mRNA	0	0	0.046	0	0.171	0.11425	0	0	0	0	0	0	0	0	0	0.399	0	0	0	1.837	0	1.121
gi|123706334|ref|NM_001080618.1| Danio rerio zgc:158580 (zgc:158580), mRNA	0	0.771	0.032	0	0	0	0.084	0	0.138	0.314	0.462	0	0	0.196	0	0	5.924	0.137	0.2115	12.256	0.067	24.2697
gi|123706446|ref|NM_001080620.1| Danio rerio zgc:158297 (zgc:158297), mRNA	20.849	3.257	1.3035	1.1335	3.7325	4.05025	3.956	4.949	2.213	1.167	0.616	3.84	1.602	1.234	0.602	0.317	1.652	1.953	3.504	0.6585	2.3645	2.69133
gi|123706498|ref|NM_001080621.1| Danio rerio zgc:158464 (zgc:158464), mRNA	0.545	0.221	0.4105	0.616	0.116	0.02625	0.363	0	0	0	0.11	0	0	0.141	0.378	0	0.099	0.588	0.2535	0	0.536	0.112333
gi|123706704|ref|NM_001080622.1| Danio rerio CD276 molecule (cd276), mRNA	0.938	2.472	2.0275	1.8365	1.5055	2.0955	2.71	2.949	1.452	1.94	1.425	0.366	0.629	2.242	0	0.171	1.7	3.628	2.999	1.3345	1.1555	0.811
gi|123706730|ref|NM_001080624.1| Danio rerio zgc:158642 (zgc:158642), mRNA	0.636	0.58	0.23975	0	0.826	0.59825	0.688	0.375	0.087	0.788	0.097	4.833	0.799	0.616	0.33	1.043	1.381	1.457	1.0765	1.0995	0.5755	2.963
gi|123706800|ref|NM_001080623.1| Danio rerio zgc:158659 (zgc:158659), mRNA	0.415	0	0	0	0	0	0.069	0	0	0.129	0.378	0.162	0	0	0	0	0	0	0	0	0	0.139667
gi|123706830|ref|NM_001080626.1| Danio rerio lysyl oxidase-like 2b (loxl2b), mRNA	0.115	1.049	0.86575	0	0.9815	0.71575	1.571	0.949	0.439	1.783	2.584	0.987	0	0.312	0.717	0	0.5	1.489	1.0355	0.019	0.7355	4.015
gi|123706849|ref|NM_001004532.2| Danio rerio synaptoporin (synpr), mRNA	0	0.146	0	0	0	0	0	0	0	0	0	0	0	0	0	0	0	0	0	0	0	0.299667
gi|123706930|ref|NM_001004529.2| Danio rerio enoyl Coenzyme A hydratase, short chain, 1, mitochondrial (echs1), nuclear gene encoding mitochondrial protein, mRNA	5.968	7.547	3.01975	3.0595	4.928	4.33825	6.284	5.909	5.865	6.958	6.38	5.028	1.441	3.145	4.963	4.703	2.075	9.917	3.998	2.6435	3.266	3.403
gi|123707032|ref|NM_001080625.1| Danio rerio zgc:158419 (zgc:158419), mRNA	1.207	0.22	0.062	0.346	0.743	0.262	0.362	0.996	0.593	0.973	1.246	1.788	0	0.327	0.251	0.396	0	0.065	0	0	0.757	4.56433
gi|123707104|ref|NM_001080627.1| Danio rerio phosphodiesterase 8A (pde8a), mRNA	2.484	5.751	2.73175	8.082	6.023	14.0475	5.127	2.928	3.547	9.304	5.166	2.012	3.173	1.925	0.695	2.615	2.648	6.29	1.9305	19.7465	2.613	1.13433
gi|123707182|ref|NM_001080653.1| Danio rerio branched chain ketoacid dehydrogenase E1, beta polypeptide (bckdhb), nuclear gene encoding mitochondrial protein, mRNA	37.003	25.593	13.9183	19.3205	36.1295	44.774	33.447	32.121	30.121	41.911	22.609	21.949	37.678	36.745	12.668	23.524	18.059	4.662	37.0455	18.1	21.5805	3.479
gi|123707223|ref|NM_001080648.1| Danio rerio zgc:158228 (zgc:158228), mRNA	0	0.9	0.06825	0	0.0785	0.1485	1.151	0.291	0.808	0.765	0	0.192	0	1.052	1.282	1.08	0.134	1.997	0.0335	0.1785	0.1005	0.924
gi|123707247|ref|NM_001080649.1| Danio rerio zgc:158222 (zgc:158222), mRNA	0	0.152	0.04175	0.0655	0	0.087	0.209	0	0	0.543	0.38	0	0.126	0.582	0.651	0.137	0.952	0	0.034	0	0.0995	0.321333
gi|123707557|ref|NM_001080647.1| Danio rerio zgc:158644 (zgc:158644), mRNA	0.173	0.105	0.05475	0.091	0.4625	0.175	0.173	0.204	0	0.323	0.527	0	0.349	0.202	0.18	0.38	0.377	0.374	1.9215	0	0.717	4.422
gi|123707595|ref|NM_001080646.1| Danio rerio CD226 molecule (cd226), mRNA	0	0.128	0.51675	0	0.2325	0.11575	0.07	0.496	0.115	0	0	0	0	0.163	0.219	0	0.114	0.454	0	0	0.446	0.337667
gi|123707694|ref|NM_001080645.1| Danio rerio zgc:158657 (zgc:158657), mRNA	0	0.431	0.047	0	0.045	0	0.331	0.334	0	0.264	0.172	0	0.143	0	0	0.155	0.154	0.919	0.0195	0	0.421	5.13733
gi|123707740|ref|NM_001080644.1| Danio rerio tetratricopeptide repeat domain 15 (ttc15), mRNA	0	0.963	0.7295	0.358	0.4815	0.58125	0.809	0.747	0.231	1.048	1.09	0.165	0.319	0.614	0	0.693	0.803	2.62	1.625	0.8835	0.933	1.72033
gi|123707831|ref|NM_001080641.1| Danio rerio galactosamine (N-acetyl)-6-sulfate sulfatase (galns), mRNA	1.619	12.356	2.929	9.6655	8.842	12.5935	11.388	10.812	7.758	10.262	4.916	19.501	7.42	8.363	1.309	7.875	4.789	2.232	8.329	5.429	5.529	0.937
gi|123707860|ref|NM_001080642.1| Danio rerio zgc:158357 (zgc:158357), mRNA	6.11	2.286	0.93275	2.3295	8.8145	5.05025	0.901	7.063	3.913	4.591	2.427	5.407	2.956	5.281	0.611	3.087	12.259	1.902	2.563	11.67	2.445	0.669
gi|123707911|ref|NM_001080640.1| Danio rerio transmembrane emp24 protein transport domain containing 1b (tmed1b), mRNA	7.244	10.148	11.345	7.964	12.24	11.3247	10.286	9.281	12.897	2.344	6.313	8.599	2.218	4.882	0.655	5.171	8.386	4.928	12.6055	3.446	5.5285	0.173667
gi|123707983|ref|NM_001080638.1| Danio rerio solute carrier family 25 (mitochondrial carrier; ornithine transporter) member 15a (slc25a15a), nuclear gene encoding mitochondrial protein, mRNA	1.057	0	0	0	0	0	0	0	0	0.131	0.257	0	0	0	0	0	0	0	0	0	0	0.121333
gi|123708077|ref|NM_001080636.1| Danio rerio zgc:158741 (zgc:158741), mRNA	0.34	2.686	1.64525	0.356	0.319	0.6685	2.039	2.404	0.928	1.686	1.239	0.265	0.342	1.054	1.767	2.232	1.108	2.017	0.607	0	0.4565	0.63
gi|123708079|ref|NM_001080635.1| Danio rerio low density lipoprotein receptor adaptor protein 1b (ldlrap1b), mRNA	0.624	0	0.138	0	0.23	0	0	0	0	0	0	0.649	0	0	0	0	0	0	0.2015	0	0	0.953333
gi|123708081|ref|NM_001080634.1| Danio rerio zgc:158847 (zgc:158847), mRNA	0.222	1.078	0.67425	0.4645	1.223	0.69175	2.364	1.568	1.089	0.55	0.943	0.173	0	0.601	0.461	0	0.241	0	1.08	0	0.059	2.50567
gi|123708137|ref|NM_001080631.1| Danio rerio retinal degeneration 3 (rd3), mRNA	0.217	0	0.07225	0.2275	0.51	0.06825	0	0.512	0	0.27	0	1.356	0	0.168	0	0.238	0.118	0.586	0.0295	1.3035	0.88	0.982
gi|123708140|ref|NM_001080633.1| Danio rerio si:busm1-160c18.3 (si:busm1-160c18.3), mRNA	0	0	0.192	0.3435	0	0	0.219	0	0	0	0.399	0	0	0	0	0	0	0	0	0	2.8125	0.123
gi|123708206|ref|NM_001080630.1| Danio rerio zgc:158863 (zgc:158863), mRNA	10.868	8.589	5.719	3.8515	5.462	5.50275	11.226	9.881	8.645	11.265	6.318	8.961	16.246	10.166	10.49	10.026	3.121	11.057	19.8075	7.909	12.887	7.81067
gi|123708231|ref|NM_001080565.1| Danio rerio zgc:158404 (zgc:158404), mRNA	1.297	77.088	1.1155	2.45	0.691	9.1555	11.725	2.102	1.593	3.319	1.182	0.253	0.163	0.691	0.337	0	26.257	3.587	0.74	0.0535	0.459	0.232
gi|123858771|ref|NM_001004527.3| Danio rerio protein phosphatase 1, catalytic subunit, beta isoform (ppp1cb), mRNA	4.082	5.79	2.95475	10.762	5.2675	7.1745	6.901	7.84	7.015	6.469	7.896	11.438	7.453	10.309	14.772	18.035	3.943	7.911	7.593	4.7075	6.91	10.6783
gi|124001536|ref|NM_001080753.1| Danio rerio zgc:153243 (zgc:153243), mRNA	0.351	3.199	1.4825	0.1835	1.1655	1.3565	6.312	5.788	1.724	3.916	4.688	5.199	3.883	4.078	1.823	6.143	1.334	3.028	2.274	0.578	1.9715	6.66233
gi|124001540|ref|NM_001080751.1| Danio rerio B lymphoma Mo-MLV insertion region 1b (bmi1b), mRNA	1.292	0.561	0.03925	0.1935	0.526	0.058	1.907	1.088	0.605	1.259	1.345	0.864	0	2.503	3.07	1.01	0.602	3.684	1.006	0	1.0145	9.81667
gi|124107630|ref|NM_200698.2| Danio rerio zgc:73060 (zgc:73060), mRNA	0	0	0	0	0	0	0	0	0.181	0	0	0	0	0	0.344	0	3.24	13.405	0.09	0	0	2.03667
gi|124248492|ref|NM_001080799.1| Danio rerio si:ch211-244b2.1 (si:ch211-244b2.1), mRNA	0.113	0.069	0.33275	0.444	0.1445	0.177	0.227	0	0.248	0.141	0.207	0.177	0.342	0	0	0.124	0.062	0.795	0.594	0	0.3025	1.02333
gi|124248496|ref|NM_001080802.1| Danio rerio sodium channel, voltage-gated, type III, beta (scn3b), mRNA	0	0	0.2025	0	0	0	0	0	0	0	0	0	0	0	0	0	0.367	1.275	0.334	0	0	0.463
gi|124248498|ref|NM_001080804.1| Danio rerio si:dkey-205o12.6 (si:dkey-205o12.6), mRNA	0.875	0.532	0.66175	0.229	0.07	0.3095	0.583	0.773	0.239	0.136	0.266	0	0	0.254	0.455	0	0.357	0.354	0.454	0.108	1.175	0
gi|124248500|ref|NM_001080801.1| Danio rerio si:ch211-245j22.3 (si:ch211-245j22.3), mRNA	0	1.763	0.03675	0	0.185	0.0835	0.386	0	0	0	0	0	0	0	0	0	0.63	0	0.2365	0	0	0
gi|124248504|ref|NM_001080803.1| Danio rerio acyl-CoA thioesterase 13 (acot13), mRNA	5.374	15.926	8.03075	0	3.819	0.712	25.294	11.084	2.2	14.997	10.2	7.335	2.704	8.329	8.379	12.499	2.92	6.523	10.26	4.936	1.2585	3.13833
gi|124248506|ref|NM_001080806.1| Danio rerio RAP1 interacting factor homolog (yeast) (rif1), mRNA	1.067	0.423	0.16725	0.2185	0.893	0.623	0.819	1.585	0.253	0.604	0.817	0.615	0.513	0.395	1.543	0.609	0.252	0.35	2.1075	0.3135	0.505	17.9333
gi|124248509|ref|NM_001080807.1| Danio rerio si:dkey-265o13.4 (si:dkey-265o13.4), mRNA	4.999	3.296	1.302	1.4135	5.313	2.90475	2.259	4.793	1.018	2.469	2.419	0.33	1.449	1.641	3.171	1.391	1.381	1.417	3.956	2.091	1.216	0.879
gi|124248588|ref|NM_131734.3| Danio rerio glutathione S-transferase pi (gstp1), mRNA	1041.07	1935	1400.27	1521.68	4289.87	3951.19	2072.3	5909.36	2420.15	2045.8	1917.72	1089.08	1846.68	1127.17	855.741	1261.31	1264.47	929.513	2841.15	734.4	1117.34	56.2277
gi|124249093|ref|NM_207641.2| Danio rerio pancreas specific transcription factor, 1a (ptf1a), mRNA	0	0	0	0	0	0	0	0	0	0	0	0	0	0	0	0	0	0	0.076	0	0	0.695
gi|124286792|ref|NM_001080199.2| Danio rerio piwi-like 2 (Drosophila) (piwil2), mRNA	0	1.297	0	0.0485	0.0295	0.01325	2.041	0.656	0	0.575	0.169	1.013	0	9.455	5.498	0.102	0.605	5.106	0.1135	0.046	0.0865	6.28633
gi|124377981|ref|NM_001039525.2| Danio rerio taste receptor, type 1, member 1 (tas1r1), mRNA	0	0.084	0.29225	0	0	0	0.046	0.162	0.075	0.085	0	0	0	0	0	0	0	0	0.0185	0	0	0
gi|124430501|ref|NM_001080986.1| Danio rerio si:ch211-154o6.4 (si:ch211-154o6.4), mRNA	2.053	0	0.3445	0	0.241	0	0	0	0	0	0	2.001	0	0	0	0	0	0.277	0	0	0	0
gi|124430507|ref|NM_001080994.1| Danio rerio si:dkeyp-87e7.3 (si:dkeyp-87e7.3), mRNA	0	0	0	0.249	0	0.149	0	0	0	0	0.577	0	0	0.184	0	0.52	0	0	0	0	0	0.021
gi|124430515|ref|NM_001080987.1| Danio rerio cysteine-rich, angiogenic inducer, 61 (cyr61), mRNA	0	0.734	0.03075	0.4605	0	0.05825	0.774	0.547	0	0.403	0.79	1.014	0.093	0.576	1.158	0.711	0.101	1.253	0.0775	0.165	0.1	0.795667
gi|124430519|ref|NM_001080988.1| Danio rerio zgc:158411 (zgc:158411), mRNA	0	0.448	0	0	0	0	0.327	0.145	0	0.381	0	0	0	0.619	0.383	0	0.133	0.265	0.7865	0	0.428	4.757
gi|124430523|ref|NM_001080990.1| Danio rerio milk fat globule-EGF factor 8 protein b (mfge8b), mRNA	0.769	1.403	0.29675	0.5515	0.385	0.1215	1.089	2.72	0.595	4.095	12.809	0.55	1.354	0.795	2.266	1.333	1.289	11.551	1.1895	0.262	2.445	1.71533
gi|124430527|ref|NM_001080993.1| Danio rerio zgc:158350 (zgc:158350), mRNA	3.09	2.003	0.9105	1.1015	1.289	0.33175	1.27	2.063	0.281	0.703	1.501	1.607	3.523	2.634	2.355	2.48	0.839	0.611	1.5165	3.1355	0.6625	0.604333
gi|124430732|ref|NM_200992.2| Danio rerio PDS5, regulator of cohesion maintenance, homolog A (S. cerevisiae) (pds5a), mRNA	4.979	2.62	1.5065	1.4545	3.65	2.6715	2.13	4.116	1.136	1.797	2.844	1.855	3.439	2.131	0.618	3.091	1.817	3.769	3.2365	1.8345	1.563	16.2263
gi|124430734|ref|NM_201182.2| Danio rerio BCS1-like (yeast) (bcs1l), nuclear gene encoding mitochondrial protein, mRNA	0.999	1.943	0.97975	0.314	2.1175	2.30425	2.263	2.59	0.654	2.478	1.82	1.558	0	0.619	3.531	0.875	0.109	0	4.1215	0	0.452	2.218
gi|124430736|ref|NM_205574.2| Danio rerio parvalbumin 7 (pvalb7), mRNA	1.588	0	0	0	0	0	0.318	0	0	0	0.193	0.496	4.155	2.092	0	1.043	0.173	0	0	0	0	56.5687
gi|124430738|ref|NM_130931.2| Danio rerio solute carrier family 39 (zinc transporter), member 7 (slc39a7), mRNA	22.593	10.533	20.5663	19.5095	52.4325	44.507	18.962	18.419	21.794	11.904	9.183	2.782	17.947	5.858	2.296	5.206	4.246	8.615	20.6075	4.7635	12.3495	6.95867
gi|124430740|ref|NM_001003727.2| Danio rerio kelch-like 31 (Drosophila) (klhl31), mRNA	0	0.049	0.11325	0.042	0.0895	0	0.054	0.19	0.088	0	0	0	0	0	0.084	0	0.131	0.043	0.203	0	0.087	12.3947
gi|124430741|ref|NM_213122.2| Danio rerio SRY-box containing gene 4a (sox4a), mRNA	3.038	5.294	2.7835	0.5555	4.6495	9.59225	5.736	2.745	0.663	6.406	7.381	5.924	7.54	5.846	3.79	5.209	1.871	3.059	3.374	0.4835	2.8565	2.18433
gi|124430746|ref|NM_001040376.2| Danio rerio protein kinase containing Z-DNA binding domains (pkz), mRNA	1.271	3.013	2.049	0.2315	0.701	0.37175	3.261	3.745	0.347	3.941	5.172	1.884	2.174	2.758	7.267	3.339	3.384	6.24	2.0525	0.959	2.1455	1.34067
gi|124517648|ref|NM_001081440.1| Danio rerio heparan sulfate (glucosamine) 3-O-sulfotransferase 3-like (hs3st3l), mRNA	0	0	0	0	0	0	0	0.398	0	0.419	0	0	0	0	0	0	0	0	0.7465	0	0	0.175667
gi|124517652|ref|NM_001081439.1| Danio rerio heparan sulfate (glucosamine) 3-O-sulfotransferase 1-like1 (hs3st1l1), mRNA	0	0	0	0	0	0	0	0	0	0	0	0	0	0	0	0	0	0	0	0	0	0
gi|125628678|ref|NM_001081497.1| Danio rerio si:dkey-24l11.1 (si:dkey-24l11.1), mRNA	0	0	0	0	0	0	0	0.188	0	0	0.097	0	0	0	0.166	0	0.087	0.086	0	0	0.2145	0.825
gi|125630293|ref|NM_194396.2| Danio rerio X-linked inhibitor of apoptosis (xiap), mRNA	2.485	4.721	1.7655	3.323	3.3575	2.425	4.917	5.675	1.866	5.587	2.264	2.181	1.719	4.273	8.235	6.12	1.604	4.274	4.5725	1.0545	3.146	6.99367
gi|125630298|ref|NM_001013277.2| Danio rerio guanine nucleotide binding protein (G protein) alpha 12 (gna12), mRNA	0.077	4.243	0.55425	0.201	1.7285	0.707	1.15	4.429	0.377	5.993	20.45	0.479	2.161	2.615	13.952	5.708	4.793	9.89	0.445	0.0985	0.904	1.384
gi|125630299|ref|NM_001001843.2| Danio rerio tryptophan hydroxylase 1b (tph1b), mRNA	1.417	0	0	0	0	0.104	0	0	0	0.098	0.096	0	0	0	0	0	0	0	0.9655	0	0	1.13467
gi|125630317|ref|NM_001013290.2| Danio rerio zgc:110758 (zgc:110758), mRNA	5.647	6.073	4.1575	13.841	8.863	11.5768	7.526	9.471	9.604	5.387	4.749	1.525	10.052	9.761	2.709	3.803	16.403	1.289	5.37	12.867	2.3115	0.221667
gi|125630319|ref|NM_181495.3| Danio rerio notch-regulated ankyrin repeat protein a (nrarpa), mRNA	133.226	198.346	69.3517	136.013	43.642	22.0242	178.214	88.779	84.972	41.707	64.787	12.927	23.732	21.818	42.63	15.465	49.646	39.722	96.782	21.541	95.42	1.703
gi|125630321|ref|NM_001045211.2| Danio rerio si:dkey-72l14.9 (si:dkey-72l14.9), mRNA	1.07	5.074	1.5845	0.7255	2.739	1.4775	4.921	3.027	1.753	2.389	2.21	11.853	13.675	19.115	18.466	15.343	1.977	6.466	1.2065	3.0045	3.952	1.716
gi|125630322|ref|NM_001045016.2| Danio rerio podocalyxin-like (podxl), mRNA	1.284	8.099	0.2455	0.272	0.077	0.0485	13.772	1.513	0	1.493	0.244	2.316	0.242	12.874	11.513	0.439	5.189	11.517	0.2555	0	0.6115	2.19767
gi|125630323|ref|NM_001044790.2| Danio rerio membrane-associated ring finger (C3HC4) 2 (march2), mRNA	0.598	0.727	0.31625	0.2085	0.882	0.45475	0.266	0.235	0.217	1.235	0.605	0	0.2	0	0.207	0.654	0.758	0.322	0.41	0.177	0.4785	1.39533
gi|125630327|ref|NM_001080163.2| Danio rerio small nuclear RNA activating complex, polypeptide 5 (snapc5), mRNA	0.88	1.606	0.3455	1.222	0.4625	0.35325	5.085	7.955	1.922	2.73	10.516	2.289	3.838	3.411	3.661	4.818	2.551	7.283	1.7935	1.992	4.3205	5.24733
gi|125656143|ref|NM_001081553.1| Danio rerio defensin, beta-like 1 (defbl1), mRNA	0.942	5.156	0	1.5975	0	1.0985	10.676	0.555	1.801	43.537	3.148	2117.88	1982.08	2075.48	2171.16	2267.93	642.581	43.721	1.3165	13.4605	2.0735	0.955
gi|125656145|ref|NM_001081555.1| Danio rerio defensin, beta-like 3 (defbl3), mRNA	0	0.362	0	0	0	0	0.199	0	0	0	0	0.465	0	0	0	0	0	0	0	0	0	0
gi|125656147|ref|NM_001081554.1| Danio rerio defensin, beta-like 2 (defbl2), mRNA	0	0	0	0	0	0	0	0	0	0	0	0	0	0.146	0	0	0	0	0	0	0	0
gi|125802762|ref|XM_001335706.1| PREDICTED: Danio rerio hypothetical protein LOC795531 (LOC795531), mRNA	0	0	0	0	0	0	0	0	0	0	0	0	0	0	0	0	0	0	0	0	0	0.101667
gi|125802928|ref|XM_001345605.1| PREDICTED: Danio rerio endonuclease domain-containing 1 protein-like (LOC100007088), mRNA	0	0	0	0	0	0	0	0	0	0	0.257	0	0	0	0	0	0	0	0	0	0	0
gi|125802951|ref|XM_001345817.1| PREDICTED: Danio rerio sodium/glucose cotransporter 5-like (LOC100007379), mRNA	0.532	0.646	1.1545	0.371	1.5065	0.37575	0.709	0.836	0.484	0.44	0.431	2.903	0.713	2.678	2.211	2.522	0.867	0.765	0.296	0.2745	0.238	0.443
gi|125803100|ref|XM_001336292.1| PREDICTED: Danio rerio si:dkeyp-75b4.8 (si:dkeyp-75b4.8), mRNA	0	0	0	0	0	0	0	0	0	0	0	0	0	0	0	0	0	0	0	0	0	1.805
gi|125803129|ref|XM_001338014.1| PREDICTED: Danio rerio carbohydrate sulfotransferase 12-like (LOC797576), mRNA	0	0	0	0	0	0	0	0	0	0	0	0	0	0	0	0	0	0	0	0	0	0
gi|125803165|ref|XM_701297.2| PREDICTED: Danio rerio hypothetical protein LOC566622 (LOC566622), mRNA	0	0	0	0	0	0	0	0	0	0	0	2.344	0	0	0	0	0	0	0	0	0	1.45633
gi|125803381|ref|XM_701067.2| PREDICTED: Danio rerio si:dkeyp-118a3.2 (si:dkeyp-118a3.2), mRNA	0	0.777	0.0135	0	0.5435	0.20975	0.639	1.005	0.349	0.396	0.388	0	0	0	0	0	0	0	0.2645	0	0	0
gi|125803523|ref|XM_001343052.1| PREDICTED: Danio rerio hypothetical protein LOC100003575 (LOC100003575), mRNA	0	0.046	0	0	0	0	0	0	0	0	0	0	0	0.029	0	0	0.123	0	0	0	0	0
gi|125803544|ref|XM_679228.2| PREDICTED: Danio rerio si:dkey-251e24.6 (si:dkey-251e24.6), mRNA	1.184	0.048	0.34025	0.0825	0.4015	0.32475	0.474	0.093	0.129	0.294	0.384	0	0	0	0	0.173	0.043	0	1.428	0.692	0.349	1.383
gi|125803846|ref|XM_001345382.1| PREDICTED: Danio rerio CXXC-type zinc finger protein 4-like (LOC100006754), mRNA	0	0	0	0	0	0	0	0	0	0	0	0	0	0	0	0	0	0	0	0	0	0
gi|125803969|ref|XM_685338.2| PREDICTED: Danio rerio serine/threonine-protein kinase PRKX-like (LOC561941), mRNA	0	0	0.02	0	0	0.2195	0.105	0	0.345	0	0.192	0	0	0.979	2.627	0	0	0	2.004	0	0	0.554667
gi|125803991|ref|XM_001344561.1| PREDICTED: Danio rerio si:dkey-24h22.4 (si:dkey-24h22.4), mRNA	0	0	0	0	0	0	0	0	0	0	0	0	0	0	0	0	0	0	0	0	0.0505	0.059
gi|125804020|ref|XM_689091.2| PREDICTED: Danio rerio si:ch211-237a6.7 (si:ch211-237a6.7), mRNA	0.596	0	0.01875	0	0	0.043	0.099	0	0	0.37	0	0	0	0	0	0	0.162	0.804	0.0405	0	0	0.291
gi|125804302|ref|XM_001337635.1| PREDICTED: Danio rerio 5-hydroxytryptamine receptor 4-like (LOC797212), mRNA	0	0	0	0	0	0	0	0	0	0	0	0	0	0	0	0	0	0	0	0	0	0
gi|125804304|ref|XM_691951.2| PREDICTED: Danio rerio alpha-1D adrenergic receptor-like (LOC568614), mRNA	0	0	0	0	0	0	0	0	0	0.143	0	0	0	0	0	0	0	0	0	0	0	0
gi|125804326|ref|XM_680463.2| PREDICTED: Danio rerio G-protein coupled receptor 26-like (LOC557394), mRNA	0	1.571	2.462	1.5225	3.619	1.52025	2.907	1.904	1.411	1.603	0.785	0	0	0.125	0	0	0.351	0.523	0	0.628	3.0325	0.189333
gi|125804385|ref|XM_694618.2| PREDICTED: Danio rerio mitochondrial sodium/hydrogen exchanger NHA2-like (LOC571064), mRNA	1.601	1.095	0.0425	0.105	0	0	0.333	0.944	0.109	0	0	0	0.403	0.465	0.832	0.219	0.652	0.432	1.697	0	0.0815	0
gi|125804394|ref|XM_701519.2| PREDICTED: Danio rerio si:dkey-22i16.7 (si:dkey-22i16.7), mRNA	0	0	0	0	0	0	0	0	0	0	0	0	0	0	0	0	0	0	0	0	0	1.02767
gi|125804510|ref|XM_681645.2| PREDICTED: Danio rerio sprouty-related, EVH1 domain-containing protein 2-like (LOC558432), mRNA	0	0	0	0	0.2995	0	0	0.248	0.115	0.13	0	0	0	0.244	0.218	0	0	0	0.265	0	0	0.356667
gi|125804531|ref|XM_001337952.1| PREDICTED: Danio rerio novel sulfotransferase domain containing protein (LOC797517), mRNA	0	0	0	0	0	0	0	0	0	0	0	0	0	0	0	0	0	0	0	0	0	0
gi|125804604|ref|XM_001336813.1| PREDICTED: Danio rerio wu:fc75a09 (wu:fc75a09), mRNA	0.378	0.46	0	0	0	0.077	0	0	0	0	0	0	0	0	0	0	0.616	0	0	0	0	0.655667
gi|125804657|ref|XM_001342094.1| PREDICTED: Danio rerio zinc finger protein 84-like (LOC100002322), mRNA	0	0	0	0	0	0	0	0	0	0	0	0	0	0	0	0	0	0	0	0	0	0
gi|125804667|ref|XM_001342519.1| PREDICTED: Danio rerio hypothetical protein LOC100002885 (LOC100002885), mRNA	0	0.279	0.26825	0.24	0	0	0.153	1.081	0.751	0.284	0.557	0.715	1.384	0.71	0.477	0	0.996	2.721	0.5695	0.0755	0	0.0456667
gi|125804707|ref|XM_001343437.1| PREDICTED: Danio rerio GTPase IMAP family member 8-like (LOC100004078), mRNA	0	0	0	0.176	0	0	0	0	0	0	0	0	0	0	0.35	0	0	0	0	0	0	0
gi|125804754|ref|XM_001344940.1| PREDICTED: Danio rerio ras-related C3 botulinum toxin substrate 1-like (LOC100006132), mRNA	0	0	0	0	0	0	0	0	0	0	0	0	0	0	0	0	0	0	0	0	0	0
gi|125805055|ref|XM_695503.2| PREDICTED: Danio rerio si:dkey-9i23.6 (si:dkey-9i23.6), mRNA	0	0	0	0	0	0	0	0	0	0	0	0	0	0	0	0	0	0	0	0	0	1.015
gi|125805059|ref|XM_001341496.1| PREDICTED: Danio rerio si:dkey-9i23.8 (si:dkey-9i23.8), mRNA	0	0	0	0	0	0	0	0	0	0	0	0	0	0	0	0	0	0	0	0	0	0
gi|125805217|ref|XM_001337507.1| PREDICTED: Danio rerio protein fuzzy homolog (LOC797090), mRNA	0	0	0	0	0	0	0.09	0	0.147	0.5	0	0	0	0	0	0	0	0	0.073	0	0	1.11867
gi|125805380|ref|XM_001343648.1| PREDICTED: Danio rerio interleukin-12 subunit alpha-like (LOC100004358), mRNA	0	0	0	0	0	0	0	0	0	0	0	0	0	0	0	0	0	0	0	0	0	0
gi|125805577|ref|XM_685062.2| PREDICTED: Danio rerio olfactomedin 3 (olfm3), mRNA	0	0	0	0	0	0	0.329	0	0	0	0	0	0	0	0	0	0	0	0	0	0	0
gi|125805799|ref|XM_689301.2| PREDICTED: Danio rerio myosin VIIBb (myo7bb), mRNA	0	0	0	0	0	0	0	0	0	0	0	0	0	0	0	0	0	0	0	0	0.014	1.05667
gi|125805820|ref|XM_001346142.1| PREDICTED: Danio rerio solute carrier family 22 member 6-like (LOC100007819), mRNA	0.434	0	0	0	0	0	0	0	0	0	0	0	0	0	0	0	0	0	0	0	0	0.00466667
gi|125805882|ref|XM_001334534.1| PREDICTED: Danio rerio angiotensin II receptor, type 1-like (LOC794575), mRNA	0	0	0.35325	0	0	0	0.21	0	0	0	0	0	0	0	0	0	0	0	0	0	0	0.244333
gi|125805890|ref|XM_687862.2| PREDICTED: Danio rerio cohesin subunit SA-3-like (LOC564533), mRNA	0.168	0.459	0.05625	0.044	0.0535	0.41375	0.196	0	0.046	0.208	0.051	0	0	0	0	0	0.593	1.586	1.219	0.047	0.125	0.002
gi|125805912|ref|XM_689111.2| PREDICTED: Danio rerio novel protein similar to vertebrate protein phosphatase 2 (formerly 2A), regulatory subunit B'', alpha (PPP2R3A) (LOC565849), mRNA	0	0.059	0.02075	0	0	0.014	0	0	0.053	0.181	0.118	0.303	0.195	0.188	0	0.532	0	0.105	0.422	0	0.1165	0.337333
gi|125805918|ref|XM_689540.2| PREDICTED: Danio rerio high affinity cationic amino acid transporter 1-like (LOC566270), mRNA	0	0	0	0	0	0	0	0	0	0.178	0.35	0.112	0	0	0	0	0	0	0	0	0.155	0.546667
gi|125805929|ref|XM_687068.2| PREDICTED: Danio rerio bestrophin-4-like (LOC563711), mRNA	0	0	0.0335	0	0	0	0	0	0	0	0	0	0	0	0	0	0	0	0.036	0	0	0.129
gi|125805940|ref|XM_691410.2| PREDICTED: Danio rerio dermatan sulfate epimerase-like (dsel), mRNA	0	0	0	0	0	0	0.032	0	0	0	0	0	0	0	0	0	0	0	0	0	0	0.121667
gi|125806096|ref|XM_001343852.1| PREDICTED: Danio rerio hypothetical protein LOC553366 (LOC553366), mRNA	0.896	0	0	0	0	0	0	0	0	0	1.089	2.098	0	0	0	0.392	0	0	1.068	0.13	0	0.675333
gi|125806475|ref|XM_689266.2| PREDICTED: Danio rerio novel protein similar to vertebrate pentraxin-related gene, rapidly induced by IL-1 beta (PTX3) (LOC566001), mRNA	0	0	0	0	0	0	0	0	0	0	0	0	0	0	0	0	0	0	0	0.043	0	0.930333
gi|125806892|ref|XM_001337820.1| PREDICTED: Danio rerio finTRIM family, member 6, transcript variant 1 (ftr06), mRNA	0	0	0	0	0	0	0	0	0	0	0	0	0	0	0	0	0	0	0	0	0	0
gi|125806914|ref|XM_001338596.1| PREDICTED: Danio rerio si:ch211-283p23.1 (si:ch211-283p23.1), mRNA	0	0	0	0	0	0	0	0	0	0	0	0	4.35	0.515	0	0	0.181	0	0	0	0	0
gi|125807410|ref|XM_001343526.1| PREDICTED: Danio rerio hypothetical protein LOC100004199 (LOC100004199), mRNA	0	0	0	0	0	0	0	0	0	0	0	0	0	0	0	0	0	0	0	0	0	0.754333
gi|125807785|ref|XM_001333200.1| PREDICTED: Danio rerio hypothetical protein LOC793474 (LOC793474), mRNA	0	0	0	0	0	0	0	0	0	0	0	0	0	0	0	0	0	0	0	0	0	0.312333
gi|125807806|ref|XM_001333729.1| PREDICTED: Danio rerio G-protein coupled receptor 55-like (LOC793909), mRNA	0	0	0	0	0	0	0	0	0	0	0	0	0	0	0	0	0	0	0	0	0	0.0556667
gi|125808574|ref|XM_001336673.1| PREDICTED: Danio rerio histone H2A-like (LOC100004171), mRNA	0.877	0	1.21775	0	0	0	0	0	0.479	1.631	1.597	2.735	0	0	0	0	0	0	0	0.289	0	0
gi|125808578|ref|XM_001336749.1| PREDICTED: Danio rerio histone H4-like (LOC100004227), mRNA	0	0	0.1885	0	0	0	0	0	0	0	0	0	0	0	0	0	0	0	0	0	0	0.541333
gi|125809686|ref|XM_001345702.1| PREDICTED: Danio rerio hypothetical protein LOC100007229 (LOC100007229), mRNA	0.424	1.03	0.65525	0.2215	0.135	1.14925	0.564	0	0.694	0	0	0	0	0	0	0	0	0	0.115	0.07	0	0
gi|125810207|ref|XM_001336163.1| PREDICTED: Danio rerio mucolipin-1-like (LOC795916), mRNA	0	0	0	0	0	0.075	0	0	0	0	0	0	0	0	0	0	0	0	0	0	0	0.047
gi|125811198|ref|XM_001332620.1| PREDICTED: Danio rerio hypothetical protein LOC793004 (LOC793004), mRNA	1.57	1.432	1.6475	1.948	5.577	2.11075	2.617	4.165	1.715	3.165	8.108	3.369	15.012	7.759	6.122	13.751	7.467	5.296	5.4175	1.281	4.4765	0.747667
gi|125811443|ref|XM_679922.2| PREDICTED: Danio rerio gap junction gamma-1 protein-like, transcript variant 1 (LOC564307), mRNA	0	0	0	0	0	0	0	0	0	0	0	0	0	0	0	0	0	0	0	0	0	0
gi|125811790|ref|XM_001338949.1| PREDICTED: Danio rerio hypothetical protein LOC798544 (LOC798544), mRNA	0	0.31	0	0.1335	0.081	0.1035	0.17	0.3	0	0.474	0.155	0.397	0	0	0	0	0.277	1.374	0.539	0.2265	0.0675	0.0223333
gi|125811818|ref|XM_001339543.1| PREDICTED: Danio rerio tetraspanin-10-like (LOC799194), mRNA	95.848	294.199	212.209	165.285	788.107	293.657	339.743	560.042	183.318	453.978	288.991	38.847	83.52	33.619	9.117	37.711	91.397	114.915	293.238	67.3385	78.272	0
gi|125812110|ref|XM_687176.2| PREDICTED: Danio rerio tripartite motif-containing protein 35-like (LOC563812), mRNA	0	0.148	0.0155	0	0	0	0	0	0	0.151	0.148	0	0	0.283	0	0	0	0	0	0	0	0.046
gi|125812139|ref|XM_686381.2| PREDICTED: Danio rerio neurexophilin-1-like (LOC563017), mRNA	0	0	0	0	0	0	0	0	0	0	0	0	0	0	0	0	0	0	0	0.0655	0	0
gi|125812163|ref|XM_678910.2| PREDICTED: Danio rerio serine/threonine-protein kinase TAO2-like (LOC556172), mRNA	3.434	0.749	3.48825	1.012	3.3025	1.73725	1.467	2.075	1.202	2.129	1.39	1.099	2.835	1.058	1.098	1.831	1.34	3.515	1.806	2.904	6.2	3.13333
gi|125812178|ref|XM_691254.2| PREDICTED: Danio rerio corticotropin releasing hormone receptor 1 (crhr1), mRNA	0	0	0.01825	0	0.299	0	0	0.247	0	0.26	0	0	0	0	0	0	0	0.339	0	0.1865	0.3625	0
gi|125812241|ref|XM_001337673.1| PREDICTED: Danio rerio GTPase IMAP family member 4-like (LOC797253), mRNA	0	0	0	0	0	0	0	0	0	0	0	0	0	0	0	0	0	0	0	0	0	0
gi|125812377|ref|XM_686662.2| PREDICTED: Danio rerio similar to N-methyl-D-aspartate receptor channel subunit epsilon 1 (LOC563297), mRNA	0	0.047	0	0	0.025	0	0	0	0	0	0	0	0	0	0	0	0	0	0	0	0	0.0626667
gi|125812468|ref|XM_688757.2| PREDICTED: Danio rerio chondroadherin-like protein-like (LOC565474), mRNA	0	0.081	0	0	0	0	0	0	0	0	0	0	0.135	0	0	0	0	0	0.057	0	0	0.006
gi|125812529|ref|XM_001339132.1| PREDICTED: Danio rerio GTPase IMAP family member 4-like (LOC798736), mRNA	0	0	0.059	0	0	0	0.226	0.4	0	0.421	0	0	0	0	0	0	1.106	1.647	0.092	0	0	0.856333
gi|125812562|ref|XM_692828.2| PREDICTED: Danio rerio perforin-1-like (LOC569443), mRNA	0	0	0	0	0	0	0	0	0	0	0	0	0.386	0.074	0	0	0	0	0	0	0	0
gi|125812591|ref|XM_688905.2| PREDICTED: Danio rerio progestin and adipoQ receptor family member 4-like, transcript variant 1 (LOC568196), mRNA	0	0.231	0	0	0.598	0.238	0.126	0	0	0	0.23	0	0	0	0	0	0	0	0	0	0.5095	0.134
gi|125812593|ref|XM_704577.2| PREDICTED: Danio rerio hypothetical protein LOC569097, transcript variant 2 (LOC569097), mRNA	6.9	4.294	6.955	2.6545	4.491	2.95175	6.24	5.615	3.767	6.52	5.588	0.897	8.43	7.575	8.026	4.675	12.764	3.634	5.7095	2.701	7.1375	3.538
gi|125812766|ref|XM_691875.2| PREDICTED: Danio rerio carbonic anhydrase-related protein 10-like (LOC568543), mRNA	0	0	0	0	0	0	0	0	0	0.209	0.204	2.362	0.339	2.999	1.399	2.21	0	0	0.183	0.7095	0.137	0.00733333
gi|125812889|ref|XM_001341462.1| PREDICTED: Danio rerio serine protease 27-like (LOC100001520), mRNA	0	0	0	0	0	0	0	0	0	0	0	0	0	0	0	0	0	0	0	0	0	0
gi|125812925|ref|XM_686752.2| PREDICTED: Danio rerio hypothetical protein LOC563388 (LOC563388), mRNA	0.337	3.072	0.47925	0.966	0.215	0.15425	2.47	1.985	0.368	2.507	2.865	0.263	1.356	4.177	3.502	2.581	1.83	3.817	0.7975	0	0.7265	0.599667
gi|125813010|ref|XM_692911.2| PREDICTED: Danio rerio cyclin-dependent kinase 6-like (LOC569515), mRNA	0	0	0	0	0	0	0	0	0	0	0	0	0	0	0	0	0	0	0	0	0	0
gi|125813061|ref|XM_684769.2| PREDICTED: Danio rerio hypothetical protein LOC561360 (LOC561360), mRNA	0	0	0	0	0	0	0	0	0	0	0	0	0	0	0	0	0	0	0	0	0	0.012
gi|125813082|ref|XM_001334457.1| PREDICTED: Danio rerio urotensin-2 receptor-like (LOC794519), mRNA	0	0	0	0	0	0	0	0	0	0	0	0	0	0	0	0	0	0	0	0	0	0
gi|125813134|ref|XM_001339133.1| PREDICTED: Danio rerio galanin receptor type 2-like (LOC798737), mRNA	0	0.544	0.351	0.156	0	0.27325	0.099	2.813	0.163	0.37	0.181	0	0.901	0.347	0	0	0.162	0	0	0	0	0
gi|125813201|ref|XM_001342858.1| PREDICTED: Danio rerio hypothetical protein LOC100003293 (LOC100003293), mRNA	0	0	0.665	0	0.172	0.16925	0	0	0	0	0.328	0.421	0	0	0.561	0	0	0	0.22	0	0.286	0
gi|125813462|ref|XM_694758.2| PREDICTED: Danio rerio voltage-dependent calcium channel gamma-1 subunit-like (LOC571193), mRNA	0	0	0	0	0	0	0	0	0	0	0	0	0	0	0	0	0	0	0	0	0	0
gi|125813589|ref|XM_684720.2| PREDICTED: Danio rerio similar to tripartite motif-containing 35 (LOC561314), mRNA	0	0	0	0	0	0	0	0	0	0	0	0	0	0	0	0	0	0	0	0	0	0
gi|125814106|ref|XM_001334696.1| PREDICTED: Danio rerio transmembrane protein 229A-like (LOC794725), mRNA	0	0	0	0	0	0.11525	0	0.433	0	0.228	0	0	0	0	0	0	0	0	0	0	0	0
gi|125814405|ref|XM_691652.2| PREDICTED: Danio rerio si:dkey-22l11.5 (si:dkey-22l11.5), mRNA	2.461	0.575	0.1925	0.099	0.8385	0.81075	1.577	1.562	0.207	1.291	1.495	0.295	0.19	1.174	0.787	0	0.514	0	0.9515	0.137	0.4585	4.47267
gi|125814547|ref|XM_678257.2| PREDICTED: Danio rerio astrocytic phosphoprotein PEA-15-like, transcript variant 1 (LOC557745), mRNA	3.453	0.525	0	0.452	1.101	2.218	0.575	2.035	0.471	0.535	1.573	0	0.869	0.334	0	0	0.938	0	0	0	0	0
gi|125814597|ref|XM_687050.2| PREDICTED: Danio rerio si:dkeyp-15g12.1 (si:dkeyp-15g12.1), mRNA	0	0	0	0	0	0.02625	0	0	0	0.113	0	0	0	0	0	0	0	0	0	0	0	0.117
gi|125814880|ref|XM_001345393.1| PREDICTED: Danio rerio hypothetical protein LOC100006767 (LOC100006767), mRNA	0	0.209	0	0	0	0.1075	0.114	0	0	0.213	0	0.535	0.345	0.133	0	0	0	0	0.093	0	0.412	0
gi|125815319|ref|XM_692045.2| PREDICTED: Danio rerio cystine/glutamate transporter-like (LOC568699), mRNA	3.019	5.183	5.131	3.8045	2.7795	1.7725	9.114	4.605	2.133	7.16	11.866	1.247	0.179	0.138	0	0.583	4.825	10.828	4.1435	0	9.456	0.617667
gi|125815552|ref|XM_691141.2| PREDICTED: Danio rerio serine/threonine protein kinase pim-2-like (LOC567836), mRNA	0	0	0	0	0	0	0	0	0	0	0	0	0	0	0	0	0	0	0	0	0	0
gi|125815608|ref|XM_694364.2| PREDICTED: Danio rerio claudin-7-like (LOC570842), mRNA	0	0	0	0	0	0	0	0	0	0	0	0.77	0	0	0	0	0	0	0	1.6105	0	0
gi|125815650|ref|XM_693515.2| PREDICTED: Danio rerio MAX dimerization protein 1 (mxd1), mRNA	0	0.176	0.23525	0	0	0.24	0.193	0	0	0	0.176	0	0.291	0	0	0	0.157	0	0	0	0	0
gi|125815809|ref|XM_001342452.1| PREDICTED: Danio rerio probable G-protein coupled receptor 83-like (LOC100002786), mRNA	0	0.174	0	0	0	0	0	0	0	0	0	0	0	0	0	0	0	0	0	0	0	0
gi|125815855|ref|XM_692069.2| PREDICTED: Danio rerio hypothetical protein LOC568721 (LOC568721), mRNA	0	0	0	0	0	0	0	0	0	0	0.442	0	0	0	0	0	3.164	0	0	0	0	0
gi|125815877|ref|XM_001344418.1| PREDICTED: Danio rerio glycoprotein, alpha-galactosyltransferase 1-like (LOC100005375), mRNA	0	0	0	0	0	0	0	0	0	0	0	0	0	0	0	0	0	0	0	0	0	0
gi|125815949|ref|XM_679964.2| PREDICTED: Danio rerio novel protein similar to vertebrate aldehyde dehydrogenase 3 family (LOC557008), mRNA	9.686	37.794	53.5618	37.6715	44.637	14.352	41.508	33.982	20.291	52.944	41.181	1.406	5.213	2.444	0	3.698	32.802	43.264	14.0065	5.7225	31.132	0
gi|125815968|ref|XM_682863.2| PREDICTED: Danio rerio transmembrane protein 119a (tmem119a), mRNA	0	0	0	0	0	0	0	0	0.245	0	0	0.35	0	0.174	2.335	0	0	0	0	0	0	0.448667
gi|125815973|ref|XM_001335221.1| PREDICTED: Danio rerio chemokine-like receptor 1-like (LOC795147), mRNA	0	0	0	0	0	0	0	0	0	0	0	0	0	0	0	0	0	0	0	0	0	3.19167
gi|125815975|ref|XM_001335397.1| PREDICTED: Danio rerio hypothetical protein LOC795295 (LOC795295), mRNA	0	0	0	0	0	0	0	0	0	0	0	0	0	0	0	0	0	0	0	0	0	0
gi|125816201|ref|XM_682630.2| PREDICTED: Danio rerio ectonucleoside triphosphate diphosphohydrolase 2 a.2 (entpd2a.2), mRNA	0	0	0	0	0	0	0	0	0	0	0	1.182	0	0	0	0	0	0	0	0	0	0.0913333
gi|125816314|ref|XM_677671.2| PREDICTED: Danio rerio synaptic vesicle 2-related protein-like (LOC555216), mRNA	0	0	0	0	0	0	0	0	0	0	0	0	0	0	0	0	0	0	0	0	0	0
gi|125816316|ref|XM_694876.2| PREDICTED: Danio rerio si:dkey-202g15.9 (si:dkey-202g15.9), mRNA	0	0	0	0	0	0	0	0	0	0	0	0	0	0	0	0	0	0	0	0	0	0.0693333
gi|125816323|ref|XM_678793.2| PREDICTED: Danio rerio calcium binding protein 7-like (LOC556082), mRNA	0	0	0.0335	0.5535	0	0	0.176	0	0	0	0	0	0	0	1.099	0	1.436	4.276	0.728	0	0	0
gi|125816488|ref|XM_001344388.1| PREDICTED: Danio rerio cholesterol 25-hydroxylase-like (LOC100005337), mRNA	0	0	0	0	0	0	0.117	0	0	0	0	0	0	0.136	0	0	0	0	0	0	0.0935	0.541333
gi|125816496|ref|XM_001344583.1| PREDICTED: Danio rerio transmembrane protein 174 (tmem174), mRNA	0.908	0	0	0	0	0	0.076	0	0.124	0	0	0	0	0	0	0	5.055	0	0	0	0	0.180333
gi|125816518|ref|XM_685987.2| PREDICTED: Danio rerio transportin 1 (tnpo1), mRNA	0.127	0.308	0.155	0.0665	0.0405	0.161	0.127	0.149	0.208	0.472	0.077	0	0.128	0.147	0	0.139	0.138	1.026	0.017	0	0.204	0.342
gi|125816548|ref|XM_689815.2| PREDICTED: Danio rerio si:ch211-284e13.2 (si:ch211-284e13.2), mRNA	1.963	4.217	2.2895	12.075	17.2765	8.65075	5.321	14.191	9.36	23.051	30.207	0.612	0.395	1.318	1.769	2.435	5.76	6.708	0.876	0.233	1.2585	2.75267
gi|125816854|ref|XM_001336084.1| PREDICTED: Danio rerio piggyBac transposable element-derived protein 4-like (LOC795851), mRNA	0	0.235	0.1345	0	0	0.1165	0.129	0	0	0	0	0	0	0	0	0	0	0	0.135	0	0.2845	0.0796667
gi|125817178|ref|XM_001343336.1| PREDICTED: Danio rerio amyloid beta A4 precursor protein-binding family A member 1-like (LOC100003938), mRNA	0.35	0	0	0	0.2015	0	0	0	0	0.072	0	0.819	2.113	1.356	0.607	1.277	0.951	0	0.3715	0.6155	0	0.0633333
gi|125817394|ref|XM_681983.2| PREDICTED: Danio rerio si:dkey-261j4.10 (si:dkey-261j4.10), mRNA	4.196	3.139	2.68725	0.5875	2.138	0.7145	3.119	5.326	2.115	2.602	1.96	0	4.222	1.126	3.691	0.353	0.526	0	3.1005	2.074	1.2095	3.13267
gi|125817554|ref|XM_001334967.1| PREDICTED: Danio rerio protein FAM163B-like (LOC794939), mRNA	0	0	0	0	0	0	0	0	0	0.762	0	0	0	0	0	0	0	0	0	0	0	0
gi|125817663|ref|XM_686128.2| PREDICTED: Danio rerio si:ch211-271b14.7 (si:ch211-271b14.7), mRNA	3.212	0.391	2.79575	1.896	0	0.55575	1.713	0	0.818	0.531	0.26	1.503	0	0.581	0	0	0.465	0.231	3.03	0	3.2405	0.2
gi|125817816|ref|XM_001340224.1| PREDICTED: Danio rerio fibronectin type III and SPRY domain containing 1-like (fsd1l), mRNA	0	0	0.01175	0	0	0.0755	0	0	0	0	0	0	0	0	0	0	0	0	0	0	0	0.004
gi|125817958|ref|XM_001339788.1| PREDICTED: Danio rerio glial cell line-derived neurotrophic factor-like (LOC799472), mRNA	0	0	0	0	0	0	0	0	0	0	0	0	0	0	0	0	0	0	0	0	0	0
gi|125818005|ref|XM_001334832.1| PREDICTED: Danio rerio regulator of G-protein signaling protein-like (LOC798514), mRNA	0	0	0	0	0	0	0	0	0	0	0	0	0	0	0	0	0	0	0	0	0	0
gi|125818159|ref|XM_693899.2| PREDICTED: Danio rerio protein TSPEAR-like (LOC570420), mRNA	0	0	0	0	0	0	0	0	0	0	0	0	0	0	0	0	0	0	0	0	0	0
gi|125818171|ref|XM_001339338.1| PREDICTED: Danio rerio hypothetical protein LOC798967 (LOC798967), mRNA	0	0	0	0	0	0	0	0	0	0	0	0	0	0	0	0	0	0	0.023	0	0	0
gi|125818310|ref|XM_683178.2| PREDICTED: Danio rerio 5-hydroxytryptamine receptor 2A-like (LOC559806), mRNA	0	0	0.0155	0	0	0.07725	0.246	0	0	0.458	0	0.961	0.496	1.145	0	0.809	0	0	0.067	0	0.1305	0
gi|125818779|ref|XM_690464.2| PREDICTED: Danio rerio probable phospholipid-transporting ATPase VA-like (LOC567172), mRNA	0.211	0.128	0.009	0.037	0.2775	0.36125	0.141	0.083	0.038	0.742	0	1.758	2.409	1.091	1.098	1.542	0.191	0.608	0.4895	0.7935	0.0845	1.155
gi|125818804|ref|XM_686850.2| PREDICTED: Danio rerio PI-PLC X domain-containing protein 1-like (LOC563489), mRNA	0	0	0.225	0	0	0	0.109	0	0	0	0	1.786	0	0	0	0	0	0	0	0	0	0.257333
gi|125818815|ref|XM_001341533.1| PREDICTED: Danio rerio protein FAM5C-like (LOC100001603), mRNA	0	0.172	0.23075	0	0.157	0	0.283	0.167	0.077	0.088	0.172	0	0	0	0	0	0.077	1.376	0	0	0.1125	0.0486667
gi|125818869|ref|XM_001333393.1| PREDICTED: Danio rerio beta-1,4 N-acetylgalactosaminyltransferase 1-like (LOC793635), mRNA	0	0	0	0	0.135	0	0.141	0	0.115	0.262	0.128	0	0	0	0	0	0	0	0	0	0	0
gi|125818944|ref|XM_001337833.1| PREDICTED: Danio rerio wu:fl55e11 (wu:fl55e11), mRNA	1.194	0.087	0.656	0.386	0.332	0.433	0.302	0.394	0.391	0.089	0.029	0.112	0.192	0.148	0	0.105	0.104	0.361	0.881	0.2015	0.2745	5.355
gi|125819025|ref|XM_001340198.1| PREDICTED: Danio rerio transmembrane prolyl 4-hydroxylase-like (LOC799930), mRNA	0	0	0	0	0	0	0.074	0	0	0	0	0	0	0	0	0	0	0	0	0.53	0	0
gi|125819050|ref|XM_681781.2| PREDICTED: Danio rerio wu:fd16d01 (wu:fd16d01), mRNA	0	0.214	0.011	0	0	0	0.117	0	0	0	0	0	0	0	0	0	0.095	0	0	1.285	0	24.906
gi|125819107|ref|XM_690535.2| PREDICTED: Danio rerio caM kinase-like vesicle-associated protein-like (LOC567243), mRNA	0	0	0	0	0	0	0	0	0	0	0	0	0	0	0	0	0	0	0	0	0.268	0.24
gi|125819217|ref|XM_001336254.1| PREDICTED: Danio rerio RPE-spondin-like (LOC796009), mRNA	0	0	0	0	0	0.19525	0	0	0	0	1.296	0	0	0	0	0	0	0	0	0	0.46	0.151333
gi|125819300|ref|XM_681782.2| PREDICTED: Danio rerio tubulin beta-6 chain-like (LOC558552), mRNA	0.691	0	0	0	0	0	0	0	0	0	0	0	0	0	0	0	0	0	0.0315	8.6285	0.0935	0.183333
gi|125819378|ref|XM_001343041.1| PREDICTED: Danio rerio SAM pointed domain-containing Ets transcription factor-like (LOC100003543), mRNA	0	0	0.61075	0	0	0	0	0	0	0	0	0	0	0	0	0	0	0	0	0	0	0
gi|125819399|ref|XM_688840.2| PREDICTED: Danio rerio adenosine receptor A3-like (LOC565564), mRNA	0	0	0	0	0	0	0	0	0	0	0	0	0	0	0	0	0	0	0	0	0	0
gi|125819640|ref|XM_001344897.1| PREDICTED: Danio rerio hypothetical protein LOC100006062 (LOC100006062), mRNA	0	1.025	0	0	0	0	0	0.497	0	0	0	1.643	0	0	0	0	0	0	0	0.4445	0	0.496667
gi|125819645|ref|XM_001338290.1| PREDICTED: Danio rerio calcium/calmodulin-dependent protein kinase II inhibitor 1b (camk2n1b), mRNA	0	0	0	0	0	0	0	0	0	0	0	0	0	0	0	0	0	0	0	0	0	0
gi|125819790|ref|XM_001337986.1| PREDICTED: Danio rerio voltage-dependent calcium channel gamma-4 subunit-like (LOC797554), mRNA	0	0	0	0	0	0	0	0	0	0	0	0	0	0	0	0	0	0	0	0	0	0
gi|125820093|ref|XM_701470.2| PREDICTED: Danio rerio hypothetical protein LOC570738 (LOC570738), mRNA	1.978	1.002	0.3075	0.7725	1.6205	1.19925	1.318	0.389	0.72	0.409	0.601	0	0	2.299	2.742	2.165	0	0	0.6525	5.519	0.0875	0.854333
gi|125820275|ref|XM_001343791.1| PREDICTED: Danio rerio receptor-interacting serine-threonine kinase 3 like (ripk3l), mRNA	0	0	0	0	0	0.0315	0	0	0.12	0.136	0.133	2.906	0	0	0	0.24	0	0	0.799	0.715	0	0.089
gi|125820277|ref|XM_683765.2| PREDICTED: Danio rerio hypothetical protein LOC560359 (LOC560359), mRNA	0	0	0	0	0.1275	0	0.091	0	0	0.169	0	2.12	8.205	5.055	1.13	0.595	0	0	0	0.3765	0	0.324667
gi|125820441|ref|XM_685789.2| PREDICTED: Danio rerio hypothetical LOC562403 (LOC562403), mRNA	0.665	0	0.03675	0	0	0	0.089	0	0.073	0	0.162	15.565	0	0	0	0	0.217	0.215	0	0.1095	0	1.25733
gi|125820553|ref|XM_001335178.1| PREDICTED: Danio rerio histone H2B 1/2-like (LOC100000857), mRNA	0	0	0	1.647	0	0	0.301	0	0	0	0	1.411	0	1.402	0	0	4.424	0	0.632	0	0	0
gi|125820557|ref|XM_001335354.1| PREDICTED: Danio rerio histone H2A-like (LOC100001004), mRNA	0.652	0	0.211	0	0	0.3595	0	0	0	0	0.792	0	0	0	0	0	0	0	0	0	0	0.403667
gi|125820563|ref|XM_688487.2| PREDICTED: Danio rerio histone H2A-like (LOC565202), mRNA	0	0	0.228	0	0	0	0.292	0	0.479	0	0.532	0	0	0	0	0	0	0	0	0	0	1.55767
gi|125820707|ref|XM_681258.2| PREDICTED: Danio rerio hypothetical protein LOC558087 (LOC558087), mRNA	0	0	0.0055	0	0	0	0.03	0	0	0	0.054	0	0	0	0	0	0.096	0.191	0	0	0.047	0
gi|125820744|ref|XM_677895.2| PREDICTED: Danio rerio aminopeptidase N-like, transcript variant 1 (LOC555478), mRNA	0	0.257	0.15875	0.8245	0.737	0.086	0.528	1.618	0.115	0.982	1.54	0	0	0	0	0	0.23	1.538	0.367	0.0175	0.312	0.156
gi|125820791|ref|XM_680740.2| PREDICTED: Danio rerio somatostatin receptor type 1-like (LOC557645), mRNA	0	0	0	0	0	0	0	0	0	0	0	0	0	0	0	0	0	0.164	0	0	0	0
gi|125820801|ref|XM_001338901.1| PREDICTED: Danio rerio uncharacterized protein C4orf44 homolog (LOC798497), mRNA	14.803	11.999	1.218	6.326	11.048	2.1065	7.262	3.877	4.714	4.845	3.996	8.98	18.618	7.488	3.42	5.851	4.245	0	4.046	5.271	2.9725	0
gi|125820810|ref|XM_683615.2| PREDICTED: Danio rerio similar to RNA (guanine-9-) methyltransferase domain containing 2 (LOC560222), mRNA	0.86	0.871	0.93425	1.943	4.618	2.906	1.623	4.052	2.816	0.888	0.174	0	5.189	1.332	1.489	5.017	0	0	3.358	5.976	1.114	12.3533
gi|125820827|ref|XM_001340200.1| PREDICTED: Danio rerio c-type mannose receptor 2-like (LOC799932), mRNA	0	0	0	0	0	0	0	0	0	0	0	0	0	0	0	0	0	0	0	0	0	0
gi|125820896|ref|XM_001342820.1| PREDICTED: Danio rerio putative N-acetyltransferase C7orf52-like (LOC100003245), mRNA	1.01	0.614	0.07975	0.6125	0	0.31675	0	0	0	0.626	0	0	0	0	0	0	0	0	0	0	0	0.334333
gi|125820945|ref|XM_692022.2| PREDICTED: Danio rerio tubby homolog (mouse) (tub), mRNA	0	0	0	0	0	0	0	0	0	0	0	0	0	0	0	0	0	0	0	0	0	0.336333
gi|125820998|ref|XM_001334189.1| PREDICTED: Danio rerio probable ubiquitin carboxyl-terminal hydrolase 46-like (LOC794291), mRNA	0	0	0	0	0	0	0	0	0	0	0	0	0	0	0	0	0	0	0	0	0	0
gi|125821046|ref|XM_701384.2| PREDICTED: Danio rerio hypothetical protein LOC569091 (LOC569091), mRNA	0	0	0	0	0.113	0	0	0	0	0.448	0	0	0	0	0	0	0	0	0	0	0	0
gi|125821239|ref|XM_679092.2| PREDICTED: Danio rerio endonuclease domain-containing 1 protein-like (LOC556323), mRNA	0	0	0	0	0	0	0	0	0	0	0	0	0	0	0	0	0	0	0	0	0	0
gi|125821241|ref|XM_001343427.1| PREDICTED: Danio rerio endonuclease domain-containing 1 protein-like (LOC100004057), mRNA	0	0	0	0	0	0	0	0	0	0	0	0	0	0	0	0	0	0	0	0	0	0
gi|125821280|ref|XM_680670.2| PREDICTED: Danio rerio H(+)/Cl(-) exchange transporter 5-like (LOC557584), mRNA	0.139	0.085	0.11325	0	0.243	0.092	0.371	0.164	0.456	0.777	0.592	0	0	0.54	0	0	0	0	0.0945	0	0.8025	1.813
gi|125821329|ref|XM_001341831.1| PREDICTED: Danio rerio cholinergic receptor, nicotinic, beta 1 (muscle) (chrnb1), mRNA	0	0	0	0	0	0	0	0	0	0	0	0	0	0	0	0	0	0	0	0	0	0.408
gi|125821339|ref|XM_685678.2| PREDICTED: Danio rerio serine/threonine-protein phosphatase 2A 56 kDa regulatory subunit beta isoform-like (LOC562282), mRNA	1.014	0.247	0.242	0	0.095	0.11175	0.068	0.239	0.111	0.252	0.123	0	0	0	0	0	0.11	0	0	0	0	0.063
gi|125821359|ref|XM_001345062.1| PREDICTED: Danio rerio hypothetical protein LOC100006302 (LOC100006302), mRNA	0	1.509	0	0	0	0.0795	0.368	2.6	0	0.171	1.675	0	0	0.321	1.147	0.302	0.3	6.249	0.075	0.6725	0	1.364
gi|125821469|ref|XM_692273.2| PREDICTED: Danio rerio docking protein 4-like (LOC568912), mRNA	0.34	0	0.2495	0	0	0	0.339	0.4	0.185	0	0.412	0	0	0	0	0.743	0	0	0.145	0	0.228	0.0753333
gi|125821602|ref|XM_678371.2| PREDICTED: Danio rerio intelectin-1a-like (LOC555755), mRNA	0	0	0	0	0	0	0	0	0	0	0	0	0	0	0	0	0	0	0	0	0	0.008
gi|125821811|ref|XM_687829.2| PREDICTED: Danio rerio protein inhibitor of activated STAT, 1 (pias1), mRNA	0.176	0	1.06625	0.6885	0	0.076	0.352	0	0.48	0	0	0.137	1.062	0	0.183	0	0	0.095	0	0	0	0.130333
gi|125821846|ref|XM_683629.2| PREDICTED: Danio rerio coronin, actin binding protein, 2Ba (coro2ba), mRNA	0	1.129	0.88225	0	2.3485	2.298	0.077	3.01	0.127	0.72	0.846	0	0.234	0	0	0	0.378	0	0	0.0385	0	0.108333
gi|125821881|ref|XM_001333131.1| PREDICTED: Danio rerio zinc finger protein 408-like (LOC793421), mRNA	0.292	0	0	0	0.5315	0.2665	0.146	0	0.08	0.091	0.266	0	0	0.283	0	0	0.079	0	1.497	0	0.3125	0.348333
gi|125821888|ref|XM_690408.2| PREDICTED: Danio rerio solute carrier family 7 (cationic amino acid transporter, y+ system), member 9 (slc7a9), mRNA	2.678	11.532	10.7617	5.0085	12.337	7.88225	13.684	6.05	7.92	7.059	4.202	1.915	0.449	0.346	0.464	0.733	3.395	7.586	9.9885	0.0735	2.809	1.79867
gi|125821896|ref|XM_001334286.1| PREDICTED: Danio rerio arylamine N-acetyltransferase, pineal gland isozyme NAT-10-like (LOC794381), mRNA	0	0	0	0	0	0	0	0	0	0	0	0	0	0	0	0	0	0	0	0	0	0
gi|125822062|ref|XM_682870.2| PREDICTED: Danio rerio protein tyrosine phosphatase, non-receptor type 5 (ptpn5), mRNA	0	0	0	0	0	0	0	0	0	0	0	0	0	0	0	0	0.118	0	0.0295	0	0	0.036
gi|125822208|ref|XM_687796.2| PREDICTED: Danio rerio sc:d0316 (sc:d0316), mRNA	0	0	0	0	0	0.056	0.238	0	0	0	0	0	0.18	0	0	0	0	0	0	0	0.1205	0.0516667
gi|125822231|ref|XM_681604.2| PREDICTED: Danio rerio similar to USP6 N-terminal like (LOC558401), mRNA	0	0	0.048	0.0935	0	0	0.06	0	0	0	0.109	0	0	0	0	0	0	0.193	0	0	0.2155	0.0593333
gi|125822386|ref|XM_693928.2| PREDICTED: Danio rerio solute carrier organic anion transporter family member 3A1-like (LOC570448), mRNA	0	0	0	0	0	0	0	0	0	0	0	0	0	0	0	0	0	0	0	0	0	0.125
gi|125822554|ref|XM_682404.2| PREDICTED: Danio rerio cholesterol 7-alpha-monooxygenase-like (LOC559097), mRNA	0	0	0	0	0	0	0.127	0	0	0	0	0	0	0	0	0	0	0	0.3425	0	0	0.404333
gi|125822900|ref|XM_001340127.1| PREDICTED: Danio rerio G-protein coupled receptor 26-like (LOC799848), mRNA	0	0	0	0	0	0	0	0	0	0	0	0	0	0	0	0	0	0	0.181	0	0	0
gi|125823038|ref|XM_688279.2| PREDICTED: Danio rerio GATA binding protein 1b (gata1b), mRNA	0.273	0.332	0.069	0	0	0.125	0.182	0	0	0.339	0.664	0.213	0	0	0	0	0.297	0	0	0.198	0.0725	0.628333
gi|125823117|ref|XM_690840.2| PREDICTED: Danio rerio solute carrier family 6 (neurotransmitter transporter, creatine), member 8 (slc6a8), mRNA	0.668	0.305	0.145	0.0875	0.132	0.211	0	0	0	0.104	0	0	0	0.065	0	0.183	0	0.541	0	0.649	0.1565	1.57267
gi|125823124|ref|XM_001341714.1| PREDICTED: Danio rerio SH3-binding kinase 1-like (LOC100001826), mRNA	0.304	0	0	0	0	0	0	0	0	0.189	0	0	1.224	0.118	0.949	0.333	0	0	0	0	0	0
gi|125823137|ref|XM_683405.2| PREDICTED: Danio rerio si:ch211-195h3.2 (si:ch211-195h3.2), mRNA	0	0	0	0	0	0	0	0	0	0.118	0	2.229	0	0	0	0	0	0	0	0	0	0.103
gi|125823174|ref|XM_682865.2| PREDICTED: Danio rerio nucleus accumbens-associated protein 2-like (LOC559520), mRNA	2.178	0	0.43825	0.568	3.4075	1.37325	0.066	0.233	0.216	0.246	0.241	0.618	0.996	0	0	0	0.108	0	1.0795	0.0325	1.061	0
gi|125823180|ref|XM_001332547.1| PREDICTED: Danio rerio novel protein similar to H.sapiens TMEM77, transmembrane protein 77 (TMEM77) (LOC792944), mRNA	0	0	0	0	0.132	0.18975	0.414	0	0	1.284	0	10.985	19.171	18.135	4.736	17.227	0.45	0	1.1575	0	0.784	0
gi|125823565|ref|XM_001339795.1| PREDICTED: Danio rerio LIM/homeobox protein Lhx8-like (LOC799481), mRNA	0	0.385	0	0	0	0	0	0	0	0	0	0	0	0	0	0	0	0	0	0	0	0
gi|125823731|ref|XM_691100.2| PREDICTED: Danio rerio si:dkey-163f12.7 (si:dkey-163f12.7), mRNA	0	0	0	0	0	0	0	0	0	0	0	0	0	0	0	0	0	0	0.185	0	0	0.139667
gi|125823755|ref|XM_691502.2| PREDICTED: Danio rerio si:dkey-163f12.10 (si:dkey-163f12.10), mRNA	0.633	0	0	0	0	0	0	0	0	0.079	0	0	0	0	0	0	0	0	0.4395	1.0765	0.085	0.385
gi|125823820|ref|XM_690959.2| PREDICTED: Danio rerio si:ch211-163l21.8 (si:ch211-163l21.8), mRNA	0.628	0	0	0	0	0.013	0.03	0	0	0.056	0.273	0.21	0.271	0.07	0	0.982	0	0	0	0	0	0.500667
gi|125824070|ref|XM_001344713.1| PREDICTED: Danio rerio si:dkey-48j7.5 (si:dkey-48j7.5), mRNA	0.525	0.106	0.0455	0	0.2235	0	0	0	0	0	0.213	0	0	0.068	0	0	0	0	0	0.8075	0	0.511
gi|125824074|ref|XM_001344771.1| PREDICTED: Danio rerio si:dkey-183p4.10 (si:dkey-183p4.10), mRNA	0	0	0	0	0	0	0	0	0	0	0	0	0	0	0	0	0	0	0	0	0	0.710667
gi|125824133|ref|XM_001332585.1| PREDICTED: Danio rerio macrophage mannose receptor 1-like protein 1-like, transcript variant 1 (LOC793375), mRNA	0	0	0	0	0	0	0	0	0	0	0	0	0	0	0	0	0	0	0	0	0	0
gi|125824153|ref|XM_690081.2| PREDICTED: Danio rerio macrophage mannose receptor 1-like protein 1-like, transcript variant 4 (LOC566795), mRNA	0	0	0	0	0	0	0	0	0	0	0	0	0	0	0	0	0	0	0	0	0	0
gi|125824171|ref|XM_001334147.1| PREDICTED: Danio rerio macrophage mannose receptor 1-like protein 1-like, transcript variant 1 (LOC794404), mRNA	0	0	0	0	0	0	0	0	0	0	0	0	0	0	0	0	0	0	0	0	0	0
gi|125824313|ref|XM_686793.2| PREDICTED: Danio rerio zinc finger protein 131-like, transcript variant 2 (LOC573287), mRNA	1.457	2.013	0.88325	0.347	1.6085	2.13775	1.236	1.249	0.579	2.218	1.287	1.963	2.132	2.053	0.275	2.32	0.504	2.072	1.658	0.6245	1.082	3.08533
gi|125824638|ref|XM_001337991.1| PREDICTED: Danio rerio si:dkey-31j12.4 (si:dkey-31j12.4), mRNA	0	0	0	0	0	0	0	0	0	0	0	0	0	0	0	0	0	0	0.0425	0	0	0.857667
gi|125824937|ref|XM_691719.2| PREDICTED: Danio rerio serine/threonine-protein kinase ppk6-like (LOC568395), mRNA	0	0	0	0	0	0	0	0	0	0	0	0	0	0	0	0	0	0	0	0	0	0
gi|125824942|ref|XM_691451.2| PREDICTED: Danio rerio speract receptor-like (LOC568137), mRNA	0	0.118	0	0	0	0	0	0	0	0	0	0	0	0	0	0	0	0	0	0	0	0
gi|125825006|ref|XM_678897.2| PREDICTED: Danio rerio guanine nucleotide-binding protein subunit alpha-14-like (LOC556160), mRNA	0	0	0	0	0	0	0	0	0	0	0	0	0	0	0	0	0	0	0	0	0	0.257333
gi|125825096|ref|XM_692614.2| PREDICTED: Danio rerio similar to Rabenosyn-5 (FYVE finger-containing Rab5 effector protein rabenosyn-5) (Zinc finger FYVE domain-containing protein 20) (110 kDa protein) (LOC569240), mRNA	0	0.615	0.1265	0.0755	0.068	0.7065	0.192	0.34	0.237	0.179	0.702	0.676	0.727	0.224	0.15	0	0.157	0.312	0.785	0.666	0.3525	1.16433
gi|125825267|ref|XM_001339552.1| PREDICTED: Danio rerio ovarian cancer G-protein coupled receptor 1-like (LOC799203), mRNA	1.644	0	0.26725	0	0	0	0.11	0	0	0	0	0	0	0	0	0	0	0	0	0	0.1335	0
gi|125825342|ref|XM_001342726.1| PREDICTED: Danio rerio si:dkey-11f4.4 (si:dkey-11f4.4), mRNA	0.83	0	0.10925	0	0.3475	0.04	0.092	0	0	0	0	11.007	9.187	6.861	10.355	13.022	0.301	0	0	0	0	0.758333
gi|125825486|ref|XM_682568.2| PREDICTED: Danio rerio si:dkey-15i8.3 (si:dkey-15i8.3), mRNA	0.429	0	0	0	0	0	0	0	0	0	0	0	0	0.055	0	0	0	0	0.0805	0	0	0.0696667
gi|125825491|ref|XM_678484.2| PREDICTED: Danio rerio pyruvate dehydrogenase kinase, isozyme 1 (pdk1), mRNA	0	0.613	0.40925	0.1055	0.4765	0.099	0.269	1.425	0	0.5	0.49	1.729	0.203	0.234	0	0.441	0	0	0.168	1.1155	0.082	1.769
gi|125825600|ref|XM_688966.2| PREDICTED: Danio rerio thyrotropin-releasing hormone receptor-like (LOC565695), mRNA	0	0	0.11125	0	0.321	0.03625	0.251	0.593	0	0.156	0.458	0	0	0.292	0	0	0	0.407	0.752	0	0.4665	0.186333
gi|125825823|ref|XM_693000.2| PREDICTED: Danio rerio novel protein similar to crystallin, gamma family (LOC569604), mRNA	0	0	0	0	0	0	0	0	0	0	0	0	0	0	0	0	0	0	0	0	0	5.09567
gi|125825978|ref|XM_684987.2| PREDICTED: Danio rerio si:ch211-260b17.6 (si:ch211-260b17.6), mRNA	0	0	0	0	0	0	0	0	0	0	0	0	0	0	0	0	0	0	0	0	0	0
gi|125826140|ref|XM_692784.2| PREDICTED: Danio rerio purinergic receptor P2Y, G-protein coupled 1-like (LOC569401), mRNA	0	0	0	0	0	0	0	0	0	0	0	0	0	0	0	0	0	0	0	0	0	0
gi|125826146|ref|XM_692362.2| PREDICTED: Danio rerio ring finger protein 17 (rnf17), mRNA	0	0.086	0.071	0.111	0	0.03925	0.024	0	0	0.088	0	0.276	0	0	0.588	0	0.038	0	0	0	0.095	8.47533
gi|125826211|ref|XM_679219.2| PREDICTED: Danio rerio splicing factor 3b, subunit 1, transcript variant 1 (sf3b1), mRNA	12.637	11.279	7.9885	6.77	10.876	16.7175	15.213	14.292	8.415	15.04	15.972	8.034	10.216	7.982	16.629	17.829	5.438	12.296	20.4115	7.8975	18.4795	9.51333
gi|125826214|ref|XM_684783.2| PREDICTED: Danio rerio ankyrin repeat domain 44 (ankrd44), mRNA	0.308	0	0	0.054	0.2755	0.06175	0.103	0	0	0	0.062	0	0.723	0.119	0	0	0	0	0	0	0	0.724667
gi|125826311|ref|XM_689767.2| PREDICTED: Danio rerio novel 7 transmembrane receptor (rhodopsin family) domain containing protein-like (LOC566497), mRNA	0.311	0	0.01975	0	0	0	0	0	0	0	0	0	0	0.12	0	0	0	0	0	0	0.0825	0
gi|125826373|ref|XM_678615.2| PREDICTED: Danio rerio si:dkey-3d4.3 (si:dkey-3d4.3), mRNA	0	0	0.1995	0.2545	0.3465	1.1725	0.324	0	0.531	0.452	0.59	0	0	0.282	3.031	0	0	0	0	0	0.3265	0.444333
gi|125826376|ref|XM_679287.2| PREDICTED: Danio rerio sema domain, seven thrombospondin repeats (type 1 and type 1-like), transmembrane domain (TM) and short cytoplasmic domain, (semaphorin) 5B (sema5b), mRNA	0	0	0	0	0.075	0	0	0	0	0	0	0	1.055	0.148	0	1.565	0	0	0	0	0.039	0.00633333
gi|125826513|ref|XM_001341110.1| PREDICTED: Danio rerio si:dkey-10c21.1 (si:dkey-10c21.1), mRNA	0	0	0	0	0	0	0	0	0	0	0.259	0	0	0	0	0	0	0	0.1735	0	0	0.702333
gi|125826628|ref|XM_682971.2| PREDICTED: Danio rerio kelch-like protein 23-like (LOC559613), mRNA	0	0.246	1.4215	0.7915	0.736	0.1165	1.348	0.477	0.331	2.634	2.949	0	0	0.314	0	0	0.11	0.437	0.279	0	4.3335	0
gi|125826792|ref|XM_001335584.1| PREDICTED: Danio rerio matrix-remodeling-associated protein 5-like (LOC795448), mRNA	0	0	0	0	0.224	0	0	0	0	0	0	0	0	0	0	0	0	0	0	0	0	0.0153333
gi|125827033|ref|XM_684338.2| PREDICTED: Danio rerio ankyrin repeat domain-containing protein 34B-like (LOC560938), mRNA	0	0	0	0	0	0	0	0	0	0	0	0	0	0	0	0	0	0	0	0	0	0
gi|125827068|ref|XM_001337411.1| PREDICTED: Danio rerio si:ch211-95j8.2 (si:ch211-95j8.2), mRNA	5.463	0.104	0	0	0	0	0	0	0	0	0	0	0	0.066	0	0	0	0	0	0.0955	0.205	1.34933
gi|125827386|ref|XM_001338121.1| PREDICTED: Danio rerio si:dkey-4c2.7 (si:dkey-4c2.7), mRNA	0	0	0	0	0	0	0	0	0	0	0	0	0	0	0	0	0	0	0	0	0	0.05
gi|125827390|ref|XM_678556.2| PREDICTED: Danio rerio hypothetical protein LOC555896 (LOC555896), mRNA	0	0	0.148	0	0	0	0	0	0	0	0	0	0	0	0	0	0	0	0	0	0	0
gi|125827513|ref|XM_001344828.1| PREDICTED: Danio rerio zinc finger matrin-type protein 4-like (LOC100005974), mRNA	0	0	0	0	0.1365	0	0	0	0	0	0	0.334	0	0	0	0	0	0	0.2905	0	0	0
gi|125827517|ref|XM_688581.2| PREDICTED: Danio rerio 5-hydroxytryptamine receptor 7-like (LOC565304), mRNA	0	0	0	0	0	0	0	0	0	0	0	0	0	0	0	0	0	0	0	0	0	0
gi|125827606|ref|XM_001333183.1| PREDICTED: Danio rerio si:dkey-175g6.2 (si:dkey-175g6.2), mRNA	0	0	0	0	0	0.022	0.051	0	0	0.095	0	0	0	0	0	0	0	0.082	0	0	0	0.18
gi|125827653|ref|XM_679046.2| PREDICTED: Danio rerio solute carrier family 46, member 3 (slc46a3), mRNA	0	0	0	0	0	0	0	0	0	0	0	0	0	0	0	0	0	0	0	0	0	0.119667
gi|125827712|ref|XM_678557.2| PREDICTED: Danio rerio short transient receptor potential channel 4-like (LOC555897), mRNA	0	0	0	0	0	0	0	0	0	0	0	0	0	0	0	0	0	0	0	0	0	0.0106667
gi|125828041|ref|XM_001339696.1| PREDICTED: Danio rerio uncharacterized protein C11orf61 homolog (LOC799368), mRNA	0.464	0.141	0	0	0.109	0	0.077	0.274	0	0.144	0	0	0.234	0.18	0	0	0	0	0	0	0	0.200333
gi|125828126|ref|XM_001343763.1| PREDICTED: Danio rerio reticulon-4 receptor-like 1-like (LOC100004523), mRNA	0	0	0	0	0	0	0	0	0	0	0	0	0	0	0	0	0.124	0.614	0	0	0	0
gi|125828363|ref|XM_001341553.1| PREDICTED: Danio rerio trace amine-associated receptor 6-like (LOC100001633), mRNA	0	0	0	0	0	0	0	0	0	0	0	0	0	0	0	0	0	0	0	0	0	0.0143333
gi|125828377|ref|XM_001342220.1| PREDICTED: Danio rerio trace amine-associated receptor 6-like (LOC100002481), mRNA	0	0	0.02875	0	0	0	0	0	0	0	0	0	0	0	0	0	0	0	0	0	0	0
gi|125828396|ref|XM_001342973.1| PREDICTED: Danio rerio trace amine-associated receptor 6-like (LOC100003441), mRNA	0	0	0	0	0	0	0	0	0	0	0	0	0	0	0	0	0	0	0	0	0	0
gi|125828415|ref|XM_694337.2| PREDICTED: Danio rerio dual specificity protein phosphatase 26-like (LOC570815), mRNA	1.713	0	0	0	0.182	0	0.381	0	0	0	0	0	0	0	0	0	0	0	0	0	0.6865	0.419667
gi|125828509|ref|XM_001332769.1| PREDICTED: Danio rerio uncharacterized protein C5orf35-like (LOC793111), mRNA	0	0	0	0.2015	0.3035	0.467	0.257	0	0	0	0	0	0	1.044	0	0.421	0	0.208	0.6425	0	0	6.54233
gi|125828706|ref|XM_694976.2| PREDICTED: Danio rerio hypothetical protein LOC571393 (LOC571393), mRNA	0.985	0.12	0.20675	0.103	1.4085	0.24875	0.263	1.161	0.215	0.611	3.709	0	0.198	0.534	0	0	0.107	0.85	0.0805	0	0	0.770667
gi|125828872|ref|XM_001333889.1| PREDICTED: Danio rerio calcium/calmodulin-dependent protein kinase type 1-like (LOC794026), mRNA	0	0	0	0	0	0	0	0	0	0	0	0	0	0.107	0	0	0	0	0	0	0	0.26
gi|125829246|ref|XM_001338222.1| PREDICTED: Danio rerio uncharacterized protein C2orf47, mitochondrial-like (LOC797793), mRNA	2.346	4.564	1.46675	0	1.849	3.48175	1.72	2.765	1.537	5.238	0.855	0	0.944	1.273	0	3.081	0.51	1.519	4.234	0.6495	0.746	0.393667
gi|125829334|ref|XM_001336349.1| PREDICTED: Danio rerio vesicle transport protein GOT1A-like (LOC100001834), mRNA	0	0	0	0	0	0	0	0	0	0	0	0	0	0	0	0	0	0	0	0	0	1.95933
gi|125829565|ref|XM_001341002.1| PREDICTED: Danio rerio cas scaffolding protein family member 4-like (LOC100000938), mRNA	0	0	0	0	0	0	0	0	0	0	0	0	0	0	0	0	0	0	0	0	0.096	0.513333
gi|125829573|ref|XM_001341241.1| PREDICTED: Danio rerio fibulin 2 (fbln2), mRNA	1.938	4.419	4.84025	3.0575	2.4025	3.724	8.074	2.513	3.492	10.218	5.416	0.151	2.536	0.939	1.31	2.122	8.11	6.955	21.1745	4.982	14.818	1.83367
gi|125829643|ref|XM_001332681.1| PREDICTED: Danio rerio extracellular calcium-sensing receptor-like (LOC793043), mRNA	0	0	0	0	0	0	0	0	0	0	0	0	0	0	0	0	0	0	0	0	0	0
gi|125829751|ref|XM_689114.2| PREDICTED: Danio rerio uncharacterized protein C3orf21 homolog (LOC565851), mRNA	0.291	0	0	0	0	0.18525	0.097	0	0	0.542	0.531	0	0	0.113	1.212	0	0	0.472	0	0	0	0.623333
gi|125829823|ref|XM_001342634.1| PREDICTED: Danio rerio hypothetical protein LOC100003022 (LOC100003022), mRNA	0	0	0	0	0	0	0	0	0	0	0	0.934	0	0	0	0	0	0	0	0	0	0
gi|125829827|ref|XM_001343012.1| PREDICTED: Danio rerio hypothetical protein LOC100003507 (LOC100003507), mRNA	0	0	0	0	0	0	0	0	0	0	0	0.119	0	0	0	0	0	0	0	0	0	0
gi|125829869|ref|XM_680437.2| PREDICTED: Danio rerio protein bicaudal D homolog 2-like (LOC557383), mRNA	0.771	0.312	0.73875	0.269	0.2025	1.493	0.385	1.666	0.561	0.398	0.156	1.203	0.129	0.647	0	1.125	0.768	1.664	1.212	0	0.223	0.111333
gi|125829872|ref|XM_680598.2| PREDICTED: Danio rerio transketolase-like (LOC557518), mRNA	0.899	0.437	0.19725	0	0.0575	0	0.18	0	0	0.223	0.546	0	0	0	0	0	0.098	0	0.7185	0.628	0.0475	0.854333
gi|125829908|ref|XM_001333715.1| PREDICTED: Danio rerio coiled-coil domain-containing protein 48-like (LOC793893), mRNA	0	0	0.02575	0	0	0.176	0	0	0	0	0	0	0	0	0	0	0	0	0	0.0335	0	0
gi|125829957|ref|XM_001336856.1| PREDICTED: Danio rerio hypothetical protein LOC796535 (LOC796535), mRNA	0	0	0.3095	0	0	0.083	0.768	0.679	1.258	0	0.7	0.898	0.58	1.562	0.599	2.521	1.878	0.932	1.207	0.19	0.234	0.0743333
gi|125830000|ref|XM_001339444.1| PREDICTED: Danio rerio abhydrolase domain containing 6a (abhd6a), mRNA	0	0	0	0	0	0.319	0	0	0	0.413	0	2.854	0	0	0	0	0	0	0	0	0	0.167667
gi|125830075|ref|XM_001342099.1| PREDICTED: Danio rerio claudin-22-like (LOC100002327), mRNA	0	0	0	0	0	0	0	0	0	0	0	0	0	0	0	0	0	0	0	0	0	0
gi|125830150|ref|XM_694211.2| PREDICTED: Danio rerio solute carrier family 1 (glutamate transporter), member 8a (slc1a8a), mRNA	0.533	0.108	0.01125	0	0	0	0	0	0	0	0	0	0	0	0	0	0	0	0.248	0	0.1915	0.941
gi|125830193|ref|XM_001345261.1| PREDICTED: Danio rerio hypothetical protein LOC100006601 (LOC100006601), mRNA	0	0	0	0	0	0	0	0	0	0	0	0	0	0	0	0	0	0	0	0	0	0
gi|125830493|ref|XM_001341786.1| PREDICTED: Danio rerio transmembrane protein 20-like (LOC100001920), mRNA	0	0.168	0.235	0.1445	0.088	0.166	0.551	0	0	0.171	0.168	0	0	0	0	0	0	0	0.0375	0	0.112	0
gi|125830822|ref|XM_690737.2| PREDICTED: Danio rerio interferon-induced protein with tetratricopeptide repeats 5-like (LOC567441), mRNA	0	0	0	0	0.2985	0	0	0	0	0	0	0	0	0	0	0	0	0	0	0	0	0
gi|125830864|ref|XM_694037.2| PREDICTED: Danio rerio AMSH-like protease-like (LOC570542), mRNA	0	0.155	0.044	0.8635	1.883	0.26325	0.764	2.701	0.695	0	0.619	0	0	0.493	0	0	0	0	0	0	0	0.308
gi|125830904|ref|XM_001343883.1| PREDICTED: Danio rerio RING finger protein 151-like (LOC100004674), mRNA	0	0	0	0	0	0	0	0	0	0	0	0	0	0	0	0	0	0	0	0	0	0.018
gi|125830989|ref|XM_681387.2| PREDICTED: Danio rerio probable endonuclease 4-like (LOC558198), mRNA	0.489	0.149	0.14675	0.128	0	0.14725	0	0	0.267	0	0	0	0	0.189	0	1.07	0.266	0	0.308	0.3145	0	0
gi|125831092|ref|XM_001334437.1| PREDICTED: Danio rerio protein phosphatase 1 regulatory subunit 16A-like (LOC794494), mRNA	0.408	0.744	3.701	1.9185	0.513	1.56475	1.428	0.722	1.226	1.646	6.447	0	0	0	0	0.447	0	0	0	0	7.9125	0.377
gi|125831147|ref|XM_677590.2| PREDICTED: Danio rerio polymerase (RNA) II (DNA directed) polypeptide A, transcript variant 1 (polr2a), mRNA	0	0.025	0.006	0	0	0.0855	0.083	0	0.023	0.026	0	0	0	0.016	0	0	0	0.134	0.011	0	0	0.077
gi|125831282|ref|XM_688909.2| PREDICTED: Danio rerio potassium voltage-gated channel, subfamily G, member 3 (kcng3), mRNA	0	0	0	0	0.0855	0	0	0	0	0	0	0	0.538	0	0	0	0	0	0	0	0	0
gi|125831515|ref|XM_689400.2| PREDICTED: Danio rerio melanopsin-A-like (LOC566133), mRNA	0	0.266	0.19225	0.2295	1.6655	1.938	0.438	1.55	0.957	1.359	2.529	0	0	0	0	0.24	1.667	0.591	0.153	0.5705	2.32	0.498667
gi|125831598|ref|XM_001339679.1| PREDICTED: Danio rerio transmembrane protein 100-like (LOC100004911), mRNA	1.259	0	0	0	0	0	0.21	0	0	0	0	0	0	0	0	0	0	0	0	0	0	0
gi|125831746|ref|XM_001338509.1| PREDICTED: Danio rerio hypothetical protein LOC798089 (LOC798089), mRNA	1.065	0	0.064	0.1115	0	0.21475	0	0	0	0	0	0	0	0	0	0	0	0	1.459	0	0	0
gi|125831852|ref|XM_696077.2| PREDICTED: Danio rerio tektin 3 (tekt3), mRNA	0	0	0	0	0	0	0.071	0	0	0	0	0	0	0	0	0	0	0	0	0.239	0	0.503
gi|125832021|ref|XM_001340649.1| PREDICTED: Danio rerio clarin-3-like (LOC100000502), mRNA	0	0	0	0	0	0	0	0	0	0	0	0	0	0	0	0	0	0	0	0	0	1.94833
gi|125832275|ref|XM_693051.2| PREDICTED: Danio rerio transmembrane protein 205-like (LOC569653), mRNA	0	0.278	0	0	0	0	0	0	0	0	0	0	0	0	0	0	0	0	0	0.3305	0	0
gi|125832340|ref|XM_679637.2| PREDICTED: Danio rerio protein bicaudal D homolog 1-like (LOC556758), mRNA	0	0.141	0	0	0.382	0.11075	0.27	0.136	0	0	0	0	0.116	0.045	0.722	0.38	0	0	0.063	0	0.1085	0.072
gi|125832419|ref|XM_679802.2| PREDICTED: Danio rerio cannabinoid receptor interacting protein 1, transcript variant 2 (cnrip1), mRNA	0	0.599	0	0.258	0	0	0.329	0	0	0.612	0	0	0	0.191	0	0	0.804	1.33	0	0	0	0.426
gi|125833069|ref|XM_001335276.1| PREDICTED: Danio rerio si:ch211-194c3.6 (si:ch211-194c3.6), mRNA	0	0	0	0	0	0	0	0	0	0	0	0	0	0	0	0	0	0	0	0	0	0
gi|125833203|ref|XM_001341945.1| PREDICTED: Danio rerio si:ch211-1n9.11 (si:ch211-1n9.11), mRNA	0.3	0	0	0	0	0	0	0	0	0	0	0	0	0	0	0	0	0	0	0	0	0
gi|125833226|ref|XM_684924.2| PREDICTED: Danio rerio si:ch211-120p12.3 (si:ch211-120p12.3), mRNA	0.536	0.391	0.21	0	0.2715	0.92625	0.322	0.126	0.176	0.865	0.195	0.92	0.108	0.125	0	0.939	0.058	0.232	2.2175	0.6785	1.652	0.177
gi|125833265|ref|XM_001344224.1| PREDICTED: Danio rerio calcium homeostasis modulator protein 3-like (LOC100005130), mRNA	0	0	0	0	0	0	0	0	0	0	0	0	0	0	0	0	0	0	0	0	0	0
gi|125833267|ref|XM_001344258.1| PREDICTED: Danio rerio si:dkey-51a16.6 (si:dkey-51a16.6), mRNA	0	0	0	0	0	0	0	0	0	0	0	0	0	0	0	0	0	0	0	0	0	0
gi|125833336|ref|XM_682449.2| PREDICTED: Danio rerio poly(ADP-ribose) glycohydrolase-like (LOC559134), mRNA	1.537	0.993	0.81025	1.303	0.804	0.90425	1.217	1.019	0.892	1.013	1.751	0	0.967	0.893	0.899	1.262	0.313	0	0.1065	0.8485	0.6435	8.183
gi|125833378|ref|XM_685710.2| PREDICTED: Danio rerio si:dkey-112k13.2 (si:dkey-112k13.2), mRNA	0	3.298	0.6605	2.658	0.455	0.544	9.358	4.513	2.613	5.344	12.405	0	0.642	0.247	0	1.048	3.121	6.887	1.288	1.2095	4.783	0
gi|125833415|ref|XM_001337735.1| PREDICTED: Danio rerio si:dkey-174e3.3 (si:dkey-174e3.3), mRNA	0.331	0	0.021	0.6885	2.559	0.66725	0.275	3.312	0.451	0.513	2.008	0.258	1.83	0.897	0.344	0	0.18	0.178	0.574	0	0.2455	0.00366667
gi|125833480|ref|XM_690171.2| PREDICTED: Danio rerio similar to Glycine N-acyltransferase-like protein (Acyl-CoA:glycine N-acyltransferase-like) (AAc-like) (LOC566887), mRNA	0	0.192	0.1095	0.165	0	0.26225	0	0	0	0	0	0	0	0	0.656	0	0	0	0.306	0	0.2565	0
gi|125833620|ref|XM_684036.2| PREDICTED: Danio rerio similar to Mitogen-activated protein kinase kinase kinase 9 (LOC560639), mRNA	0	0	0	0	0.0525	0.01625	0.037	0	0	0	0	0	0.225	0.043	0	0	0	0	0.1105	0	0.1365	0.071
gi|125833683|ref|XM_001336384.1| PREDICTED: Danio rerio cat eye syndrome critical region protein 6 homolog (LOC796113), mRNA	1.726	0	0	0	0	0	0	0	0	0	0	0	0	0	0	0	0	0	0	0	0	0
gi|125833711|ref|XM_685953.2| PREDICTED: Danio rerio heparanase 2 (hpse2), mRNA	0	0	0.05875	0	0	0	0	0	0	0	0	0	0	0	0	0	0	0.317	0	0	0	0.611667
gi|125833734|ref|XM_001340590.1| PREDICTED: Danio rerio GTPase IMAP family member 4-like (LOC100000417), mRNA	0	0	0	0	0	0	0	0	0	0	0	0	0	0	0	0	0	0	0	0	0	0
gi|125833740|ref|XM_689329.2| PREDICTED: Danio rerio GTPase IMAP family member 8-like (LOC566064), mRNA	0	0	0	0	0	0	0	0	0	0	0	0	0	0	0	0	0	0	0	0	0	0
gi|125833909|ref|XM_001335368.1| PREDICTED: Danio rerio novel protein similar to rodent fibronectin type III domain containing 5 (Fndc5) (LOC795265), mRNA	0	0	0	0	0	0	0	0	0	0	0	0	0	0	0	0	0	0	0	0	0	0.148333
gi|125834144|ref|XM_685557.2| PREDICTED: Danio rerio neurotrypsin-like (LOC562156), mRNA	0.136	0.495	2.049	0.318	0.9045	0.08175	1.086	0.8	0.889	3.452	4.947	1.271	4.234	1.315	0	0.297	0.885	3.442	0.8245	1.302	21.1105	0.0873333
gi|125834395|ref|XM_682219.2| PREDICTED: Danio rerio UDP-GlcNAc:betaGal beta-1,3-N-acetylglucosaminyltransferase 2-like (LOC558930), mRNA	0	0	0	0	0	0	0	0	0	0	0	0	0	0	0	0	0	0	0	0	0	0
gi|125834501|ref|XM_001334677.1| PREDICTED: Danio rerio lysophosphatidic acid receptor 4-like (LOC794698), mRNA	0	2.343	0.30675	0.3365	0	0.3325	1.177	1.136	0	2.789	1.561	0	0	0.249	0.334	0	0.175	2.426	0	0	2.1915	0
gi|125834523|ref|XM_001336386.1| PREDICTED: Danio rerio uncharacterized protein KIAA2022-like (LOC796115), mRNA	0	0	0.05225	0	0.0295	0.0265	0.061	0	0.05	0.171	0.056	0	0	0	0	0.101	0	0	0.0125	0	0.32	0
gi|125834694|ref|XM_001345030.1| PREDICTED: Danio rerio centrin-1-like (LOC100006257), mRNA	0	0	0	0	0	0	0	0	0	0	0	0	0	0	0	0	0	0.342	0	0	0	0.343667
gi|125834902|ref|XM_001332165.1| PREDICTED: Danio rerio D(1) dopamine receptor-like (LOC792634), mRNA	0	0	0	0	0	0	0	0	0	0	0	0	0	0	0	0	0	0	0	0	0	0
gi|125834908|ref|XM_701364.2| PREDICTED: Danio rerio hypothetical protein LOC568704 (LOC568704), mRNA	0	0	0	0	0	0	0	0	0	0	0	0	0	0.084	0	0	0	0	0	0	0	0.337333
gi|125834984|ref|XM_001337418.1| PREDICTED: Danio rerio si:dkeyp-110e4.11 (si:dkeyp-110e4.11), mRNA	0	0	0	0	0	0	0	0	0	0	0	0	0	0	0	0	0	0	0	0	0	0
gi|125835065|ref|XM_688989.2| PREDICTED: Danio rerio melatonin receptor type 1A-A-like (LOC565718), mRNA	0	0	0	0	0	0	0	0	0	0.199	0.584	0	0	0	0	0	0	0	0	0	0.1305	0
gi|125835069|ref|XM_688860.2| PREDICTED: Danio rerio FAT tumor suppressor homolog 1 (Drosophila) (fat1), mRNA	0	0	0	0	0	0	0	0	0	0	0.015	0	0	0	0	0.111	0	0	0.1185	0	0.071	0.001
gi|125835407|ref|XM_679676.2| PREDICTED: Danio rerio butyrophilin-like protein 8-like (LOC556776), mRNA	0	0	0	0	0	0	0	0	0	0	0	0	0	0	0.266	0	0	0	0	0	0	0
gi|125836466|ref|XM_683311.2| PREDICTED: Danio rerio short transient receptor potential channel 2-like (LOC559914), mRNA	0	0	0	0	0	0	0	0	0	0	0	0	0	0	0	0	0.431	0	0	0	0.159	0
gi|125836506|ref|XM_681750.2| PREDICTED: Danio rerio melanin-concentrating hormone receptor 2-like (LOC558520), mRNA	0	0.792	0.077	0.341	5.864	4.474	0.652	3.073	0.712	0.808	1.188	0.763	0	0	0	0	0.354	0	0	0	0.1725	0
gi|125836660|ref|XM_001333365.1| PREDICTED: Danio rerio hypothetical protein LOC793599 (LOC793599), mRNA	0	0	0	0	0.0455	0	0	0	0	0	0	0	0	0	0	0	0	0	0	0	0	0
gi|125836782|ref|XM_689602.2| PREDICTED: Danio rerio protein FAM55C-like (LOC566330), mRNA	0	0	0	0	0	0	0	0	0	0	0	0	0	0	0	0	0	0	0	0	0	0.339667
gi|125836978|ref|XM_001345519.1| PREDICTED: Danio rerio tripartite motif-containing protein 59-like (LOC100006971), mRNA	0	0.199	0	0	0	0.10275	0.437	0	0	0.407	0.199	0	0.33	0.254	0	0.359	0.178	0	1.285	0	0.087	0.0256667
gi|125837032|ref|XM_684467.2| PREDICTED: Danio rerio similar to MxG protein (LOC561067), mRNA	0	0	0	0	0	0	0	0	0	0.317	0	0.133	0	0	0	0	0	0	0	0	0	0.101333
gi|125837075|ref|XM_001335976.1| PREDICTED: Danio rerio RING finger protein 169-like (LOC795748), mRNA	0	0	0	0	0	0.219	0.076	0	0.249	0	0.139	0	0	0	0	0	0	0	0.3855	0	0.432	0.005
gi|125837098|ref|XM_001337738.1| PREDICTED: Danio rerio beta-1,3-galactosyl-O-glycosyl-glycoprotein beta-1,6-N-acetylglucosaminyltransferase 4-like (LOC797302), mRNA	0	0	0	0	0	0	0	0	0	0	0	0.209	0	0.104	0	0.294	2.481	0	0	0	0	0
gi|125837161|ref|XM_693182.2| PREDICTED: Danio rerio zinc finger and BTB domain-containing protein 16-A-like (LOC569773), mRNA	0	0	0	0	0	0	0	0	0	0.101	0	0	0	0	0	0	0.088	0.264	0	0	0	0
gi|125837178|ref|XM_691940.2| PREDICTED: Danio rerio wu:fb09h07 (wu:fb09h07), mRNA	0	0	0	0	0	0	0	0	0	0	0	0	1.532	0.236	0.633	0	0.496	0	0.083	0.271	0	1.292
gi|125837186|ref|XM_001341842.1| PREDICTED: Danio rerio ADAM metallopeptidase with thrombospondin type 1 motif, 15 (adamts15), mRNA	0	0	0.20425	0	0.231	0	0.528	0.144	0	0.378	0	0	0.245	0	0	0	0.066	0	0.5605	0	0.1315	0.716667
gi|125837188|ref|XM_001341899.1| PREDICTED: Danio rerio A disintegrin and metalloproteinase with thrombospondin motifs 15-like (LOC100002059), mRNA	0	0.074	0.4655	0.127	0.727	0.2035	0.645	0.428	0	0.751	1.25	0	0	0	0	0.265	0.132	0.914	4.0015	0	0.6335	0.269667
gi|125837261|ref|XM_685807.2| PREDICTED: Danio rerio calcium-binding protein 8-like (LOC562420), mRNA	0	0	0	0	0	0	0	0	0	0	0	0	0	0	0	0	0	0	0	0	0	0
gi|125837298|ref|XM_001335557.1| PREDICTED: Danio rerio v-rel reticuloendotheliosis viral oncogene homolog B (relb), mRNA	2.473	19.941	3.87725	1.981	3.0155	3.5865	12.194	7.188	4.499	4.396	16.92	0.129	0.498	1.086	0.857	0.722	2.687	9.427	9.693	1.7975	9.504	2.618
gi|125837345|ref|XM_001337576.1| PREDICTED: Danio rerio hypothetical protein LOC797154 (LOC797154), mRNA	0	0	0	0	0	0	0	0	0	0	0	0	0	0	0	0	0	0	0	0	0	0.053
gi|125837365|ref|XM_692454.2| PREDICTED: Danio rerio ephexin-1-like (LOC569090), mRNA	1.086	2.64	1.2705	0.1625	0.8815	0.32775	0.93	1.828	0.339	0.962	1.602	0	1.561	0	0	0.17	0.674	2.762	2.2065	0.23	3.449	3.20967
gi|125837487|ref|XM_001343600.1| PREDICTED: Danio rerio chimerin (chimaerin) 1-like (LOC100004299), mRNA	0	0.045	0.22575	0.077	0.163	0.29175	0.123	0	0.201	0.137	0	0	0.37	0.228	0	0.161	0.04	0	0.664	0.25	0.108	1.53533
gi|125837516|ref|XM_679576.2| PREDICTED: Danio rerio Mab-21 domain containing 2 (mb21d2), mRNA	0	0	0.043	0	0.144	0.071	0.075	0	0.123	0.281	0.275	0	0	0	0	0	0.123	0	0	0.164	0.152	1.413
gi|125837711|ref|XM_685721.2| PREDICTED: Danio rerio transmembrane protein 136-like (LOC562331), mRNA	0	1.432	0.38725	0	0	0	0	0	0	0	0	0	0	0	0	1.031	0	0	0.192	0	0.125	0
gi|125837813|ref|XM_001334168.1| PREDICTED: Danio rerio zinc finger protein 813-like (LOC794268), mRNA	0	0	0	0.095	0.2855	0	0	0	0	0	0.33	0	0	0	0	0	0	0	0	0	0	0.775333
gi|125837963|ref|XM_686301.2| PREDICTED: Danio rerio leucine-rich repeat-containing protein C17orf76-like (LOC562936), mRNA	0	0	0.01625	0	0	0	0	0	0	0	0	0	0	0	0	0	0	0	0.4565	0	0.6825	0.687667
gi|125838011|ref|XM_690112.2| PREDICTED: Danio rerio similar to Unc119b (LOC566824), mRNA	0	0	0.08025	0.1565	0	0.043	0.1	0	0	0.37	0	0	0.3	0.926	0	1.307	0	0.483	1.8715	0.049	0.2005	1.125
gi|125838184|ref|XM_001336701.1| PREDICTED: Danio rerio RIP140-A (LOC796407), mRNA	0.105	0.191	0.0065	0	0.1315	0.03275	0.07	0.74	0	0.324	0.508	0.408	0.421	0.284	0.544	0.343	0.057	0	0.201	0	0.07	2.62
gi|125838363|ref|XM_001335893.1| PREDICTED: Danio rerio c3a anaphylatoxin chemotactic receptor-like (LOC795679), mRNA	0	0	0	0	0	0	0	0	0	0	0	0	0	0	0	0	0	0	0	0	0	0
gi|125838404|ref|XM_001338312.1| PREDICTED: Danio rerio hypothetical protein LOC797886 (LOC797886), mRNA	0	0	0	0	0	0	0	0	0	0	0	0	0	0	0	0	0	0	0	0	0	0
gi|125838406|ref|XM_682606.2| PREDICTED: Danio rerio eph receptor A4, like (epha4l), mRNA	0.112	0	0	0	0	0	0.075	0	0	0	0	0	0	0	0	0	0	0	0	0	0	0.191667
gi|125838417|ref|XM_001338867.1| PREDICTED: Danio rerio finTRIM family, member 73 (ftr73), mRNA	0	0	0	0	0	0	0	0	0	0	0.124	0	0.616	0.079	0	0	0	0	0	0	0.083	0.486
gi|125838536|ref|XM_001342842.1| PREDICTED: Danio rerio kelch repeat and BTB (POZ) domain containing 3 (kbtbd3), mRNA	0.379	0.115	0	0	0	0	0	0	0	0	0	0	0	0	0	0	0.103	0	0	0	0	0.132333
gi|125838576|ref|XM_686813.2| PREDICTED: Danio rerio im:6903943 (im:6903943), mRNA	89.1	0.303	0.1905	0	0	0.018	0.415	0	0	0	0	0	0	0	0	0	0	0	0.4855	1.636	0	1.57533
gi|125838783|ref|XM_698720.2| PREDICTED: Danio rerio hypothetical protein LOC556653 (LOC556653), mRNA	0	0	0	0	0	0	0	0	0	0	0	0	0	0	0	0	0	0	0	0	0	0.205667
gi|125838917|ref|XM_682578.2| PREDICTED: Danio rerio uncharacterized protein C3orf23-like (LOC559258), mRNA	0	0.444	0.15275	0.0955	0.404	0.0745	0.122	0.43	0	0.453	0.111	0	0.184	0	0	0.2	0.099	1.477	0.404	0	0.197	0.172667
gi|125838927|ref|XM_001343843.1| PREDICTED: Danio rerio c-C chemokine receptor type 2-like (LOC100004625), mRNA	0	0	0	0	0	0	0	0	0	0	0	0	0	0	0	0	0	0.726	0	0	0	0
gi|125838940|ref|XM_001344115.1| PREDICTED: Danio rerio c-C chemokine receptor type 2-like (LOC100004988), mRNA	0	0	0	0	0	0	0	0	0	0	0	0	0	0	0	0.349	0	0	0	0	0	0
gi|125839316|ref|XM_001335281.1| PREDICTED: Danio rerio urotensin-2 receptor-like (LOC795198), mRNA	0	0	0	0	0	0	0	0	0	0	0	0	0	0	0	0	0	0	0	0	0	0
gi|125839462|ref|XM_001344074.1| PREDICTED: Danio rerio hypothetical protein LOC100004932 (LOC100004932), mRNA	0	0	0	0	0	0	0	0	0	0	0	0.646	0	0.321	1.033	0.181	0	0	0	0	0	0
gi|125839501|ref|XM_684195.2| PREDICTED: Danio rerio GTPase IMAP family member 8-like (LOC560795), mRNA	0	0	0	0	0	0	0	0	0	0	0	0	0	0	0	0	0	0	0	0	0	0.141667
gi|125839719|ref|XM_001339187.1| PREDICTED: Danio rerio b-cell antigen receptor complex-associated protein alpha chain-like (LOC798792), mRNA	6.942	7.315	2.53325	1.085	0	0.30625	3.393	1.091	3.032	2.583	1.124	5.054	10.71	19.546	31.271	24.313	3.269	0.999	3.458	0.564	7.5925	0.0406667
gi|125839873|ref|XM_001344786.1| PREDICTED: Danio rerio apolipoprotein A-IV-like (LOC100005908), mRNA	0	0	0	0	0	0	0	0	0	0	0	0	0	0	0	0	0	0	0	0	0	0
gi|125839931|ref|XM_686634.2| PREDICTED: Danio rerio protein slowmo homolog 1-like (LOC563270), mRNA	0	0	0	0	0	0	0	0	0	0	0	0	0	0	0	0	0	0	0	0	0	0.497667
gi|125839932|ref|XM_689914.2| PREDICTED: Danio rerio WD repeat domain 67 (wdr67), mRNA	0.802	0.183	0.081	0.0525	0.442	0.041	0.2	0.236	0.109	0	0.243	0.235	0	0	0	0.219	0.054	0.324	2.9155	0.2115	0.202	4.34333
gi|125839962|ref|XM_689102.2| PREDICTED: Danio rerio ataxin 1b (atxn1b), mRNA	0.683	0.249	0	0	0.064	0.07525	0.182	0.161	0	0.085	0.332	0	0	0	0	0	0	0	0.4185	0.873	0.256	0.339667
gi|125840163|ref|XM_001341568.1| PREDICTED: Danio rerio calbindin 1 (calb1), mRNA	0	0	0.12975	0	0	0	0.238	0	0	0.222	0.434	0	0.36	0	0	0	0	0	0	0	0	0.0553333
gi|125840207|ref|XM_685430.2| PREDICTED: Danio rerio protein QN1 homolog (LOC562035), mRNA	1.546	3.008	1.453	0.906	0.8675	0.91425	1.211	0.82	0.844	1.055	0.798	0.663	0.467	0.479	0	0.677	0.588	2.085	1.6505	1.562	2.1015	1.87667
gi|125841194|ref|XM_001336061.1| PREDICTED: Danio rerio uronyl 2-sulfotransferase-like (LOC795827), mRNA	0	0	0.01925	0	0.1945	0	0	0	0	0	0	0	0	0	0	0	0	0	0	0	0	0
gi|125841196|ref|XM_689718.2| PREDICTED: Danio rerio SAM and SH3 domain-containing protein 1-like (LOC566448), mRNA	1.549	0.404	0.598	0.9825	2.998	1.7695	0.922	6.39	0.785	1.99	0.739	1.122	0	0.386	1.84	0.121	0.301	1.194	0.4165	0	0	0.0563333
gi|125841207|ref|XM_001336474.1| PREDICTED: Danio rerio gap junction epsilon-1 protein-like (LOC796202), mRNA	0	0	0	0	0	0	0	0	0	0	0	0	0	0	0	0	0	0	0	0	0	0
gi|125841230|ref|XM_001334413.1| PREDICTED: Danio rerio putative uncharacterized protein C6orf183-like (LOC797058), mRNA	0	0	0	0	0	0	0	0	0	0	0	0	0	0	0	0	0	0	0	0	0	0
gi|125841348|ref|XM_683858.2| PREDICTED: Danio rerio kelch-like protein 10-like (LOC560458), mRNA	0	0	0	0	0	0	0	0	0	0	0	0	0	0	0	0	0	0	0	0.1355	0	0.537667
gi|125841470|ref|XM_680971.2| PREDICTED: Danio rerio uncharacterized protein C14orf38-like (LOC557827), mRNA	0	0	0	0	0	0	0	0	0	0	0	0	0	0.136	0	0	0	0	0	0	0	0.124333
gi|125841791|ref|XM_688246.2| PREDICTED: Danio rerio G-protein coupled receptor 26-like (LOC564928), mRNA	0	0	0	0	0	0	0	0	0	0	0.196	0	0	0	0	0	0	0	0	0	0	0
gi|125841809|ref|XM_001340539.1| PREDICTED: Danio rerio tau tubulin kinase 1 (ttbk1), mRNA	0.166	0	0.04925	0	0	0	0	0	0	0.052	0	0	0	0	0	0	0.045	0.314	0.0355	0	0.034	0.269
gi|125841946|ref|XM_687572.2| PREDICTED: Danio rerio si:ch211-170h3.5 (si:ch211-170h3.5), mRNA	0	0	0	0	0	0	0.07	0	0	0	0	0	0	0	0	0	1.034	2.738	0	0	0.056	0.00466667
gi|125841971|ref|XM_694203.2| PREDICTED: Danio rerio membrane bound O-acyltransferase domain containing 2a (mboat2a), mRNA	0.224	0.409	0.27825	0.235	1.099	0.1885	0.15	1.587	0	1.113	2.317	1.925	2.257	1.217	0.233	1.719	0	0	1.0585	0	1.051	0.241
gi|125842018|ref|XM_001339456.1| PREDICTED: Danio rerio transmembrane protein 121-like (LOC799098), mRNA	0	0	0	0	0	0	0	0	0	0	0	0	0	0	0	0	0	0	0	0	0	0.055
gi|125842041|ref|XM_683094.2| PREDICTED: Danio rerio potassium channel subfamily K member 2-like (LOC559728), mRNA	0	0	0	0	0	0	0	0	0	0.286	0	0	0	0	0.239	0	0.125	0	0	0	0	0
gi|125842063|ref|XM_001342058.1| PREDICTED: Danio rerio protein FAM196A-like (LOC100002268), mRNA	0.508	0.154	0.65225	0	1.4065	0.0365	2.032	0.299	0.139	1.418	2.624	0	0	0.689	1.321	0.278	0	0.137	1.415	0	0.714	0
gi|125842180|ref|XM_001335980.1| PREDICTED: Danio rerio Rho GTPase activating protein 5 (arhgap5), mRNA	2.883	4.787	0.70975	0.405	1.2715	0.58975	2.217	10.391	0.394	2.957	8.352	0.519	5.021	6.402	19.886	6.554	3.856	7.239	3.717	1.449	2.6815	1.655
gi|125842203|ref|XM_689471.2| PREDICTED: Danio rerio growth/differentiation factor 7 (gdf7), mRNA	1.069	0	0	0	0	0	0	0	0	0	0	0	0.269	0	0	0	0	0	0	0	0	0
gi|125842312|ref|XM_001342336.1| PREDICTED: Danio rerio platelet-activating factor receptor-like (LOC100002627), mRNA	0	0	0	0	0	0	0	0	0	0	0	0	0	0	0	0	0	0	0	0	0	0
gi|125842434|ref|XM_700969.2| PREDICTED: Danio rerio hypothetical protein LOC561960 (LOC561960), mRNA	6.669	0	0.188	0	0	0.182	0.097	0	0	0	0	0	0	0	3.617	0	0	0	0	0.6305	0.195	0.393667
gi|125842451|ref|XM_001338239.1| PREDICTED: Danio rerio leucine-rich repeat and fibronectin type-III domain-containing protein 2-like (LOC797812), mRNA	2.027	0.352	0.3235	0	0.2065	0.21875	0.724	0	0.079	0.09	0.44	0	0	0	0	0	0.079	0	1.394	4.933	0.3865	0.0943333
gi|125842479|ref|XM_001339655.1| PREDICTED: Danio rerio protein ZNF365-like (LOC799320), mRNA	0	0.397	0.1805	1.19	2.2685	0.22725	0	0	0	0	0	0	0	0	0	0	0.178	0.529	0	0	0	0
gi|125842487|ref|XM_001339769.1| PREDICTED: Danio rerio cytosolic 5'-nucleotidase 1A-like (LOC799449), mRNA	0	0	0.02	0	0	0	0	0	0.173	0.394	0.193	0	0	0	0	0	0	0	0	0	0	0
gi|125842505|ref|XM_001340472.1| PREDICTED: Danio rerio autophagy-related protein 2 homolog B-like (LOC100000277), partial mRNA	0	0.42	0	0	0	0	0	0	0	0	0	0	0	0	0	0	0	0	0.3355	0	0	0
gi|125842524|ref|XM_001340956.1| PREDICTED: Danio rerio putative palmitoyltransferase ZDHHC22-like (LOC100000886), mRNA	0	0	0.12275	0	0	0	0	0	0	0	0	0	0	0	0	0	0	0	0	0	0	0
gi|125842679|ref|XM_693718.2| PREDICTED: Danio rerio jun dimerization protein 2-like (LOC570258), mRNA	0	0	0	0	0	0	0.698	0	0	0	0.424	0	0	0	0	0	0	0	0.1895	0	0	0.0543333
gi|125842764|ref|XM_692942.2| PREDICTED: Danio rerio protein angel homolog 1-like (LOC569547), mRNA	1.643	0.726	0.162	1.4415	3.5875	4.4965	0.448	5.634	1.549	2.594	3.448	3.029	0.451	1.678	0	0.981	0.081	0.645	1.818	0	0.3435	1.71667
gi|125842816|ref|XM_683701.2| PREDICTED: Danio rerio sushi domain-containing protein 4-like (LOC560304), mRNA	0.146	0.355	0	0.153	0.115	0.06325	0.244	0	0.718	0.272	0.089	0.228	0.147	0.113	0	0.32	0.159	0.315	0.5305	0.024	0.509	0.256667
gi|125842832|ref|XM_683781.2| PREDICTED: Danio rerio HHIP-like protein 2-like (LOC560376), mRNA	0	0.084	0.18275	0	0.044	0.02	0.277	0	0	0.43	0.506	0	0	0	0	0	0.905	2.695	0.323	0.306	0.0565	0
gi|125843100|ref|XM_001334261.1| PREDICTED: Danio rerio hypothetical LOC794350 (LOC794350), mRNA	0	0	0	0	0	0	0	0	0	0	0	0	0	0	0	0	0	0	0	0	0	0.0166667
gi|125843172|ref|XM_677831.2| PREDICTED: Danio rerio tetraspanin 9 (tspan9), mRNA	0.312	0.19	0.0395	0.568	0	0.045	0.312	0	0.17	0.774	0.379	0	1.256	1.935	0.649	2.733	0	0.168	0.0425	0	0.127	0
gi|125843300|ref|XM_688593.2| PREDICTED: Danio rerio si:ch211-154h20.4 (si:ch211-154h20.4), mRNA	0.539	0.246	0.032	0.353	2.3165	0.9495	0.943	4.13	0.294	0.752	1.392	0	0.136	0.052	0.981	0	0.146	1.454	0.727	0	0.0905	0.0206667
gi|125843389|ref|XM_677926.2| PREDICTED: Danio rerio si:ch211-242e8.1 (si:ch211-242e8.1), mRNA	0	0	0.04325	0	0	0	0.076	0	0	0.142	0.139	0	1.379	1.062	2.375	0.5	0	0.739	0.124	0	0.3675	0.174667
gi|125843418|ref|XM_688109.2| PREDICTED: Danio rerio si:dkey-287h13.1 (si:dkey-287h13.1), mRNA	0	0	0	0	0	0	0	0	0	0	0	0	0	0	0	0	0	0	0.764	0	0	0
gi|125843428|ref|XM_001342231.1| PREDICTED: Danio rerio relaxin/insulin-like family peptide receptor 3-like (LOC100002494), mRNA	0	0	0	0	0	0	0	0	0	0.202	0	0.507	0	0	0	0	0	0	0	0	0	0
gi|125843462|ref|XM_001343605.1| PREDICTED: Danio rerio hypothetical protein LOC100004307 (LOC100004307), mRNA	0	0	0	0	0	0	0	0	0	0	0	0	0	0	0	0	0	0	0	0	0	0
gi|125843698|ref|XM_001334531.1| PREDICTED: Danio rerio extracellular calcium-sensing receptor-like (LOC794572), mRNA	0	0	0	0.07	0	0	0	0	0	0	0	0	0	0	0	0	0	0	0	0	0	0
gi|125843791|ref|XM_684403.2| PREDICTED: Danio rerio si:dkey-149j18.1 (si:dkey-149j18.1), mRNA	2.481	1.547	0.6505	0.1665	2.442	1.73775	0.806	0.6	0.799	2.367	1.314	2.183	0.832	1.873	1.918	0.627	0.38	0.755	1.8235	0.7465	3.3535	0.372667
gi|125844014|ref|XM_001340960.1| PREDICTED: Danio rerio hypothetical protein LOC100000890 (LOC100000890), mRNA	0.516	0	0	0	0	0.20275	0	0	0.094	0	0	0	0	0	0	0	2.804	0	0	0	0	0.0936667
gi|125844046|ref|XM_001341953.1| PREDICTED: Danio rerio zinc transporter 10-like (LOC100002134), mRNA	2.931	10.393	1.846	0.5115	0.967	2.14525	46.469	6.62	2.933	33.776	5.489	0	0	0.568	0	1.604	2.787	32.546	20.9025	2.028	3.212	0.143
gi|125844089|ref|XM_691901.2| PREDICTED: Danio rerio neuronal acetylcholine receptor subunit beta-4-like (LOC568566), mRNA	0	0	0	0	0	0	0	0	0	0	0	0	0	0	0	0	0	0	0	0	0	0.17
gi|125844288|ref|XM_001343108.1| PREDICTED: Danio rerio melanin-concentrating hormone receptor 1a (mchr1a), mRNA	0	0	0	0	0	0	0	0	0	0	0	0	0	0	0	0	0	0	0	0	0	0
gi|125844681|ref|XM_001333199.1| PREDICTED: Danio rerio c3a anaphylatoxin chemotactic receptor-like (LOC793473), mRNA	0	0	0	0	0	0	0	0	0	0	0	0	0	0	0	0	0	0	0	0	0	0
gi|125844772|ref|XM_687196.2| PREDICTED: Danio rerio interferon-inducible GTPase 5-like (LOC563833), mRNA	0	0	0	0	0	0	0	0	0	0	0	0	0	0	0	0	0	0	0	0	0	0
gi|125844779|ref|XM_001338801.1| PREDICTED: Danio rerio si:ch211-185o22.2 (si:ch211-185o22.2), mRNA	0	0	0.1615	1.095	0	0	0	0.709	0	0	0	0	0.605	0	0	0	0	1.947	0	0	0	0.542
gi|125844888|ref|XM_678198.2| PREDICTED: Danio rerio riboflavin transporter 2-like (LOC555631), mRNA	0	0.464	0.18075	2.127	15.8365	6.65825	0.255	10.806	1.668	1.737	6.806	0	0	0	0	0	0	0	0	0	0	0.273
gi|125844980|ref|XM_001345896.1| PREDICTED: Danio rerio hypothetical protein LOC100007493 (LOC100007493), mRNA	0	0	0	0	0	0.03075	0.071	0	0	0	0.13	0	0	0	0	0	0	0	0	0.035	0	3.79167
gi|125845055|ref|XM_681914.2| PREDICTED: Danio rerio si:ch211-225n7.1 (si:ch211-225n7.1), mRNA	0	0	0.06525	0	0.2275	0.239	0	0	0.397	0	0.295	0	0	0	0	0	0	0.131	0.471	0	0.0985	0
gi|125845146|ref|XM_001338242.1| PREDICTED: Danio rerio nuclear receptor subfamily 0, group B, member 2b (nr0b2b), mRNA	0	0	0.02875	0	0	0	0	0	0	0	0.831	0	0	0	0	0	0	0	0	0	0.1855	0
gi|125845389|ref|XM_694134.2| PREDICTED: Danio rerio protein argonaute-2-like (LOC570630), mRNA	0.49	0	0.1435	0.064	0	0.12375	0.286	0.144	0.134	0.532	0.074	0	0.37	0	0	0.268	0	0.066	0.0525	1.4665	0	1.05233
gi|125845428|ref|XM_001341251.1| PREDICTED: Danio rerio solute carrier family 22 member 13-like (LOC100001249), mRNA	0	0.639	0.05325	0	0.8635	0.091	0.49	2.229	0.115	3.78	1.787	0.164	0.634	0.244	0	0.23	0	0.113	0	0	0	0
gi|125845747|ref|XM_001342536.1| PREDICTED: Danio rerio novel protein similar to vertebrate solute carrier family 32 (GABA vesicular transporter), member 1 (SLC32A1) (LOC100002902), mRNA	0	0	0	0	0	0.0505	0	0	0	0	0	0	0	0	0	0	0	0	0	0	0	0
gi|125845752|ref|XM_691681.2| PREDICTED: Danio rerio c-type lectin domain family 11 member A-like (LOC568355), mRNA	0	0	0.14775	0	0.225	0.2335	0.118	0	0	0	0	0	0	1.231	0	0	0	0	2.322	0	0	0.855667
gi|125845852|ref|XM_001332032.1| PREDICTED: Danio rerio macrophage mannose receptor 1-like protein 1-like, transcript variant 1 (LOC793091), mRNA	0	0	0	0	0	0	0	0	0	0	0	0	0	0	0	0	0	0	0	0	0	0
gi|125845862|ref|XM_680136.2| PREDICTED: Danio rerio si:ch211-285c6.3 (si:ch211-285c6.3), mRNA	0.416	0	0	0	0	0	0	0	0	0	0	0	0	0	0	0	0	0	0	0	0.11	0
gi|125845876|ref|XM_001334367.1| PREDICTED: Danio rerio hypothetical protein LOC794438 (LOC794438), mRNA	0	0.237	0.05225	0	0	0.06125	0.13	0.23	0	0.484	0.118	0.304	0	0.378	0	0.64	0	0	0	0	0	0.0213333
gi|125845887|ref|XM_001335127.1| PREDICTED: Danio rerio caspase-8-like (LOC795066), mRNA	0	0	0	0	0	0	0	0	0	0	0	0	0	0	0	0	0	0	0.0885	0	0	0
gi|125846035|ref|XM_001344080.1| PREDICTED: Danio rerio b2 bradykinin receptor-like (LOC100004938), mRNA	0	0	0	0	0	0	0	0	0	0	0	0	0	0	0	0	0	0	0	0	0	0
gi|125846171|ref|XM_685840.2| PREDICTED: Danio rerio protein phosphatase 2, regulatory subunit B', alpha isoform (ppp2r5a), mRNA	0	0.287	0.015	0	0	0.034	0.787	0.835	0	1.61	1.147	0.184	0.238	0.091	0.736	0	0.128	1.146	0.527	0.171	0.851	0.0416667
gi|125846332|ref|XM_677841.2| PREDICTED: Danio rerio BTB and CNC homology 1, basic leucine zipper transcription factor 2 (bach2), mRNA	1.559	0	0.04475	0.1485	0.0665	0.40825	0.142	0	0	0.088	0.172	0	0.998	0.11	0	0	0.308	0.459	1.0615	0	0.3805	0
gi|125846657|ref|XM_681410.2| PREDICTED: Danio rerio si:ch211-195e3.4 (si:ch211-195e3.4), mRNA	3.528	0.226	0.35525	0	0	0	0	0	0.101	0	0	0	0	0	0	0	0.101	0	0.3605	0	0	0.0226667
gi|125846905|ref|XM_001342341.1| PREDICTED: Danio rerio hypothetical protein LOC100002633 (LOC100002633), mRNA	0.199	0.364	0	0	0.0635	0.0625	0.133	0.94	0.109	0.124	0.242	0.778	0.401	0.155	0.207	0.437	1.084	0.215	0	0.033	0.053	0.709333
gi|125847491|ref|XM_001343499.1| PREDICTED: Danio rerio HAUS augmin-like complex, subunit 1 (haus1), mRNA	3.497	3.866	1.6995	2.5765	9.1275	5.37825	3.496	7.494	5.034	0.789	3.862	0	5.758	1.355	0	1.392	1.209	0	11.272	2.703	2.04	4.416
gi|125847644|ref|XM_685972.2| PREDICTED: Danio rerio endoplasmic reticulum mannosyl-oligosaccharide 1,2-alpha-mannosidase-like (LOC562592), mRNA	0.628	2.289	1.9935	3.5985	8.76	4.48675	4.098	5.473	3.7	3.035	3.583	3.524	3.788	4.085	1.957	3.022	16.025	1.286	9.1555	4.454	3.172	1.62467
gi|125847646|ref|XM_687456.2| PREDICTED: Danio rerio collagen alpha-2(XI) chain-like (LOC564099), mRNA	0	0	0.467	0.289	0.0515	0	0.761	0	0.178	1.051	1.03	0	0.131	0	0.068	0.071	0.142	0.281	2.3285	1.431	4.7095	0.00866667
gi|125847850|ref|XM_001335130.1| PREDICTED: Danio rerio granzyme K-like (LOC795070), mRNA	0	0.25	0	0	0	0	0.548	0	0	0.255	0.25	0	0	0	0	0	0	0	0	0	0.167	0.009
gi|125848111|ref|XM_001344501.1| PREDICTED: Danio rerio hypothetical protein LOC100005504 (LOC100005504), mRNA	0	0	0	0	0	0	0	0	0	0	0	0	0	0	0	0	0	0	0	0	0	0
gi|125848195|ref|XM_001333556.1| PREDICTED: Danio rerio transmembrane protein 151B-like (LOC793763), mRNA	0	0	0.0255	0	0	0	0	0	0	0	0	0	0	0	0	0	0	0	0	0	0	0.076
gi|125848227|ref|XM_001334215.1| PREDICTED: Danio rerio hypothetical protein LOC795391 (LOC795391), mRNA	0	0	0	0	0	0	0	0	0	0	0	0	0	0	0	0.524	0	0	0.065	0	0	0
gi|125848594|ref|XM_695292.2| PREDICTED: Danio rerio ADAM metallopeptidase with thrombospondin type 1 motif, 3 (adamts3), mRNA	0	0.162	0.041	0	0.0285	0.036	0.119	0	0.049	0.166	0.108	0	0	0	0	0.195	0.048	0	0	0.8415	0.0595	0.0483333
gi|125848878|ref|XM_677739.2| PREDICTED: Danio rerio trimethyllysine dioxygenase, mitochondrial-like (LOC555271), mRNA	1.085	2.143	0.1155	0.852	1.369	0.614	1.898	2.237	0.592	2.354	0.165	0.423	0.273	1.156	0	2.078	0	0.146	1.8155	0	1.203	0.312333
gi|125849122|ref|XM_678885.2| PREDICTED: Danio rerio DENN/MADD domain containing 1A (dennd1a), mRNA	0.348	0.353	0.17075	0.1215	0.2745	0.30925	0.619	0.274	0.127	1.368	0.353	0.544	0.234	0.18	0	0.381	2.019	1.754	0.5975	0.8115	0.2485	0.723667
gi|125849606|ref|XM_001341313.1| PREDICTED: Danio rerio hypothetical protein LOC100001329 (LOC100001329), mRNA	0	0	0	0	0	0	0	0	0	0	0	0	0	0	0	0	0	0	0	0	0	0
gi|125849637|ref|XM_001342288.1| PREDICTED: Danio rerio hypothetical protein LOC100002567 (LOC100002567), mRNA	0	0	0	0	0	0	0	0	0	0	0	0	0	0	0	0	0	0	0	0	0	0
gi|125849645|ref|XM_001342492.1| PREDICTED: Danio rerio hypothetical protein LOC100002844 (LOC100002844), mRNA	0	0	0	0	0	0	0	0	0	0	0	0	0	0	0	0	0	0	0	0	0	0
gi|125849655|ref|XM_001342705.1| PREDICTED: Danio rerio hypothetical protein LOC100003109 (LOC100003109), mRNA	0	0	0.38425	0	0	0	0	0	0.233	0.529	0	0	0	0	2.218	0	0	0	0	0	0.513	0
gi|125849661|ref|XM_694861.2| PREDICTED: Danio rerio hypothetical protein LOC571286 (LOC571286), mRNA	0	0	0	0	0	0	0	0	0	0	0	0	0	0	0	0	0	0	0	0	0	0.0523333
gi|125849685|ref|XM_001343462.1| PREDICTED: Danio rerio hypothetical protein LOC100004104 (LOC100004104), mRNA	0	0	0	0	0	0	0	0	0	0.273	0	0	0	0	0.457	0	0	0	0	0	0	0.467
gi|125850015|ref|XM_681415.2| PREDICTED: Danio rerio extracellular matrix protein 2, female organ and adipocyte specific (ecm2), mRNA	0	0.162	0.60725	0	0.19	0.141	0.532	0.157	0.291	0.33	0.485	1.972	0.535	0.052	0.415	0	0.072	0	0.24	0	0.501	0.958667
gi|125850060|ref|XM_001334419.1| PREDICTED: Danio rerio potassium voltage-gated channel subfamily A member 1-like (LOC795942), mRNA	0	0	0	0	0	0	0	0	0	0	0	0	0	0	0	0	0	0	0	0	0	0.546
gi|125850071|ref|XM_688200.2| PREDICTED: Danio rerio si:dkeyp-4h4.1 (si:dkeyp-4h4.1), mRNA	0	0	0	0	0	0	0	0	0	0	0	0	0	0	0	0	0	0	0	0	0.0775	0
gi|125850101|ref|XM_001335857.1| PREDICTED: Danio rerio hypothetical protein LOC798435 (LOC798435), mRNA	0.469	0.855	0.11125	0	0	0	0.312	0.552	0.512	0	0	4.02	0	0	0	0	4.328	0	0	5.6355	0	0.564667
gi|125850180|ref|XM_690333.2| PREDICTED: Danio rerio cathepsin K, like (ctskl), mRNA	0	0	0.101	0	0	0	0	0	0	0	0	0	0	0.353	0	0	0	0	0	0	0	0.00666667
gi|125850501|ref|XM_678037.2| PREDICTED: Danio rerio similar to interferon-induced, hepatitis C-associated microtubular aggregat (LOC555512), mRNA	0	0	0	0	0.0605	0	0.063	0	0	0	0.347	0	0	0.074	0	0	0	0	0	0	0.0775	1.021
gi|125850778|ref|XM_001337470.1| PREDICTED: Danio rerio macrophage mannose receptor 1-like protein 1-like, transcript variant 1 (LOC100001222), mRNA	0	0	0	0	0	0	0	0	0	0	0	0	0	0	0	0	0	0	0	0	0	0
gi|125850780|ref|XM_001337549.1| PREDICTED: Danio rerio novel protein containing lectin C-type domains, transcript variant 1 (LOC100001288), mRNA	0	0	0	0	0	0	0	0	0	0	0	0	0	0	0	0	0	0	0	0	0	0
gi|125850794|ref|XM_001342290.1| PREDICTED: Danio rerio secretory phospholipase A2 receptor-like (LOC100002569), mRNA	0	0	0	0	0	0	0	0	0	0	0	0	0	0	0	0	0	0	0	0	0	0
gi|125851106|ref|XM_001339599.1| PREDICTED: Danio rerio high affinity choline transporter 1-like (LOC799259), mRNA	0	0	0.01225	0	0	0	0	0	0	0	0	0	0.967	0.075	0	0	0	0	0	0.5895	0	0
gi|125851163|ref|XM_001342239.1| PREDICTED: Danio rerio tripartite motif protein 21-like (LOC100002502), mRNA	0	0	0	0	0	0	0	0	0	0	0	0	0	0.095	0	0.269	0.134	0.265	0	0	0	0
gi|125851410|ref|XM_001341527.1| PREDICTED: Danio rerio thyrotropin subunit beta-like (LOC100001596), mRNA	0	0	0	0	0	0	0	0	0	0	0	0	3.448	0	0	0	0	0	0	0	0	0
gi|125851472|ref|XM_001343202.1| PREDICTED: Danio rerio protein NLRC3-like (LOC100003765), mRNA	0	0	0.0135	0	0	0	0	0	0	0	0	0	0	0	0	0	0	0	0	0	0	0
gi|125851474|ref|XM_687939.2| PREDICTED: Danio rerio complement C1q tumor necrosis factor-related protein 7-like (LOC564609), mRNA	0	0	0	0	0	0	0	0	0.215	0	0	0	0	0	0	0	0	0	0	0	0	0.235667
gi|125851518|ref|XM_691422.2| PREDICTED: Danio rerio protein Wnt-7a-like (LOC568110), mRNA	0	0	0.0205	0	0	0	0	0	0	0	0	0	0	0	0	0	0	0	1.7695	0	0	0
gi|125851585|ref|XM_680900.2| PREDICTED: Danio rerio solute carrier family 26 member 6-like (LOC557779), mRNA	0	0	0	0	0	0	0	0	0	0	0	0	0	0	0	0	0	0	0	0	0	0
gi|125851586|ref|XM_681704.2| PREDICTED: Danio rerio similar to SI:dZ182N13.1 (first exon of novel protein ) (LOC558486), mRNA	0	0	0.15825	0	0	0	0	0	0.114	0	0	0	0	0	0	0	0.114	0	0	0	0	0.223667
gi|125851604|ref|XM_691171.2| PREDICTED: Danio rerio solute carrier organic anion transporter family, member 4A1 (slco4a1), mRNA	0	0	0	0	0	0	0	0	0	0	0	0	0	0	0	0	0	0	0	0	0	0.274333
gi|125851649|ref|XM_001337666.1| PREDICTED: Danio rerio si:ch211-235f6.2 (si:ch211-235f6.2), mRNA	0.222	0.135	0.2135	0	0.1745	0	0.222	0	0	0.138	0	0	0	0	0	0	0	0	0.181	0	0	0.633667
gi|125851800|ref|XM_001344412.1| PREDICTED: Danio rerio hypothetical protein LOC100005368 (LOC100005368), mRNA	0	0	0	0.41	0	0	0	0	0	0.279	0	0	0	0	0	0	0	0	0	0	0	0
gi|125851882|ref|XM_693442.2| PREDICTED: Danio rerio major facilitator superfamily domain-containing protein 2A-like (LOC570014), mRNA	0	0.532	0.02775	0.1145	1.2805	1.26875	0.729	3.867	0.358	4.341	6.377	0	0	0.085	0	0	0	0	0	0	0	0.0336667
gi|125851909|ref|XM_001338327.1| PREDICTED: Danio rerio cysteine string protein-like (LOC797907), mRNA	1.237	2.506	1.59875	0.9665	2.088	0.81775	1.923	4.372	0.45	2.556	1.001	0.965	2.488	0.639	3.428	1.805	0.448	1.334	2.496	0	1.2165	0.525667
gi|125851926|ref|XM_001339539.1| PREDICTED: Danio rerio kelch domain-containing protein 8B-like (LOC799189), mRNA	0	0.191	0	0	0	0	0	0	0	0	0	0.49	0	0.365	0	1.031	0.171	0	0	0	0	0
gi|125851949|ref|XM_001338425.1| PREDICTED: Danio rerio growth hormone secretagogue receptor type 1-like (LOC100000406), mRNA	0	0	0	0	0	0	0	0	0	0	0	0	0	0	0	0	0	0	0	0	0	0
gi|125851981|ref|XM_001339095.1| PREDICTED: Danio rerio si:rp71-17i16.4 (si:rp71-17i16.4), mRNA	0	0	0	0	1.1005	0	0	0.516	0	0.271	0.532	0	0	0.17	0	0	0	0	0	0	0.348	0.696667
gi|125852171|ref|XM_691014.2| PREDICTED: Danio rerio nucleolar protein 9 (nol9), mRNA	1.874	1.353	1.03125	0.765	1.516	1.56	0.936	0.69	1.342	0.654	0.853	1.461	0.471	0.681	1.948	0.513	2.672	0.442	0.784	0.7215	1.362	8.73967
gi|125852177|ref|XM_684560.2| PREDICTED: Danio rerio si:ch73-206d17.1 (si:ch73-206d17.1), mRNA	0	0	0	0	0	0	0	0	0	0	0.133	0	0	0.085	0	0	0	0	0.03	0	0	0.428667
gi|125852185|ref|XM_690519.2| PREDICTED: Danio rerio extended synaptotagmin-like protein 1a (esyt1a), mRNA	0.1	0.243	0.07525	0.0525	0.4585	0.334	0.2	0.236	0	0.124	0.365	0	0.302	0.078	0.936	0	0.054	0.324	0.1375	0	0.108	0.203667
gi|125852482|ref|XM_691486.2| PREDICTED: Danio rerio suppressor of IKBKE 1-like (LOC568173), mRNA	0	0.649	0	0	0	0	0	0	0.582	0.331	0	0	0	0	0	0	0	0	0	0	0	0.943
gi|125852491|ref|XM_691704.2| PREDICTED: Danio rerio von Willebrand factor A domain-containing protein 1-like (LOC568379), mRNA	0.595	0.181	0.64925	0.1555	0.446	1.5615	0.347	0	0.73	1.291	1.716	0	0	0.23	0.155	0.163	0	0	4.844	0	0.0395	4.91333
gi|125853007|ref|XM_001344819.1| PREDICTED: Danio rerio F-box and leucine-rich repeat protein 7 (fbxl7), mRNA	0	0	0	0	0.3735	0	0	0	0	0.294	0	0	0	0	0	0	0	0	0	0	0	0
gi|125853049|ref|XM_001333296.1| PREDICTED: Danio rerio zinc finger protein Xfin-like (LOC793549), mRNA	0.505	0.061	0.01525	0.053	0.5425	0.13725	0.505	1.072	0.497	0.878	0.43	0	0.407	0.039	0	0.111	0	0	2.3695	1.379	0.3125	0.139333
gi|125853134|ref|XM_001340119.1| PREDICTED: Danio rerio e3 ubiquitin-protein ligase TRIM21-like (LOC799840), mRNA	0	0	0	0	0	0.0295	0	0	0	0	0	0	0	0	0	0	0	0	0	0	0.0545	1.18467
gi|125853174|ref|XM_001341260.1| PREDICTED: Danio rerio uracil nucleotide/cysteinyl leukotriene receptor-like (LOC100001258), mRNA	0	0	0	0	0	0	0	0	0	0	0	0	0	0	0	0	0	0	0	0	0	0
gi|125853301|ref|XM_684065.2| PREDICTED: Danio rerio 5-methyltetrahydrofolate-homocysteine methyltransferase reductase (mtrr), mRNA	1.426	0.63	0.427	0.4395	0.3675	0.62975	1.08	1.528	0.566	0.804	0.866	0.101	0.522	0	0	0.851	0.211	1.958	0.1585	1.9905	0.594	1.83867
gi|125853311|ref|XM_696207.2| PREDICTED: Danio rerio hypothetical protein LOC553217 (LOC553217), mRNA	0	0	0	0	0	0	0	0	0	0	0	0	0	0	0	0	0.1	0	0.025	0	0	1.15667
gi|125853529|ref|XM_695291.2| PREDICTED: Danio rerio DnaJ (Hsp40) homolog, subfamily C, member 5 beta (dnajc5b), mRNA	0.407	0	0	0	0	0	0	0	0	0	0	0	0	0	0	0	0	0	0.34	0.2685	0	0.631333
gi|125853675|ref|XM_679113.2| PREDICTED: Danio rerio leucine-rich repeat-containing protein 31-like (LOC556343), mRNA	1.722	0	1.29875	0.494	0.7335	0.5185	0.402	0.203	0.564	0.427	0.314	0	0	0	0	0	0.187	0.65	0	0	1.68	0.276333
gi|125853678|ref|XM_679547.2| PREDICTED: Danio rerio probable cationic amino acid transporter-like (LOC556696), mRNA	0	0	0	0	0	0	0	0	0	0	0	0	0	0	0	0	0	0	0.2695	0	0	0
gi|125853746|ref|XM_001339010.1| PREDICTED: Danio rerio trans-2,3-enoyl-CoA reductase-like (LOC798606), mRNA	0	0	0	0	0	0	0	0	0	0	0.215	0	0	0	0	0	0	0	0	0	0	0
gi|125854013|ref|XM_690895.2| PREDICTED: Danio rerio uncharacterized protein C7orf50 homolog (LOC567594), mRNA	3.065	0.621	4.96925	1.5115	3.867	2.3335	3.972	6.021	1.859	2.323	6.413	4.782	7.197	3.167	6.019	10.81	8.513	0	8.25	0	2.546	17.927
gi|125854136|ref|XM_696158.2| PREDICTED: Danio rerio hypothetical protein LOC572443 (LOC572443), mRNA	0	0	0	0	0	0	0	0	0	0	0	0	0	0	0	0	0	0	0	0	0	1.022
gi|125854138|ref|XM_001344014.1| PREDICTED: Danio rerio hypothetical protein LOC100004848 (LOC100004848), mRNA	0	0	0	0	0	0	0	0	0	0	0	0	0	0	0	0	0	0	0	0	0	0.641667
gi|125854140|ref|XM_001344086.1| PREDICTED: Danio rerio hypothetical protein LOC100004944 (LOC100004944), mRNA	0	0	0	0	0	0	0	0	0	0	0	0	0	0	0	0	0	0	0	0	0	0
gi|125854144|ref|XM_001344197.1| PREDICTED: Danio rerio hypothetical protein LOC100005096 (LOC100005096), mRNA	0	0	0	0	0	0	0	0	0	0	0	0	0	0	0	0	0	0	0	0	0	0.125333
gi|125854238|ref|XM_693428.2| PREDICTED: Danio rerio probable G-protein coupled receptor 158-like (LOC570001), mRNA	0.085	0	0.04925	0	0	0	0	0	0	0	0	0	0	0.164	0.088	0	0	0	0	0	0.0225	0.174333
gi|125854286|ref|XM_692188.2| PREDICTED: Danio rerio uncharacterized protein C17orf105 homolog (LOC568832), mRNA	0	0	0	0	0	0	0	0	0	0	0	0	0	0	0	0	0	0	0	0	0	0
gi|125854300|ref|XM_695195.2| PREDICTED: Danio rerio Arg8-vasotocin receptor-like (LOC571591), mRNA	0	0.181	1.76675	0.156	1.4125	0.0605	2.082	1.403	0.162	1.476	1.446	0	0	0	0	0	0	0	5.8265	0.098	2.804	0
gi|125854388|ref|XM_001338739.1| PREDICTED: Danio rerio leucine-rich repeat-containing protein 10B-like (LOC798319), mRNA	1.393	0	0	0	0	0	0	0	0	0.173	0.169	0	0	0	0	0	0	0	0	0	0	0.673
gi|125854537|ref|XM_001343816.1| PREDICTED: Danio rerio hypothetical protein LOC100004590 (LOC100004590), mRNA	4.15	2.691	3.8685	0.4345	2.7415	0.854	2.95	1.957	0.151	1.544	1.176	0.647	0.557	0	0	1.211	1.503	6.718	1.81	12.19	0.8165	0
gi|125854539|ref|XM_001343935.1| PREDICTED: Danio rerio muscarinic acetylcholine receptor M4-like (LOC100004742), mRNA	0.482	0.293	0.26275	0	0	0	0	0	0	0.598	0.146	0	1.941	0.934	0	1.847	0	0	0.2995	1.0565	0	0
gi|125854675|ref|XM_694635.2| PREDICTED: Danio rerio serine protease 27-like (LOC571079), mRNA	0	0	0	0	0	0	0	0	0	0	0	0	0	0	0	0	0	0	0	0	0	0
gi|125854684|ref|XM_681686.2| PREDICTED: Danio rerio 5'-nucleotidase domain containing 3 (nt5dc3), mRNA	0.537	0.109	0.18625	0	0.114	0.0515	0.06	0	0.098	0.111	0	0	0	0	0	0	0	0	0	0	0.1205	0.264
gi|125854689|ref|XM_682080.2| PREDICTED: Danio rerio EF-hand calcium-binding domain-containing protein 6-like (LOC558813), mRNA	0	0	0	0	0	0.0395	0	0	0	0	0	0	0	0.106	0	0.3	0	0	0.5375	0	0	0.012
gi|125854757|ref|XM_001340183.1| PREDICTED: Danio rerio hypothetical protein LOC799915 (LOC799915), mRNA	0	0.255	0.139	0	0	0	0	0	0	0	0	0	0	0	0	0	0	0	0	0	0	0
gi|125854774|ref|XM_694777.2| PREDICTED: Danio rerio potassium voltage-gated channel subfamily A member 1-like (LOC571208), mRNA	0	0	0	0	0	0	0	0	0	0.142	0	0	0	0	0	0	0	0	0	0	0	0.437333
gi|125854915|ref|XM_693273.2| PREDICTED: Danio rerio hypothetical LOC569861 (LOC569861), mRNA	0.413	0	0.085	0	0	0.056	0	0	0.075	0.171	0	0	0	0	0	0	0	0	0	0	0	0.0363333
gi|125854944|ref|XM_001338104.1| PREDICTED: Danio rerio c-C motif chemokine 2-like (LOC797669), mRNA	0	0	0	0	0	0	0	0	0	0	0	0	0	0	0	0	0	0	0	0	0	1.29
gi|125855317|ref|XM_693694.2| PREDICTED: Danio rerio synaptotagmin VIII (syt8), mRNA	0.551	0	0	0	0	0	0	0	0	0	0	0	0	0	0	0	0	0	0	0	0	0.396667
gi|125855522|ref|XM_001334221.1| PREDICTED: Danio rerio structural maintenance of chromosomes 1B, transcript variant 1 (smc1b), mRNA	0	0	0	0	0	0	0	0	0	0	0	0	0	0	0	0	0	0	0	0	0	0
gi|125855666|ref|XM_683203.2| PREDICTED: Danio rerio histone H2B-like (LOC559827), mRNA	0	0	0	0	0	0	0	0	0	0	0	0	0	0	0	0	0	0	0	0	0	0
gi|125855692|ref|XM_001338920.1| PREDICTED: Danio rerio histone H2A-like (LOC100004768), mRNA	2.703	0.411	0.40575	0	0.317	0	0.225	1.593	0	0.419	0	0	0	1.047	0	0	0	0	0.2885	0.49	0	0.664333
gi|125856056|ref|XM_001344394.1| PREDICTED: Danio rerio 5-hydroxytryptamine (serotonin) receptor 1F-like (LOC100005344), mRNA	0	0	0	0	0	0	0	0	0	0	0	0	0	0	0	0	0	0	0	0	0	0.07
gi|125864378|ref|XM_001339925.1| PREDICTED: Danio rerio WD repeat-containing protein 53-like (LOC799626), mRNA	0	0	0.03825	0.1585	0	0	0	0	0	0	0	0	0	0	0	0	0	0	0	0	0	0
gi|125864736|ref|XM_001334054.1| PREDICTED: Danio rerio cytochrome P450 2K1-like (LOC100001426), mRNA	0	0	0	0	0	0	0	0	0	0	0	0	0	0.174	0	0	0	0	0	0	0	1.92933
gi|125864930|ref|XM_692512.2| PREDICTED: Danio rerio ATP-sensitive inward rectifier potassium channel 12-like (LOC569146), mRNA	0	0	0	0	0	0.03725	0	0.304	0	0	0	0	0	0	0	0	0	0	0.1055	0	0	0
gi|125865233|ref|XM_692105.2| PREDICTED: Danio rerio c2 calcium-dependent domain-containing protein 4C-like (LOC568754), mRNA	0	0	0	0	0	0	0	0	0	0	0	0	0	0	0	0	0	0	0	0	0	0
gi|125870828|ref|XM_684005.2| PREDICTED: Danio rerio extracellular calcium-sensing receptor-like (LOC560607), mRNA	0	0	0	0	0	0	0	0	0	0	0	0	0	0	0	0	0	0	0	0	0	0
gi|125871742|ref|XM_001345884.1| PREDICTED: Danio rerio zinc finger protein 180-like (LOC100007471), mRNA	0	0.393	2.07325	0	1.6385	0.1015	0.647	1.906	0.353	0.201	1.375	0	0	0	0	0	2.109	7.502	8.335	0	1.389	0
gi|125951221|ref|XM_692156.2| PREDICTED: Danio rerio ras-related protein Rab-31-like (LOC568800), mRNA	0	0	0	0.3035	0.272	0	0	0	0.317	0	0.704	0	2.334	0.225	0	0.635	0	0	0	0	0	0.231333
gi|125991239|ref|NM_001081574.1| Danio rerio zgc:158219 (zgc:158219), mRNA	1.369	1.063	0.6085	1.309	1.1145	0.879	1.267	1.165	0.747	2.311	1.756	0.119	0.383	0.383	0.237	1.582	0.413	1.149	3.5145	0.3085	1.7505	0.693333
gi|125991749|ref|NM_001020779.2| Danio rerio si:ch211-22i13.2 (si:ch211-22i13.2), mRNA	0.747	3.18	0.88275	0.261	2.5565	2.16725	3.818	9.1	2.72	6.333	4.992	0.583	2.255	2.509	7.249	3.544	2.977	2.553	2.4895	1.6005	1.9675	10.0613
gi|125995395|ref|NM_001081631.1| Danio rerio rho guanine nucleotide exchange factor (GEF) 1 (arhgef1), mRNA	1.276	1.212	1.15425	0.9145	6.539	1.73325	1.514	6.108	0.827	4.747	6.489	5.597	15.643	14.55	3.729	14.223	0.823	1.29	1.9	0	0.961	0.650333
gi|125995397|ref|NM_001081628.1| Danio rerio cell adhesion molecule-related/down-regulated by oncogenes (cdon), mRNA	14.93	6.398	14.6758	3.7005	7.313	7.81925	19.9	3.269	6.77	32.938	9.366	10.882	7.06	4.678	3.562	4.018	28.46	15.274	126.583	59.9945	33.931	0.568
gi|125995399|ref|NM_001081629.1| Danio rerio SWI/SNF related, matrix associated, actin dependent regulator of chromatin, subfamily a, member 5 (smarca5), mRNA	26.253	13.053	13.5455	3.5425	13.438	6.14525	14.497	18.123	3.43	11.106	6.948	16.309	5.661	10.79	4.191	10.467	8.508	7.537	23.5425	7.319	7.0315	16.6837
gi|125995401|ref|NM_001081632.1| Danio rerio ST8 alpha-N-acetyl-neuraminide alpha-2,8-sialyltransferase 1 (st8sia1), mRNA	0.627	1.754	0.31725	0.263	0.412	0.0905	1.756	0.739	0.822	2.023	2.896	3.033	1.136	2.917	2.739	1.648	1.023	3.249	1.5485	1.0665	0.858	0.276
gi|126157454|ref|NM_001081689.1| Danio rerio carbonic anhydrase XV a (ca15a), mRNA	1.434	0	0	0	0	0	0.08	0	0	0	0	0	0	0	0	0	0.13	0	0	0	0	0.568
gi|126157483|ref|NM_001081690.1| Danio rerio similar to chymotrypsinogen B1 (LOC562139), mRNA	0	0.457	0	0	0	0	0.876	0	0	0	0.228	0.293	0	0.437	3.124	0	14.085	1.216	0.2115	0	9.5155	3.18333
gi|126157485|ref|NM_001081692.1| Danio rerio lysine (K)-specific demethylase 2Aa (kdm2aa), transcript variant 2, mRNA	0	0.127	0	0.3805	0	0.06025	0.139	0	0	0.259	0	0.816	0	0.324	0	0.458	0.114	0.113	0.142	0	0	2.698
gi|126158896|ref|NM_001014350.2| Danio rerio zgc:110801 (zgc:110801), mRNA	1.942	2.676	0.58775	1.2495	0.695	2.16075	3.193	4.731	1.131	4.256	2.281	1.212	2.475	1.806	0.942	1.842	5.628	2.235	1.1635	0.576	0.9915	6.93067
gi|126158900|ref|NM_198817.2| Danio rerio starmaker (stm), mRNA	14.961	150.105	32.5427	26.1435	21.5345	10.7152	149.21	77.538	143.838	65.345	11.601	0.993	8.755	6.743	0.221	5.574	79.277	26.448	5.0865	6.888	0.3005	0.938
gi|126158904|ref|NM_001077726.2| Danio rerio zgc:154064 (zgc:154064), mRNA	11.437	9.857	14.4885	6.92	21.6685	12.6487	11.434	10.37	8.234	9.354	8.55	5.98	10.75	9.837	5.749	6.603	5.054	3.255	15.992	10.5655	10.7995	8.43067
gi|126158910|ref|NM_001008626.2| Danio rerio zgc:101757 (zgc:101757), mRNA	0.457	5.613	0.078	1.003	0.4905	0.7975	5.513	2.047	1.497	2.381	1.666	3.779	0.736	7.013	5.226	3.102	4.421	10.554	0.6725	0.304	0.7465	2.44167
gi|126215529|ref|NM_001081749.1| Danio rerio zinc finger protein 346 (znf346), mRNA	0	0.597	0.57575	0.0735	0.2895	0.17	0.327	0	0.766	0	1.278	0.438	0.423	0.652	0.146	0	1.905	0.454	0.076	0.1015	2.1295	2.738
gi|126722694|ref|NM_001013316.2| Danio rerio zgc:110759 (zgc:110759), mRNA	0	0.067	0	0.0575	0.5205	0.2925	0.256	0	0.06	0.204	0.067	0	0.11	0.127	0.114	0	0	0.118	0	0	0.029	1.84333
gi|126723424|ref|NM_001082482.1| Danio rerio growth hormone releasing hormone receptor, like (ghrhrl), mRNA	0	0	0	0	0	0	0	0	0.606	0	0	0	0.223	0	0.231	0	0	0	0	0	0.6315	0.291333
gi|126723552|ref|NM_001082411.1| Danio rerio zgc:158773 (zgc:158773), mRNA	0	0	0	0	0	0	0	0	0	0	0	0.334	0	0	0	0	0	0	0	0	0	1.27833
gi|126723627|ref|NM_001082481.1| Danio rerio zgc:158399 (zgc:158399), mRNA	9.345	5.734	3.67625	4.808	6.395	7.8195	6.668	6.026	3.273	4.647	2.891	3.094	5.5	4.338	4.307	4.535	3.545	1.76	6.628	4.375	3.64	24.504
gi|127138930|ref|NM_181437.3| Danio rerio prolactin (prl), mRNA	0	0	0	0	0	0	0	0	0	0	0	0.186	0	0	0	0	0	0	0	0	0.097	0.051
gi|127139520|ref|NM_199542.2| Danio rerio structural maintenance of chromosomes 2 (smc2), mRNA	1.582	1.215	0.3195	0.3465	0.564	0.97875	1.082	2.258	0.455	0.93	0.354	0.455	0.251	0.323	0.173	0.182	0.362	0.045	2.465	2.3605	0.929	8.73867
gi|128485461|ref|NM_001082551.1| Danio rerio Wolf-Hirschhorn syndrome candidate 1 (whsc1), mRNA	1.459	0.771	0.7365	0.2485	1.113	0.406	0.93	0.299	0.104	1.102	0.578	0.049	0.128	0.123	0.594	0.486	0.172	0.205	1.9205	0.9845	0.3915	5.52067
gi|129270060|ref|NM_001007158.2| Danio rerio polycomb group ring finger 1 (pcgf1), mRNA	0	0	0.2165	0.8035	0.1095	0.90375	0.685	1.212	0.374	0.213	0.208	0	0	1.062	0	0	0.372	1.849	1.104	1.6715	0.46	9.172
gi|129270066|ref|NM_001007760.2| Danio rerio PDZK1 interacting protein 1, like (pdzk1ip1l), mRNA	0.842	1.023	1.02725	4.4925	0.676	0.5495	1.907	1.587	1.93	1.514	2.3	0.525	3.895	1.174	0.962	1.474	0.594	3.36	1.3295	1.3035	3.4475	2.08633
gi|129270069|ref|NM_001044841.2| Danio rerio si:dkey-14d8.5 (si:dkey-14d8.5), mRNA	0	7.847	0.18625	0.4745	0.251	1.0275	5.961	1.868	0.495	2.668	0.138	1.413	0	12.196	9.887	0.496	10.705	7.575	0.4175	0	0.8845	0
gi|129270072|ref|NM_001034993.2| Danio rerio Indian hedgehog homolog a (ihha), mRNA	7.557	1.404	0.7525	0.382	0	0	3.008	0.247	0.115	0.781	0.128	0.819	0	2.847	2.182	0.46	0.342	1.812	0.114	0.5115	0	0.218667
gi|129270077|ref|NM_001042694.2| Danio rerio fukutin (fktn), mRNA	1.499	1.936	1.037	1.0745	1.448	1.32475	2.684	2.87	1.125	0.929	1.024	0	0.565	0.363	0.974	1.23	0.407	0	2.3735	0	2.155	0.782333
gi|129270079|ref|NM_198144.2| Danio rerio empty spiracles homeobox 1 (emx1), mRNA	0	0	0	0.4935	0	0	0.181	0	0	0.336	0	0.212	0.546	0.21	1.409	0	0	0.146	0.037	0	0	0.036
gi|129270082|ref|NM_001044872.2| Danio rerio si:dkey-30c15.13 (si:dkey-30c15.13), mRNA	0	0	0	0	0	0	0	0	0	0	0	0	0	0	0.543	0	0	0	0	0	0	2.988
gi|129270095|ref|NM_001044717.2| Danio rerio si:ch211-212d10.2 (si:ch211-212d10.2), mRNA	0	0.131	0.01875	0	0.1695	0	0	0.253	0.117	0.533	0.783	0	0.433	0.167	0	0	0.818	0.232	0	0	0.2625	2.41267
gi|129270099|ref|NM_001025507.3| Danio rerio cation/H+ exchanger protein 1 (cax1), mRNA	0.388	2.279	0.2335	1.9245	2.2225	0.2235	4.437	2.743	1.129	3.367	3.848	1.714	2.341	3.256	2.957	1.839	0.632	2.511	1.9945	0.694	1.4695	16.0447
gi|129270101|ref|NM_001030253.2| Danio rerio B-cell leukemia/lymphoma 2 (bcl2), mRNA	1.18	8.787	4.4065	0.846	2.79	4.60225	11.894	3.824	0.805	14.635	6.987	10.354	2.671	9.944	3.68	5.811	7.533	18.302	9.6405	6.1915	5.465	0.078
gi|129270106|ref|NM_001020503.2| Danio rerio synaptonemal complex central element protein 2 (syce2), mRNA	0	0	0.132	0.1265	0.077	0.3485	0	0	0.132	0.15	0	0	0.487	0	0	0	0	0	0.033	0.494	0	2.32167
gi|129270110|ref|NM_001007031.2| Danio rerio family with sequence similarity 101, member A (fam101a), mRNA	0.31	0.377	0.4895	0	0.343	0.4255	0.619	0.73	0.169	0.192	0.376	0.725	0.623	1.44	0	0.339	0.168	0.167	0	0.153	0.9145	0.733
[truncated: 23,103 more rows]
